# Supplementary material
Source: PubMed Central journal article supplement (PMC5962893)
Supplement: jgv-98-1274-s001.pdf [file jgv-98-1274-s001.pdf]

**Table S1.** Haemagglutination titer variability of virus isolates from 2000 to 2016 depending on erythrocyte origin and absence or presence of Oseltamivir

| Virus isolate | Haemagglutination titre (HAU/25µl) |     |                           |     |
|---------------|------------------------------------|-----|---------------------------|-----|
|               | Turkey erythrocytes                |     | Human type O erythrocytes |     |
|               | Oseltamivir                        |     | Oseltamivir               |     |
|               | -                                  | +   | -                         | +   |
| A/NL/051/00   | 64                                 | 48  | 64                        | 64  |
| A/NL/056/00   | 32                                 | 16  | 32                        | 32  |
| A/NL/073/00   | 16                                 | 16  | 16                        | 16  |
| A/NL/197/00   | 32                                 | 16  | 48                        | 32  |
| A/NL/304/00   | 8                                  | 8   | 32                        | 32  |
| A/NL/116/01   | 32                                 | 32  | 32                        | 32  |
| A/NL/118/01   | 24                                 | 24  | 32                        | 32  |
| A/NL/124/01   | >64                                | >64 | >64                       | >64 |
| A/NL/126/01   | 64                                 | 32  | >64                       | 64  |
| A/NL/150/01   | >64                                | >64 | >64                       | >64 |
| A/NL/001/02   | 64                                 | 64  | 48                        | 48  |
| A/NL/140/02   | 64                                 | 64  | 64                        | 64  |
| A/NL/311/02   | 32                                 | 32  | 48                        | 32  |
| A/NL/326/02   | >64                                | >64 | 32                        | 32  |
| A/NL/333/02   | 64                                 | 64  | 32                        | 32  |
| A/NL/017/03   | >64                                | >64 | >64                       | >64 |
| A/NL/109/03   | 64                                 | 64  | >64                       | >64 |
| A/NL/209/03   | >64                                | >64 | >64                       | >64 |
| A/NL/312/03   | >64                                | >64 | >64                       | >64 |
| A/NL/590/03   | >64                                | >64 | >64                       | >64 |
| A/NL/017/04   | <2                                 | <2  | 64                        | 64  |
| A/NL/023/04   | 32                                 | 24  | 64                        | 64  |
| A/NL/067/04   | <2                                 | <2  | 16                        | 16  |
| A/NL/121/04   | 2                                  | <2  | 64                        | 64  |
| A/NL/132/04   | 64                                 | 64  | >64                       | >64 |
| A/NL/075/05   | 32                                 | 16  | 32                        | 16  |
| A/NL/093/05   | 48                                 | 48  | 64                        | 64  |
| A/NL/147/05   | 48                                 | 24  | 64                        | 48  |
| A/NL/252/05   | >64                                | >64 | 64                        | 64  |
| A/NL/548/05   | 4                                  | 4   | 16                        | 16  |
| A/NL/020/06   | 64                                 | <2  | 64                        | 24  |
| A/NL/041/06   | 32                                 | <2  | 64                        | 24  |
| A/NL/182/06   | 32                                 | 32  | 32                        | 32  |
| A/NL/198/06   | 64                                 | 64  | 64                        | 64  |
| A/NL/363/06   | 48                                 | <2  | 64                        | 32  |
| A/NL/004/07   | 48                                 | <2  | >64                       | 32  |
| A/NL/030/07   | >64                                | >64 | >64                       | >64 |
| A/NL/038/07   | 64                                 | 64  | 64                        | 48  |
| A/NL/322/07   | 332                                | 16  | 64                        | 16  |
| A/NL/348/07   | >64                                | 32  | >64                       | 32  |

|              |     |    |      |      |
|--------------|-----|----|------|------|
| A/NL/363/07  | 32  | 64 | 32   | 32   |
| A/NL/177/08  | >64 | <2 | >64  | 64   |
| A/NL/377/08  | 8   | <2 | 32   | 12   |
| A/NL/379/08  | >64 | <2 | 64   | 4    |
| A/NL/385/08  | 4   | 4  | 8    | 4    |
| A/NL/010/09  | 32  | <2 | 64   | 8    |
| A/NL/011/09  | 8   | <2 | 48   | 8    |
| A/NL/013/09  | 32  | <2 | 64   | <2   |
| A/NL/282/09  | 8   | 2  | 16   | 8    |
| A/NL/761/09  | 64  | <2 | 64   | 8    |
| A/NL/009/10  | 8   | <2 | 64   | 32   |
| A/NL/034/10  | 48  | <2 | 64   | 16   |
| A/NL/050/11  | 8   | <2 | 32   | <2   |
| A/NL/063/11  | 48  | <2 | 64   | 32   |
| A/NL/241/11  | 16  | <2 | 48   | 16   |
| A/NL/713/11  | 64  | <2 | 64   | 2    |
| A/NL/702/11  | 48  | <2 | 64   | 16   |
| A/NL/003/12  | 4   | <2 | 8    | 2    |
| A/NL/075/12  | 32  | <2 | 48   | <2   |
| A/NL/117/12  | 32  | <2 | 32   | <2   |
| A/NL/193/12  | 48  | <2 | 64   | 8    |
| A/NL/386/12  | 16  | 16 | 4    | <2   |
| A/NL/622/12  | 32  | <2 | N.T. | N.T. |
| A/NL/2249/13 | 24  | <2 | N.T. | N.T. |
| A/NL/2254/13 | 32  | <2 | N.T. | N.T. |
| A/NL/059/14  | 32  | <2 | N.T. | N.T. |
| A/NL/073/14  | 64  | <2 | N.T. | N.T. |
| A/NL/186/14  | 8   | <2 | N.T. | N.T. |
| A/NL/231/14  | 32  | 2  | N.T. | N.T. |
| A/NL/252/14  | 32  | <2 | N.T. | N.T. |
| A/NL/747/14  | 8   | <2 | N.T. | N.T. |
| A/NL/748/14  | 32  | <2 | N.T. | N.T. |
| A/NL/267/15  | 32  | <2 | N.T. | N.T. |
| A/NL/581/15  | 32  | <2 | N.T. | N.T. |
| A/NL/584/15  | 32  | <2 | N.T. | N.T. |
| A/NL/590/15  | 32  | <2 | N.T. | N.T. |
| A/NL/867/15  | 16  | <2 | N.T. | N.T. |
| A/NL/876/15  | 4   | <2 | N.T. | N.T. |
| A/NL/153/16  | 4   | <2 | N.T. | N.T. |
| A/NL/354/16  | 8   | 2  | N.T. | N.T. |
| A/NL/379/16  | 8   | <2 | N.T. | N.T. |
| A/NL/1713/16 | 8   | <2 | N.T. | N.T. |
| A/NL/2413/16 | 8   | 2  | N.T. | N.T. |

---

N.T. not tested

**Table S2.** Haemagglutination assay using turkey erythrocytes with modified sialic acids and recombinant viruses and reference strains

| Recombinant virus |                   | HA titer (HAU/25µl)       |             |             |
|-------------------|-------------------|---------------------------|-------------|-------------|
| HA                | NA                | Normal<br>SA <sup>*</sup> | α-2,3<br>SA | α-2,6<br>SA |
| A/NL/109/03       | A/NL/109/03       | 256                       | <2          | 128         |
| A/NL/761/09       | A/NL/761/09       | 32                        | <2          | 64          |
| A/NL/109/03       | A/NL/761/09       | 64                        | <2          | 64          |
| A/NL/761/09       | A/NL/109/03       | <2                        | <2          | <2          |
| A/NL/761/09       | A/NL/109/03-150HR | 16                        | 8           | 32          |
| A/Indonesia/5/05  | A/PR/8/34         | 128                       | 128         | <2          |
| A/NL/213/03       | A/PR/8/34         | 128                       | <2          | 256         |

<sup>\*</sup> SA; sialic acids

Table S3

| Coll date                        | EpiFlu ID      | Name                          | Submitter |
|----------------------------------|----------------|-------------------------------|-----------|
| 1 2000_(Month_and_day_unknown)   | EPI_ISL_5634   | _A/Wellington/28/2000_        | —         |
| 2 2000_(Month_and_day_unknown)   | EPI_ISL_5695   | _A/Wellington/26/2000_        | —         |
| 3 2000_(Month_and_day_unknown)   | EPI_ISL_6224   | _A/New_South_Wales/25/2000_   | —         |
| 4 2000_(Month_and_day_unknown)   | EPI_ISL_6225   | _A/New_South_Wales/27/2000_   | —         |
| 5 2000_(Month_and_day_unknown)   | EPI_ISL_6226   | _A/New_South_Wales/28/2000_   | —         |
| 6 2000_(Month_and_day_unknown)   | EPI_ISL_6227   | _A/New_South_Wales/29/2000_   | —         |
| 7 2000_(Month_and_day_unknown)   | EPI_ISL_6228   | _A/New_South_Wales/36/2000_   | —         |
| 8 2000_(Month_and_day_unknown)   | EPI_ISL_6246   | _A/New_South_Wales/33/2000_   | —         |
| 9 2000_(Month_and_day_unknown)   | EPI_ISL_6355   | _A/New_South_Wales/32/2000_   | —         |
| 10 2000_(Month_and_day_unknown)  | EPI_ISL_6356   | _A/New_South_Wales/34/2000_   | —         |
| 11 2000_(Month_and_day_unknown)  | EPI_ISL_6357   | _A/New_South_Wales/35/2000_   | —         |
| 12 2000_(Month_and_day_unknown)  | EPI_ISL_6372   | _A/South_Australia/59/2000_   | —         |
| 13 2000_(Month_and_day_unknown)  | EPI_ISL_6373   | _A/South_Australia/62/2000_   | —         |
| 14 2000_(Month_and_day_unknown)  | EPI_ISL_6376   | _A/South_Australia/66/2000_   | —         |
| 15 2000_(Month_and_day_unknown)  | EPI_ISL_6377   | _A/South_Australia/67/2000_   | —         |
| 16 2000_(Month_and_day_unknown)  | EPI_ISL_6378   | _A/South_Australia/68/2000_   | —         |
| 17 2000_(Month_and_day_unknown)  | EPI_ISL_6379   | _A/South_Australia/71/2000_   | —         |
| 18 2000_(Month_and_day_unknown)  | EPI_ISL_6380   | _A/South_Australia/74/2000_   | —         |
| 19 2000_(Month_and_day_unknown)  | EPI_ISL_6429   | _A/South_Australia/52/2000_   | —         |
| 20 2000_(Month_and_day_unknown)  | EPI_ISL_6430   | _A/South_Australia/76/2000_   | —         |
| 21 2000_(Month_and_day_unknown)  | EPI_ISL_6457   | _A/South_Australia/75/2000_   | —         |
| 22 2000_(Month_and_day_unknown)  | EPI_ISL_6458   | _A/South_Australia/77/2000_   | —         |
| 23 2000_(Month_and_day_unknown)  | EPI_ISL_6508   | _A/South_Australia/2/2000_    | —         |
| 24 2000_(Month_and_day_unknown)  | EPI_ISL_6861   | _A/South_Australia/49/2000_   | —         |
| 25 2000_(Month_and_day_unknown)  | EPI_ISL_6862   | _A/South_Australia/80/2000_   | —         |
| 26 2000_(Month_and_day_unknown)  | EPI_ISL_6875   | _A/South_Australia/15/2000_   | —         |
| 27 2000_(Month_and_day_unknown)  | EPI_ISL_6886   | _A/Queensland/10/2000_        | —         |
| 28 2000_(Month_and_day_unknown)  | EPI_ISL_6907   | _A/Queensland/6/2000_         | —         |
| 29 2000_(Month_and_day_unknown)  | EPI_ISL_7053   | _A/South_Australia/11/2000_   | —         |
| 30 2000_(Month_and_day_unknown)  | EPI_ISL_7057   | _A/South_Australia/72/2000_   | —         |
| 31 2000_(Month_and_day_unknown)  | EPI_ISL_7058   | _A/South_Australia/81/2000_   | —         |
| 32 2000_(Month_and_day_unknown)  | EPI_ISL_7074   | _A/South_Australia/16/2000_   | —         |
| 33 2000_(Month_and_day_unknown)  | EPI_ISL_7075   | _A/South_Australia/47/2000_   | —         |
| 34 2000_(Month_and_day_unknown)  | EPI_ISL_7078   | _A/South_Australia/73/2000_   | —         |
| 35 2000_(Month_and_day_unknown)  | EPI_ISL_127600 | _A/Ulan_Ude/01/2000_          | EpiFluDB_ |
| 36 2000-01-03                    | EPI_ISL_5074   | _A/New_York/169/2000_         | —         |
| 37 2000-01-03                    | EPI_ISL_6662   | _A/New_York/160/2000_         | —         |
| 38 2000-01-03                    | EPI_ISL_8638   | _A/New_York/431/2000_         | —         |
| 39 2000-01-03                    | EPI_ISL_8663   | _A/New_York/430/2000_         | —         |
| 40 2000-01-04                    | EPI_ISL_5079   | _A/New_York/174/2000_         | —         |
| 41 2000-01-05                    | EPI_ISL_5075   | _A/New_York/170/2000_         | —         |
| 42 2000-01-05                    | EPI_ISL_6711   | _A/New_York/156/2000_         | —         |
| 43 2000-01-05                    | EPI_ISL_8639   | _A/New_York/433/2000_         | —         |
| 44 2000-01-05                    | EPI_ISL_8709   | _A/New_York/432/2000_         | —         |
| 45 2000-01-06                    | EPI_ISL_5080   | _A/New_York/175/2000_         | —         |
| 46 2000-01-06                    | EPI_ISL_115621 | _A/Netherlands/3/2000_        | EpiFluDB_ |
| 47 2000-01-09                    | EPI_ISL_8640   | _A/New_York/434/2000_         | —         |
| 48 2000-01-09                    | EPI_ISL_9026   | _A/New_York/435/2000_         | —         |
| 49 2000-01-10                    | EPI_ISL_8641   | _A/New_York/436/2000_         | —         |
| 50 2000-01-12                    | EPI_ISL_8642   | _A/New_York/437/2000_         | —         |
| 51 2000-01-18                    | EPI_ISL_6664   | _A/New_York/165/2000_         | —         |
| 52 2000-01-18                    | EPI_ISL_8643   | _A/New_York/438/2000_         | —         |
| 53 2000-01-21                    | EPI_ISL_5535   | _A/Dunedin/1/2000_            | —         |
| 54 2000-01-23                    | EPI_ISL_8664   | _A/New_York/439/2000_         | —         |
| 55 2000-01-24                    | EPI_ISL_5068   | _A/New_York/154/2000_         | —         |
| 56 2000-01-24                    | EPI_ISL_8710   | _A/New_York/440/2000_         | —         |
| 57 2000-01-28                    | EPI_ISL_5050   | _A/New_York/150/2000_         | —         |
| 58 2000-02-02                    | EPI_ISL_5078   | _A/New_York/173/2000_         | —         |
| 59 2000-02-06                    | EPI_ISL_6726   | _A/New_York/142/2000_         | —         |
| 60 2000-02-07                    | EPI_ISL_90470  | _A/Missouri/NHRC0001/2000_    | EpiFluDB_ |
| 61 2000-02-09                    | EPI_ISL_6633   | _A/New_York/180/2000_         | —         |
| 62 2000-02-09                    | EPI_ISL_6693   | _A/New_York/162/2000_         | —         |
| 63 2000-02-12                    | EPI_ISL_7539   | _A/Auckland/583/2000_         | —         |
| 64 2000-03-01                    | EPI_ISL_5081   | _A/New_York/176/2000_         | —         |
| 65 2000-05-05                    | EPI_ISL_5111   | _A/Canterbury/3/2000_         | —         |
| 66 2000-05-06                    | EPI_ISL_7281   | _A/Auckland/600/2000_         | —         |
| 67 2000-07-16                    | EPI_ISL_6464   | _A/Queensland/2/2000_         | —         |
| 68 2000-08-02                    | EPI_ISL_6857   | _A/Canterbury/50/2000_        | —         |
| 69 2000-08-13                    | EPI_ISL_6466   | _A/Queensland/5/2000_         | —         |
| 70 2000-08-25                    | EPI_ISL_9210   | _A/Canterbury/42/2000_        | —         |
| 71 2000-08-27                    | EPI_ISL_9211   | _A/Canterbury/39/2000_        | —         |
| 72 2000-08-28                    | EPI_ISL_5536   | _A/Waikato/4/2000_            | —         |
| 73 2000-08-28                    | EPI_ISL_6468   | _A/Queensland/9/2000_         | —         |
| 74 2000-08-30                    | EPI_ISL_5454   | _A/Waikato/5/2000_            | —         |
| 75 2000-09-04                    | EPI_ISL_6465   | _A/Queensland/3/2000_         | —         |
| 76 2000-09-05                    | EPI_ISL_6442   | _A/Queensland/4/2000_         | —         |
| 77 2000-09-08                    | EPI_ISL_5537   | _A/Waikato/7/2000_            | —         |
| 78 2000-09-08                    | EPI_ISL_5589   | _A/Waikato/6/2000_            | —         |
| 79 2000-09-11                    | EPI_ISL_6451   | _A/Western_Australia/7/2000_  | —         |
| 80 2000-09-11                    | EPI_ISL_7282   | _A/Auckland/601/2000_         | —         |
| 81 2000-09-12                    | EPI_ISL_6170   | _A/Western_Australia/3/2000_  | —         |
| 82 2000-09-12                    | EPI_ISL_6449   | _A/Western_Australia/1/2000_  | —         |
| 83 2000-09-15                    | EPI_ISL_6441   | _A/Queensland/1/2000_         | —         |
| 84 2000-09-19                    | EPI_ISL_6518   | _A/Queensland/7/2000_         | —         |
| 85 2000-09-19                    | EPI_ISL_6858   | _A/Wellington/21/2000_        | —         |
| 86 2000-09-20                    | EPI_ISL_6169   | _A/Western_Australia/2/2000_  | —         |
| 87 2000-09-20                    | EPI_ISL_6467   | _A/Queensland/8/2000_         | —         |
| 88 2000-09-20                    | EPI_ISL_7113   | _A/Western_Australia/4/2000_  | —         |
| 89 2000-09-22                    | EPI_ISL_5633   | _A/Waikato/17/2000_           | —         |
| 90 2000-09-22                    | EPI_ISL_7280   | _A/Auckland/599/2000_         | —         |
| 91 2000-09-25                    | EPI_ISL_6450   | _A/Western_Australia/5/2000_  | —         |
| 92 2000-09-25                    | EPI_ISL_7144   | _A/Auckland/588/2000_         | —         |
| 93 2000-09-27                    | EPI_ISL_5632   | _A/Waikato/16/2000_           | —         |
| 94 2000-09-28                    | EPI_ISL_7276   | _A/Auckland/589/2000_         | —         |
| 95 2000-10-02                    | EPI_ISL_9256   | _A/Canterbury/88/2000_        | —         |
| 96 2000-10-08                    | EPI_ISL_6452   | _A/Western_Australia/9/2000_  | —         |
| 97 2000-10-09                    | EPI_ISL_7146   | _A/Auckland/593/2000_         | —         |
| 98 2000-10-09                    | EPI_ISL_7542   | _A/Auckland/598/2000_         | —         |
| 99 2000-10-11                    | EPI_ISL_6346   | _A/Western_Australia/12/2000_ | —         |
| 100 2000-10-14                   | EPI_ISL_6172   | _A/Western_Australia/11/2000_ | —         |
| 101 2000-10-17                   | EPI_ISL_6171   | _A/Western_Australia/8/2000_  | —         |
| 102 2000-10-19                   | EPI_ISL_6345   | _A/Western_Australia/10/2000_ | —         |
| 103 2000-10-25                   | EPI_ISL_5512   | _A/Canterbury/97/2000_        | —         |
| 104 2000-10-27                   | EPI_ISL_9257   | _A/Canterbury/99/2000_        | —         |
| 105 2000-10-30                   | EPI_ISL_7279   | _A/Auckland/596/2000_         | —         |
| 106 2000-11-25                   | EPI_ISL_5696   | _A/Wellington/30/2000_        | —         |
| 107 2001_(Month_and_day_unknown) | EPI_ISL_116066 | _A/Hanoi/1766/2001_           | EpiFluDB_ |
| 108 2001-01-21                   | EPI_ISL_8595   | _A/New_York/301/2001_         | —         |
| 109 2001-03-20                   | EPI_ISL_115622 | _A/Netherlands/124/2001_      | EpiFluDB_ |
| 110 2001-03-21                   | EPI_ISL_115623 | _A/Netherlands/126/2001_      | EpiFluDB_ |
| 111 2001-07-09                   | EPI_ISL_5412   | _A/Wellington/22/2001_        | —         |
| 112 2001-07-11                   | EPI_ISL_6173   | _A/Western_Australia/13/2001_ | —         |
| 113 2001-07-14                   | EPI_ISL_6519   | _A/Queensland/19/2001_        | —         |
| 114 2001-08-05                   | EPI_ISL_6473   | _A/Queensland/20/2001_        | —         |
| 115 2001-08-06                   | EPI_ISL_5198   | _A/Canterbury/146/2001_       | —         |
| 116 2001-08-11                   | EPI_ISL_6469   | _A/Queensland/11/2001_        | —         |
| 117 2001-08-15                   | EPI_ISL_7104   | _A/Auckland/607/2001_         | —         |

|     |                               |                  |                               |           |
|-----|-------------------------------|------------------|-------------------------------|-----------|
| 118 | 2001-08-17_                   | _EPI_ISL_6471_   | _A/Queensland/16/2001_        | ---       |
| 119 | 2001-08-19_                   | _EPI_ISL_7147_   | _A/Auckland/602/2001_         | ---       |
| 120 | 2001-08-24_                   | _EPI_ISL_6470_   | _A/Queensland/12/2001_        | ---       |
| 121 | 2001-08-24_                   | _EPI_ISL_6472_   | _A/Queensland/18/2001_        | ---       |
| 122 | 2001-08-24_                   | _EPI_ISL_6486_   | _A/Queensland/17/2001_        | ---       |
| 123 | 2001-08-28_                   | _EPI_ISL_5497_   | _A/Wellington/34/2001_        | ---       |
| 124 | 2001-09-03_                   | _EPI_ISL_6756_   | _A/Queensland/14/2001_        | ---       |
| 125 | 2001-09-13_                   | _EPI_ISL_5498_   | _A/Waikato/105/2001_          | ---       |
| 126 | 2001-09-13_                   | _EPI_ISL_5610_   | _A/Western_Australia/15/2001_ | ---       |
| 127 | 2001-09-13_                   | _EPI_ISL_20944_  | _A/Western_Australia/15/2001_ | ---       |
| 128 | 2001-09-25_                   | _EPI_ISL_6175_   | _A/Western_Australia/16/2001_ | ---       |
| 129 | 2001-09-26_                   | _EPI_ISL_6174_   | _A/Western_Australia/14/2001_ | ---       |
| 130 | 2001-09-28_                   | _EPI_ISL_7284_   | _A/Auckland/604/2001_         | ---       |
| 131 | 2001-10-02_                   | _EPI_ISL_6176_   | _A/Western_Australia/17/2001_ | ---       |
| 132 | 2001-10-02_                   | _EPI_ISL_15045_  | _A/Auckland/603/2001_         | ---       |
| 133 | 2001-11-21_                   | _EPI_ISL_8618_   | _A/New_York/401/2001_         | ---       |
| 134 | 2001-11-22_                   | _EPI_ISL_5052_   | _A/New_York/71/2001_          | ---       |
| 135 | 2001-12-15_                   | _EPI_ISL_5015_   | _A/New_York/83/2001_          | ---       |
| 136 | 2001-12-23_                   | _EPI_ISL_5032_   | _A/New_York/131/2001_         | ---       |
| 137 | 2001-12-25_                   | _EPI_ISL_6684_   | _A/New_York/94/2001_          | ---       |
| 138 | 2001-12-26_                   | _EPI_ISL_5063_   | _A/New_York/80/2001_          | ---       |
| 139 | 2001-12-26_                   | _EPI_ISL_8226_   | _A/New_York/77/2001_          | ---       |
| 140 | 2001-12-27_                   | _EPI_ISL_8619_   | _A/New_York/402/2001_         | ---       |
| 141 | 2001-12-29_                   | _EPI_ISL_5017_   | _A/New_York/84/2001_          | ---       |
| 142 | 2001-12-29_                   | _EPI_ISL_6751_   | _A/New_York/273/2001_         | ---       |
| 143 | 2001-12-31_                   | _EPI_ISL_5040_   | _A/New_York/85/2001_          | ---       |
| 144 | 2001-12-31_                   | _EPI_ISL_5064_   | _A/New_York/127/2001_         | ---       |
| 145 | 2002_(Month_and_day_unknown)_ | _EPI_ISL_5500_   | _A/Wellington/63/2002_        | ---       |
| 146 | 2002_(Month_and_day_unknown)_ | _EPI_ISL_5593_   | _A/Wellington/9/2002_         | ---       |
| 147 | 2002_(Month_and_day_unknown)_ | _EPI_ISL_10112_  | _A/TW/872/02_                 | ---       |
| 148 | 2002_(Month_and_day_unknown)_ | _EPI_ISL_10113_  | _A/TW/3446/02_                | ---       |
| 149 | 2002_(Month_and_day_unknown)_ | _EPI_ISL_10114_  | _A/TW/3565/02_                | ---       |
| 150 | 2002_(Month_and_day_unknown)_ | _EPI_ISL_107711_ | _A/Fujian/411/2002_           | EpiFluDB_ |
| 151 | 2002-01-04_                   | _EPI_ISL_5047_   | _A/New_York/134/2002_         | ---       |
| 152 | 2002-01-04_                   | _EPI_ISL_8202_   | _A/New_York/275/2002_         | ---       |
| 153 | 2002-01-04_                   | _EPI_ISL_8620_   | _A/New_York/403/2002_         | ---       |
| 154 | 2002-01-05_                   | _EPI_ISL_8621_   | _A/New_York/404/2002_         | ---       |
| 155 | 2002-01-08_                   | _EPI_ISL_8623_   | _A/New_York/406/2002_         | ---       |
| 156 | 2002-01-08_                   | _EPI_ISL_8660_   | _A/New_York/407/2002_         | ---       |
| 157 | 2002-01-09_                   | _EPI_ISL_90493_  | _A/Missouri/NHRC0001/2002_    | EpiFluDB_ |
| 158 | 2002-01-11_                   | _EPI_ISL_8624_   | _A/New_York/408/2002_         | ---       |
| 159 | 2002-01-14_                   | _EPI_ISL_7107_   | _A/Auckland/614/2002_         | ---       |
| 160 | 2002-01-14_                   | _EPI_ISL_8625_   | _A/New_York/409/2002_         | ---       |
| 161 | 2002-01-15_                   | _EPI_ISL_8626_   | _A/New_York/410/2002_         | ---       |
| 162 | 2002-01-16_                   | _EPI_ISL_6681_   | _A/New_York/107/2002_         | ---       |
| 163 | 2002-01-16_                   | _EPI_ISL_8633_   | _A/New_York/418/2002_         | ---       |
| 164 | 2002-01-17_                   | _EPI_ISL_5018_   | _A/New_York/91/2002_          | ---       |
| 165 | 2002-01-18_                   | _EPI_ISL_5028_   | _A/New_York/92/2002_          | ---       |
| 166 | 2002-01-18_                   | _EPI_ISL_8634_   | _A/New_York/419/2002_         | ---       |
| 167 | 2002-01-19_                   | _EPI_ISL_6682_   | _A/New_York/74/2002_          | ---       |
| 168 | 2002-01-20_                   | _EPI_ISL_5053_   | _A/New_York/106/2002_         | ---       |
| 169 | 2002-01-22_                   | _EPI_ISL_5020_   | _A/New_York/100/2002_         | ---       |
| 170 | 2002-01-22_                   | _EPI_ISL_8627_   | _A/New_York/411/2002_         | ---       |
| 171 | 2002-01-22_                   | _EPI_ISL_90494_  | _A/Texas/NHRC0001/2002_       | EpiFluDB_ |
| 172 | 2002-01-23_                   | _EPI_ISL_6674_   | _A/New_York/99/2002_          | ---       |
| 173 | 2002-01-23_                   | _EPI_ISL_6702_   | _A/New_York/102/2002_         | ---       |
| 174 | 2002-01-25_                   | _EPI_ISL_5044_   | _A/New_York/103/2002_         | ---       |
| 175 | 2002-01-25_                   | _EPI_ISL_5045_   | _A/New_York/128/2002_         | ---       |
| 176 | 2002-01-27_                   | _EPI_ISL_5046_   | _A/New_York/132/2002_         | ---       |
| 177 | 2002-01-28_                   | _EPI_ISL_8704_   | _A/New_York/420/2002_         | ---       |
| 178 | 2002-01-29_                   | _EPI_ISL_5006_   | _A/New_York/110/2002_         | ---       |
| 179 | 2002-01-29_                   | _EPI_ISL_6657_   | _A/New_York/119/2002_         | ---       |
| 180 | 2002-01-30_                   | _EPI_ISL_5058_   | _A/New_York/109/2002_         | ---       |
| 181 | 2002-01-30_                   | _EPI_ISL_5061_   | _A/New_York/116/2002_         | ---       |
| 182 | 2002-01-30_                   | _EPI_ISL_6704_   | _A/New_York/118/2002_         | ---       |
| 183 | 2002-01-31_                   | _EPI_ISL_5021_   | _A/New_York/113/2002_         | ---       |
| 184 | 2002-01-31_                   | _EPI_ISL_5054_   | _A/New_York/108/2002_         | ---       |
| 185 | 2002-02-01_                   | _EPI_ISL_5684_   | _A/New_York/CA/2002_          | ---       |
| 186 | 2002-02-01_                   | _EPI_ISL_6640_   | _A/New_York/117/2002_         | ---       |
| 187 | 2002-02-01_                   | _EPI_ISL_8628_   | _A/New_York/412/2002_         | ---       |
| 188 | 2002-02-02_                   | _EPI_ISL_90495_  | _A/Georgia/NHRC0001/2002_     | EpiFluDB_ |
| 189 | 2002-02-04_                   | _EPI_ISL_6656_   | _A/New_York/111/2002_         | ---       |
| 190 | 2002-02-04_                   | _EPI_ISL_6676_   | _A/New_York/101/2002_         | ---       |
| 191 | 2002-02-05_                   | _EPI_ISL_6679_   | _A/New_York/105/2002_         | ---       |
| 192 | 2002-02-06_                   | _EPI_ISL_5033_   | _A/New_York/133/2002_         | ---       |
| 193 | 2002-02-07_                   | _EPI_ISL_5060_   | _A/New_York/115/2002_         | ---       |
| 194 | 2002-02-08_                   | _EPI_ISL_8629_   | _A/New_York/413/2002_         | ---       |
| 195 | 2002-02-12_                   | _EPI_ISL_5031_   | _A/New_York/129/2002_         | ---       |
| 196 | 2002-02-12_                   | _EPI_ISL_6700_   | _A/New_York/75/2002_          | ---       |
| 197 | 2002-02-12_                   | _EPI_ISL_8630_   | _A/New_York/414/2002_         | ---       |
| 198 | 2002-02-13_                   | _EPI_ISL_6701_   | _A/New_York/97/2002_          | ---       |
| 199 | 2002-02-13_                   | _EPI_ISL_90471_  | _A/Illinois/NHRC0001/2002_    | EpiFluDB_ |
| 200 | 2002-02-14_                   | _EPI_ISL_5034_   | _A/New_York/135/2002_         | ---       |
| 201 | 2002-02-19_                   | _EPI_ISL_5070_   | _A/New_York/120/2002_         | ---       |
| 202 | 2002-02-19_                   | _EPI_ISL_6695_   | _A/New_York/81/2002_          | ---       |
| 203 | 2002-02-22_                   | _EPI_ISL_8631_   | _A/New_York/415/2002_         | ---       |
| 204 | 2002-02-26_                   | _EPI_ISL_5019_   | _A/New_York/95/2002_          | ---       |
| 205 | 2002-02-26_                   | _EPI_ISL_5022_   | _A/New_York/121/2002_         | ---       |
| 206 | 2002-02-26_                   | _EPI_ISL_6752_   | _A/New_York/274/2002_         | ---       |
| 207 | 2002-02-26_                   | _EPI_ISL_115624_ | _A/Netherlands/120/2002_      | EpiFluDB_ |
| 208 | 2002-02-28_                   | _EPI_ISL_8632_   | _A/New_York/416/2002_         | ---       |
| 209 | 2002-03-01_                   | _EPI_ISL_5027_   | _A/New_York/86/2002_          | ---       |
| 210 | 2002-03-04_                   | _EPI_ISL_7285_   | _A/Auckland/615/2002_         | ---       |
| 211 | 2002-03-05_                   | _EPI_ISL_5059_   | _A/New_York/114/2002_         | ---       |
| 212 | 2002-03-07_                   | _EPI_ISL_8154_   | _A/New_York/276/2002_         | ---       |
| 213 | 2002-03-11_                   | _EPI_ISL_5065_   | _A/New_York/130/2002_         | ---       |
| 214 | 2002-03-21_                   | _EPI_ISL_6687_   | _A/New_York/122/2002_         | ---       |
| 215 | 2002-04-12_                   | _EPI_ISL_9194_   | _A/Canterbury/04/2002_        | ---       |
| 216 | 2002-04-13_                   | _EPI_ISL_9144_   | _A/Canterbury/05/2002_        | ---       |
| 217 | 2002-04-19_                   | _EPI_ISL_9195_   | _A/Canterbury/13/2002_        | ---       |
| 218 | 2002-04-24_                   | _EPI_ISL_9228_   | _A/Canterbury/10/2002_        | ---       |
| 219 | 2002-04-26_                   | _EPI_ISL_9142_   | _A/Canterbury/01/2002_        | ---       |
| 220 | 2002-04-29_                   | _EPI_ISL_9143_   | _A/Canterbury/02/2002_        | ---       |
| 221 | 2002-05-04_                   | _EPI_ISL_9150_   | _A/Canterbury/16/2002_        | ---       |
| 222 | 2002-05-06_                   | _EPI_ISL_9151_   | _A/Canterbury/18/2002_        | ---       |
| 223 | 2002-05-07_                   | _EPI_ISL_9196_   | _A/Canterbury/21/2002_        | ---       |
| 224 | 2002-05-10_                   | _EPI_ISL_9152_   | _A/Canterbury/22/2002_        | ---       |
| 225 | 2002-05-23_                   | _EPI_ISL_9167_   | _A/Canterbury/102/2002_       | ---       |
| 226 | 2002-06-07_                   | _EPI_ISL_6157_   | _A/Dunedin/1/2002_            | ---       |
| 227 | 2002-06-07_                   | _EPI_ISL_9157_   | _A/Canterbury/49/2002_        | ---       |
| 228 | 2002-06-08_                   | _EPI_ISL_7150_   | _A/Auckland/608/2002_         | ---       |
| 229 | 2002-06-08_                   | _EPI_ISL_9155_   | _A/Canterbury/47/2002_        | ---       |
| 230 | 2002-06-09_                   | _EPI_ISL_9156_   | _A/Canterbury/48/2002_        | ---       |
| 231 | 2002-06-09_                   | _EPI_ISL_9197_   | _A/Canterbury/46/2002_        | ---       |
| 232 | 2002-06-10_                   | _EPI_ISL_9154_   | _A/Canterbury/41/2002_        | ---       |
| 233 | 2002-06-10_                   | _EPI_ISL_9159_   | _A/Canterbury/53/2002_        | ---       |
| 234 | 2002-06-11_                   | _EPI_ISL_9158_   | _A/Canterbury/50/2002_        | ---       |
| 235 | 2002-06-13_                   | _EPI_ISL_9153_   | _A/Canterbury/35/2002_        | ---       |
| 236 | 2002-06-18_                   | _EPI_ISL_7151_   | _A/Auckland/609/2002_         | ---       |
| 237 | 2002-06-20_                   | _EPI_ISL_9179_   | _A/Canterbury/31/2002_        | ---       |
| 238 | 2002-06-25_                   | _EPI_ISL_5611_   | _A/Western_Australia/23/2002_ | ---       |

|     |                               |                  |                               |                 |
|-----|-------------------------------|------------------|-------------------------------|-----------------|
| 239 | 2002-06-25_                   | _EPI_ISL_6453_   | _A/Western_Australia/24/2002_ | ___             |
| 240 | 2002-06-25_                   | _EPI_ISL_9160_   | _A/Canterbury/56/2002_        | ___             |
| 241 | 2002-06-25_                   | _EPI_ISL_9184_   | _A/Canterbury/58/2002_        | ___             |
| 242 | 2002-06-27_                   | _EPI_ISL_9198_   | _A/Canterbury/57/2002_        | ___             |
| 243 | 2002-06-30_                   | _EPI_ISL_9231_   | _A/Canterbury/61/2002_        | ___             |
| 244 | 2002-07-01_                   | _EPI_ISL_5416_   | _A/Waikato/21/2002_           | ___             |
| 245 | 2002-07-02_                   | _EPI_ISL_9161_   | _A/Canterbury/59/2002_        | ___             |
| 246 | 2002-07-03_                   | _EPI_ISL_5415_   | _A/Wellington/66/2002_        | ___             |
| 247 | 2002-07-03_                   | _EPI_ISL_6158_   | _A/Waikato/23/2002_           | ___             |
| 248 | 2002-07-05_                   | _EPI_ISL_9162_   | _A/Canterbury/68/2002_        | ___             |
| 249 | 2002-07-06_                   | _EPI_ISL_9163_   | _A/Canterbury/69/2002_        | ___             |
| 250 | 2002-07-06_                   | _EPI_ISL_9186_   | _A/Canterbury/72/2002_        | ___             |
| 251 | 2002-07-08_                   | _EPI_ISL_6178_   | _A/Western_Australia/26/2002_ | ___             |
| 252 | 2002-07-09_                   | _EPI_ISL_9166_   | _A/Canterbury/81/2002_        | ___             |
| 253 | 2002-07-09_                   | _EPI_ISL_9187_   | _A/Canterbury/79/2002_        | ___             |
| 254 | 2002-07-10_                   | _EPI_ISL_6177_   | _A/Western_Australia/25/2002_ | ___             |
| 255 | 2002-07-11_                   | _EPI_ISL_9164_   | _A/Canterbury/75/2002_        | ___             |
| 256 | 2002-07-11_                   | _EPI_ISL_9165_   | _A/Canterbury/80/2002_        | ___             |
| 257 | 2002-07-15_                   | _EPI_ISL_6520_   | _A/Queensland/22/2002_        | ___             |
| 258 | 2002-07-18_                   | _EPI_ISL_5594_   | _A/Waikato/25/2002_           | ___             |
| 259 | 2002-07-21_                   | _EPI_ISL_6419_   | _A/Western_Australia/27/2002_ | ___             |
| 260 | 2002-07-23_                   | _EPI_ISL_5595_   | _A/Waikato/36/2002_           | ___             |
| 261 | 2002-07-23_                   | _EPI_ISL_5636_   | _A/Dunedin/12/2002_           | ___             |
| 262 | 2002-07-25_                   | _EPI_ISL_6476_   | _A/Queensland/24/2002_        | ___             |
| 263 | 2002-07-26_                   | _EPI_ISL_5635_   | _A/Waikato/31/2002_           | ___             |
| 264 | 2002-07-26_                   | _EPI_ISL_6474_   | _A/Queensland/21/2002_        | ___             |
| 265 | 2002-07-29_                   | _EPI_ISL_7543_   | _A/Auckland/610/2002_         | ___             |
| 266 | 2002-08-01_                   | _EPI_ISL_7106_   | _A/Auckland/613/2002_         | ___             |
| 267 | 2002-08-06_                   | _EPI_ISL_6179_   | _A/Western_Australia/28/2002_ | ___             |
| 268 | 2002-08-06_                   | _EPI_ISL_6477_   | _A/Queensland/26/2002_        | ___             |
| 269 | 2002-08-12_                   | _EPI_ISL_5466_   | _A/Waikato/51/2002_           | ___             |
| 270 | 2002-08-12_                   | _EPI_ISL_6522_   | _A/Queensland/28/2002_        | ___             |
| 271 | 2002-08-13_                   | _EPI_ISL_6475_   | _A/Queensland/23/2002_        | ___             |
| 272 | 2002-08-13_                   | _EPI_ISL_6521_   | _A/Queensland/27/2002_        | ___             |
| 273 | 2002-08-14_                   | _EPI_ISL_7152_   | _A/Auckland/612/2002_         | ___             |
| 274 | 2002-08-17_                   | _EPI_ISL_6523_   | _A/Queensland/29/2002_        | ___             |
| 275 | 2002-08-19_                   | _EPI_ISL_6181_   | _A/Western_Australia/30/2002_ | ___             |
| 276 | 2002-08-21_                   | _EPI_ISL_6180_   | _A/Western_Australia/29/2002_ | ___             |
| 277 | 2002-08-23_                   | _EPI_ISL_6757_   | _A/Queensland/30/2002_        | ___             |
| 278 | 2002-08-26_                   | _EPI_ISL_6182_   | _A/Western_Australia/31/2002_ | ___             |
| 279 | 2002-08-26_                   | _EPI_ISL_6420_   | _A/Western_Australia/32/2002_ | ___             |
| 280 | 2002-08-28_                   | _EPI_ISL_6852_   | _A/Western_Australia/34/2002_ | ___             |
| 281 | 2002-09-09_                   | _EPI_ISL_7105_   | _A/Auckland/611/2002_         | ___             |
| 282 | 2002-09-29_                   | _EPI_ISL_6183_   | _A/Western_Australia/35/2002_ | ___             |
| 283 | 2002-10-15_                   | _EPI_ISL_6184_   | _A/Western_Australia/36/2002_ | ___             |
| 284 | 2002-11-18_                   | _EPI_ISL_120364_ | _A/Malaysia/23606/2002_       | EpiFluDB_       |
| 285 | 2002-12-02_                   | _EPI_ISL_28851_  | _A/Genoa/1/2002_              | ___             |
| 286 | 2003_(Month_and_day_unknown)_ | _EPI_ISL_3767_   | _A/Wyoming/03/2003_           | ___             |
| 287 | 2003_(Month_and_day_unknown)_ | _EPI_ISL_5008_   | _A/New_York/16/2003_          | ___             |
| 288 | 2003_(Month_and_day_unknown)_ | _EPI_ISL_10115_  | _A/TW/229/03_                 | ___             |
| 289 | 2003_(Month_and_day_unknown)_ | _EPI_ISL_10116_  | _A/TW/3286/03_                | ___             |
| 290 | 2003_(Month_and_day_unknown)_ | _EPI_ISL_3767_   | _A/Wyoming/03/2003_           | ___             |
| 291 | 2003_(Month_and_day_unknown)_ | _EPI_ISL_3767_   | _A/Wyoming/03/2003_           | ___             |
| 292 | 2003_(Month_and_day_unknown)_ | _EPI_ISL_115625_ | _A/Finland/170/2003_          | EpiFluDB_       |
| 293 | 2003_(Month_and_day_unknown)_ | _EPI_ISL_127602_ | _A/Fujian/445/2003_           | EpiFluDB_       |
| 294 | 2003_(Month_and_day_unknown)_ | _EPI_ISL_132413_ | _A/Mexico/InDRE2601/2003_     | EpiFluDB_       |
| 295 | 2003_(Month_and_day_unknown)_ | _EPI_ISL_132418_ | _A/Mexico/InDRE940/2003_      | EpiFluDB_       |
| 296 | 2003-01-20_                   | _EPI_ISL_8692_   | _A/New_York/485/2003_         | ___             |
| 297 | 2003-02-04_                   | _EPI_ISL_6635_   | _A/New_York/192/2003_         | ___             |
| 298 | 2003-02-04_                   | _EPI_ISL_132416_ | _A/Mexico/InDRE756/2003_      | EpiFluDB_       |
| 299 | 2003-02-13_                   | _EPI_ISL_139914_ | _A/Wyoming/03/2003_           | Garten_Rebecca_ |
| 300 | 2003-02-13_                   | _EPI_ISL_153570_ | _A/Wyoming/03/2003_           | Garten_Rebecca_ |
| 301 | 2003-02-19_                   | _EPI_ISL_6649_   | _A/New_York/193/2003_         | ___             |
| 302 | 2003-03-05_                   | _EPI_ISL_110691_ | _A/Netherlands/88/2003_       | EpiFluDB_       |
| 303 | 2003-03-08_                   | _EPI_ISL_6666_   | _A/New_York/198/2003_         | ___             |
| 304 | 2003-03-19_                   | _EPI_ISL_20810_  | _A/Yucatan/844/2003_          | ___             |
| 305 | 2003-03-20_                   | _EPI_ISL_20811_  | _A/Yucatan/ME6057/2003_       | ___             |
| 306 | 2003-04-05_                   | _EPI_ISL_6683_   | _A/New_York/202/2003_         | ___             |
| 307 | 2003-04-14_                   | _EPI_ISL_113061_ | _A/Netherlands/222/2003_      | EpiFluDB_       |
| 308 | 2003-04-20_                   | _EPI_ISL_84455_  | _A/Netherlands/213/2003_      | EpiFluDB_       |
| 309 | 2003-04-20_                   | _EPI_ISL_110692_ | _A/Netherlands/217/2003_      | EpiFluDB_       |
| 310 | 2003-04-22_                   | _EPI_ISL_6712_   | _A/New_York/213/2003_         | ___             |
| 311 | 2003-04-22_                   | _EPI_ISL_6730_   | _A/New_York/215/2003_         | ___             |
| 312 | 2003-06-16_                   | _EPI_ISL_5637_   | _A/Waikato/15/2003_           | ___             |
| 313 | 2003-06-16_                   | _EPI_ISL_9066_   | _A/Canterbury/393/2003_       | ___             |
| 314 | 2003-06-16_                   | _EPI_ISL_117091_ | _A/HaNoi/BM766/2003_          | EpiFluDB_       |
| 315 | 2003-06-16_                   | _EPI_ISL_117093_ | _A/HaNoi/BM767/2003_          | EpiFluDB_       |
| 316 | 2003-06-21_                   | _EPI_ISL_5597_   | _A/Waikato/21/2003_           | ___             |
| 317 | 2003-06-22_                   | _EPI_ISL_5501_   | _A/Waikato/155/2003_          | ___             |
| 318 | 2003-06-23_                   | _EPI_ISL_5503_   | _A/Waikato/29/2003_           | ___             |
| 319 | 2003-06-24_                   | _EPI_ISL_5598_   | _A/Waikato/46/2003_           | ___             |
| 320 | 2003-06-25_                   | _EPI_ISL_5506_   | _A/Waikato/122/2003_          | ___             |
| 321 | 2003-06-27_                   | _EPI_ISL_5601_   | _A/Waikato/94/2003_           | ___             |
| 322 | 2003-06-28_                   | _EPI_ISL_5469_   | _A/Waikato/91/2003_           | ___             |
| 323 | 2003-06-30_                   | _EPI_ISL_5429_   | _A/Waikato/61/2003_           | ___             |
| 324 | 2003-06-30_                   | _EPI_ISL_5467_   | _A/Wellington/34/2003_        | ___             |
| 325 | 2003-06-30_                   | _EPI_ISL_9067_   | _A/Canterbury/394/2003_       | ___             |
| 326 | 2003-07-01_                   | _EPI_ISL_90503_  | _A/Australia/NHRC0001/2003_   | EpiFluDB_       |
| 327 | 2003-07-01_                   | _EPI_ISL_90517_  | _A/Australia/NHRC0003/2003_   | EpiFluDB_       |
| 328 | 2003-07-01_                   | _EPI_ISL_90518_  | _A/Australia/NHRC0002/2003_   | EpiFluDB_       |
| 329 | 2003-07-02_                   | _EPI_ISL_5430_   | _A/Waikato/75/2003_           | ___             |
| 330 | 2003-07-02_                   | _EPI_ISL_5599_   | _A/Waikato/53/2003_           | ___             |
| 331 | 2003-07-02_                   | _EPI_ISL_90504_  | _A/Australia/NHRC0004/2003_   | EpiFluDB_       |
| 332 | 2003-07-03_                   | _EPI_ISL_5600_   | _A/Waikato/54/2003_           | ___             |
| 333 | 2003-07-04_                   | _EPI_ISL_132417_ | _A/Mexico/InDRE835/2003_      | EpiFluDB_       |
| 334 | 2003-07-05_                   | _EPI_ISL_9073_   | _A/Canterbury/403/2003_       | ___             |
| 335 | 2003-07-05_                   | _EPI_ISL_9074_   | _A/Canterbury/404/2003_       | ___             |
| 336 | 2003-07-05_                   | _EPI_ISL_9075_   | _A/Canterbury/405/2003_       | ___             |
| 337 | 2003-07-05_                   | _EPI_ISL_9076_   | _A/Canterbury/406/2003_       | ___             |
| 338 | 2003-07-06_                   | _EPI_ISL_5504_   | _A/Waikato/115/2003_          | ___             |
| 339 | 2003-07-06_                   | _EPI_ISL_9078_   | _A/Canterbury/410/2003_       | ___             |
| 340 | 2003-07-06_                   | _EPI_ISL_9171_   | _A/Canterbury/409/2003_       | ___             |
| 341 | 2003-07-07_                   | _EPI_ISL_5540_   | _A/Wellington/47/2003_        | ___             |
| 342 | 2003-07-07_                   | _EPI_ISL_5638_   | _A/Waikato/108/2003_          | ___             |
| 343 | 2003-07-07_                   | _EPI_ISL_90505_  | _A/Australia/NHRC0007/2003_   | EpiFluDB_       |
| 344 | 2003-07-07_                   | _EPI_ISL_90516_  | _A/Australia/NHRC0006/2003_   | EpiFluDB_       |
| 345 | 2003-07-08_                   | _EPI_ISL_5431_   | _A/Waikato/120/2003_          | ___             |
| 346 | 2003-07-08_                   | _EPI_ISL_5470_   | _A/Waikato/102/2003_          | ___             |
| 347 | 2003-07-08_                   | _EPI_ISL_5508_   | _A/Waikato/133/2003_          | ___             |
| 348 | 2003-07-08_                   | _EPI_ISL_5541_   | _A/Wellington/49/2003_        | ___             |
| 349 | 2003-07-08_                   | _EPI_ISL_9063_   | _A/Canterbury/390/2003_       | ___             |
| 350 | 2003-07-08_                   | _EPI_ISL_90515_  | _A/Australia/NHRC0008/2003_   | EpiFluDB_       |
| 351 | 2003-07-08_                   | _EPI_ISL_91028_  | _A/Australia/NHRC0005/2003_   | EpiFluDB_       |
| 352 | 2003-07-09_                   | _EPI_ISL_90514_  | _A/Australia/NHRC0009/2003_   | EpiFluDB_       |
| 353 | 2003-07-10_                   | _EPI_ISL_90506_  | _A/Australia/NHRC0010/2003_   | EpiFluDB_       |
| 354 | 2003-07-11_                   | _EPI_ISL_5507_   | _A/Waikato/129/2003_          | ___             |
| 355 | 2003-07-14_                   | _EPI_ISL_9059_   | _A/Canterbury/382/2003_       | ___             |
| 356 | 2003-07-14_                   | _EPI_ISL_9085_   | _A/Canterbury/423/2003_       | ___             |
| 357 | 2003-07-14_                   | _EPI_ISL_9092_   | _A/Canterbury/434/2003_       | ___             |
| 358 | 2003-07-15_                   | _EPI_ISL_9060_   | _A/Canterbury/384/2003_       | ___             |
| 359 | 2003-07-15_                   | _EPI_ISL_9079_   | _A/Canterbury/411/2003_       | ___             |

|     |                        |                  |                                  |           |
|-----|------------------------|------------------|----------------------------------|-----------|
| 360 | 2003-07-15_            | _EPI_ISL_9080_   | _A/Canterbury/412/2003_          | ---       |
| 361 | 2003-07-15_            | _EPI_ISL_9081_   | _A/Canterbury/416/2003_          | ---       |
| 362 | 2003-07-15_            | _EPI_ISL_9083_   | _A/Canterbury/418/2003_          | ---       |
| 363 | 2003-07-15_            | _EPI_ISL_9086_   | _A/Canterbury/424/2003_          | ---       |
| 364 | 2003-07-16_            | _EPI_ISL_5505_   | _A/Wellington/53/2003_           | ---       |
| 365 | 2003-07-16_            | _EPI_ISL_9061_   | _A/Canterbury/386/2003_          | ---       |
| 366 | 2003-07-16_            | _EPI_ISL_9084_   | _A/Canterbury/420/2003_          | ---       |
| 367 | 2003-07-24_            | _EPI_ISL_5509_   | _A/Waikato/139/2003_             | ---       |
| 368 | 2003-07-25_            | _EPI_ISL_5511_   | _A/Waikato/148/2003_             | ---       |
| 369 | 2003-07-26_            | _EPI_ISL_9068_   | _A/Canterbury/395/2003_          | ---       |
| 370 | 2003-07-27_            | _EPI_ISL_6761_   | _A/Queensland/35/2003_           | ---       |
| 371 | 2003-07-28_            | _EPI_ISL_5510_   | _A/Waikato/147/2003_             | ---       |
| 372 | 2003-08-02_            | _EPI_ISL_5639_   | _A/Dunedin/38/2003_              | ---       |
| 373 | 2003-08-07_            | _EPI_ISL_5471_   | _A/Waikato/150/2003_             | ---       |
| 374 | 2003-08-10_            | _EPI_ISL_6479_   | _A/Queensland/36/2003_           | ---       |
| 375 | 2003-08-12_            | _EPI_ISL_6758_   | _A/Queensland/31/2003_           | ---       |
| 376 | 2003-08-13_            | _EPI_ISL_6759_   | _A/Queensland/32/2003_           | ---       |
| 377 | 2003-08-14_            | _EPI_ISL_9070_   | _A/Canterbury/398/2003_          | ---       |
| 378 | 2003-08-14_            | _EPI_ISL_117160_ | _A/Hanoi/HN695/2003_             | EpiFluDB_ |
| 379 | 2003-08-16_            | _EPI_ISL_8249_   | _A/New_York/204/2003_            | ---       |
| 380 | 2003-08-17_            | _EPI_ISL_9065_   | _A/Canterbury/392/2003_          | ---       |
| 381 | 2003-08-17_            | _EPI_ISL_9102_   | _A/Canterbury/444/2003_          | ---       |
| 382 | 2003-08-18_            | _EPI_ISL_9069_   | _A/Canterbury/397/2003_          | ---       |
| 383 | 2003-08-19_            | _EPI_ISL_6524_   | _A/Queensland/37/2003_           | ---       |
| 384 | 2003-08-19_            | _EPI_ISL_9064_   | _A/Canterbury/391/2003_          | ---       |
| 385 | 2003-08-25_            | _EPI_ISL_6478_   | _A/Queensland/33/2003_           | ---       |
| 386 | 2003-08-25_            | _EPI_ISL_6760_   | _A/Queensland/34/2003_           | ---       |
| 387 | 2003-09-03_            | _EPI_ISL_6525_   | _A/Queensland/38/2003_           | ---       |
| 388 | 2003-09-08_            | _EPI_ISL_6186_   | _A/Western_Australia/38/2003_    | ---       |
| 389 | 2003-09-09_            | _EPI_ISL_6185_   | _A/Western_Australia/37/2003_    | ---       |
| 390 | 2003-09-09_            | _EPI_ISL_6193_   | _A/Western_Australia/45/2003_    | ---       |
| 391 | 2003-09-10_            | _EPI_ISL_6194_   | _A/Western_Australia/46/2003_    | ---       |
| 392 | 2003-09-10_            | _EPI_ISL_6526_   | _A/Queensland/40/2003_           | ---       |
| 393 | 2003-09-11_            | _EPI_ISL_6480_   | _A/Queensland/39/2003_           | ---       |
| 394 | 2003-09-12_            | _EPI_ISL_6191_   | _A/Western_Australia/43/2003_    | ---       |
| 395 | 2003-09-15_            | _EPI_ISL_6507_   | _A/Western_Australia/49/2003_    | ---       |
| 396 | 2003-09-17_            | _EPI_ISL_6188_   | _A/Western_Australia/40/2003_    | ---       |
| 397 | 2003-09-17_            | _EPI_ISL_6190_   | _A/Western_Australia/42/2003_    | ---       |
| 398 | 2003-09-17_            | _EPI_ISL_6197_   | _A/Western_Australia/50/2003_    | ---       |
| 399 | 2003-09-22_            | _EPI_ISL_120365_ | _A/Malaysia/25849/2003_          | EpiFluDB_ |
| 400 | 2003-09-23_            | _EPI_ISL_6189_   | _A/Western_Australia/41/2003_    | ---       |
| 401 | 2003-09-24_            | _EPI_ISL_6187_   | _A/Western_Australia/39/2003_    | ---       |
| 402 | 2003-09-25_            | _EPI_ISL_113069_ | _A/Netherlands/312/2003_         | EpiFluDB_ |
| 403 | 2003-09-25_            | _EPI_ISL_117112_ | _A/TayNguyen/TN160/2003_         | EpiFluDB_ |
| 404 | 2003-09-28_            | _EPI_ISL_90499_  | _A/Singapore/NHRC0001/2003_      | EpiFluDB_ |
| 405 | 2003-09-29_            | _EPI_ISL_90543_  | _A/Singapore/NHRC0002/2003_      | EpiFluDB_ |
| 406 | 2003-09-30_            | _EPI_ISL_90542_  | _A/Singapore/NHRC0003/2003_      | EpiFluDB_ |
| 407 | 2003-09-30_            | _EPI_ISL_120366_ | _A/Malaysia/25920/2003_          | EpiFluDB_ |
| 408 | 2003-10_(Day_unknown)_ | _EPI_ISL_107186_ | _A/England/431/2003_             | EpiFluDB_ |
| 409 | 2003-10-01_            | _EPI_ISL_90541_  | _A/Singapore/NHRC0004/2003_      | EpiFluDB_ |
| 410 | 2003-10-03_            | _EPI_ISL_6195_   | _A/Western_Australia/47/2003_    | ---       |
| 411 | 2003-10-03_            | _EPI_ISL_90500_  | _A/Singapore/NHRC0005/2003_      | EpiFluDB_ |
| 412 | 2003-10-05_            | _EPI_ISL_120367_ | _A/Malaysia/25957/2003_          | EpiFluDB_ |
| 413 | 2003-10-06_            | _EPI_ISL_6196_   | _A/Western_Australia/48/2003_    | ---       |
| 414 | 2003-10-07_            | _EPI_ISL_90540_  | _A/Singapore/NHRC0006/2003_      | EpiFluDB_ |
| 415 | 2003-10-08_            | _EPI_ISL_90512_  | _A/Singapore/NHRC0008/2003_      | EpiFluDB_ |
| 416 | 2003-10-08_            | _EPI_ISL_90513_  | _A/Singapore/NHRC0007/2003_      | EpiFluDB_ |
| 417 | 2003-10-09_            | _EPI_ISL_90511_  | _A/Singapore/NHRC0009/2003_      | EpiFluDB_ |
| 418 | 2003-10-10_            | _EPI_ISL_120368_ | _A/Malaysia/26003/2003_          | EpiFluDB_ |
| 419 | 2003-10-11_            | _EPI_ISL_90501_  | _A/Singapore/NHRC0011/2003_      | EpiFluDB_ |
| 420 | 2003-10-11_            | _EPI_ISL_90510_  | _A/Singapore/NHRC0010/2003_      | EpiFluDB_ |
| 421 | 2003-10-13_            | _EPI_ISL_90509_  | _A/Singapore/NHRC0012/2003_      | EpiFluDB_ |
| 422 | 2003-10-21_            | _EPI_ISL_90472_  | _A/South_Carolina/NHRC0001/2003_ | EpiFluDB_ |
| 423 | 2003-10-22_            | _EPI_ISL_6192_   | _A/Western_Australia/44/2003_    | ---       |
| 424 | 2003-10-23_            | _EPI_ISL_107191_ | _A/Scotland/52/2003_             | EpiFluDB_ |
| 425 | 2003-10-24_            | _EPI_ISL_28852_  | _A/Genoa/14/2003_                | ---       |
| 426 | 2003-10-24_            | _EPI_ISL_107185_ | _A/England/430/2003_             | EpiFluDB_ |
| 427 | 2003-10-26_            | _EPI_ISL_107242_ | _A/Scotland/61/2003_             | EpiFluDB_ |
| 428 | 2003-10-27_            | _EPI_ISL_67253_  | _A/New_York/2/2003_              | EpiFluDB_ |
| 429 | 2003-10-27_            | _EPI_ISL_107210_ | _A/England/446/2003_             | EpiFluDB_ |
| 430 | 2003-10-28_            | _EPI_ISL_6677_   | _A/New_York/27/2003_             | ---       |
| 431 | 2003-10-28_            | _EPI_ISL_67252_  | _A/New_York/1/2003_              | EpiFluDB_ |
| 432 | 2003-10-28_            | _EPI_ISL_91106_  | _A/Illinois/NHRC0001/2003_       | EpiFluDB_ |
| 433 | 2003-10-28_            | _EPI_ISL_107324_ | _A/Scotland/72/2003_             | EpiFluDB_ |
| 434 | 2003-10-29_            | _EPI_ISL_107225_ | _A/England/425/2003_             | EpiFluDB_ |
| 435 | 2003-10-29_            | _EPI_ISL_107923_ | _A/England/425/2003_             | EpiFluDB_ |
| 436 | 2003-10-31_            | _EPI_ISL_5056_   | _A/New_York/11/2003_             | ---       |
| 437 | 2003-10-31_            | _EPI_ISL_6668_   | _A/New_York/7/2003_              | ---       |
| 438 | 2003-10-31_            | _EPI_ISL_6698_   | _A/New_York/9/2003_              | ---       |
| 439 | 2003-11_(Day_unknown)_ | _EPI_ISL_107211_ | _A/Scotland/50/2003_             | EpiFluDB_ |
| 440 | 2003-11_(Day_unknown)_ | _EPI_ISL_107264_ | _A/England/740/2003_             | EpiFluDB_ |
| 441 | 2003-11_(Day_unknown)_ | _EPI_ISL_107296_ | _A/England/754/2003_             | EpiFluDB_ |
| 442 | 2003-11_(Day_unknown)_ | _EPI_ISL_107388_ | _A/England/786/2003_             | EpiFluDB_ |
| 443 | 2003-11_(Day_unknown)_ | _EPI_ISL_107404_ | _A/England/539/2003_             | EpiFluDB_ |
| 444 | 2003-11_(Day_unknown)_ | _EPI_ISL_107450_ | _A/England/787/2003_             | EpiFluDB_ |
| 445 | 2003-11_(Day_unknown)_ | _EPI_ISL_107470_ | _A/England/788/2003_             | EpiFluDB_ |
| 446 | 2003-11_(Day_unknown)_ | _EPI_ISL_107471_ | _A/England/789/2003_             | EpiFluDB_ |
| 447 | 2003-11_(Day_unknown)_ | _EPI_ISL_107578_ | _A/England/805/2003_             | EpiFluDB_ |
| 448 | 2003-11-03_            | _EPI_ISL_107212_ | _A/England/419/2003_             | EpiFluDB_ |
| 449 | 2003-11-03_            | _EPI_ISL_107224_ | _A/England/442/2003_             | EpiFluDB_ |
| 450 | 2003-11-03_            | _EPI_ISL_107263_ | _A/England/445/2003_             | EpiFluDB_ |
| 451 | 2003-11-03_            | _EPI_ISL_107323_ | _A/England/475/2003_             | EpiFluDB_ |
| 452 | 2003-11-03_            | _EPI_ISL_107358_ | _A/Scotland/76/2003_             | EpiFluDB_ |
| 453 | 2003-11-04_            | _EPI_ISL_107323_ | _A/Scotland/71/2003_             | EpiFluDB_ |
| 454 | 2003-11-05_            | _EPI_ISL_107387_ | _A/England/470/2003_             | EpiFluDB_ |
| 455 | 2003-11-05_            | _EPI_ISL_107429_ | _A/England/518/2003_             | EpiFluDB_ |
| 456 | 2003-11-05_            | _EPI_ISL_107926_ | _A/England/470/2003_             | EpiFluDB_ |
| 457 | 2003-11-06_            | _EPI_ISL_90473_  | _A/Missouri/NHRC0001/2003_       | EpiFluDB_ |
| 458 | 2003-11-06_            | _EPI_ISL_107326_ | _A/England/467/2003_             | EpiFluDB_ |
| 459 | 2003-11-06_            | _EPI_ISL_107924_ | _A/England/754/2003_             | EpiFluDB_ |
| 460 | 2003-11-07_            | _EPI_ISL_107359_ | _A/Scotland/78/2003_             | EpiFluDB_ |
| 461 | 2003-11-08_            | _EPI_ISL_107385_ | _A/Scotland/79/2003_             | EpiFluDB_ |
| 462 | 2003-11-08_            | _EPI_ISL_107925_ | _A/Scotland/79/2003_             | EpiFluDB_ |
| 463 | 2003-11-11_            | _EPI_ISL_107297_ | _A/England/460/2003_             | EpiFluDB_ |
| 464 | 2003-11-12_            | _EPI_ISL_5035_   | _A/New_York/15/2003_             | ---       |
| 465 | 2003-11-12_            | _EPI_ISL_6652_   | _A/New_York/13/2003_             | ---       |
| 466 | 2003-11-12_            | _EPI_ISL_107241_ | _A/England/438/2003_             | EpiFluDB_ |
| 467 | 2003-11-12_            | _EPI_ISL_107386_ | _A/Scotland/81/2003_             | EpiFluDB_ |
| 468 | 2003-11-13_            | _EPI_ISL_90474_  | _A/California/NHRC0001/2003_     | EpiFluDB_ |
| 469 | 2003-11-13_            | _EPI_ISL_90475_  | _A/South_Carolina/NHRC0002/2003_ | EpiFluDB_ |
| 470 | 2003-11-16_            | _EPI_ISL_107660_ | _A/England/584/2003_             | EpiFluDB_ |
| 471 | 2003-11-16_            | _EPI_ISL_107935_ | _A/England/584/2003_             | EpiFluDB_ |
| 472 | 2003-11-17_            | _EPI_ISL_107265_ | _A/England/642/2003_             | EpiFluDB_ |
| 473 | 2003-11-17_            | _EPI_ISL_107426_ | _A/England/944/2003_             | EpiFluDB_ |
| 474 | 2003-11-18_            | _EPI_ISL_6742_   | _A/New_York/270/2003_            | ---       |
| 475 | 2003-11-18_            | _EPI_ISL_117113_ | _A/TayNguyen/TN186/2003_         | EpiFluDB_ |
| 476 | 2003-11-19_            | _EPI_ISL_4993_   | _A/New_York/28/2003_             | ---       |
| 477 | 2003-11-19_            | _EPI_ISL_107405_ | _A/England/479/2003_             | EpiFluDB_ |
| 478 | 2003-11-19_            | _EPI_ISL_107929_ | _A/England/788/2003_             | EpiFluDB_ |
| 479 | 2003-11-20_            | _EPI_ISL_90476_  | _A/Texas/NHRC0001/2003_          | EpiFluDB_ |
| 480 | 2003-11-20_            | _EPI_ISL_107427_ | _A/England/516/2003_             | EpiFluDB_ |

|                                   |                  |                              |            |
|-----------------------------------|------------------|------------------------------|------------|
| 481 2003-11-20_                   | _EPI_ISL_107451_ | _A/England/520/2003_         | _EpiFluDB_ |
| 482 2003-11-20_                   | _EPI_ISL_107452_ | _A/England/531/2003_         | _EpiFluDB_ |
| 483 2003-11-20_                   | _EPI_ISL_107928_ | _A/England/516/2003_         | _EpiFluDB_ |
| 484 2003-11-21_                   | _EPI_ISL_107506_ | _A/England/492/2003_         | _EpiFluDB_ |
| 485 2003-11-21_                   | _EPI_ISL_107931_ | _A/England/492/2003_         | _EpiFluDB_ |
| 486 2003-11-23_                   | _EPI_ISL_107524_ | _A/England/493/2003_         | _EpiFluDB_ |
| 487 2003-11-23_                   | _EPI_ISL_107932_ | _A/England/493/2003_         | _EpiFluDB_ |
| 488 2003-11-24_                   | _EPI_ISL_106911_ | _A/England/491/2003_         | _EpiFluDB_ |
| 489 2003-11-24_                   | _EPI_ISL_107505_ | _A/England/487/2003_         | _EpiFluDB_ |
| 490 2003-11-24_                   | _EPI_ISL_107507_ | _A/England/491/2003_         | _EpiFluDB_ |
| 491 2003-11-25_                   | _EPI_ISL_107488_ | _A/England/585/2003_         | _EpiFluDB_ |
| 492 2003-11-26_                   | _EPI_ISL_5036_   | _A/New_York/21/2003_         | _          |
| 493 2003-11-26_                   | _EPI_ISL_90477_  | _A/New_Jersey/NHRC0001/2003_ | _EpiFluDB_ |
| 494 2003-11-26_                   | _EPI_ISL_107487_ | _A/England/484/2003_         | _EpiFluDB_ |
| 495 2003-11-26_                   | _EPI_ISL_107555_ | _A/England/568/2003_         | _EpiFluDB_ |
| 496 2003-11-26_                   | _EPI_ISL_107594_ | _A/England/534/2003_         | _EpiFluDB_ |
| 497 2003-11-26_                   | _EPI_ISL_107930_ | _A/England/484/2003_         | _EpiFluDB_ |
| 498 2003-11-27_                   | _EPI_ISL_6740_   | _A/New_York/268/2003_        | _          |
| 499 2003-11-27_                   | _EPI_ISL_107473_ | _A/England/525/2003_         | _EpiFluDB_ |
| 500 2003-11-27_                   | _EPI_ISL_107554_ | _A/England/508/2003_         | _EpiFluDB_ |
| 501 2003-11-27_                   | _EPI_ISL_107616_ | _A/England/532/2003_         | _EpiFluDB_ |
| 502 2003-11-27_                   | _EPI_ISL_107927_ | _A/England/786/2003_         | _EpiFluDB_ |
| 503 2003-11-27_                   | _EPI_ISL_107934_ | _A/England/532/2003_         | _EpiFluDB_ |
| 504 2003-11-28_                   | _EPI_ISL_8228_   | _A/New_York/272/2003_        | _          |
| 505 2003-11-28_                   | _EPI_ISL_107576_ | _A/England/957/2003_         | _EpiFluDB_ |
| 506 2003-11-29_                   | _EPI_ISL_4995_   | _A/New_York/32/2003_         | _          |
| 507 2003-12_(Day_unknown)_        | _EPI_ISL_107537_ | _A/England/528/2003_         | _EpiFluDB_ |
| 508 2003-12_(Day_unknown)_        | _EPI_ISL_107710_ | _A/England/4024313/2003_     | _EpiFluDB_ |
| 509 2003-12-01_                   | _EPI_ISL_6671_   | _A/New_York/18/2003_         | _          |
| 510 2003-12-01_                   | _EPI_ISL_21208_  | _A/New_York/24/2003_         | _          |
| 511 2003-12-01_                   | _EPI_ISL_6714_   | _A/New_York/20/2003_         | _          |
| 512 2003-12-02_                   | _EPI_ISL_4994_   | _A/New_York/30/2003_         | _          |
| 513 2003-12-02_                   | _EPI_ISL_5009_   | _A/New_York/26/2003_         | _          |
| 514 2003-12-02_                   | _EPI_ISL_5037_   | _A/New_York/22/2003_         | _          |
| 515 2003-12-02_                   | _EPI_ISL_107659_ | _A/England/917/2003_         | _EpiFluDB_ |
| 516 2003-12-03_                   | _EPI_ISL_4997_   | _A/New_York/34/2003_         | _          |
| 517 2003-12-03_                   | _EPI_ISL_6653_   | _A/New_York/14/2003_         | _          |
| 518 2003-12-04_                   | _EPI_ISL_4998_   | _A/New_York/35/2003_         | _          |
| 519 2003-12-04_                   | _EPI_ISL_6675_   | _A/New_York/39/2003_         | _          |
| 520 2003-12-04_                   | _EPI_ISL_6699_   | _A/New_York/37/2003_         | _          |
| 521 2003-12-04_                   | _EPI_ISL_107577_ | _A/England/567/2003_         | _EpiFluDB_ |
| 522 2003-12-04_                   | _EPI_ISL_107933_ | _A/England/528/2003_         | _EpiFluDB_ |
| 523 2003-12-05_                   | _EPI_ISL_91065_  | _A/Georgia/NHRC0001/2003_    | _EpiFluDB_ |
| 524 2003-12-05_                   | _EPI_ISL_107538_ | _A/England/485/2003_         | _EpiFluDB_ |
| 525 2003-12-05_                   | _EPI_ISL_107593_ | _A/England/558/2003_         | _EpiFluDB_ |
| 526 2003-12-06_                   | _EPI_ISL_107658_ | _A/England/587/2003_         | _EpiFluDB_ |
| 527 2003-12-08_                   | _EPI_ISL_5003_   | _A/New_York/50/2003_         | _          |
| 528 2003-12-08_                   | _EPI_ISL_5011_   | _A/New_York/41/2003_         | _          |
| 529 2003-12-08_                   | _EPI_ISL_5012_   | _A/New_York/42/2003_         | _          |
| 530 2003-12-08_                   | _EPI_ISL_5014_   | _A/New_York/44/2003_         | _          |
| 531 2003-12-08_                   | _EPI_ISL_5055_   | _A/New_York/4/2003_          | _          |
| 532 2003-12-08_                   | _EPI_ISL_5085_   | _A/New_York/475/2003_        | _          |
| 533 2003-12-08_                   | _EPI_ISL_120369_ | _A/Malaysia/26430/2003_      | _EpiFluDB_ |
| 534 2003-12-09_                   | _EPI_ISL_5000_   | _A/New_York/45/2003_         | _          |
| 535 2003-12-09_                   | _EPI_ISL_5002_   | _A/New_York/48/2003_         | _          |
| 536 2003-12-09_                   | _EPI_ISL_6639_   | _A/New_York/46/2003_         | _          |
| 537 2003-12-09_                   | _EPI_ISL_107618_ | _A/England/909/2003_         | _EpiFluDB_ |
| 538 2003-12-10_                   | _EPI_ISL_4999_   | _A/New_York/36/2003_         | _          |
| 539 2003-12-10_                   | _EPI_ISL_5004_   | _A/New_York/54/2003_         | _          |
| 540 2003-12-10_                   | _EPI_ISL_5013_   | _A/New_York/43/2003_         | _          |
| 541 2003-12-10_                   | _EPI_ISL_6672_   | _A/New_York/51/2003_         | _          |
| 542 2003-12-10_                   | _EPI_ISL_90539_  | _A/California/NHRC0006/2003_ | _EpiFluDB_ |
| 543 2003-12-11_                   | _EPI_ISL_5025_   | _A/New_York/53/2003_         | _          |
| 544 2003-12-11_                   | _EPI_ISL_107685_ | _A/England/593/2003_         | _EpiFluDB_ |
| 545 2003-12-11_                   | _EPI_ISL_120370_ | _A/Malaysia/26468/2003_      | _EpiFluDB_ |
| 546 2003-12-12_                   | _EPI_ISL_5001_   | _A/New_York/47/2003_         | _          |
| 547 2003-12-12_                   | _EPI_ISL_5057_   | _A/New_York/29/2003_         | _          |
| 548 2003-12-12_                   | _EPI_ISL_107617_ | _A/England/522/2003_         | _EpiFluDB_ |
| 549 2003-12-14_                   | _EPI_ISL_107697_ | _A/England/602/2003_         | _EpiFluDB_ |
| 550 2003-12-15_                   | _EPI_ISL_5005_   | _A/New_York/60A/2003_        | _          |
| 551 2003-12-15_                   | _EPI_ISL_132414_ | _A/Mexico/lnDRE2662/2003_    | _EpiFluDB_ |
| 552 2003-12-16_                   | _EPI_ISL_5016_   | _A/New_York/23/2003_         | _          |
| 553 2003-12-16_                   | _EPI_ISL_6659_   | _A/New_York/59/2003_         | _          |
| 554 2003-12-16_                   | _EPI_ISL_6688_   | _A/New_York/56/2003_         | _          |
| 555 2003-12-16_                   | _EPI_ISL_6725_   | _A/New_York/58/2003_         | _          |
| 556 2003-12-16_                   | _EPI_ISL_90508_  | _A/California/NHRC0002/2003_ | _EpiFluDB_ |
| 557 2003-12-16_                   | _EPI_ISL_107684_ | _A/England/592/2003_         | _EpiFluDB_ |
| 558 2003-12-17_                   | _EPI_ISL_90502_  | _A/California/NHRC0003/2003_ | _EpiFluDB_ |
| 559 2003-12-18_                   | _EPI_ISL_5023_   | _A/New_York/19/2003_         | _          |
| 560 2003-12-18_                   | _EPI_ISL_5039_   | _A/New_York/49/2003_         | _          |
| 561 2003-12-18_                   | _EPI_ISL_107634_ | _A/England/547/2003_         | _EpiFluDB_ |
| 562 2003-12-18_                   | _EPI_ISL_107635_ | _A/England/552/2003_         | _EpiFluDB_ |
| 563 2003-12-19_                   | _EPI_ISL_90507_  | _A/California/NHRC0004/2003_ | _EpiFluDB_ |
| 564 2003-12-20_                   | _EPI_ISL_4992_   | _A/New_York/61A/2003_        | _          |
| 565 2003-12-21_                   | _EPI_ISL_6638_   | _A/New_York/38/2003_         | _          |
| 566 2003-12-22_                   | _EPI_ISL_120371_ | _A/Malaysia/26571/2003_      | _EpiFluDB_ |
| 567 2003-12-26_                   | _EPI_ISL_6660_   | _A/New_York/64/2003_         | _          |
| 568 2003-12-29_                   | _EPI_ISL_6661_   | _A/New_York/67/2003_         | _          |
| 569 2003-12-29_                   | _EPI_ISL_6669_   | _A/New_York/8/2003_          | _          |
| 570 2003-12-29_                   | _EPI_ISL_6689_   | _A/New_York/63/2003_         | _          |
| 571 2003-12-29_                   | _EPI_ISL_6690_   | _A/New_York/65/2003_         | _          |
| 572 2004_(Month_and_day_unknown)_ | _EPI_ISL_10117_  | _A/TW/36/04_                 | _          |
| 573 2004_(Month_and_day_unknown)_ | _EPI_ISL_10118_  | _A/TW/220/04_                | _          |
| 574 2004_(Month_and_day_unknown)_ | _EPI_ISL_10119_  | _A/TW/875/04_                | _          |
| 575 2004_(Month_and_day_unknown)_ | _EPI_ISL_113070_ | _A/California/7/2004_        | _EpiFluDB_ |
| 576 2004_(Month_and_day_unknown)_ | _EPI_ISL_117162_ | _A/HaNoi/662/2004_           | _EpiFluDB_ |
| 577 2004_(Month_and_day_unknown)_ | _EPI_ISL_117209_ | _A/HaNoi/BM769/2004_         | _EpiFluDB_ |
| 578 2004_(Month_and_day_unknown)_ | _EPI_ISL_117522_ | _A/HaNoi/BM544/2004_         | _EpiFluDB_ |
| 579 2004_(Month_and_day_unknown)_ | _EPI_ISL_123227_ | _A/New_York/55/2004_         | _EpiFluDB_ |
| 580 2004_(Month_and_day_unknown)_ | _EPI_ISL_127603_ | _A/Wellington/01/2004_       | _EpiFluDB_ |
| 581 2004-01-02_                   | _EPI_ISL_30208_  | _A/Taiwan/9/2004_            | _          |
| 582 2004-01-05_                   | _EPI_ISL_5038_   | _A/New_York/31/2004_         | _          |
| 583 2004-01-05_                   | _EPI_ISL_120372_ | _A/Malaysia/26682/2004_      | _EpiFluDB_ |
| 584 2004-01-06_                   | _EPI_ISL_5062_   | _A/New_York/69/2004_         | _          |
| 585 2004-01-06_                   | _EPI_ISL_6667_   | _A/New_York/6/2004_          | _          |
| 586 2004-01-06_                   | _EPI_ISL_6691_   | _A/New_York/70/2004_         | _          |
| 587 2004-01-09_                   | _EPI_ISL_4996_   | _A/New_York/33/2004_         | _          |
| 588 2004-01-09_                   | _EPI_ISL_91023_  | _A/Missouri/NHRC0002/2004_   | _EpiFluDB_ |
| 589 2004-01-15_                   | _EPI_ISL_5131_   | _A/New_York/499/2004_        | _          |
| 590 2004-01-18_                   | _EPI_ISL_117509_ | _A/HaNoi/HN3069/2004_        | _EpiFluDB_ |
| 591 2004-01-19_                   | _EPI_ISL_120373_ | _A/Malaysia/26822/2004_      | _EpiFluDB_ |
| 592 2004-01-20_                   | _EPI_ISL_90478_  | _A/Georgia/NHRC0001/2004_    | _EpiFluDB_ |
| 593 2004-01-26_                   | _EPI_ISL_65217_  | _A/Wellington/1/2004_        | _EpiFluDB_ |
| 594 2004-01-28_                   | _EPI_ISL_117512_ | _A/HaNoi/HN3094/2004_        | _EpiFluDB_ |
| 595 2004-01-30_                   | _EPI_ISL_6636_   | _A/New_York/10/2004_         | _          |
| 596 2004-02-02_                   | _EPI_ISL_117210_ | _A/HaNoi/HN30130/2004_       | _EpiFluDB_ |
| 597 2004-02-04_                   | _EPI_ISL_117211_ | _A/HaNoi/HN30135/2004_       | _EpiFluDB_ |
| 598 2004-02-04_                   | _EPI_ISL_117262_ | _A/HaNoi/HN30137/2004_       | _EpiFluDB_ |
| 599 2004-02-05_                   | _EPI_ISL_5024_   | _A/New_York/52/2004_         | _          |
| 600 2004-02-05_                   | _EPI_ISL_117304_ | _A/HaNoi/HN30147/2004_       | _EpiFluDB_ |
| 601 2004-02-07_                   | _EPI_ISL_120374_ | _A/Malaysia/26989/2004_      | _EpiFluDB_ |

|     |             |                  |                               |           |
|-----|-------------|------------------|-------------------------------|-----------|
| 602 | 2004-02-10_ | _EPI_ISL_29780_  | _A/Hong_Kong/HKU1/2004_       | ---       |
| 603 | 2004-02-13_ | _EPI_ISL_29479_  | _A/Hong_Kong/HKU2/2004_       | ---       |
| 604 | 2004-02-19_ | _EPI_ISL_29649_  | _A/Hong_Kong/HKU3/2004_       | ---       |
| 605 | 2004-03-01_ | _EPI_ISL_29650_  | _A/Hong_Kong/HKU4/2004_       | ---       |
| 606 | 2004-03-04_ | _EPI_ISL_29677_  | _A/Hong_Kong/HKU5/2004_       | ---       |
| 607 | 2004-03-06_ | _EPI_ISL_29651_  | _A/Hong_Kong/HKU6/2004_       | ---       |
| 608 | 2004-03-10_ | _EPI_ISL_29652_  | _A/Hong_Kong/HKU7/2004_       | ---       |
| 609 | 2004-03-10_ | _EPI_ISL_117305_ | _A/Hanoi/HN30240/2004_        | EpiFluDB_ |
| 610 | 2004-03-22_ | _EPI_ISL_29654_  | _A/Hong_Kong/HKU10/2004_      | ---       |
| 611 | 2004-03-25_ | _EPI_ISL_29481_  | _A/Hong_Kong/HKU11/2004_      | ---       |
| 612 | 2004-03-29_ | _EPI_ISL_29482_  | _A/Hong_Kong/HKU12/2004_      | ---       |
| 613 | 2004-04-16_ | _EPI_ISL_29655_  | _A/Hong_Kong/HKU14/2004_      | ---       |
| 614 | 2004-04-23_ | _EPI_ISL_29656_  | _A/Hong_Kong/HKU15/2004_      | ---       |
| 615 | 2004-05-24_ | _EPI_ISL_120375_ | _A/Malaysia/28114/2004_       | EpiFluDB_ |
| 616 | 2004-05-28_ | _EPI_ISL_30235_  | _A/Hong_Kong/HKU18/2004_      | ---       |
| 617 | 2004-06-01_ | _EPI_ISL_29484_  | _A/Hong_Kong/HKU19/2004_      | ---       |
| 618 | 2004-06-15_ | _EPI_ISL_29485_  | _A/Hong_Kong/HKU20/2004_      | ---       |
| 619 | 2004-06-19_ | _EPI_ISL_29658_  | _A/Hong_Kong/HKU21/2004_      | ---       |
| 620 | 2004-06-23_ | _EPI_ISL_120376_ | _A/Malaysia/28991/2004_       | EpiFluDB_ |
| 621 | 2004-06-29_ | _EPI_ISL_29486_  | _A/Hong_Kong/HKU22/2004_      | ---       |
| 622 | 2004-07-02_ | _EPI_ISL_29659_  | _A/Hong_Kong/HKU23/2004_      | ---       |
| 623 | 2004-07-05_ | _EPI_ISL_29678_  | _A/Hong_Kong/HKU24/2004_      | ---       |
| 624 | 2004-07-07_ | _EPI_ISL_29660_  | _A/Hong_Kong/HKU25/2004_      | ---       |
| 625 | 2004-07-17_ | _EPI_ISL_33843_  | _A/Hong_Kong/HKU28/2004_      | ---       |
| 626 | 2004-07-20_ | _EPI_ISL_8598_   | _A/Christchurch/13/2004_      | ---       |
| 627 | 2004-07-20_ | _EPI_ISL_8597_   | _A/Christchurch/10/2004_      | ---       |
| 628 | 2004-07-20_ | _EPI_ISL_120377_ | _A/Malaysia/29197/2004_       | EpiFluDB_ |
| 629 | 2004-07-21_ | _EPI_ISL_29487_  | _A/Hong_Kong/HKU29/2004_      | ---       |
| 630 | 2004-07-22_ | _EPI_ISL_29661_  | _A/Hong_Kong/HKU30/2004_      | ---       |
| 631 | 2004-07-26_ | _EPI_ISL_120378_ | _A/Malaysia/29242/2004_       | EpiFluDB_ |
| 632 | 2004-07-27_ | _EPI_ISL_120379_ | _A/Malaysia/29255/2004_       | EpiFluDB_ |
| 633 | 2004-07-30_ | _EPI_ISL_29488_  | _A/Hong_Kong/HKU31/2004_      | ---       |
| 634 | 2004-08-02_ | _EPI_ISL_29781_  | _A/Hong_Kong/HKU32/2004_      | ---       |
| 635 | 2004-08-04_ | _EPI_ISL_120380_ | _A/Malaysia/29350/2004_       | EpiFluDB_ |
| 636 | 2004-08-04_ | _EPI_ISL_120381_ | _A/Malaysia/29361/2004_       | EpiFluDB_ |
| 637 | 2004-08-05_ | _EPI_ISL_9112_   | _A/Canterbury/12/2004_        | ---       |
| 638 | 2004-08-07_ | _EPI_ISL_8600_   | _A/Christchurch/14/2004_      | ---       |
| 639 | 2004-08-09_ | _EPI_ISL_29662_  | _A/Hong_Kong/HKU33/2004_      | ---       |
| 640 | 2004-08-12_ | _EPI_ISL_6240_   | _A/Waikato/1/2004_            | ---       |
| 641 | 2004-08-12_ | _EPI_ISL_8599_   | _A/Christchurch/15/2004_      | ---       |
| 642 | 2004-08-15_ | _EPI_ISL_9115_   | _A/Canterbury/18/2004_        | ---       |
| 643 | 2004-08-17_ | _EPI_ISL_9116_   | _A/Canterbury/19/2004_        | ---       |
| 644 | 2004-08-18_ | _EPI_ISL_5473_   | _A/Wellington/6/2004_         | ---       |
| 645 | 2004-08-18_ | _EPI_ISL_5697_   | _A/Wellington/4/2004_         | ---       |
| 646 | 2004-08-18_ | _EPI_ISL_9117_   | _A/Canterbury/20/2004_        | ---       |
| 647 | 2004-08-18_ | _EPI_ISL_29489_  | _A/Hong_Kong/HKU34/2004_      | ---       |
| 648 | 2004-08-19_ | _EPI_ISL_9119_   | _A/Canterbury/23/2004_        | ---       |
| 649 | 2004-08-23_ | _EPI_ISL_5640_   | _A/Wellington/23/2004_        | ---       |
| 650 | 2004-08-24_ | _EPI_ISL_30236_  | _A/Hong_Kong/HKU35/2004_      | ---       |
| 651 | 2004-08-31_ | _EPI_ISL_5542_   | _A/Wellington/14/2004_        | ---       |
| 652 | 2004-09-01_ | _EPI_ISL_5543_   | _A/Wellington/8/2004_         | ---       |
| 653 | 2004-09-01_ | _EPI_ISL_5641_   | _A/Waikato/12/2004_           | ---       |
| 654 | 2004-09-03_ | _EPI_ISL_5698_   | _A/Waikato/3/2004_            | ---       |
| 655 | 2004-09-03_ | _EPI_ISL_8601_   | _A/Christchurch/89/2004_      | ---       |
| 656 | 2004-09-05_ | _EPI_ISL_5546_   | _A/Waikato/21/2004_           | ---       |
| 657 | 2004-09-06_ | _EPI_ISL_5642_   | _A/Wellington/18/2004_        | ---       |
| 658 | 2004-09-07_ | _EPI_ISL_5646_   | _A/Waikato/22/2004_           | ---       |
| 659 | 2004-09-07_ | _EPI_ISL_8602_   | _A/Christchurch/90/2004_      | ---       |
| 660 | 2004-09-07_ | _EPI_ISL_9125_   | _A/Canterbury/104/2004_       | ---       |
| 661 | 2004-09-07_ | _EPI_ISL_9126_   | _A/Canterbury/105/2004_       | ---       |
| 662 | 2004-09-09_ | _EPI_ISL_6159_   | _A/Waikato/16/2004_           | ---       |
| 663 | 2004-09-09_ | _EPI_ISL_9123_   | _A/Canterbury/102/2004_       | ---       |
| 664 | 2004-09-09_ | _EPI_ISL_9124_   | _A/Canterbury/103/2004_       | ---       |
| 665 | 2004-09-10_ | _EPI_ISL_9103_   | _A/Whanganui/128/2004_        | ---       |
| 666 | 2004-09-10_ | _EPI_ISL_9107_   | _A/Tairarwhiti/369/2004_      | ---       |
| 667 | 2004-09-10_ | _EPI_ISL_9110_   | _A/Whanganui/417/2004_        | ---       |
| 668 | 2004-09-11_ | _EPI_ISL_5643_   | _A/Wellington/27/2004_        | ---       |
| 669 | 2004-09-12_ | _EPI_ISL_5544_   | _A/Wellington/22/2004_        | ---       |
| 670 | 2004-09-12_ | _EPI_ISL_9128_   | _A/Canterbury/107/2004_       | ---       |
| 671 | 2004-09-12_ | _EPI_ISL_9192_   | _A/Canterbury/108/2004_       | ---       |
| 672 | 2004-09-12_ | _EPI_ISL_9193_   | _A/Canterbury/109/2004_       | ---       |
| 673 | 2004-09-13_ | _EPI_ISL_6207_   | _A/Western_Australia/60/2004_ | ---       |
| 674 | 2004-09-14_ | _EPI_ISL_5545_   | _A/Wellington/31/2004_        | ---       |
| 675 | 2004-09-14_ | _EPI_ISL_6202_   | _A/Western_Australia/55/2004_ | ---       |
| 676 | 2004-09-14_ | _EPI_ISL_120382_ | _A/Malaysia/29711/2004_       | EpiFluDB_ |
| 677 | 2004-09-15_ | _EPI_ISL_6864_   | _A/Queensland/45/2004_        | ---       |
| 678 | 2004-09-15_ | _EPI_ISL_9130_   | _A/Canterbury/202/2004_       | ---       |
| 679 | 2004-09-15_ | _EPI_ISL_9131_   | _A/Canterbury/205/2004_       | ---       |
| 680 | 2004-09-15_ | _EPI_ISL_90538_  | _A/Malaysia/NHRC0001/2004_    | EpiFluDB_ |
| 681 | 2004-09-16_ | _EPI_ISL_9129_   | _A/Canterbury/201/2004_       | ---       |
| 682 | 2004-09-16_ | _EPI_ISL_31867_  | _A/Canterbury/200/2004_       | ---       |
| 683 | 2004-09-16_ | _EPI_ISL_31867_  | _A/Canterbury/200/2004_       | ---       |
| 684 | 2004-09-16_ | _EPI_ISL_31867_  | _A/Canterbury/200/2004_       | ---       |
| 685 | 2004-09-17_ | _EPI_ISL_8689_   | _A/New_York/468/2004_         | ---       |
| 686 | 2004-09-17_ | _EPI_ISL_8993_   | _A/New_York/467/2004_         | ---       |
| 687 | 2004-09-17_ | _EPI_ISL_29491_  | _A/Hong_Kong/HKU37/2004_      | ---       |
| 688 | 2004-09-18_ | _EPI_ISL_9220_   | _A/Tairarwhiti/223/2004_      | ---       |
| 689 | 2004-09-19_ | _EPI_ISL_6160_   | _A/Wellington/34/2004_        | ---       |
| 690 | 2004-09-20_ | _EPI_ISL_5645_   | _A/Wellington/38/2004_        | ---       |
| 691 | 2004-09-20_ | _EPI_ISL_5649_   | _A/Waikato/35/2004_           | ---       |
| 692 | 2004-09-21_ | _EPI_ISL_5548_   | _A/Waikato/40/2004_           | ---       |
| 693 | 2004-09-21_ | _EPI_ISL_5602_   | _A/Wellington/35/2004_        | ---       |
| 694 | 2004-09-21_ | _EPI_ISL_5603_   | _A/Wellington/45/2004_        | ---       |
| 695 | 2004-09-21_ | _EPI_ISL_5644_   | _A/Wellington/44/2004_        | ---       |
| 696 | 2004-09-21_ | _EPI_ISL_5650_   | _A/Waikato/43/2004_           | ---       |
| 697 | 2004-09-21_ | _EPI_ISL_6198_   | _A/Western_Australia/51/2004_ | ---       |
| 698 | 2004-09-21_ | _EPI_ISL_6199_   | _A/Western_Australia/52/2004_ | ---       |
| 699 | 2004-09-22_ | _EPI_ISL_8603_   | _A/Christchurch/184/2004_     | ---       |
| 700 | 2004-09-23_ | _EPI_ISL_5547_   | _A/Wellington/52/2004_        | ---       |
| 701 | 2004-09-23_ | _EPI_ISL_9135_   | _A/Canterbury/209/2004_       | ---       |
| 702 | 2004-09-23_ | _EPI_ISL_30237_  | _A/Hong_Kong/HKU38/2004_      | ---       |
| 703 | 2004-09-24_ | _EPI_ISL_9132_   | _A/Canterbury/206/2004_       | ---       |
| 704 | 2004-09-25_ | _EPI_ISL_9137_   | _A/Canterbury/303/2004_       | ---       |
| 705 | 2004-09-25_ | _EPI_ISL_90537_  | _A/Malaysia/NHRC0002/2004_    | EpiFluDB_ |
| 706 | 2004-09-26_ | _EPI_ISL_90536_  | _A/Malaysia/NHRC0003/2004_    | EpiFluDB_ |
| 707 | 2004-09-27_ | _EPI_ISL_6890_   | _A/Wellington/55/2004_        | ---       |
| 708 | 2004-09-27_ | _EPI_ISL_8959_   | _A/New_York/470/2004_         | ---       |
| 709 | 2004-09-27_ | _EPI_ISL_9215_   | _A/New_York/472/2004_         | ---       |
| 710 | 2004-09-28_ | _EPI_ISL_5699_   | _A/Wellington/59/2004_        | ---       |
| 711 | 2004-09-28_ | _EPI_ISL_5700_   | _A/Waikato/51/2004_           | ---       |
| 712 | 2004-09-28_ | _EPI_ISL_9141_   | _A/Canterbury/315/2004_       | ---       |
| 713 | 2004-09-29_ | _EPI_ISL_5701_   | _A/Waikato/56/2004_           | ---       |
| 714 | 2004-09-29_ | _EPI_ISL_6200_   | _A/Western_Australia/53/2004_ | ---       |
| 715 | 2004-09-30_ | _EPI_ISL_6482_   | _A/Queensland/48/2004_        | ---       |
| 716 | 2004-10-01_ | _EPI_ISL_6205_   | _A/Western_Australia/58/2004_ | ---       |
| 717 | 2004-10-01_ | _EPI_ISL_6483_   | _A/Queensland/49/2004_        | ---       |
| 718 | 2004-10-02_ | _EPI_ISL_5703_   | _A/Waikato/68/2004_           | ---       |
| 719 | 2004-10-04_ | _EPI_ISL_6203_   | _A/Western_Australia/56/2004_ | ---       |
| 720 | 2004-10-04_ | _EPI_ISL_9138_   | _A/Canterbury/304/2004_       | ---       |
| 721 | 2004-10-05_ | _EPI_ISL_5652_   | _A/Wellington/62/2004_        | ---       |
| 722 | 2004-10-05_ | _EPI_ISL_5702_   | _A/Waikato/64/2004_           | ---       |

|     |                               |                  |                               |           |
|-----|-------------------------------|------------------|-------------------------------|-----------|
| 723 | 2004-10-06                    | _EPI_ISL_6481_   | _A/Queensland/47/2004_        | ---       |
| 724 | 2004-10-06                    | _EPI_ISL_9223_   | _A/Canterbury/309/2004_       | ---       |
| 725 | 2004-10-06                    | _EPI_ISL_120383_ | _A/Malaysia/29890/2004_       | EpiFluDB_ |
| 726 | 2004-10-07                    | _EPI_ISL_6204_   | _A/Western_Australia/57/2004_ | ---       |
| 727 | 2004-10-07                    | _EPI_ISL_6339_   | _A/Wellington/61/2004_        | ---       |
| 728 | 2004-10-07                    | _EPI_ISL_6340_   | _A/Waikato/70/2004_           | ---       |
| 729 | 2004-10-07                    | _EPI_ISL_6762_   | _A/Queensland/41/2004_        | ---       |
| 730 | 2004-10-07                    | _EPI_ISL_9139_   | _A/Canterbury/311/2004_       | ---       |
| 731 | 2004-10-08                    | _EPI_ISL_5704_   | _A/Waikato/69/2004_           | ---       |
| 732 | 2004-10-09                    | _EPI_ISL_6210_   | _A/Western_Australia/63/2004_ | ---       |
| 733 | 2004-10-09                    | _EPI_ISL_6529_   | _A/Queensland/46/2004_        | ---       |
| 734 | 2004-10-09                    | _EPI_ISL_6863_   | _A/Queensland/44/2004_        | ---       |
| 735 | 2004-10-11                    | _EPI_ISL_9105_   | _A/Bay_of_Plenty/279/2004_    | ---       |
| 736 | 2004-10-12                    | _EPI_ISL_8604_   | _A/Ashburton/280/2004_        | ---       |
| 737 | 2004-10-12                    | _EPI_ISL_120384_ | _A/Malaysia/29930/2004_       | EpiFluDB_ |
| 738 | 2004-10-13                    | _EPI_ISL_8605_   | _A/Christchurch/297/2004_     | ---       |
| 739 | 2004-10-14                    | _EPI_ISL_5705_   | _A/Waikato/71/2004_           | ---       |
| 740 | 2004-10-14                    | _EPI_ISL_6208_   | _A/Western_Australia/61/2004_ | ---       |
| 741 | 2004-10-15                    | _EPI_ISL_5708_   | _A/Waikato/73/2004_           | ---       |
| 742 | 2004-10-17                    | _EPI_ISL_6206_   | _A/Western_Australia/59/2004_ | ---       |
| 743 | 2004-10-17                    | _EPI_ISL_9106_   | _A/Bay_of_Plenty/332/2004_    | ---       |
| 744 | 2004-10-18                    | _EPI_ISL_6201_   | _A/Western_Australia/54/2004_ | ---       |
| 745 | 2004-10-18                    | _EPI_ISL_29502_  | _A/Hong_Kong/HKU39/2004_      | ---       |
| 746 | 2004-10-19                    | _EPI_ISL_5706_   | _A/Wellington/64/2004_        | ---       |
| 747 | 2004-10-19                    | _EPI_ISL_5707_   | _A/Waikato/72/2004_           | ---       |
| 748 | 2004-10-19                    | _EPI_ISL_6209_   | _A/Western_Australia/62/2004_ | ---       |
| 749 | 2004-10-24                    | _EPI_ISL_6528_   | _A/Queensland/43/2004_        | ---       |
| 750 | 2004-10-24                    | _EPI_ISL_8596_   | _A/Christchurch/339/2004_     | ---       |
| 751 | 2004-10-27                    | _EPI_ISL_6865_   | _A/Queensland/50/2004_        | ---       |
| 752 | 2004-10-28                    | _EPI_ISL_6211_   | _A/Western_Australia/64/2004_ | ---       |
| 753 | 2004-11-06                    | _EPI_ISL_8612_   | _A/New_York/351/2004_         | ---       |
| 754 | 2004-11-08                    | _EPI_ISL_8273_   | _A/New_York/319/2004_         | ---       |
| 755 | 2004-11-08                    | _EPI_ISL_8690_   | _A/New_York/471/2004_         | ---       |
| 756 | 2004-11-18                    | _EPI_ISL_8238_   | _A/New_York/360/2004_         | ---       |
| 757 | 2004-11-18                    | _EPI_ISL_22628_  | _A/New_York/55/2004_          | ---       |
| 758 | 2004-11-23                    | _EPI_ISL_29663_  | _A/Hong_Kong/HKU40/2004_      | ---       |
| 759 | 2004-11-27                    | _EPI_ISL_8992_   | _A/New_York/466/2004_         | ---       |
| 760 | 2004-12-01                    | _EPI_ISL_8208_   | _A/New_York/356/2004_         | ---       |
| 761 | 2004-12-08                    | _EPI_ISL_8239_   | _A/New_York/362/2004_         | ---       |
| 762 | 2004-12-09                    | _EPI_ISL_8213_   | _A/New_York/371/2004_         | ---       |
| 763 | 2004-12-09                    | _EPI_ISL_8592_   | _A/New_York/232/2004_         | ---       |
| 764 | 2004-12-15                    | _EPI_ISL_8275_   | _A/New_York/363/2004_         | ---       |
| 765 | 2004-12-16                    | _EPI_ISL_8240_   | _A/New_York/365/2004_         | ---       |
| 766 | 2004-12-16                    | _EPI_ISL_8617_   | _A/New_York/123/2004_         | ---       |
| 767 | 2004-12-16                    | _EPI_ISL_8659_   | _A/New_York/237/2004_         | ---       |
| 768 | 2004-12-20                    | _EPI_ISL_8210_   | _A/New_York/366/2004_         | ---       |
| 769 | 2004-12-20                    | _EPI_ISL_8212_   | _A/New_York/370/2004_         | ---       |
| 770 | 2004-12-20                    | _EPI_ISL_8258_   | _A/New_York/377/2004_         | ---       |
| 771 | 2004-12-21                    | _EPI_ISL_8195_   | _A/New_York/392/2004_         | ---       |
| 772 | 2004-12-21                    | _EPI_ISL_8195_   | _A/New_York/392/2004_         | ---       |
| 773 | 2004-12-22                    | _EPI_ISL_6779_   | _A/New_York/900/2004_         | ---       |
| 774 | 2004-12-22                    | _EPI_ISL_20961_  | _A/New_York/900/2004_         | ---       |
| 775 | 2004-12-22                    | _EPI_ISL_20962_  | _A/New_York/900/2004_         | ---       |
| 776 | 2004-12-22                    | _EPI_ISL_20963_  | _A/New_York/900/2004_         | ---       |
| 777 | 2004-12-22                    | _EPI_ISL_20981_  | _A/New_York/900/2004_         | ---       |
| 778 | 2004-12-22                    | _EPI_ISL_8192_   | _A/New_York/386/2004_         | ---       |
| 779 | 2004-12-22                    | _EPI_ISL_8214_   | _A/New_York/372/2004_         | ---       |
| 780 | 2004-12-27                    | _EPI_ISL_6780_   | _A/New_York/905/2004_         | ---       |
| 781 | 2004-12-27                    | _EPI_ISL_20964_  | _A/New_York/905/2004_         | ---       |
| 782 | 2004-12-27                    | _EPI_ISL_6788_   | _A/New_York/908/2004_         | ---       |
| 783 | 2004-12-27                    | _EPI_ISL_20965_  | _A/New_York/908/2004_         | ---       |
| 784 | 2004-12-27                    | _EPI_ISL_20966_  | _A/New_York/908/2004_         | ---       |
| 785 | 2004-12-27                    | _EPI_ISL_20982_  | _A/New_York/908/2004_         | ---       |
| 786 | 2004-12-27                    | _EPI_ISL_21006_  | _A/New_York/908/2004_         | ---       |
| 787 | 2004-12-27                    | _EPI_ISL_8193_   | _A/New_York/387/2004_         | ---       |
| 788 | 2004-12-27                    | _EPI_ISL_8215_   | _A/New_York/374/2004_         | ---       |
| 789 | 2004-12-27                    | _EPI_ISL_8658_   | _A/New_York/236/2004_         | ---       |
| 790 | 2004-12-28                    | _EPI_ISL_8217_   | _A/New_York/381/2004_         | ---       |
| 791 | 2004-12-29                    | _EPI_ISL_8218_   | _A/New_York/383/2004_         | ---       |
| 792 | 2005_(Month_and_day_unknown)_ | _EPI_ISL_6216_   | _A/Western_Australia/73/2005_ | ---       |
| 793 | 2005_(Month_and_day_unknown)_ | _EPI_ISL_6219_   | _A/Western_Australia/78/2005_ | ---       |
| 794 | 2005_(Month_and_day_unknown)_ | _EPI_ISL_6359_   | _A/South_Australia/20/2005_   | ---       |
| 795 | 2005_(Month_and_day_unknown)_ | _EPI_ISL_6366_   | _A/South_Australia/23/2005_   | ---       |
| 796 | 2005_(Month_and_day_unknown)_ | _EPI_ISL_6425_   | _A/South_Australia/22/2005_   | ---       |
| 797 | 2005_(Month_and_day_unknown)_ | _EPI_ISL_6510_   | _A/South_Australia/32/2005_   | ---       |
| 798 | 2005_(Month_and_day_unknown)_ | _EPI_ISL_6754_   | _A/South_Australia/42/2005_   | ---       |
| 799 | 2005_(Month_and_day_unknown)_ | _EPI_ISL_6885_   | _A/South_Australia/61/2005_   | ---       |
| 800 | 2005_(Month_and_day_unknown)_ | _EPI_ISL_7056_   | _A/South_Australia/53/2005_   | ---       |
| 801 | 2005_(Month_and_day_unknown)_ | _EPI_ISL_10145_  | _A/Ontario/RV1273/2005_       | ---       |
| 802 | 2005_(Month_and_day_unknown)_ | _EPI_ISL_10430_  | _A/Wisconsin/67/2005_         | ---       |
| 803 | 2005_(Month_and_day_unknown)_ | _EPI_ISL_10430_  | _A/Wisconsin/67/2005_         | ---       |
| 804 | 2005_(Month_and_day_unknown)_ | _EPI_ISL_115646_ | _A/Wisconsin/67/2005_         | EpiFluDB_ |
| 805 | 2005_(Month_and_day_unknown)_ | _EPI_ISL_118420_ | _A/Hanoi/311/2005_            | EpiFluDB_ |
| 806 | 2005_(Month_and_day_unknown)_ | _EPI_ISL_132409_ | _A/Mexico/InDRE2118/2005_     | EpiFluDB_ |
| 807 | 2005_(Month_and_day_unknown)_ | _EPI_ISL_132410_ | _A/Mexico/InDRE2160/2005_     | EpiFluDB_ |
| 808 | 2005_(Month_and_day_unknown)_ | _EPI_ISL_154510_ | _A/Wisconsin/67/2005_         | EpiFluDB_ |
| 809 | 2005_(Month_and_day_unknown)_ | _EPI_ISL_154531_ | _A/Wisconsin/67/2005_         | EpiFluDB_ |
| 810 | 2005_(Month_and_day_unknown)_ | _EPI_ISL_154511_ | _A/Wisconsin/67/2005_         | EpiFluDB_ |
| 811 | 2005_(Month_and_day_unknown)_ | _EPI_ISL_154512_ | _A/Wisconsin/67/2005_         | EpiFluDB_ |
| 812 | 2005_(Month_and_day_unknown)_ | _EPI_ISL_154513_ | _A/Wisconsin/67/2005_         | EpiFluDB_ |
| 813 | 2005_(Month_and_day_unknown)_ | _EPI_ISL_154514_ | _A/Wisconsin/67/2005_         | EpiFluDB_ |
| 814 | 2005_(Month_and_day_unknown)_ | _EPI_ISL_154515_ | _A/Wisconsin/67/2005_         | EpiFluDB_ |
| 815 | 2005_(Month_and_day_unknown)_ | _EPI_ISL_154516_ | _A/Wisconsin/67/2005_         | EpiFluDB_ |
| 816 | 2005_(Month_and_day_unknown)_ | _EPI_ISL_154517_ | _A/Wisconsin/67/2005_         | EpiFluDB_ |
| 817 | 2005_(Month_and_day_unknown)_ | _EPI_ISL_154518_ | _A/Wisconsin/67/2005_         | EpiFluDB_ |
| 818 | 2005_(Month_and_day_unknown)_ | _EPI_ISL_154519_ | _A/Wisconsin/67/2005_         | EpiFluDB_ |
| 819 | 2005_(Month_and_day_unknown)_ | _EPI_ISL_154520_ | _A/Wisconsin/67/2005_         | EpiFluDB_ |
| 820 | 2005_(Month_and_day_unknown)_ | _EPI_ISL_154521_ | _A/Wisconsin/67/2005_         | EpiFluDB_ |
| 821 | 2005_(Month_and_day_unknown)_ | _EPI_ISL_154522_ | _A/Wisconsin/67/2005_         | EpiFluDB_ |
| 822 | 2005_(Month_and_day_unknown)_ | _EPI_ISL_154523_ | _A/Wisconsin/67/2005_         | EpiFluDB_ |
| 823 | 2005_(Month_and_day_unknown)_ | _EPI_ISL_154524_ | _A/Wisconsin/67/2005_         | EpiFluDB_ |
| 824 | 2005_(Month_and_day_unknown)_ | _EPI_ISL_154525_ | _A/Wisconsin/67/2005_         | EpiFluDB_ |
| 825 | 2005_(Month_and_day_unknown)_ | _EPI_ISL_154526_ | _A/Wisconsin/67/2005_         | EpiFluDB_ |
| 826 | 2005_(Month_and_day_unknown)_ | _EPI_ISL_154527_ | _A/Wisconsin/67/2005_         | EpiFluDB_ |
| 827 | 2005_(Month_and_day_unknown)_ | _EPI_ISL_154528_ | _A/Wisconsin/67/2005_         | EpiFluDB_ |
| 828 | 2005_(Month_and_day_unknown)_ | _EPI_ISL_154529_ | _A/Wisconsin/67/2005_         | EpiFluDB_ |
| 829 | 2005_(Month_and_day_unknown)_ | _EPI_ISL_154530_ | _A/Wisconsin/67/2005_         | EpiFluDB_ |
| 830 | 2005_(Month_and_day_unknown)_ | _EPI_ISL_154543_ | _A/Wisconsin/67/2005_         | EpiFluDB_ |
| 831 | 2005_(Month_and_day_unknown)_ | _EPI_ISL_154532_ | _A/Wisconsin/67/2005_         | EpiFluDB_ |
| 832 | 2005_(Month_and_day_unknown)_ | _EPI_ISL_154533_ | _A/Wisconsin/67/2005_         | EpiFluDB_ |
| 833 | 2005_(Month_and_day_unknown)_ | _EPI_ISL_154534_ | _A/Wisconsin/67/2005_         | EpiFluDB_ |
| 834 | 2005_(Month_and_day_unknown)_ | _EPI_ISL_154535_ | _A/Wisconsin/67/2005_         | EpiFluDB_ |
| 835 | 2005_(Month_and_day_unknown)_ | _EPI_ISL_154536_ | _A/Wisconsin/67/2005_         | EpiFluDB_ |
| 836 | 2005_(Month_and_day_unknown)_ | _EPI_ISL_154537_ | _A/Wisconsin/67/2005_         | EpiFluDB_ |
| 837 | 2005_(Month_and_day_unknown)_ | _EPI_ISL_154538_ | _A/Wisconsin/67/2005_         | EpiFluDB_ |
| 838 | 2005_(Month_and_day_unknown)_ | _EPI_ISL_154544_ | _A/Wisconsin/67/2005_         | EpiFluDB_ |
| 839 | 2005_(Month_and_day_unknown)_ | _EPI_ISL_154539_ | _A/Wisconsin/67/2005_         | EpiFluDB_ |
| 840 | 2005_(Month_and_day_unknown)_ | _EPI_ISL_154545_ | _A/Wisconsin/67/2005_         | EpiFluDB_ |
| 841 | 2005_(Month_and_day_unknown)_ | _EPI_ISL_154540_ | _A/Wisconsin/67/2005_         | EpiFluDB_ |
| 842 | 2005_(Month_and_day_unknown)_ | _EPI_ISL_154546_ | _A/Wisconsin/67/2005_         | EpiFluDB_ |
| 843 | 2005_(Month_and_day_unknown)_ | _EPI_ISL_154547_ | _A/Wisconsin/67/2005_         | EpiFluDB_ |

|     |                               |                  |                                  |            |
|-----|-------------------------------|------------------|----------------------------------|------------|
| 844 | 2005_(Month_and_day_unknown)_ | _EPI_ISL_154541_ | _A/Wisconsin/67/2005_            | _EpiFluDB_ |
| 845 | 2005_(Month_and_day_unknown)_ | _EPI_ISL_154542_ | _A/Wisconsin/67/2005_            | _EpiFluDB_ |
| 846 | 2005_(Month_and_day_unknown)_ | _EPI_ISL_154548_ | _A/Wisconsin/67/2005_            | _EpiFluDB_ |
| 847 | 2005_(Month_and_day_unknown)_ | _EPI_ISL_154549_ | _A/Wisconsin/67/2005_            | _EpiFluDB_ |
| 848 | 2005_(Month_and_day_unknown)_ | _EPI_ISL_154551_ | _A/Wisconsin/67/2005_            | _EpiFluDB_ |
| 849 | 2005_(Month_and_day_unknown)_ | _EPI_ISL_154550_ | _A/Wisconsin/67/2005_            | _EpiFluDB_ |
| 850 | 2005_(Month_and_day_unknown)_ | _EPI_ISL_154552_ | _A/Wisconsin/67/2005_            | _EpiFluDB_ |
| 851 | 2005-01-03_                   | _EPI_ISL_8189_   | _A/New_York/378/2005_            | _          |
| 852 | 2005-01-04_                   | _EPI_ISL_6212_   | _A/Western_Australia/65/2005_    | _          |
| 853 | 2005-01-04_                   | _EPI_ISL_8274_   | _A/New_York/352/2005_            | _          |
| 854 | 2005-01-04_                   | _EPI_ISL_8276_   | _A/New_York/394/2005_            | _          |
| 855 | 2005-01-06_                   | _EPI_ISL_8243_   | _A/New_York/384/2005_            | _          |
| 856 | 2005-01-06_                   | _EPI_ISL_29492_  | _A/Hong_Kong/HKU42/2005_         | _          |
| 857 | 2005-01-07_                   | _EPI_ISL_8194_   | _A/New_York/391/2005_            | _          |
| 858 | 2005-01-10_                   | _EPI_ISL_6781_   | _A/New_York/918/2005_            | _          |
| 859 | 2005-01-10_                   | _EPI_ISL_6789_   | _A/New_York/913/2005_            | _          |
| 860 | 2005-01-10_                   | _EPI_ISL_20968_  | _A/New_York/913/2005_            | _          |
| 861 | 2005-01-10_                   | _EPI_ISL_20969_  | _A/New_York/913/2005_            | _          |
| 862 | 2005-01-10_                   | _EPI_ISL_20970_  | _A/New_York/918/2005_            | _          |
| 863 | 2005-01-10_                   | _EPI_ISL_20971_  | _A/New_York/918/2005_            | _          |
| 864 | 2005-01-10_                   | _EPI_ISL_20972_  | _A/New_York/918/2005_            | _          |
| 865 | 2005-01-10_                   | _EPI_ISL_20987_  | _A/New_York/918/2005_            | _          |
| 866 | 2005-01-10_                   | _EPI_ISL_21000_  | _A/New_York/913/2005_            | _          |
| 867 | 2005-01-11_                   | _EPI_ISL_132408_ | _A/Mexico/InDRE2112/2005_        | _EpiFluDB_ |
| 868 | 2005-01-12_                   | _EPI_ISL_90479_  | _A/Missouri/NHRC0001/2005_       | _EpiFluDB_ |
| 869 | 2005-01-17_                   | _EPI_ISL_8187_   | _A/New_York/359/2005_            | _          |
| 870 | 2005-01-24_                   | _EPI_ISL_8615_   | _A/New_York/395/2005_            | _          |
| 871 | 2005-01-25_                   | _EPI_ISL_5710_   | _A/Waikato/1/2005_               | _          |
| 872 | 2005-01-25_                   | _EPI_ISL_90496_  | _A/Georgia/NHRC0001/2005_        | _EpiFluDB_ |
| 873 | 2005-01-26_                   | _EPI_ISL_6162_   | _A/Waikato/2/2005_               | _          |
| 874 | 2005-01-30_                   | _EPI_ISL_7155_   | _A/Auckland/621/2005_            | _          |
| 875 | 2005-02-02_                   | _EPI_ISL_8188_   | _A/New_York/361/2005_            | _          |
| 876 | 2005-02-02_                   | _EPI_ISL_8957_   | _A/New_York/461/2005_            | _          |
| 877 | 2005-02-07_                   | _EPI_ISL_90535_  | _A/California/NHRC0002/2005_     | _EpiFluDB_ |
| 878 | 2005-02-07_                   | _EPI_ISL_90550_  | _A/California/NHRC0009/2005_     | _EpiFluDB_ |
| 879 | 2005-02-08_                   | _EPI_ISL_8983_   | _A/New_York/462/2005_            | _          |
| 880 | 2005-02-08_                   | _EPI_ISL_91035_  | _A/California/NHRC0010/2005_     | _EpiFluDB_ |
| 881 | 2005-02-09_                   | _EPI_ISL_8687_   | _A/New_York/463/2005_            | _          |
| 882 | 2005-02-10_                   | _EPI_ISL_91157_  | _A/New_Jersey/NHRC0001/2005_     | _EpiFluDB_ |
| 883 | 2005-02-11_                   | _EPI_ISL_90480_  | _A/South_Carolina/NHRC0001/2005_ | _EpiFluDB_ |
| 884 | 2005-02-13_                   | _EPI_ISL_120385_ | _A/Malaysia/31944/2005_          | _EpiFluDB_ |
| 885 | 2005-02-15_                   | _EPI_ISL_8209_   | _A/New_York/357/2005_            | _          |
| 886 | 2005-02-16_                   | _EPI_ISL_8241_   | _A/New_York/367/2005_            | _          |
| 887 | 2005-02-16_                   | _EPI_ISL_90497_  | _A/Texas/NHRC0001/2005_          | _EpiFluDB_ |
| 888 | 2005-02-22_                   | _EPI_ISL_8242_   | _A/New_York/373/2005_            | _          |
| 889 | 2005-02-28_                   | _EPI_ISL_29679_  | _A/Hong_Kong/HKU44/2005_         | _          |
| 890 | 2005-03-04_                   | _EPI_ISL_8196_   | _A/New_York/396/2005_            | _          |
| 891 | 2005-03-04_                   | _EPI_ISL_9168_   | _A/Canterbury/01/2005_           | _          |
| 892 | 2005-03-04_                   | _EPI_ISL_9169_   | _A/Canterbury/02/2005_           | _          |
| 893 | 2005-03-06_                   | _EPI_ISL_9170_   | _A/Canterbury/03/2005_           | _          |
| 894 | 2005-03-07_                   | _EPI_ISL_8688_   | _A/New_York/464/2005_            | _          |
| 895 | 2005-03-07_                   | _EPI_ISL_29664_  | _A/Hong_Kong/HKU45/2005_         | _          |
| 896 | 2005-03-08_                   | _EPI_ISL_8958_   | _A/New_York/465/2005_            | _          |
| 897 | 2005-03-10_                   | _EPI_ISL_90481_  | _A/South_Carolina/NHRC0002/2005_ | _EpiFluDB_ |
| 898 | 2005-03-19_                   | _EPI_ISL_29665_  | _A/Hong_Kong/HKU47/2005_         | _          |
| 899 | 2005-03-23_                   | _EPI_ISL_8246_   | _A/New_York/393/2005_            | _          |
| 900 | 2005-04-01_                   | _EPI_ISL_29680_  | _A/Hong_Kong/HKU48/2005_         | _          |
| 901 | 2005-04-04_                   | _EPI_ISL_33844_  | _A/Hong_Kong/HKU49/2005_         | _          |
| 902 | 2005-04-06_                   | _EPI_ISL_90482_  | _A/Illinois/NHRC0001/2005_       | _EpiFluDB_ |
| 903 | 2005-04-11_                   | _EPI_ISL_29782_  | _A/Hong_Kong/HKU50/2005_         | _          |
| 904 | 2005-04-13_                   | _EPI_ISL_6163_   | _A/Waikato/3/2005_               | _          |
| 905 | 2005-04-13_                   | _EPI_ISL_90534_  | _A/Australia/NHRC0001/2005_      | _EpiFluDB_ |
| 906 | 2005-04-15_                   | _EPI_ISL_90531_  | _A/Australia/NHRC0004/2005_      | _EpiFluDB_ |
| 907 | 2005-04-15_                   | _EPI_ISL_90532_  | _A/Australia/NHRC0003/2005_      | _EpiFluDB_ |
| 908 | 2005-04-15_                   | _EPI_ISL_90533_  | _A/Australia/NHRC0002/2005_      | _EpiFluDB_ |
| 909 | 2005-04-16_                   | _EPI_ISL_30238_  | _A/Hong_Kong/HKU52/2005_         | _          |
| 910 | 2005-04-16_                   | _EPI_ISL_90530_  | _A/Australia/NHRC0005/2005_      | _EpiFluDB_ |
| 911 | 2005-04-22_                   | _EPI_ISL_195615_ | _A/Quebec/26-220405/2005_        | _EpiFluDB_ |
| 912 | 2005-05-04_                   | _EPI_ISL_9199_   | _A/Canterbury/24/2005_           | _          |
| 913 | 2005-05-05_                   | _EPI_ISL_29683_  | _A/Hong_Kong/HKU58/2005_         | _          |
| 914 | 2005-05-07_                   | _EPI_ISL_29684_  | _A/Hong_Kong/HKU59/2005_         | _          |
| 915 | 2005-05-11_                   | _EPI_ISL_29685_  | _A/Hong_Kong/HKU61/2005_         | _          |
| 916 | 2005-05-13_                   | _EPI_ISL_29494_  | _A/Hong_Kong/HKU62/2005_         | _          |
| 917 | 2005-05-14_                   | _EPI_ISL_29686_  | _A/Hong_Kong/HKU63/2005_         | _          |
| 918 | 2005-05-16_                   | _EPI_ISL_29687_  | _A/Hong_Kong/HKU64/2005_         | _          |
| 919 | 2005-05-17_                   | _EPI_ISL_29495_  | _A/Hong_Kong/HKU65/2005_         | _          |
| 920 | 2005-05-20_                   | _EPI_ISL_9188_   | _A/Canterbury/16/2005_           | _          |
| 921 | 2005-05-21_                   | _EPI_ISL_29688_  | _A/Hong_Kong/HKU66/2005_         | _          |
| 922 | 2005-05-23_                   | _EPI_ISL_29496_  | _A/Hong_Kong/HKU67/2005_         | _          |
| 923 | 2005-05-25_                   | _EPI_ISL_5102_   | _A/Canterbury/26/2005_           | _          |
| 924 | 2005-05-27_                   | _EPI_ISL_9200_   | _A/Canterbury/29/2005_           | _          |
| 925 | 2005-05-27_                   | _EPI_ISL_29498_  | _A/Hong_Kong/HKU69/2005_         | _          |
| 926 | 2005-05-30_                   | _EPI_ISL_29499_  | _A/Hong_Kong/HKU70/2005_         | _          |
| 927 | 2005-05-31_                   | _EPI_ISL_29500_  | _A/Hong_Kong/HKU71/2005_         | _          |
| 928 | 2005-06-01_                   | _EPI_ISL_33845_  | _A/Hong_Kong/HKU72/2005_         | _          |
| 929 | 2005-06-02_                   | _EPI_ISL_64669_  | _A/Hong_Kong/HKU73/2005_         | _EpiFluDB_ |
| 930 | 2005-06-13_                   | _EPI_ISL_90524_  | _A/Australia/NHRC0012/2005_      | _EpiFluDB_ |
| 931 | 2005-06-13_                   | _EPI_ISL_90525_  | _A/Australia/NHRC0011/2005_      | _EpiFluDB_ |
| 932 | 2005-06-13_                   | _EPI_ISL_90526_  | _A/Australia/NHRC0009/2005_      | _EpiFluDB_ |
| 933 | 2005-06-13_                   | _EPI_ISL_90527_  | _A/Australia/NHRC0008/2005_      | _EpiFluDB_ |
| 934 | 2005-06-13_                   | _EPI_ISL_90528_  | _A/Australia/NHRC0007/2005_      | _EpiFluDB_ |
| 935 | 2005-06-13_                   | _EPI_ISL_90529_  | _A/Australia/NHRC0006/2005_      | _EpiFluDB_ |
| 936 | 2005-06-13_                   | _EPI_ISL_91029_  | _A/Australia/NHRC0010/2005_      | _EpiFluDB_ |
| 937 | 2005-06-14_                   | _EPI_ISL_117857_ | _A/TayNguyen/TN335/2005_         | _EpiFluDB_ |
| 938 | 2005-06-14_                   | _EPI_ISL_118005_ | _A/TayNguyen/TN332/2005_         | _EpiFluDB_ |
| 939 | 2005-06-15_                   | _EPI_ISL_90520_  | _A/Hong_Kong/NHRC0001/2005_      | _EpiFluDB_ |
| 940 | 2005-06-15_                   | _EPI_ISL_90523_  | _A/Australia/NHRC0013/2005_      | _EpiFluDB_ |
| 941 | 2005-06-17_                   | _EPI_ISL_30240_  | _A/Hong_Kong/HKU75/2005_         | _          |
| 942 | 2005-06-17_                   | _EPI_ISL_90522_  | _A/Australia/NHRC0014/2005_      | _EpiFluDB_ |
| 943 | 2005-06-19_                   | _EPI_ISL_90521_  | _A/Australia/NHRC0015/2005_      | _EpiFluDB_ |
| 944 | 2005-06-21_                   | _EPI_ISL_9201_   | _A/Canterbury/67/2005_           | _          |
| 945 | 2005-06-21_                   | _EPI_ISL_30241_  | _A/Hong_Kong/HKU76/2005_         | _          |
| 946 | 2005-06-28_                   | _EPI_ISL_6213_   | _A/Western_Australia/66/2005_    | _          |
| 947 | 2005-06-29_                   | _EPI_ISL_30242_  | _A/Hong_Kong/HKU77/2005_         | _          |
| 948 | 2005-07-01_                   | _EPI_ISL_5104_   | _A/Canterbury/124/2005_          | _          |
| 949 | 2005-07-01_                   | _EPI_ISL_5713_   | _A/Otago/1/2005_                 | _          |
| 950 | 2005-07-02_                   | _EPI_ISL_9202_   | _A/Canterbury/127/2005_          | _          |
| 951 | 2005-07-03_                   | _EPI_ISL_9203_   | _A/Canterbury/129/2005_          | _          |
| 952 | 2005-07-04_                   | _EPI_ISL_6214_   | _A/Western_Australia/68/2005_    | _          |
| 953 | 2005-07-05_                   | _EPI_ISL_6406_   | _A/Western_Australia/69/2005_    | _          |
| 954 | 2005-07-08_                   | _EPI_ISL_9204_   | _A/Canterbury/166/2005_          | _          |
| 955 | 2005-07-09_                   | _EPI_ISL_5711_   | _A/Wellington/1/2005_            | _          |
| 956 | 2005-07-09_                   | _EPI_ISL_6630_   | _A/Western_Australia/67/2005_    | _          |
| 957 | 2005-07-09_                   | _EPI_ISL_33846_  | _A/Hong_Kong/HKU78/2005_         | _          |
| 958 | 2005-07-11_                   | _EPI_ISL_5712_   | _A/Wellington/2/2005_            | _          |
| 959 | 2005-07-11_                   | _EPI_ISL_6215_   | _A/Western_Australia/70/2005_    | _          |
| 960 | 2005-07-11_                   | _EPI_ISL_9239_   | _A/Canterbury/186/2005_          | _          |
| 961 | 2005-07-12_                   | _EPI_ISL_6164_   | _A/Wellington/4/2005_            | _          |
| 962 | 2005-07-12_                   | _EPI_ISL_6530_   | _A/Queensland/51/2005_           | _          |
| 963 | 2005-07-13_                   | _EPI_ISL_5714_   | _A/Wellington/3/2005_            | _          |
| 964 | 2005-07-13_                   | _EPI_ISL_9205_   | _A/Canterbury/206/2005_          | _          |

|      |                              |                 |                                 |           |
|------|------------------------------|-----------------|---------------------------------|-----------|
| 965  | 2005-07-15                   | _EPI_ISL_120386 | _A/Malaysia/31998/2005          | _EpiFluDB |
| 966  | 2005-07-16                   | _EPI_ISL_5613   | _A/Canterbury/232/2005          | ---       |
| 967  | 2005-07-16                   | _EPI_ISL_29501  | _A/Hong_Kong/HKU79/2005         | ---       |
| 968  | 2005-07-18                   | _EPI_ISL_9240   | _A/Canterbury/204/2005          | ---       |
| 969  | 2005-07-19                   | _EPI_ISL_117858 | _A/TayNguyen/TN343/2005         | _EpiFluDB |
| 970  | 2005-07-20                   | _EPI_ISL_9206   | _A/Canterbury/212/2005          | ---       |
| 971  | 2005-07-21                   | _EPI_ISL_6407   | _A/Western_Australia/72/2005    | ---       |
| 972  | 2005-07-22                   | _EPI_ISL_6531   | _A/Queensland/52/2005           | ---       |
| 973  | 2005-07-26                   | _EPI_ISL_6165   | _A/Wellington/5/2005            | ---       |
| 974  | 2005-07-26                   | _EPI_ISL_6763   | _A/Queensland/53/2005           | ---       |
| 975  | 2005-07-27                   | _EPI_ISL_6218   | _A/Western_Australia/75/2005    | ---       |
| 976  | 2005-07-29                   | _EPI_ISL_6217   | _A/Western_Australia/74/2005    | ---       |
| 977  | 2005-07-31                   | _EPI_ISL_9244   | _A/Canterbury/236/2005          | ---       |
| 978  | 2005-08-01                   | _EPI_ISL_6421   | _A/Western_Australia/76/2005    | ---       |
| 979  | 2005-08-01                   | _EPI_ISL_9207   | _A/Canterbury/259/2005          | ---       |
| 980  | 2005-08-01                   | _EPI_ISL_117859 | _A/TayNguyen/TN348/2005         | _EpiFluDB |
| 981  | 2005-08-02                   | _EPI_ISL_6484   | _A/Queensland/55/2005           | ---       |
| 982  | 2005-08-03                   | _EPI_ISL_6422   | _A/Western_Australia/79/2005    | ---       |
| 983  | 2005-08-04                   | _EPI_ISL_120387 | _A/Malaysia/32171/2005          | _EpiFluDB |
| 984  | 2005-08-08                   | _EPI_ISL_5715   | _A/Southland/5/2005             | ---       |
| 985  | 2005-08-08                   | _EPI_ISL_120388 | _A/Malaysia/32133/2005          | _EpiFluDB |
| 986  | 2005-08-09                   | _EPI_ISL_5716   | _A/Waikato/8/2005               | ---       |
| 987  | 2005-08-09                   | _EPI_ISL_5718   | _A/Waikato/16/2005              | ---       |
| 988  | 2005-08-09                   | _EPI_ISL_6342   | _A/Waikato/18/2005              | ---       |
| 989  | 2005-08-10                   | _EPI_ISL_5717   | _A/Waikato/7/2005               | ---       |
| 990  | 2005-08-10                   | _EPI_ISL_120389 | _A/Malaysia/32226/2005          | _EpiFluDB |
| 991  | 2005-08-11                   | _EPI_ISL_5719   | _A/Otago/2/2005                 | ---       |
| 992  | 2005-08-11                   | _EPI_ISL_6167   | _A/Waikato/15/2005              | ---       |
| 993  | 2005-08-11                   | _EPI_ISL_6764   | _A/Queensland/54/2005           | ---       |
| 994  | 2005-08-12                   | _EPI_ISL_7080   | _A/Waikato/6/2005               | ---       |
| 995  | 2005-08-14                   | _EPI_ISL_6166   | _A/Wellington/6/2005            | ---       |
| 996  | 2005-08-15                   | _EPI_ISL_5722   | _A/Waikato/9/2005               | ---       |
| 997  | 2005-08-16                   | _EPI_ISL_5227   | _A/Canterbury/250/2005          | ---       |
| 998  | 2005-08-16                   | _EPI_ISL_6765   | _A/Queensland/56/2005           | ---       |
| 999  | 2005-08-18                   | _EPI_ISL_6834   | _A/Queensland/60/2005           | ---       |
| 1000 | 2005-08-18                   | _EPI_ISL_117860 | _A/TayNguyen/TN362/2005         | _EpiFluDB |
| 1001 | 2005-08-18                   | _EPI_ISL_117861 | _A/TayNguyen/TN363/2005         | _EpiFluDB |
| 1002 | 2005-08-18                   | _EPI_ISL_117862 | _A/TayNguyen/TN367/2005         | _EpiFluDB |
| 1003 | 2005-08-20                   | _EPI_ISL_117951 | _A/TayNguyen/TN368/2005         | _EpiFluDB |
| 1004 | 2005-08-22                   | _EPI_ISL_6485   | _A/Queensland/57/2005           | ---       |
| 1005 | 2005-08-23                   | _EPI_ISL_5720   | _A/Wellington/8/2005            | ---       |
| 1006 | 2005-08-23                   | _EPI_ISL_5721   | _A/Wellington/9/2005            | ---       |
| 1007 | 2005-08-23                   | _EPI_ISL_6343   | _A/Wellington/7/2005            | ---       |
| 1008 | 2005-08-26                   | _EPI_ISL_6168   | _A/Waikato/10/2005              | ---       |
| 1009 | 2005-08-30                   | _EPI_ISL_117952 | _A/TayNguyen/TN380/2005         | _EpiFluDB |
| 1010 | 2005-08-31                   | _EPI_ISL_5723   | _A/Otago/4/2005                 | ---       |
| 1011 | 2005-08-31                   | _EPI_ISL_5724   | _A/Otago/3/2005                 | ---       |
| 1012 | 2005-09-11                   | _EPI_ISL_132411 | _A/Mexico/InDRE2227/2005        | _EpiFluDB |
| 1013 | 2005-09-11                   | _EPI_ISL_132412 | _A/Mexico/InDRE2246/2005        | _EpiFluDB |
| 1014 | 2005-09-13                   | _EPI_ISL_5725   | _A/Waikato/12/2005              | ---       |
| 1015 | 2005-09-26                   | _EPI_ISL_117953 | _A/TayNguyen/TN388/2005         | _EpiFluDB |
| 1016 | 2005-09-28                   | _EPI_ISL_7286   | _A/Auckland/617/2005            | ---       |
| 1017 | 2005-09-29                   | _EPI_ISL_7153   | _A/Auckland/616/2005            | ---       |
| 1018 | 2005-10-03                   | _EPI_ISL_117954 | _A/TayNguyen/TN393/2005         | _EpiFluDB |
| 1019 | 2005-10-10                   | _EPI_ISL_117955 | _A/TayNguyen/TN403/2005         | _EpiFluDB |
| 1020 | 2005-10-13                   | _EPI_ISL_117956 | _A/TayNguyen/TN405/2005         | _EpiFluDB |
| 1021 | 2005-10-13                   | _EPI_ISL_118003 | _A/TayNguyen/TN406/2005         | _EpiFluDB |
| 1022 | 2005-10-17                   | _EPI_ISL_118004 | _A/TayNguyen/TN410/2005         | _EpiFluDB |
| 1023 | 2005-10-20                   | _EPI_ISL_6860   | _A/Western_Australia/71/2005    | ---       |
| 1024 | 2005-10-25                   | _EPI_ISL_90544  | _A/California/NHRC0003/2005     | _EpiFluDB |
| 1025 | 2005-11-02                   | _EPI_ISL_90545  | _A/California/NHRC0004/2005     | _EpiFluDB |
| 1026 | 2005-11-15                   | _EPI_ISL_90548  | _A/California/NHRC0007/2005     | _EpiFluDB |
| 1027 | 2005-11-15                   | _EPI_ISL_195620 | _A/Quebec/26-151105/2005        | _EpiFluDB |
| 1028 | 2005-11-29                   | _EPI_ISL_90546  | _A/California/NHRC0005/2005     | _EpiFluDB |
| 1029 | 2005-11-30                   | _EPI_ISL_90483  | _A/California/NHRC0001/2005     | _EpiFluDB |
| 1030 | 2005-11-30                   | _EPI_ISL_105790 | _A/Kunming/1-Va10/2005          | _EpiFluDB |
| 1031 | 2005-12-02                   | _EPI_ISL_90547  | _A/California/NHRC0006/2005     | _EpiFluDB |
| 1032 | 2005-12-03                   | _EPI_ISL_195621 | _A/Quebec/26-031205/2005        | _EpiFluDB |
| 1033 | 2005-12-03                   | _EPI_ISL_195624 | _A/Quebec/26-031205/2005        | _EpiFluDB |
| 1034 | 2005-12-05                   | _EPI_ISL_90549  | _A/California/NHRC0008/2005     | _EpiFluDB |
| 1035 | 2005-12-19                   | _EPI_ISL_90484  | _A/Texas/NHRC0002/2005          | _EpiFluDB |
| 1036 | 2005-12-23                   | _EPI_ISL_90485  | _A/Illinois/NHRC0002/2005       | _EpiFluDB |
| 1037 | 2005-12-30                   | _EPI_ISL_120390 | _A/Malaysia/33386/2005          | _EpiFluDB |
| 1038 | 2006_(Month_and_day_unknown) | _EPI_ISL_12843  | _A/Thailand/CU46/2006           | ---       |
| 1039 | 2006_(Month_and_day_unknown) | _EPI_ISL_12846  | _A/Thailand/CU228/2006          | ---       |
| 1040 | 2006_(Month_and_day_unknown) | _EPI_ISL_12850  | _A/Thailand/CU231/2006          | ---       |
| 1041 | 2006_(Month_and_day_unknown) | _EPI_ISL_127612 | _A/Nepal/921/2006               | _EpiFluDB |
| 1042 | 2006_(Month_and_day_unknown) | _EPI_ISL_127614 | _A/Brisbane/09/2006             | _EpiFluDB |
| 1043 | 2006-01-09                   | _EPI_ISL_90498  | _A/Georgia/NHRC0001/2006        | _EpiFluDB |
| 1044 | 2006-01-10                   | _EPI_ISL_118419 | _A/TayNguyen/HCMS2/2006         | _EpiFluDB |
| 1045 | 2006-01-11                   | _EPI_ISL_120391 | _A/Malaysia/33464/2006          | _EpiFluDB |
| 1046 | 2006-01-11                   | _EPI_ISL_120392 | _A/Malaysia/33827/2006          | _EpiFluDB |
| 1047 | 2006-01-16                   | _EPI_ISL_132415 | _A/Mexico/InDRE29/2006          | _EpiFluDB |
| 1048 | 2006-01-23                   | _EPI_ISL_120393 | _A/Malaysia/33561/2006          | _EpiFluDB |
| 1049 | 2006-01-27                   | _EPI_ISL_195623 | _A/Quebec/26-270106/2006        | _EpiFluDB |
| 1050 | 2006-01-31                   | _EPI_ISL_195622 | _A/Quebec/26-310106/2006        | _EpiFluDB |
| 1051 | 2006-02-13                   | _EPI_ISL_90486  | _A/Texas/NHRC0001/2006          | _EpiFluDB |
| 1052 | 2006-02-15                   | _EPI_ISL_90487  | _A/Illinois/NHRC0001/2006       | _EpiFluDB |
| 1053 | 2006-02-21                   | _EPI_ISL_90488  | _A/California/NHRC0001/2006     | _EpiFluDB |
| 1054 | 2006-02-23                   | _EPI_ISL_6842   | _A/New_York/923/2006            | ---       |
| 1055 | 2006-02-23                   | _EPI_ISL_20988  | _A/New_York/923/2006            | ---       |
| 1056 | 2006-02-23                   | _EPI_ISL_20989  | _A/New_York/923/2006            | ---       |
| 1057 | 2006-02-23                   | _EPI_ISL_20990  | _A/New_York/923/2006            | ---       |
| 1058 | 2006-02-23                   | _EPI_ISL_20998  | _A/New_York/923/2006            | ---       |
| 1059 | 2006-02-25                   | _EPI_ISL_115647 | _A/Netherlands/42/2006          | _EpiFluDB |
| 1060 | 2006-02-28                   | _EPI_ISL_6790   | _A/New_York/928/2006            | ---       |
| 1061 | 2006-02-28                   | _EPI_ISL_20983  | _A/New_York/928/2006            | ---       |
| 1062 | 2006-02-28                   | _EPI_ISL_20986  | _A/New_York/928/2006            | ---       |
| 1063 | 2006-02-28                   | _EPI_ISL_20991  | _A/New_York/928/2006            | ---       |
| 1064 | 2006-02-28                   | _EPI_ISL_20992  | _A/New_York/928/2006            | ---       |
| 1065 | 2006-03-01                   | _EPI_ISL_6791   | _A/New_York/933/2006            | ---       |
| 1066 | 2006-03-01                   | _EPI_ISL_20984  | _A/New_York/933/2006            | ---       |
| 1067 | 2006-03-01                   | _EPI_ISL_20985  | _A/New_York/933/2006            | ---       |
| 1068 | 2006-03-01                   | _EPI_ISL_20993  | _A/New_York/933/2006            | ---       |
| 1069 | 2006-03-01                   | _EPI_ISL_20994  | _A/New_York/933/2006            | ---       |
| 1070 | 2006-03-02                   | _EPI_ISL_6843   | _A/New_York/938/2006            | ---       |
| 1071 | 2006-03-02                   | _EPI_ISL_20995  | _A/New_York/938/2006            | ---       |
| 1072 | 2006-03-02                   | _EPI_ISL_20996  | _A/New_York/938/2006            | ---       |
| 1073 | 2006-03-02                   | _EPI_ISL_20997  | _A/New_York/938/2006            | ---       |
| 1074 | 2006-03-02                   | _EPI_ISL_20999  | _A/New_York/938/2006            | ---       |
| 1075 | 2006-03-16                   | _EPI_ISL_120394 | _A/Malaysia/34015/2006          | _EpiFluDB |
| 1076 | 2006-03-22                   | _EPI_ISL_64204  | _A/New_York/4/2006              | _EpiFluDB |
| 1077 | 2006-03-28                   | _EPI_ISL_90489  | _A/South_Carolina/NHRC0001/2006 | _EpiFluDB |
| 1078 | 2006-04-04                   | _EPI_ISL_90490  | _A/Texas/NHRC0002/2006          | _EpiFluDB |
| 1079 | 2006-04-05                   | _EPI_ISL_5612   | _A/New_York/5/2006              | ---       |
| 1080 | 2006-04-05                   | _EPI_ISL_5728   | _A/New_York/7/2006              | ---       |
| 1081 | 2006-04-05                   | _EPI_ISL_90491  | _A/Missouri/NHRC0001/2006       | _EpiFluDB |
| 1082 | 2006-04-06                   | _EPI_ISL_6408   | _A/New_York/6/2006              | ---       |
| 1083 | 2006-04-06                   | _EPI_ISL_90492  | _A/Illinois/NHRC0002/2006       | _EpiFluDB |
| 1084 | 2006-10-12                   | _EPI_ISL_120395 | _A/Malaysia/1657167/2006        | _EpiFluDB |
| 1085 | 2006-10-19                   | _EPI_ISL_120396 | _A/Malaysia/1665090/2006        | _EpiFluDB |

|                                    |                  |                               |            |
|------------------------------------|------------------|-------------------------------|------------|
| 1086 2006-11-15_                   | _EPI_ISL_120397_ | _A/Malaysia/1674395/2006_     | _EpiFluDB_ |
| 1087 2006-11-17_                   | _EPI_ISL_120398_ | _A/Malaysia/1676558/2006_     | _EpiFluDB_ |
| 1088 2006-11-24_                   | _EPI_ISL_120399_ | _A/Malaysia/1681079/2006_     | _EpiFluDB_ |
| 1089 2006-11-28_                   | _EPI_ISL_195625_ | _A/Quebec/26-281106/2006_     | _EpiFluDB_ |
| 1090 2006-12-19_                   | _EPI_ISL_195626_ | _A/Quebec/26-191206/2006_     | _EpiFluDB_ |
| 1091 2006-12-24_                   | _EPI_ISL_115648_ | _A/Netherlands/363/2006_      | _EpiFluDB_ |
| 1092 2007_(Month_and_day_unknown)_ | _EPI_ISL_12845_  | _A/Thailand/CU280/2007_       | _          |
| 1093 2007_(Month_and_day_unknown)_ | _EPI_ISL_12847_  | _A/Thailand/CU282/2007_       | _          |
| 1094 2007_(Month_and_day_unknown)_ | _EPI_ISL_14418_  | _A/Ontario/1252/2007_         | _          |
| 1095 2007_(Month_and_day_unknown)_ | _EPI_ISL_25019_  | _A/Brisbane/10/2007_          | _          |
| 1096 2007_(Month_and_day_unknown)_ | _EPI_ISL_69392_  | _A/Tokyo/Ut-Sk-1/2007_        | _EpiFluDB_ |
| 1097 2007_(Month_and_day_unknown)_ | _EPI_ISL_78573_  | _A/Peru/WRAIR1508P/2007_      | _EpiFluDB_ |
| 1098 2007_(Month_and_day_unknown)_ | _EPI_ISL_118107_ | _A/HungYen/HY6/2007_          | _EpiFluDB_ |
| 1099 2007_(Month_and_day_unknown)_ | _EPI_ISL_127613_ | _A/Wisconsin/03/2007_         | _EpiFluDB_ |
| 1100 2007-01-02_                   | _EPI_ISL_29906_  | _A/Taiwan/70002/2007_         | _          |
| 1101 2007-01-08_                   | _EPI_ISL_7756_   | _A/Colorado/UR06-0023/2007_   | _          |
| 1102 2007-01-08_                   | _EPI_ISL_19134_  | _A/Virginia/UR06-0021/2007_   | _          |
| 1103 2007-01-08_                   | _EPI_ISL_7930_   | _A/Colorado/UR06-022/2007_    | _          |
| 1104 2007-01-08_                   | _EPI_ISL_7931_   | _A/Colorado/UR06-0024/2007_   | _          |
| 1105 2007-01-10_                   | _EPI_ISL_118319_ | _A/HaNoi/TX019/2007_          | _EpiFluDB_ |
| 1106 2007-01-11_                   | _EPI_ISL_118163_ | _A/HaNoi/Q031/2007_           | _EpiFluDB_ |
| 1107 2007-01-12_                   | _EPI_ISL_118320_ | _A/HaNoi/TX022/2007_          | _EpiFluDB_ |
| 1108 2007-01-12_                   | _EPI_ISL_118321_ | _A/HaNoi/TX023/2007_          | _EpiFluDB_ |
| 1109 2007-01-15_                   | _EPI_ISL_7656_   | _A/Illinois/UR06-0036/2007_   | _          |
| 1110 2007-01-15_                   | _EPI_ISL_7657_   | _A/Illinois/UR06-0030/2007_   | _          |
| 1111 2007-01-15_                   | _EPI_ISL_29907_  | _A/Taiwan/70113/2007_         | _          |
| 1112 2007-01-17_                   | _EPI_ISL_7609_   | _A/New_York/UR06-0040/2007_   | _          |
| 1113 2007-01-17_                   | _EPI_ISL_8042_   | _A/Kentucky/UR06-0044/2007_   | _          |
| 1114 2007-01-22_                   | _EPI_ISL_118111_ | _A/HaNoi/N035/2007_           | _EpiFluDB_ |
| 1115 2007-01-25_                   | _EPI_ISL_118164_ | _A/HaNoi/Q071/2007_           | _EpiFluDB_ |
| 1116 2007-01-28_                   | _EPI_ISL_118322_ | _A/HaNoi/TX067/2007_          | _EpiFluDB_ |
| 1117 2007-01-29_                   | _EPI_ISL_7621_   | _A/California/UR06-0118/2007_ | _          |
| 1118 2007-01-29_                   | _EPI_ISL_118368_ | _A/HaNoi/TX072/2007_          | _EpiFluDB_ |
| 1119 2007-02-02_                   | _EPI_ISL_7623_   | _A/Florida/UR06-0150/2007_    | _          |
| 1120 2007-02-02_                   | _EPI_ISL_118212_ | _A/HaNoi/Q094/2007_           | _EpiFluDB_ |
| 1121 2007-02-03_                   | _EPI_ISL_30204_  | _A/Taiwan/70307/2007_         | _          |
| 1122 2007-02-05_                   | _EPI_ISL_7848_   | _A/Kentucky/UR06-0158/2007_   | _          |
| 1123 2007-02-05_                   | _EPI_ISL_118213_ | _A/HaNoi/Q099/2007_           | _EpiFluDB_ |
| 1124 2007-02-06_                   | _EPI_ISL_7573_   | _A/Colorado/UR06-0206/2007_   | _          |
| 1125 2007-02-06_                   | _EPI_ISL_7948_   | _A/Oregon/UR06-0202/2007_     | _          |
| 1126 2007-02-06_                   | _EPI_ISL_7962_   | _A/Oregon/UR06-0200/2007_     | _          |
| 1127 2007-02-06_                   | _EPI_ISL_176458_ | _A/Brisbane/10/2007_          | _EpiFluDB_ |
| 1128 2007-02-08_                   | _EPI_ISL_7813_   | _A/Washington/UR06-0225/2007_ | _          |
| 1129 2007-02-08_                   | _EPI_ISL_8033_   | _A/Oregon/UR06-0221/2007_     | _          |
| 1130 2007-02-08_                   | _EPI_ISL_118112_ | _A/HaNoi/N062/2007_           | _EpiFluDB_ |
| 1131 2007-02-09_                   | _EPI_ISL_118008_ | _A/HaNoi/BM38/2007_           | _EpiFluDB_ |
| 1132 2007-02-12_                   | _EPI_ISL_7834_   | _A/Washington/UR06-0252/2007_ | _          |
| 1133 2007-02-12_                   | _EPI_ISL_8024_   | _A/Ohio/UR06-0256/2007_       | _          |
| 1134 2007-02-13_                   | _EPI_ISL_7843_   | _A/Oregon/UR06-0289/2007_     | _          |
| 1135 2007-02-13_                   | _EPI_ISL_7872_   | _A/Oregon/UR06-0273/2007_     | _          |
| 1136 2007-02-13_                   | _EPI_ISL_7878_   | _A/Oregon/UR06-0272/2007_     | _          |
| 1137 2007-02-14_                   | _EPI_ISL_7821_   | _A/Colorado/UR06-0279/2007_   | _          |
| 1138 2007-02-16_                   | _EPI_ISL_22608_  | _A/Vermont/UR06-0329/2007_    | _          |
| 1139 2007-02-19_                   | _EPI_ISL_7582_   | _A/California/UR06-0347/2007_ | _          |
| 1140 2007-02-19_                   | _EPI_ISL_7589_   | _A/Illinois/UR06-0334/2007_   | _          |
| 1141 2007-02-19_                   | _EPI_ISL_7876_   | _A/Oregon/UR06-0389/2007_     | _          |
| 1142 2007-02-19_                   | _EPI_ISL_115695_ | _A/Netherlands/69/2007_       | _EpiFluDB_ |
| 1143 2007-02-20_                   | _EPI_ISL_7807_   | _A/Texas/UR06-0356/2007_      | _          |
| 1144 2007-02-20_                   | _EPI_ISL_7933_   | _A/Texas/UR06-0358/2007_      | _          |
| 1145 2007-02-21_                   | _EPI_ISL_7633_   | _A/New_York/UR06-0373/2007_   | _          |
| 1146 2007-02-21_                   | _EPI_ISL_7642_   | _A/Kentucky/UR06-0370/2007_   | _          |
| 1147 2007-02-23_                   | _EPI_ISL_7925_   | _A/Ohio/UR06-0410/2007_       | _          |
| 1148 2007-02-24_                   | _EPI_ISL_7952_   | _A/Illinois/UR06-0402/2007_   | _          |
| 1149 2007-02-26_                   | _EPI_ISL_7635_   | _A/Texas/UR06-0418/2007_      | _          |
| 1150 2007-02-26_                   | _EPI_ISL_7826_   | _A/Colorado/UR06-0454/2007_   | _          |
| 1151 2007-02-26_                   | _EPI_ISL_7841_   | _A/Oregon/UR06-0450/2007_     | _          |
| 1152 2007-02-26_                   | _EPI_ISL_96839_  | _A/Vermont/UR06-0448/2007_    | _EpiFluDB_ |
| 1153 2007-02-27_                   | _EPI_ISL_7618_   | _A/New_York/UR06-0437/2007_   | _          |
| 1154 2007-02-27_                   | _EPI_ISL_7638_   | _A/Vermont/UR06-0470/2007_    | _          |
| 1155 2007-02-27_                   | _EPI_ISL_7641_   | _A/Illinois/UR06-0436/2007_   | _          |
| 1156 2007-02-27_                   | _EPI_ISL_7645_   | _A/Colorado/UR06-0453/2007_   | _          |
| 1157 2007-02-28_                   | _EPI_ISL_7604_   | _A/Vermont/UR06-0471/2007_    | _          |
| 1158 2007-02-28_                   | _EPI_ISL_7935_   | _A/California/UR06-0463/2007_ | _          |
| 1159 2007-02-28_                   | _EPI_ISL_15339_  | _A/Colorado/UR06-0452/2007_   | _          |
| 1160 2007-03-01_                   | _EPI_ISL_7617_   | _A/Illinois/UR06-0478/2007_   | _          |
| 1161 2007-03-01_                   | _EPI_ISL_7639_   | _A/Vermont/UR06-0486/2007_    | _          |
| 1162 2007-03-01_                   | _EPI_ISL_7658_   | _A/Alabama/UR06-0482/2007_    | _          |
| 1163 2007-03-01_                   | _EPI_ISL_7887_   | _A/Vermont/UR06-0469/2007_    | _          |
| 1164 2007-03-01_                   | _EPI_ISL_8080_   | _A/Virginia/UR06-0489/2007_   | _          |
| 1165 2007-03-02_                   | _EPI_ISL_7592_   | _A/Vermont/UR06-0484/2007_    | _          |
| 1166 2007-03-02_                   | _EPI_ISL_7622_   | _A/Texas/UR06-0480/2007_      | _          |
| 1167 2007-03-02_                   | _EPI_ISL_7637_   | _A/Vermont/UR06-0483/2007_    | _          |
| 1168 2007-03-02_                   | _EPI_ISL_7853_   | _A/Ohio/UR06-0494/2007_       | _          |
| 1169 2007-03-02_                   | _EPI_ISL_118162_ | _A/HaNoi/N71/2007_            | _EpiFluDB_ |
| 1170 2007-03-05_                   | _EPI_ISL_7581_   | _A/Vermont/UR06-0524/2007_    | _          |
| 1171 2007-03-05_                   | _EPI_ISL_7590_   | _A/New_York/UR06-0515/2007_   | _          |
| 1172 2007-03-05_                   | _EPI_ISL_7634_   | _A/New_York/UR06-0510/2007_   | _          |
| 1173 2007-03-05_                   | _EPI_ISL_23367_  | _A/Vermont/UR06-0512/2007_    | _          |
| 1174 2007-03-06_                   | _EPI_ISL_7619_   | _A/Colorado/UR06-0531/2007_   | _          |
| 1175 2007-03-06_                   | _EPI_ISL_7620_   | _A/New_York/UR06-0529/2007_   | _          |
| 1176 2007-03-06_                   | _EPI_ISL_7831_   | _A/Illinois/UR06-0528/2007_   | _          |
| 1177 2007-03-06_                   | _EPI_ISL_7936_   | _A/Illinois/UR06-0546/2007_   | _          |
| 1178 2007-03-06_                   | _EPI_ISL_118113_ | _A/HaNoi/N073/2007_           | _EpiFluDB_ |
| 1179 2007-03-06_                   | _EPI_ISL_118214_ | _A/HaNoi/Q148/2007_           | _EpiFluDB_ |
| 1180 2007-03-07_                   | _EPI_ISL_7636_   | _A/Alabama/UR06-0545/2007_    | _          |
| 1181 2007-03-07_                   | _EPI_ISL_7758_   | _A/Colorado/UR06-0535/2007_   | _          |
| 1182 2007-03-07_                   | _EPI_ISL_7769_   | _A/Colorado/UR06-0558/2007_   | _          |
| 1183 2007-03-07_                   | _EPI_ISL_7770_   | _A/Illinois/UR06-0555/2007_   | _          |
| 1184 2007-03-07_                   | _EPI_ISL_7836_   | _A/California/UR06-0565/2007_ | _          |
| 1185 2007-03-07_                   | _EPI_ISL_7936_   | _A/Colorado/UR06-0534/2007_   | _          |
| 1186 2007-03-08_                   | _EPI_ISL_7605_   | _A/Colorado/UR06-0557/2007_   | _          |
| 1187 2007-03-09_                   | _EPI_ISL_7564_   | _A/Illinois/UR06-0567/2007_   | _          |
| 1188 2007-03-09_                   | _EPI_ISL_7772_   | _A/Texas/UR06-0566/2007_      | _          |
| 1189 2007-03-10_                   | _EPI_ISL_118159_ | _A/HaNoi/N080/2007_           | _EpiFluDB_ |
| 1190 2007-03-12_                   | _EPI_ISL_7971_   | _A/Virginia/UR06-0580/2007_   | _          |
| 1191 2007-03-12_                   | _EPI_ISL_19105_  | _A/Kentucky/UR06-0571/2007_   | _          |
| 1192 2007-03-12_                   | _EPI_ISL_19106_  | _A/California/UR06-0588/2007_ | _          |
| 1193 2007-03-13_                   | _EPI_ISL_7762_   | _A/California/UR06-0589/2007_ | _          |
| 1194 2007-03-13_                   | _EPI_ISL_15355_  | _A/Virginia/UR06-0605/2007_   | _          |
| 1195 2007-03-14_                   | _EPI_ISL_7572_   | _A/Florida/UR06-0597/2007_    | _          |
| 1196 2007-03-14_                   | _EPI_ISL_8046_   | _A/Texas/UR06-0603/2007_      | _          |
| 1197 2007-03-14_                   | _EPI_ISL_15354_  | _A/Illinois/UR06-0600/2007_   | _          |
| 1198 2007-03-14_                   | _EPI_ISL_23368_  | _A/New_York/UR06-0607/2007_   | _          |
| 1199 2007-03-19_                   | _EPI_ISL_91030_  | _A/California/NHRC0001/2007_  | _EpiFluDB_ |
| 1200 2007-03-20_                   | _EPI_ISL_118215_ | _A/HaNam/Q187/2007_           | _EpiFluDB_ |
| 1201 2007-03-30_                   | _EPI_ISL_118216_ | _A/HaNoi/Q220/2007_           | _EpiFluDB_ |
| 1202 2007-03-30_                   | _EPI_ISL_120400_ | _A/Malaysia/1755590/2007_     | _EpiFluDB_ |
| 1203 2007-04-01_                   | _EPI_ISL_120403_ | _A/Malaysia/1767091/2007_     | _EpiFluDB_ |
| 1204 2007-04-02_                   | _EPI_ISL_120401_ | _A/Malaysia/1756502/2007_     | _EpiFluDB_ |
| 1205 2007-04-02_                   | _EPI_ISL_120402_ | _A/Malaysia/1756937/2007_     | _EpiFluDB_ |
| 1206 2007-04-20_                   | _EPI_ISL_120404_ | _A/Malaysia/1768035/2007_     | _EpiFluDB_ |

|                                    |                  |                                |            |
|------------------------------------|------------------|--------------------------------|------------|
| 1207 2007-04-25_                   | _EPI_ISL_120413_ | _A/Malaysia/1770921/2007_      | _EpiFluDB_ |
| 1208 2007-04-30_                   | _EPI_ISL_91031_  | _A/California/NHRC0002/2007_   | _EpiFluDB_ |
| 1209 2007-05_(Day_unknown)_        | _EPI_ISL_145696_ | _A/Singapore/872/2007_         | _EpiFluDB_ |
| 1210 2007-05-01_                   | _EPI_ISL_120405_ | _A/Malaysia/1773914/2007_      | _EpiFluDB_ |
| 1211 2007-05-10_                   | _EPI_ISL_120406_ | _A/Malaysia/1779036/2007_      | _EpiFluDB_ |
| 1212 2007-05-10_                   | _EPI_ISL_145692_ | _A/Singapore/252/2007_         | _EpiFluDB_ |
| 1213 2007-05-14_                   | _EPI_ISL_120407_ | _A/Malaysia/1781328/2007_      | _EpiFluDB_ |
| 1214 2007-05-14_                   | _EPI_ISL_151788_ | _A/Singapore/53C/2007_         | _EpiFluDB_ |
| 1215 2007-05-16_                   | _EPI_ISL_145693_ | _A/Singapore/64K/2007_         | _EpiFluDB_ |
| 1216 2007-05-16_                   | _EPI_ISL_145694_ | _A/Singapore/68Q/2007_         | _EpiFluDB_ |
| 1217 2007-05-18_                   | _EPI_ISL_145695_ | _A/Singapore/78L/2007_         | _EpiFluDB_ |
| 1218 2007-05-25_                   | _EPI_ISL_181323_ | _A/Singapore/103C/2007_        | _EpiFluDB_ |
| 1219 2007-05-25_                   | _EPI_ISL_151787_ | _A/Singapore/105L/2007_        | _EpiFluDB_ |
| 1220 2007-06-05_                   | _EPI_ISL_19698_  | _A/Managua/7/2007_             | _          |
| 1221 2007-06-05_                   | _EPI_ISL_29911_  | _A/Managua/4348.01/2007_       | _          |
| 1222 2007-06-07_                   | _EPI_ISL_25026_  | _A/Managua/3/2007_             | _          |
| 1223 2007-06-07_                   | _EPI_ISL_29472_  | _A/Managua/3616.01/2007_       | _          |
| 1224 2007-06-07_                   | _EPI_ISL_29473_  | _A/Managua/112.01/2007_        | _          |
| 1225 2007-06-11_                   | _EPI_ISL_19697_  | _A/Managua/28/2007_            | _          |
| 1226 2007-06-12_                   | _EPI_ISL_19695_  | _A/Managua/33/2007_            | _          |
| 1227 2007-06-13_                   | _EPI_ISL_22832_  | _A/Managua/5/2007_             | _          |
| 1228 2007-06-18_                   | _EPI_ISL_19699_  | _A/Managua/31/2007_            | _          |
| 1229 2007-06-20_                   | _EPI_ISL_19691_  | _A/Managua/22/2007_            | _          |
| 1230 2007-06-21_                   | _EPI_ISL_19687_  | _A/Managua/15/2007_            | _          |
| 1231 2007-06-21_                   | _EPI_ISL_19688_  | _A/Managua/16/2007_            | _          |
| 1232 2007-06-21_                   | _EPI_ISL_19693_  | _A/Managua/18/2007_            | _          |
| 1233 2007-06-21_                   | _EPI_ISL_19696_  | _A/Managua/14/2007_            | _          |
| 1234 2007-06-21_                   | _EPI_ISL_22831_  | _A/Managua/17/2007_            | _          |
| 1235 2007-06-21_                   | _EPI_ISL_25028_  | _A/Managua/21/2007_            | _          |
| 1236 2007-06-21_                   | _EPI_ISL_118160_ | _A/HaNoi/N210/2007_            | _EpiFluDB_ |
| 1237 2007-06-22_                   | _EPI_ISL_19684_  | _A/Managua/20/2007_            | _          |
| 1238 2007-06-22_                   | _EPI_ISL_19689_  | _A/Managua/29/2007_            | _          |
| 1239 2007-06-23_                   | _EPI_ISL_19692_  | _A/Managua/34/2007_            | _          |
| 1240 2007-06-23_                   | _EPI_ISL_25027_  | _A/Managua/26/2007_            | _          |
| 1241 2007-06-23_                   | _EPI_ISL_29478_  | _A/Managua/1867.01/2007_       | _          |
| 1242 2007-06-24_                   | _EPI_ISL_19685_  | _A/Managua/27/2007_            | _          |
| 1243 2007-06-24_                   | _EPI_ISL_29476_  | _A/Managua/3243.01/2007_       | _          |
| 1244 2007-06-25_                   | _EPI_ISL_118317_ | _A/TayNguyen/TN341/2007_       | _EpiFluDB_ |
| 1245 2007-06-27_                   | _EPI_ISL_19686_  | _A/Managua/32/2007_            | _          |
| 1246 2007-06-28_                   | _EPI_ISL_29646_  | _A/Managua/419.01/2007_        | _          |
| 1247 2007-06-29_                   | _EPI_ISL_118217_ | _A/HaNoi/Q464/2007_            | _EpiFluDB_ |
| 1248 2007-07-04_                   | _EPI_ISL_118318_ | _A/TayNguyen/TN367/2007_       | _EpiFluDB_ |
| 1249 2007-07-05_                   | _EPI_ISL_29474_  | _A/Managua/4127.01/2007_       | _          |
| 1250 2007-07-10_                   | _EPI_ISL_118267_ | _A/HaNoi/Q492/2007_            | _EpiFluDB_ |
| 1251 2007-07-11_                   | _EPI_ISL_118006_ | _A/HaNoi/BM171/2007_           | _EpiFluDB_ |
| 1252 2007-07-12_                   | _EPI_ISL_118268_ | _A/HaNoi/Q499/2007_            | _EpiFluDB_ |
| 1253 2007-07-24_                   | _EPI_ISL_118108_ | _A/LangSon/LS218/2007_         | _EpiFluDB_ |
| 1254 2007-07-25_                   | _EPI_ISL_118058_ | _A/HaNoi/GS0737/2007_          | _EpiFluDB_ |
| 1255 2007-07-26_                   | _EPI_ISL_118057_ | _A/HaNoi/BT251/2007_           | _EpiFluDB_ |
| 1256 2007-07-27_                   | _EPI_ISL_118059_ | _A/HaNoi/GS0738/2007_          | _EpiFluDB_ |
| 1257 2007-07-27_                   | _EPI_ISL_118269_ | _A/HaNoi/Q545/2007_            | _EpiFluDB_ |
| 1258 2007-08-03_                   | _EPI_ISL_28853_  | _A/Managua/4902.01/2007_       | _          |
| 1259 2007-08-08_                   | _EPI_ISL_118270_ | _A/HaNoi/Q578/2007_            | _EpiFluDB_ |
| 1260 2007-08-10_                   | _EPI_ISL_145697_ | _A/Singapore/139N/2007_        | _EpiFluDB_ |
| 1261 2007-08-29_                   | _EPI_ISL_118271_ | _A/HaNoi/Q638/2007_            | _EpiFluDB_ |
| 1262 2007-09-05_                   | _EPI_ISL_118272_ | _A/HaNoi/Q656/2007_            | _EpiFluDB_ |
| 1263 2007-09-12_                   | _EPI_ISL_118007_ | _A/HaNoi/BM238/2007_           | _EpiFluDB_ |
| 1264 2007-09-13_                   | _EPI_ISL_118110_ | _A/LangSon/LS281/2007_         | _EpiFluDB_ |
| 1265 2007-09-17_                   | _EPI_ISL_181324_ | _A/Singapore/238T/2007_        | _EpiFluDB_ |
| 1266 2007-10-15_                   | _EPI_ISL_118273_ | _A/HaNoi/Q769/2007_            | _EpiFluDB_ |
| 1267 2007-10-17_                   | _EPI_ISL_118161_ | _A/HaNoi/N317/2007_            | _EpiFluDB_ |
| 1268 2007-11-06_                   | _EPI_ISL_115696_ | _A/Netherlands/348/2007_       | _EpiFluDB_ |
| 1269 2007-11-12_                   | _EPI_ISL_30206_  | _A/Taiwan/2361/2007_           | _          |
| 1270 2007-11-30_                   | _EPI_ISL_118060_ | _A/Hue/H511/2007_              | _EpiFluDB_ |
| 1271 2007-12-04_                   | _EPI_ISL_118061_ | _A/Hue/H515/2007_              | _EpiFluDB_ |
| 1272 2007-12-05_                   | _EPI_ISL_118369_ | _A/HaNoi/Q924/2007_            | _EpiFluDB_ |
| 1273 2007-12-06_                   | _EPI_ISL_118062_ | _A/Hue/H519/2007_              | _EpiFluDB_ |
| 1274 2007-12-07_                   | _EPI_ISL_118063_ | _A/Hue/H521/2007_              | _EpiFluDB_ |
| 1275 2007-12-15_                   | _EPI_ISL_63358_  | _A/Boston/14/2008_             | _EpiFluDB_ |
| 1276 2007-12-18_                   | _EPI_ISL_120408_ | _A/Malaysia/1912346/2007_      | _EpiFluDB_ |
| 1277 2008_(Month_and_day_unknown)_ | _EPI_ISL_24625_  | _A/Thailand/CU-1101/2008_      | _          |
| 1278 2008_(Month_and_day_unknown)_ | _EPI_ISL_24626_  | _A/Thailand/CU-1102/2008_      | _          |
| 1279 2008_(Month_and_day_unknown)_ | _EPI_ISL_24627_  | _A/Thailand/CU-1103/2008_      | _          |
| 1280 2008_(Month_and_day_unknown)_ | _EPI_ISL_62821_  | _A/Boston/92/2008_             | _EpiFluDB_ |
| 1281 2008_(Month_and_day_unknown)_ | _EPI_ISL_66174_  | _A/Thailand/CU356/2008_        | _EpiFluDB_ |
| 1282 2008_(Month_and_day_unknown)_ | _EPI_ISL_66175_  | _A/Thailand/CU370/2008_        | _EpiFluDB_ |
| 1283 2008_(Month_and_day_unknown)_ | _EPI_ISL_66176_  | _A/Thailand/CU379/2008_        | _EpiFluDB_ |
| 1284 2008_(Month_and_day_unknown)_ | _EPI_ISL_157612_ | _A/Guangdong/ST798/2008_       | _EpiFluDB_ |
| 1285 2008-01-04_                   | _EPI_ISL_118371_ | _A/Hue/H05/2008_               | _EpiFluDB_ |
| 1286 2008-01-07_                   | _EPI_ISL_62935_  | _A/Texas/AF01/2007_            | _EpiFluDB_ |
| 1287 2008-01-07_                   | _EPI_ISL_120409_ | _A/Malaysia/1922209/2008_      | _EpiFluDB_ |
| 1288 2008-01-10_                   | _EPI_ISL_25035_  | _A/Pennsylvania/PIT12/2008_    | _          |
| 1289 2008-01-15_                   | _EPI_ISL_25023_  | _A/Pennsylvania/PIT08/2008_    | _          |
| 1290 2008-01-15_                   | _EPI_ISL_30210_  | _A/Taiwan/70120/2008_          | _          |
| 1291 2008-01-17_                   | _EPI_ISL_25022_  | _A/Pennsylvania/PIT06/2008_    | _          |
| 1292 2008-01-22_                   | _EPI_ISL_25034_  | _A/Pennsylvania/PIT05/2008_    | _          |
| 1293 2008-01-23_                   | _EPI_ISL_25021_  | _A/Pennsylvania/PIT02/2008_    | _          |
| 1294 2008-01-23_                   | _EPI_ISL_25024_  | _A/Pennsylvania/PIT22/2008_    | _          |
| 1295 2008-01-23_                   | _EPI_ISL_27625_  | _A/Pennsylvania/PIT04/2008_    | _          |
| 1296 2008-01-25_                   | _EPI_ISL_25036_  | _A/Pennsylvania/PIT20/2008_    | _          |
| 1297 2008-01-28_                   | _EPI_ISL_62774_  | _A/Boston/19/2008_             | _EpiFluDB_ |
| 1298 2008-01-28_                   | _EPI_ISL_62776_  | _A/Boston/20/2008_             | _EpiFluDB_ |
| 1299 2008-01-28_                   | _EPI_ISL_118373_ | _A/Hue/H39/2008_               | _EpiFluDB_ |
| 1300 2008-01-29_                   | _EPI_ISL_28846_  | _A/Qatar/AF02/2008_            | _          |
| 1301 2008-02-02_                   | _EPI_ISL_28847_  | _A/Kuwait/AF03/2008_           | _          |
| 1302 2008-02-06_                   | _EPI_ISL_62781_  | _A/Boston/29/2008_             | _EpiFluDB_ |
| 1303 2008-02-06_                   | _EPI_ISL_62929_  | _A/Pennsylvania/PIT34/2008_    | _EpiFluDB_ |
| 1304 2008-02-07_                   | _EPI_ISL_62783_  | _A/Boston/31/2008_             | _EpiFluDB_ |
| 1305 2008-02-08_                   | _EPI_ISL_25038_  | _A/Pennsylvania/PIT31/2008_    | _          |
| 1306 2008-02-11_                   | _EPI_ISL_25037_  | _A/Pennsylvania/PIT25/2008_    | _          |
| 1307 2008-02-11_                   | _EPI_ISL_29630_  | _A/Mississippi/UR07-0003/2008_ | _          |
| 1308 2008-02-12_                   | _EPI_ISL_28868_  | _A/Ohio/UR07-0005/2008_        | _          |
| 1309 2008-02-12_                   | _EPI_ISL_28869_  | _A/Kansas/UR07-0007/2008_      | _          |
| 1310 2008-02-13_                   | _EPI_ISL_29631_  | _A/California/UR07-0017/2008_  | _          |
| 1311 2008-02-13_                   | _EPI_ISL_62772_  | _A/Boston/1/2008_              | _EpiFluDB_ |
| 1312 2008-02-13_                   | _EPI_ISL_62786_  | _A/Boston/36/2008_             | _EpiFluDB_ |
| 1313 2008-02-13_                   | _EPI_ISL_62925_  | _A/Ohio/UR07-0013/2008_        | _EpiFluDB_ |
| 1314 2008-02-14_                   | _EPI_ISL_28870_  | _A/Ohio/UR07-0016/2008_        | _          |
| 1315 2008-02-14_                   | _EPI_ISL_28872_  | _A/Mississippi/UR07-0025/2008_ | _          |
| 1316 2008-02-14_                   | _EPI_ISL_28892_  | _A/Kentucky/UR07-0015/2008_    | _          |
| 1317 2008-02-14_                   | _EPI_ISL_29632_  | _A/Florida/UR07-0021/2008_     | _          |
| 1318 2008-02-14_                   | _EPI_ISL_29908_  | _A/Mississippi/UR07-0024/2008_ | _          |
| 1319 2008-02-14_                   | _EPI_ISL_62787_  | _A/Boston/38/2008_             | _EpiFluDB_ |
| 1320 2008-02-14_                   | _EPI_ISL_62788_  | _A/Boston/39/2008_             | _EpiFluDB_ |
| 1321 2008-02-15_                   | _EPI_ISL_29086_  | _A/Kentucky/UR07-0028/2008_    | _          |
| 1322 2008-02-15_                   | _EPI_ISL_62790_  | _A/Boston/40/2008_             | _EpiFluDB_ |
| 1323 2008-02-18_                   | _EPI_ISL_28873_  | _A/Ohio/UR07-0031/2008_        | _          |
| 1324 2008-02-18_                   | _EPI_ISL_28874_  | _A/Kentucky/UR07-0037/2008_    | _          |
| 1325 2008-02-18_                   | _EPI_ISL_28875_  | _A/Kentucky/UR07-0041/2008_    | _          |
| 1326 2008-02-18_                   | _EPI_ISL_29087_  | _A/Ohio/UR07-0035/2008_        | _          |
| 1327 2008-02-18_                   | _EPI_ISL_29669_  | _A/Ohio/UR07-0034/2008_        | _          |

|                                   |                 |                                 |                |
|-----------------------------------|-----------------|---------------------------------|----------------|
| 1328 2008-02-18                   | _EPI_ISL_29909  | _A/Kentucky/UR07-0038/2008      | ---            |
| 1329 2008-02-18                   | _EPI_ISL_62791  | _A/Boston/42/2008               | ---            |
| 1330 2008-02-19                   | _EPI_ISL_27628  | _A/Ohio/UR07-0043/2008          | _EpiFluDB      |
| 1331 2008-02-19                   | _EPI_ISL_28848  | _A/Korea/AF05/2008              | ---            |
| 1332 2008-02-19                   | _EPI_ISL_28876  | _A/California/UR07-0053/2008    | ---            |
| 1333 2008-02-19                   | _EPI_ISL_28877  | _A/Ohio/UR07-0058/2008          | ---            |
| 1334 2008-02-19                   | _EPI_ISL_29088  | _A/Kansas/UR07-0047/2008        | ---            |
| 1335 2008-02-19                   | _EPI_ISL_29089  | _A/Kentucky/UR07-0049/2008      | ---            |
| 1336 2008-02-19                   | _EPI_ISL_29671  | _A/Ohio/UR07-0045/2008          | ---            |
| 1337 2008-02-19                   | _EPI_ISL_62792  | _A/Boston/43/2008               | ---            |
| 1338 2008-02-19                   | _EPI_ISL_62793  | _A/Boston/44/2008               | _EpiFluDB      |
| 1339 2008-02-19                   | _EPI_ISL_62794  | _A/Boston/45/2008               | ---            |
| 1340 2008-02-19                   | _EPI_ISL_62795  | _A/Boston/46/2008               | _EpiFluDB      |
| 1341 2008-02-20                   | _EPI_ISL_25039  | _A/Pennsylvania/PIT43/2008      | ---            |
| 1342 2008-02-20                   | _EPI_ISL_27626  | _A/Pennsylvania/PIT42/2008      | ---            |
| 1343 2008-02-20                   | _EPI_ISL_29634  | _A/California/UR07-0067/2008    | ---            |
| 1344 2008-02-20                   | _EPI_ISL_62796  | _A/Boston/47/2008               | _EpiFluDB      |
| 1345 2008-02-20                   | _EPI_ISL_62797  | _A/Boston/48/2008               | _EpiFluDB      |
| 1346 2008-02-20                   | _EPI_ISL_62823  | _A/Boston/96/2008               | _EpiFluDB      |
| 1347 2008-02-21                   | _EPI_ISL_28878  | _A/Kentucky/UR07-0068/2008      | ---            |
| 1348 2008-02-21                   | _EPI_ISL_28896  | _A/Kentucky/UR07-0072/2008      | ---            |
| 1349 2008-02-21                   | _EPI_ISL_29470  | _A/Pennsylvania/PIT39/2008      | ---            |
| 1350 2008-02-21                   | _EPI_ISL_29636  | _A/Ohio/UR07-0073/2008          | ---            |
| 1351 2008-02-21                   | _EPI_ISL_62800  | _A/Boston/50/2008               | ---            |
| 1352 2008-02-21                   | _EPI_ISL_62801  | _A/Boston/51/2008               | _EpiFluDB      |
| 1353 2008-02-24                   | _EPI_ISL_62782  | _A/Boston/3/2008                | _EpiFluDB      |
| 1354 2008-02-24                   | _EPI_ISL_62803  | _A/Boston/55/2008               | _EpiFluDB      |
| 1355 2008-02-24                   | _EPI_ISL_62805  | _A/Boston/57/2008               | _EpiFluDB      |
| 1356 2008-02-24                   | _EPI_ISL_62806  | _A/Boston/58/2008               | _EpiFluDB      |
| 1357 2008-02-24                   | _EPI_ISL_62807  | _A/Boston/59/2008               | _EpiFluDB      |
| 1358 2008-02-25                   | _EPI_ISL_27629  | _A/New_York/UR07-0080/2008      | ---            |
| 1359 2008-02-25                   | _EPI_ISL_28879  | _A/Kentucky/UR07-0081/2008      | ---            |
| 1360 2008-02-25                   | _EPI_ISL_28897  | _A/New_York/UR07-0093/2008      | ---            |
| 1361 2008-02-25                   | _EPI_ISL_28898  | _A/Mississippi/UR07-0100/2008   | ---            |
| 1362 2008-02-25                   | _EPI_ISL_29090  | _A/Kentucky/UR07-0085/2008      | ---            |
| 1363 2008-02-25                   | _EPI_ISL_62789  | _A/Boston/4/2008                | _EpiFluDB      |
| 1364 2008-02-25                   | _EPI_ISL_62808  | _A/Boston/60/2008               | _EpiFluDB      |
| 1365 2008-02-26                   | _EPI_ISL_27630  | _A/Ohio/UR07-0089/2008          | ---            |
| 1366 2008-02-26                   | _EPI_ISL_27631  | _A/Florida/UR07-0101/2008       | ---            |
| 1367 2008-02-26                   | _EPI_ISL_28899  | _A/Florida/UR07-0102/2008       | ---            |
| 1368 2008-02-26                   | _EPI_ISL_29638  | _A/Kansas/UR07-0096/2008        | ---            |
| 1369 2008-02-26                   | _EPI_ISL_30821  | _A/Florida/UR07-0095/2008       | ---            |
| 1370 2008-02-26                   | _EPI_ISL_62799  | _A/Boston/5/2008                | _EpiFluDB      |
| 1371 2008-02-26                   | _EPI_ISL_62809  | _A/Boston/61/2008               | _EpiFluDB      |
| 1372 2008-02-26                   | _EPI_ISL_62810  | _A/Boston/62/2008               | _EpiFluDB      |
| 1373 2008-02-26                   | _EPI_ISL_62811  | _A/Boston/63/2008               | _EpiFluDB      |
| 1374 2008-02-27                   | _EPI_ISL_28881  | _A/Kentucky/UR07-0107/2008      | ---            |
| 1375 2008-02-27                   | _EPI_ISL_28882  | _A/Kentucky/UR07-0108/2008      | ---            |
| 1376 2008-02-27                   | _EPI_ISL_62813  | _A/Boston/66/2008               | _EpiFluDB      |
| 1377 2008-02-27                   | _EPI_ISL_62820  | _A/Boston/9/2008                | _EpiFluDB      |
| 1378 2008-02-28                   | _EPI_ISL_28883  | _A/Kansas/UR07-0110/2008        | ---            |
| 1379 2008-02-28                   | _EPI_ISL_28884  | _A/New_York/UR07-0111/2008      | ---            |
| 1380 2008-03-01                   | _EPI_ISL_62814  | _A/Boston/68/2008               | _EpiFluDB      |
| 1381 2008-03-02                   | _EPI_ISL_62815  | _A/Boston/71/2008               | _EpiFluDB      |
| 1382 2008-03-03                   | _EPI_ISL_29910  | _A/Kentucky/UR07-0116/2008      | ---            |
| 1383 2008-03-03                   | _EPI_ISL_62773  | _A/Boston/10/2008               | _EpiFluDB      |
| 1384 2008-03-04                   | _EPI_ISL_29091  | _A/Kentucky/UR07-0124/2008      | ---            |
| 1385 2008-03-05                   | _EPI_ISL_27632  | _A/Kansas/UR07-0135/2008        | ---            |
| 1386 2008-03-05                   | _EPI_ISL_29092  | _A/Kansas/UR07-0129/2008        | ---            |
| 1387 2008-03-05                   | _EPI_ISL_29093  | _A/Kansas/UR07-0136/2008        | ---            |
| 1388 2008-03-06                   | _EPI_ISL_27633  | _A/Ohio/UR07-0140/2008          | ---            |
| 1389 2008-03-06                   | _EPI_ISL_28901  | _A/New_York/UR07-0133/2008      | ---            |
| 1390 2008-03-10                   | _EPI_ISL_28886  | _A/Florida/UR07-0146/2008       | ---            |
| 1391 2008-03-10                   | _EPI_ISL_29639  | _A/Kentucky/UR07-0148/2008      | ---            |
| 1392 2008-03-10                   | _EPI_ISL_29640  | _A/Kentucky/UR07-0149/2008      | ---            |
| 1393 2008-03-10                   | _EPI_ISL_29641  | _A/Florida/UR07-0150/2008       | ---            |
| 1394 2008-03-10                   | _EPI_ISL_120410 | _A/Malaysia/1959864/2008        | _EpiFluDB      |
| 1395 2008-03-11                   | _EPI_ISL_62816  | _A/Boston/78/2008               | _EpiFluDB      |
| 1396 2008-03-12                   | _EPI_ISL_28887  | _A/New_York/UR07-0153/2008      | ---            |
| 1397 2008-03-12                   | _EPI_ISL_30822  | _A/Florida/UR07-0154/2008       | ---            |
| 1398 2008-03-12                   | _EPI_ISL_62817  | _A/Boston/79/2008               | _EpiFluDB      |
| 1399 2008-03-13                   | _EPI_ISL_62818  | _A/Boston/81/2008               | _EpiFluDB      |
| 1400 2008-03-14                   | _EPI_ISL_62824  | _A/Boston/97/2008               | _EpiFluDB      |
| 1401 2008-03-17                   | _EPI_ISL_62924  | _A/New_York/UR07-0160/2008      | _EpiFluDB      |
| 1402 2008-03-17                   | _EPI_ISL_120411 | _A/Malaysia/1963888/2008        | _EpiFluDB      |
| 1403 2008-03-19                   | _EPI_ISL_120412 | _A/Malaysia/1965896/2008        | _EpiFluDB      |
| 1404 2008-03-20                   | _EPI_ISL_28889  | _A/Kentucky/UR07-0164/2008      | ---            |
| 1405 2008-04-16                   | _EPI_ISL_62819  | _A/Boston/88/2008               | _EpiFluDB      |
| 1406 2008-05-11                   | _EPI_ISL_77952  | _A/Japan/WRAIR1059P/2008        | _EpiFluDB      |
| 1407 2008-06-09                   | _EPI_ISL_118372 | _A/Hue/H207/2008                | _EpiFluDB      |
| 1408 2008-09-23                   | _EPI_ISL_118415 | _A/KhanhHoa/KH363/2008          | _EpiFluDB      |
| 1409 2008-11-01                   | _EPI_ISL_144592 | _A/Mexico/24003/2008            | _EpiFluDB      |
| 1410 2008-11-01                   | _EPI_ISL_144599 | _A/Mexico/24009/2008            | _EpiFluDB      |
| 1411 2008-11-01                   | _EPI_ISL_144600 | _A/Mexico/24010/2008            | _EpiFluDB      |
| 1412 2008-11-01                   | _EPI_ISL_144601 | _A/Mexico/24011/2008            | _EpiFluDB      |
| 1413 2008-11-26                   | _EPI_ISL_118370 | _A/DaNang/DN453/2008            | _EpiFluDB      |
| 1414 2008-12-01                   | _EPI_ISL_93650  | _A/Kyrgyzstan/WRAIR1255P/2008   | _EpiFluDB      |
| 1415 2008-12-01                   | _EPI_ISL_93651  | _A/Kyrgyzstan/WRAIR1256P/2008   | _EpiFluDB      |
| 1416 2008-12-01                   | _EPI_ISL_144603 | _A/Mexico/24013/2008            | _EpiFluDB      |
| 1417 2008-12-01                   | _EPI_ISL_144604 | _A/Mexico/24014/2008            | _EpiFluDB      |
| 1418 2008-12-02                   | _EPI_ISL_144602 | _A/Mexico/24012/2008            | _EpiFluDB      |
| 1419 2008-12-08                   | _EPI_ISL_77958  | _A/Kyrgyzstan/WRAIR1121P/2008   | _EpiFluDB      |
| 1420 2008-12-10                   | _EPI_ISL_118417 | _A/KhanhHoa/KH474/2008          | _EpiFluDB      |
| 1421 2008-12-10                   | _EPI_ISL_118418 | _A/KhanhHoa/KH475/2008          | _EpiFluDB      |
| 1422 2009_(Month_and_day_unknown) | _EPI_ISL_62506  | _A/New_York/3148/2009           | _EpiFluDB      |
| 1423 2009_(Month_and_day_unknown) | _EPI_ISL_66584  | _A/Florida/22/2009              | Garten_Rebecca |
| 1424 2009_(Month_and_day_unknown) | _EPI_ISL_69716  | _A/Colombia/4335/2009           | Garten_Rebecca |
| 1425 2009_(Month_and_day_unknown) | _EPI_ISL_80380  | _A/California/YRD.363/2009      | _EpiFluDB      |
| 1426 2009_(Month_and_day_unknown) | _EPI_ISL_127625 | _A/Hong_Kong/26560/2009         | _EpiFluDB      |
| 1427 2009_(Month_and_day_unknown) | _EPI_ISL_127626 | _A/Finland/97/2009              | _EpiFluDB      |
| 1428 2009_(Month_and_day_unknown) | _EPI_ISL_127627 | _A/Finland/97/2009              | _EpiFluDB      |
| 1429 2009-01_(Day_unknown)        | _EPI_ISL_77956  | _A/Korea/WRAIR1391P/2009        | _EpiFluDB      |
| 1430 2009-01_(Day_unknown)        | _EPI_ISL_77957  | _A/Kuwait/WRAIR1143P/2009       | _EpiFluDB      |
| 1431 2009-01_(Day_unknown)        | _EPI_ISL_77963  | _A/New_Jersey/WRAIR1146P/2009   | _EpiFluDB      |
| 1432 2009-01_(Day_unknown)        | _EPI_ISL_77968  | _A/South_Dakota/WRAIR1177P/2009 | _EpiFluDB      |
| 1433 2009-01-01                   | _EPI_ISL_93641  | _A/South_Korea/WRAIR1171P/2009  | _EpiFluDB      |
| 1434 2009-01-01                   | _EPI_ISL_93647  | _A/New_Jersey/WRAIR1248P/2009   | _EpiFluDB      |
| 1435 2009-01-01                   | _EPI_ISL_93655  | _A/Kuwait/WRAIR1561P/2009       | _EpiFluDB      |
| 1436 2009-01-09                   | _EPI_ISL_77951  | _A/Japan/WRAIR1037P/2009        | _EpiFluDB      |
| 1437 2009-01-16                   | _EPI_ISL_89938  | _A/Boston/75/2009               | _EpiFluDB      |
| 1438 2009-02_(Day_unknown)        | _EPI_ISL_77940  | _A/Arizona/WRAIR1142P/2009      | _EpiFluDB      |
| 1439 2009-02_(Day_unknown)        | _EPI_ISL_77945  | _A/Delware/WRAIR1240/2009       | _EpiFluDB      |
| 1440 2009-02_(Day_unknown)        | _EPI_ISL_77950  | _A/Iraq/WRAIR1157P/2009         | _EpiFluDB      |
| 1441 2009-02_(Day_unknown)        | _EPI_ISL_77961  | _A/Nevada/WRAIR1144P/2009       | _EpiFluDB      |
| 1442 2009-02-01                   | _EPI_ISL_93642  | _A/Texas/WRAIR1239P/2009        | _EpiFluDB      |
| 1443 2009-02-01                   | _EPI_ISL_93644  | _A/Alabama/WRAIR1242P/2009      | _EpiFluDB      |
| 1444 2009-02-01                   | _EPI_ISL_93645  | _A/Iraq/WRAIR1244P/2009         | _EpiFluDB      |
| 1445 2009-02-01                   | _EPI_ISL_93648  | _A/Arkansas/WRAIR1251P/2009     | _EpiFluDB      |
| 1446 2009-02-01                   | _EPI_ISL_93649  | _A/Iraq/WRAIR1252P/2009         | _EpiFluDB      |
| 1447 2009-02-01                   | _EPI_ISL_93652  | _A/Nevada/WRAIR1258P/2009       | _EpiFluDB      |
| 1448 2009-02-01                   | _EPI_ISL_93653  | _A/Guam/WRAIR1557P/2009         | _EpiFluDB      |

|                             |                  |                                |                  |
|-----------------------------|------------------|--------------------------------|------------------|
| 1449 2009-02-01_            | _EPI_ISL_93654_  | _A/Texas/WRAIR1558P/2009_      | _EpiFluDB_       |
| 1450 2009-02-01_            | _EPI_ISL_93657_  | _A/Guam/WRAIR1670P/2009_       | _EpiFluDB_       |
| 1451 2009-02-09_            | _EPI_ISL_77953_  | _A/Japan/WRAIR1140P/2009_      | _EpiFluDB_       |
| 1452 2009-02-09_            | _EPI_ISL_77964_  | _A/New_Mexico/WRAIR1139P/2009_ | _EpiFluDB_       |
| 1453 2009-02-09_            | _EPI_ISL_77976_  | _A/Washington/WRAIR1057P/2009_ | _EpiFluDB_       |
| 1454 2009-02-12_            | _EPI_ISL_87188_  | _A/Boston/16/2009_             | _EpiFluDB_       |
| 1455 2009-02-27_            | _EPI_ISL_89943_  | _A/Boston/40/2009_             | _EpiFluDB_       |
| 1456 2009-03_(Day_unknown)_ | _EPI_ISL_77938_  | _A/Alaska/WRAIR1145P/2009_     | _EpiFluDB_       |
| 1457 2009-03_(Day_unknown)_ | _EPI_ISL_77939_  | _A/Alaska/WRAIR1172P/2009_     | _EpiFluDB_       |
| 1458 2009-03-01_            | _EPI_ISL_93656_  | _A/Arizona/WRAIR1562P/2009_    | _EpiFluDB_       |
| 1459 2009-03-05_            | _EPI_ISL_86940_  | _A/PHILIPPINES/16/2009_        | _Komadina_Naomi_ |
| 1460 2009-04-01_            | _EPI_ISL_77759_  | _A/California/VRDL265/2009_    | _EpiFluDB_       |
| 1461 2009-04-01_            | _EPI_ISL_89944_  | _A/Boston/73/2009_             | _EpiFluDB_       |
| 1462 2009-04-01_            | _EPI_ISL_144598_ | _A/Mexico/24008/2009_          | _EpiFluDB_       |
| 1463 2009-04-07_            | _EPI_ISL_103759_ | _A/Hong_Kong/2000/2009_        | _Garten_Rebecca_ |
| 1464 2009-04-07_            | _EPI_ISL_176456_ | _A/Perth/16/2009_              | _EpiFluDB_       |
| 1465 2009-04-09_            | _EPI_ISL_77955_  | _A/Korea/WRAIR1038P/2009_      | _EpiFluDB_       |
| 1466 2009-04-25_            | _EPI_ISL_77628_  | _A/California/VRDL367/2009_    | _EpiFluDB_       |
| 1467 2009-04-25_            | _EPI_ISL_77631_  | _A/California/VRDL374/2009_    | _EpiFluDB_       |
| 1468 2009-04-25_            | _EPI_ISL_77847_  | _A/California/VRDL384/2009_    | _EpiFluDB_       |
| 1469 2009-04-26_            | _EPI_ISL_62482_  | _A/New_York/1685/2009_         | _EpiFluDB_       |
| 1470 2009-04-26_            | _EPI_ISL_76118_  | _A/California/VRDL136/2009_    | _EpiFluDB_       |
| 1471 2009-04-26_            | _EPI_ISL_77846_  | _A/California/VRDL383/2009_    | _EpiFluDB_       |
| 1472 2009-04-26_            | _EPI_ISL_77849_  | _A/California/VRDL390/2009_    | _EpiFluDB_       |
| 1473 2009-04-26_            | _EPI_ISL_80058_  | _A/California/VRDL385/2009_    | _EpiFluDB_       |
| 1474 2009-04-26_            | _EPI_ISL_80059_  | _A/California/VRDL386/2009_    | _EpiFluDB_       |
| 1475 2009-04-27_            | _EPI_ISL_62480_  | _A/New_York/1670/2009_         | _EpiFluDB_       |
| 1476 2009-04-27_            | _EPI_ISL_62481_  | _A/New_York/1671/2009_         | _EpiFluDB_       |
| 1477 2009-04-27_            | _EPI_ISL_62485_  | _A/New_York/3011/2009_         | _EpiFluDB_       |
| 1478 2009-04-27_            | _EPI_ISL_62486_  | _A/New_York/3018/2009_         | _EpiFluDB_       |
| 1479 2009-04-27_            | _EPI_ISL_62489_  | _A/New_York/3060/2009_         | _EpiFluDB_       |
| 1480 2009-04-27_            | _EPI_ISL_62494_  | _A/New_York/3079/2009_         | _EpiFluDB_       |
| 1481 2009-04-27_            | _EPI_ISL_62514_  | _A/New_York/3297/2009_         | _EpiFluDB_       |
| 1482 2009-04-27_            | _EPI_ISL_76119_  | _A/California/VRDL138/2009_    | _EpiFluDB_       |
| 1483 2009-04-27_            | _EPI_ISL_76122_  | _A/California/VRDL143/2009_    | _EpiFluDB_       |
| 1484 2009-04-27_            | _EPI_ISL_76123_  | _A/California/VRDL144/2009_    | _EpiFluDB_       |
| 1485 2009-04-27_            | _EPI_ISL_76124_  | _A/California/VRDL145/2009_    | _EpiFluDB_       |
| 1486 2009-04-27_            | _EPI_ISL_76127_  | _A/California/VRDL158/2009_    | _EpiFluDB_       |
| 1487 2009-04-27_            | _EPI_ISL_77607_  | _A/California/VRDL176/2009_    | _EpiFluDB_       |
| 1488 2009-04-27_            | _EPI_ISL_77629_  | _A/California/VRDL368/2009_    | _EpiFluDB_       |
| 1489 2009-04-27_            | _EPI_ISL_77630_  | _A/California/VRDL373/2009_    | _EpiFluDB_       |
| 1490 2009-04-27_            | _EPI_ISL_77632_  | _A/California/VRDL375/2009_    | _EpiFluDB_       |
| 1491 2009-04-27_            | _EPI_ISL_77751_  | _A/California/VRDL248/2009_    | _EpiFluDB_       |
| 1492 2009-04-27_            | _EPI_ISL_77829_  | _A/California/VRDL183/2009_    | _EpiFluDB_       |
| 1493 2009-04-27_            | _EPI_ISL_77840_  | _A/California/VRDL207/2009_    | _EpiFluDB_       |
| 1494 2009-04-27_            | _EPI_ISL_77845_  | _A/California/VRDL381/2009_    | _EpiFluDB_       |
| 1495 2009-04-27_            | _EPI_ISL_77848_  | _A/California/VRDL387/2009_    | _EpiFluDB_       |
| 1496 2009-04-27_            | _EPI_ISL_89946_  | _A/Boston/99/2009_             | _EpiFluDB_       |
| 1497 2009-04-27_            | _EPI_ISL_144611_ | _A/Mexico/24025/2009_          | _EpiFluDB_       |
| 1498 2009-04-28_            | _EPI_ISL_62484_  | _A/New_York/3006/2009_         | _EpiFluDB_       |
| 1499 2009-04-28_            | _EPI_ISL_62490_  | _A/New_York/3062/2009_         | _EpiFluDB_       |
| 1500 2009-04-28_            | _EPI_ISL_62491_  | _A/New_York/3064/2009_         | _EpiFluDB_       |
| 1501 2009-04-28_            | _EPI_ISL_62497_  | _A/New_York/3103/2009_         | _EpiFluDB_       |
| 1502 2009-04-28_            | _EPI_ISL_62499_  | _A/New_York/3127/2009_         | _EpiFluDB_       |
| 1503 2009-04-28_            | _EPI_ISL_76126_  | _A/California/VRDL147/2009_    | _EpiFluDB_       |
| 1504 2009-04-28_            | _EPI_ISL_76748_  | _A/California/VRDL156/2009_    | _EpiFluDB_       |
| 1505 2009-04-28_            | _EPI_ISL_76983_  | _A/California/VRDL302/2009_    | _EpiFluDB_       |
| 1506 2009-04-28_            | _EPI_ISL_77608_  | _A/California/VRDL177/2009_    | _EpiFluDB_       |
| 1507 2009-04-28_            | _EPI_ISL_77633_  | _A/California/VRDL396/2009_    | _EpiFluDB_       |
| 1508 2009-04-28_            | _EPI_ISL_77731_  | _A/California/VRDL159/2009_    | _EpiFluDB_       |
| 1509 2009-04-28_            | _EPI_ISL_77732_  | _A/California/VRDL160/2009_    | _EpiFluDB_       |
| 1510 2009-04-28_            | _EPI_ISL_77733_  | _A/California/VRDL161/2009_    | _EpiFluDB_       |
| 1511 2009-04-28_            | _EPI_ISL_77734_  | _A/California/VRDL164/2009_    | _EpiFluDB_       |
| 1512 2009-04-28_            | _EPI_ISL_77736_  | _A/California/VRDL166/2009_    | _EpiFluDB_       |
| 1513 2009-04-28_            | _EPI_ISL_77738_  | _A/California/VRDL169/2009_    | _EpiFluDB_       |
| 1514 2009-04-28_            | _EPI_ISL_77739_  | _A/California/VRDL170/2009_    | _EpiFluDB_       |
| 1515 2009-04-28_            | _EPI_ISL_77740_  | _A/California/VRDL172/2009_    | _EpiFluDB_       |
| 1516 2009-04-28_            | _EPI_ISL_77741_  | _A/California/VRDL173/2009_    | _EpiFluDB_       |
| 1517 2009-04-28_            | _EPI_ISL_77743_  | _A/California/VRDL211/2009_    | _EpiFluDB_       |
| 1518 2009-04-28_            | _EPI_ISL_77745_  | _A/California/VRDL216/2009_    | _EpiFluDB_       |
| 1519 2009-04-28_            | _EPI_ISL_77793_  | _A/California/VRDL394/2009_    | _EpiFluDB_       |
| 1520 2009-04-28_            | _EPI_ISL_77827_  | _A/California/VRDL178/2009_    | _EpiFluDB_       |
| 1521 2009-04-28_            | _EPI_ISL_77828_  | _A/California/VRDL181/2009_    | _EpiFluDB_       |
| 1522 2009-04-28_            | _EPI_ISL_77830_  | _A/California/VRDL184/2009_    | _EpiFluDB_       |
| 1523 2009-04-28_            | _EPI_ISL_77832_  | _A/California/VRDL187/2009_    | _EpiFluDB_       |
| 1524 2009-04-28_            | _EPI_ISL_77834_  | _A/California/VRDL198/2009_    | _EpiFluDB_       |
| 1525 2009-04-28_            | _EPI_ISL_77835_  | _A/California/VRDL199/2009_    | _EpiFluDB_       |
| 1526 2009-04-28_            | _EPI_ISL_77837_  | _A/California/VRDL203/2009_    | _EpiFluDB_       |
| 1527 2009-04-28_            | _EPI_ISL_77838_  | _A/California/VRDL204/2009_    | _EpiFluDB_       |
| 1528 2009-04-28_            | _EPI_ISL_77842_  | _A/California/VRDL210/2009_    | _EpiFluDB_       |
| 1529 2009-04-28_            | _EPI_ISL_77850_  | _A/California/VRDL391/2009_    | _EpiFluDB_       |
| 1530 2009-04-28_            | _EPI_ISL_77851_  | _A/California/VRDL392/2009_    | _EpiFluDB_       |
| 1531 2009-04-28_            | _EPI_ISL_87802_  | _A/New_York/3318/2009_         | _EpiFluDB_       |
| 1532 2009-04-28_            | _EPI_ISL_91036_  | _A/California/VRDL182/2009_    | _EpiFluDB_       |
| 1533 2009-04-29_            | _EPI_ISL_62498_  | _A/New_York/3104/2009_         | _EpiFluDB_       |
| 1534 2009-04-29_            | _EPI_ISL_62502_  | _A/New_York/3139/2009_         | _EpiFluDB_       |
| 1535 2009-04-29_            | _EPI_ISL_62509_  | _A/New_York/3272/2009_         | _EpiFluDB_       |
| 1536 2009-04-29_            | _EPI_ISL_62510_  | _A/New_York/3273/2009_         | _EpiFluDB_       |
| 1537 2009-04-29_            | _EPI_ISL_76980_  | _A/California/VRDL241/2009_    | _EpiFluDB_       |
| 1538 2009-04-29_            | _EPI_ISL_77735_  | _A/California/VRDL165/2009_    | _EpiFluDB_       |
| 1539 2009-04-29_            | _EPI_ISL_77737_  | _A/California/VRDL168/2009_    | _EpiFluDB_       |
| 1540 2009-04-29_            | _EPI_ISL_77742_  | _A/California/VRDL188/2009_    | _EpiFluDB_       |
| 1541 2009-04-29_            | _EPI_ISL_77744_  | _A/California/VRDL212/2009_    | _EpiFluDB_       |
| 1542 2009-04-29_            | _EPI_ISL_77746_  | _A/California/VRDL230/2009_    | _EpiFluDB_       |
| 1543 2009-04-29_            | _EPI_ISL_77748_  | _A/California/VRDL233/2009_    | _EpiFluDB_       |
| 1544 2009-04-29_            | _EPI_ISL_77749_  | _A/California/VRDL243/2009_    | _EpiFluDB_       |
| 1545 2009-04-29_            | _EPI_ISL_77750_  | _A/California/VRDL247/2009_    | _EpiFluDB_       |
| 1546 2009-04-29_            | _EPI_ISL_77752_  | _A/California/VRDL250/2009_    | _EpiFluDB_       |
| 1547 2009-04-29_            | _EPI_ISL_77754_  | _A/California/VRDL259/2009_    | _EpiFluDB_       |
| 1548 2009-04-29_            | _EPI_ISL_77772_  | _A/California/VRDL308/2009_    | _EpiFluDB_       |
| 1549 2009-04-29_            | _EPI_ISL_77831_  | _A/California/VRDL185/2009_    | _EpiFluDB_       |
| 1550 2009-04-29_            | _EPI_ISL_77833_  | _A/California/VRDL196/2009_    | _EpiFluDB_       |
| 1551 2009-04-29_            | _EPI_ISL_77836_  | _A/California/VRDL201/2009_    | _EpiFluDB_       |
| 1552 2009-04-29_            | _EPI_ISL_77839_  | _A/California/VRDL205/2009_    | _EpiFluDB_       |
| 1553 2009-04-29_            | _EPI_ISL_77841_  | _A/California/VRDL208/2009_    | _EpiFluDB_       |
| 1554 2009-04-29_            | _EPI_ISL_77843_  | _A/California/VRDL246/2009_    | _EpiFluDB_       |
| 1555 2009-04-29_            | _EPI_ISL_77852_  | _A/California/VRDL393/2009_    | _EpiFluDB_       |
| 1556 2009-04-29_            | _EPI_ISL_91039_  | _A/California/VRDL197/2009_    | _EpiFluDB_       |
| 1557 2009-04-29_            | _EPI_ISL_91040_  | _A/California/VRDL242/2009_    | _EpiFluDB_       |
| 1558 2009-04-29_            | _EPI_ISL_91041_  | _A/California/VRDL255/2009_    | _EpiFluDB_       |
| 1559 2009-04-30_            | _EPI_ISL_62495_  | _A/New_York/3087/2009_         | _EpiFluDB_       |
| 1560 2009-04-30_            | _EPI_ISL_62503_  | _A/New_York/3143/2009_         | _EpiFluDB_       |
| 1561 2009-04-30_            | _EPI_ISL_76982_  | _A/California/VRDL296/2009_    | _EpiFluDB_       |
| 1562 2009-04-30_            | _EPI_ISL_77609_  | _A/California/VRDL286/2009_    | _EpiFluDB_       |
| 1563 2009-04-30_            | _EPI_ISL_77611_  | _A/California/VRDL288/2009_    | _EpiFluDB_       |
| 1564 2009-04-30_            | _EPI_ISL_77747_  | _A/California/VRDL231/2009_    | _EpiFluDB_       |
| 1565 2009-04-30_            | _EPI_ISL_77753_  | _A/California/VRDL253/2009_    | _EpiFluDB_       |
| 1566 2009-04-30_            | _EPI_ISL_77758_  | _A/California/VRDL263/2009_    | _EpiFluDB_       |
| 1567 2009-04-30_            | _EPI_ISL_77760_  | _A/California/VRDL266/2009_    | _EpiFluDB_       |
| 1568 2009-04-30_            | _EPI_ISL_77761_  | _A/California/VRDL268/2009_    | _EpiFluDB_       |
| 1569 2009-04-30_            | _EPI_ISL_77762_  | _A/California/VRDL271/2009_    | _EpiFluDB_       |

|                             |                 |                                 |                  |
|-----------------------------|-----------------|---------------------------------|------------------|
| 1570 2009-04-30             | _EPI_ISL_77763  | _A/California/VRDL272/2009_     | _EpiFluDB_       |
| 1571 2009-04-30             | _EPI_ISL_77764  | _A/California/VRDL274/2009_     | _EpiFluDB_       |
| 1572 2009-04-30             | _EPI_ISL_77765  | _A/California/VRDL277/2009_     | _EpiFluDB_       |
| 1573 2009-04-30             | _EPI_ISL_77766  | _A/California/VRDL278/2009_     | _EpiFluDB_       |
| 1574 2009-04-30             | _EPI_ISL_77767  | _A/California/VRDL279/2009_     | _EpiFluDB_       |
| 1575 2009-04-30             | _EPI_ISL_77768  | _A/California/VRDL285/2009_     | _EpiFluDB_       |
| 1576 2009-04-30             | _EPI_ISL_77769  | _A/California/VRDL293/2009_     | _EpiFluDB_       |
| 1577 2009-04-30             | _EPI_ISL_77770  | _A/California/VRDL294/2009_     | _EpiFluDB_       |
| 1578 2009-04-30             | _EPI_ISL_77774  | _A/California/VRDL310/2009_     | _EpiFluDB_       |
| 1579 2009-04-30             | _EPI_ISL_77844  | _A/California/VRDL269/2009_     | _EpiFluDB_       |
| 1580 2009-05_(Day_unknown)_ | _EPI_ISL_77946  | _A/Florida/WRAIR1039P/2009_     | _EpiFluDB_       |
| 1581 2009-05-01             | _EPI_ISL_62504  | _A/New_York/3146/2009_          | _EpiFluDB_       |
| 1582 2009-05-01             | _EPI_ISL_62508  | _A/New_York/3164/2009_          | _EpiFluDB_       |
| 1583 2009-05-01             | _EPI_ISL_71883  | _A/New_York/3316/2009_          | _EpiFluDB_       |
| 1584 2009-05-01             | _EPI_ISL_76981  | _A/California/VRDL291/2009_     | _EpiFluDB_       |
| 1585 2009-05-01             | _EPI_ISL_76986  | _A/California/VRDL314/2009_     | _EpiFluDB_       |
| 1586 2009-05-01             | _EPI_ISL_77755  | _A/California/VRDL260/2009_     | _EpiFluDB_       |
| 1587 2009-05-01             | _EPI_ISL_77771  | _A/California/VRDL305/2009_     | _EpiFluDB_       |
| 1588 2009-05-01             | _EPI_ISL_77775  | _A/California/VRDL312/2009_     | _EpiFluDB_       |
| 1589 2009-05-01             | _EPI_ISL_77776  | _A/California/VRDL313/2009_     | _EpiFluDB_       |
| 1590 2009-05-01             | _EPI_ISL_77777  | _A/California/VRDL315/2009_     | _EpiFluDB_       |
| 1591 2009-05-01             | _EPI_ISL_91042  | _A/California/VRDL257/2009_     | _EpiFluDB_       |
| 1592 2009-05-01             | _EPI_ISL_93643  | _A/Florida/WRAIR1241P/2009_     | _EpiFluDB_       |
| 1593 2009-05-01             | _EPI_ISL_93646  | _A/Colorado/WRAIR1246P/2009_    | _EpiFluDB_       |
| 1594 2009-05-02             | _EPI_ISL_62500  | _A/New_York/3135/2009_          | _EpiFluDB_       |
| 1595 2009-05-02             | _EPI_ISL_62501  | _A/New_York/3137/2009_          | _EpiFluDB_       |
| 1596 2009-05-02             | _EPI_ISL_76985  | _A/California/VRDL307/2009_     | _EpiFluDB_       |
| 1597 2009-05-02             | _EPI_ISL_77756  | _A/California/VRDL261/2009_     | _EpiFluDB_       |
| 1598 2009-05-02             | _EPI_ISL_77773  | _A/California/VRDL309/2009_     | _EpiFluDB_       |
| 1599 2009-05-03             | _EPI_ISL_62513  | _A/New_York/3280/2009_          | _EpiFluDB_       |
| 1600 2009-05-03             | _EPI_ISL_77783  | _A/California/VRDL325/2009_     | _EpiFluDB_       |
| 1601 2009-05-03             | _EPI_ISL_77790  | _A/California/VRDL335/2009_     | _EpiFluDB_       |
| 1602 2009-05-04             | _EPI_ISL_76987  | _A/California/VRDL316/2009_     | _EpiFluDB_       |
| 1603 2009-05-04             | _EPI_ISL_77610  | _A/California/VRDL287/2009_     | _EpiFluDB_       |
| 1604 2009-05-04             | _EPI_ISL_77613  | _A/California/VRDL339/2009_     | _EpiFluDB_       |
| 1605 2009-05-04             | _EPI_ISL_77614  | _A/California/VRDL340/2009_     | _EpiFluDB_       |
| 1606 2009-05-04             | _EPI_ISL_77781  | _A/California/VRDL321/2009_     | _EpiFluDB_       |
| 1607 2009-05-04             | _EPI_ISL_77782  | _A/California/VRDL322/2009_     | _EpiFluDB_       |
| 1608 2009-05-04             | _EPI_ISL_87275  | _A/New_York/3421/2009_          | _EpiFluDB_       |
| 1609 2009-05-05             | _EPI_ISL_62515  | _A/New_York/3309/2009_          | _EpiFluDB_       |
| 1610 2009-05-05             | _EPI_ISL_77791  | _A/California/VRDL336/2009_     | _EpiFluDB_       |
| 1611 2009-05-06             | _EPI_ISL_71884  | _A/New_York/3360/2009_          | _EpiFluDB_       |
| 1612 2009-05-06             | _EPI_ISL_77778  | _A/California/VRDL317/2009_     | _EpiFluDB_       |
| 1613 2009-05-06             | _EPI_ISL_77779  | _A/California/VRDL318/2009_     | _EpiFluDB_       |
| 1614 2009-05-06             | _EPI_ISL_77780  | _A/California/VRDL319/2009_     | _EpiFluDB_       |
| 1615 2009-05-06             | _EPI_ISL_77788  | _A/California/VRDL333/2009_     | _EpiFluDB_       |
| 1616 2009-05-06             | _EPI_ISL_87803  | _A/New_York/3417/2009_          | _EpiFluDB_       |
| 1617 2009-05-07             | _EPI_ISL_76984  | _A/California/VRDL304/2009_     | _EpiFluDB_       |
| 1618 2009-05-09             | _EPI_ISL_77612  | _A/California/VRDL328/2009_     | _EpiFluDB_       |
| 1619 2009-05-09             | _EPI_ISL_77785  | _A/California/VRDL329/2009_     | _EpiFluDB_       |
| 1620 2009-05-09             | _EPI_ISL_78725  | _A/California/VRDL330/2009_     | _EpiFluDB_       |
| 1621 2009-05-11             | _EPI_ISL_62521  | _A/New_York/3487/2009_          | _EpiFluDB_       |
| 1622 2009-05-11             | _EPI_ISL_62522  | _A/New_York/3491/2009_          | _EpiFluDB_       |
| 1623 2009-05-11             | _EPI_ISL_77616  | _A/California/VRDL343/2009_     | _EpiFluDB_       |
| 1624 2009-05-11             | _EPI_ISL_77621  | _A/California/VRDL352/2009_     | _EpiFluDB_       |
| 1625 2009-05-11             | _EPI_ISL_77623  | _A/California/VRDL355/2009_     | _EpiFluDB_       |
| 1626 2009-05-11             | _EPI_ISL_77784  | _A/California/VRDL327/2009_     | _EpiFluDB_       |
| 1627 2009-05-11             | _EPI_ISL_77786  | _A/California/VRDL331/2009_     | _EpiFluDB_       |
| 1628 2009-05-11             | _EPI_ISL_77787  | _A/California/VRDL332/2009_     | _EpiFluDB_       |
| 1629 2009-05-11             | _EPI_ISL_89945  | _A/Boston/97/2009_              | _EpiFluDB_       |
| 1630 2009-05-13             | _EPI_ISL_62523  | _A/New_York/3496/2009_          | _EpiFluDB_       |
| 1631 2009-05-13             | _EPI_ISL_71885  | _A/New_York/3494/2009_          | _EpiFluDB_       |
| 1632 2009-05-15             | _EPI_ISL_87277  | _A/New_York/3519/2009_          | _EpiFluDB_       |
| 1633 2009-05-16             | _EPI_ISL_87276  | _A/New_York/3470/2009_          | _EpiFluDB_       |
| 1634 2009-05-17             | _EPI_ISL_74079  | _A/Bangladesh/S014/2009_        | _Garten_Rebecca_ |
| 1635 2009-05-18             | _EPI_ISL_71886  | _A/New_York/3527/2009_          | _EpiFluDB_       |
| 1636 2009-05-18             | _EPI_ISL_77789  | _A/California/VRDL334/2009_     | _EpiFluDB_       |
| 1637 2009-05-18             | _EPI_ISL_77792  | _A/California/VRDL338/2009_     | _EpiFluDB_       |
| 1638 2009-05-19             | _EPI_ISL_71887  | _A/New_York/3626/2009_          | _EpiFluDB_       |
| 1639 2009-05-19             | _EPI_ISL_77617  | _A/California/VRDL344/2009_     | _EpiFluDB_       |
| 1640 2009-05-20             | _EPI_ISL_62526  | _A/New_York/3738/2009_          | _EpiFluDB_       |
| 1641 2009-05-20             | _EPI_ISL_68198  | _A/New_York/3743/2009_          | _EpiFluDB_       |
| 1642 2009-05-20             | _EPI_ISL_77615  | _A/California/VRDL342/2009_     | _EpiFluDB_       |
| 1643 2009-05-21             | _EPI_ISL_89636  | _A/New_York/3750/2009_          | _EpiFluDB_       |
| 1644 2009-05-22             | _EPI_ISL_142968 | _A/Singapore/H2009.389b/2009_   | _EpiFluDB_       |
| 1645 2009-05-22             | _EPI_ISL_143044 | _A/Singapore/H2009.389b/2009_   | _EpiFluDB_       |
| 1646 2009-05-23             | _EPI_ISL_77620  | _A/California/VRDL351/2009_     | _EpiFluDB_       |
| 1647 2009-05-23             | _EPI_ISL_80057  | _A/California/VRDL347/2009_     | _EpiFluDB_       |
| 1648 2009-05-23             | _EPI_ISL_87278  | _A/New_York/3644/2009_          | _EpiFluDB_       |
| 1649 2009-05-24             | _EPI_ISL_71889  | _A/New_York/A255/2009_          | _EpiFluDB_       |
| 1650 2009-05-26             | _EPI_ISL_66606  | _A/Philippines/2191/2009_       | _Garten_Rebecca_ |
| 1651 2009-05-26             | _EPI_ISL_77618  | _A/California/VRDL345/2009_     | _EpiFluDB_       |
| 1652 2009-05-26             | _EPI_ISL_77619  | _A/California/VRDL349/2009_     | _EpiFluDB_       |
| 1653 2009-05-26             | _EPI_ISL_77622  | _A/California/VRDL354/2009_     | _EpiFluDB_       |
| 1654 2009-06-01             | _EPI_ISL_62527  | _A/New_York/3752/2009_          | _EpiFluDB_       |
| 1655 2009-06-01             | _EPI_ISL_98859  | _A/Guangdong-Luohu/1256/2009_   | _Garten_Rebecca_ |
| 1656 2009-06-02             | _EPI_ISL_66559  | _A/Victoria/208/2009_           | _Garten_Rebecca_ |
| 1657 2009-06-02             | _EPI_ISL_84670  | _A/California/VRDL356/2009_     | _EpiFluDB_       |
| 1658 2009-06-03             | _EPI_ISL_77625  | _A/California/VRDL360/2009_     | _EpiFluDB_       |
| 1659 2009-06-04             | _EPI_ISL_87282  | _A/New_York/3932/2009_          | _EpiFluDB_       |
| 1660 2009-06-04             | _EPI_ISL_87804  | _A/New_York/3904/2009_          | _EpiFluDB_       |
| 1661 2009-06-05             | _EPI_ISL_77624  | _A/California/VRDL357/2009_     | _EpiFluDB_       |
| 1662 2009-06-05             | _EPI_ISL_87805  | _A/New_York/3918/2009_          | _EpiFluDB_       |
| 1663 2009-06-08             | _EPI_ISL_89635  | _A/California/VRDL359/2009_     | _EpiFluDB_       |
| 1664 2009-06-12             | _EPI_ISL_68199  | _A/New_York/A165/2009_          | _EpiFluDB_       |
| 1665 2009-06-13             | _EPI_ISL_66166  | _A/Thailand/CU-84/2009_         | _EpiFluDB_       |
| 1666 2009-06-17             | _EPI_ISL_70623  | _A/Thailand/CU-H16/2009_        | _EpiFluDB_       |
| 1667 2009-06-22             | _EPI_ISL_66164  | _A/Thailand/CU-8106/2009_       | _EpiFluDB_       |
| 1668 2009-06-23             | _EPI_ISL_66165  | _A/Thailand/CU-8110/2009_       | _EpiFluDB_       |
| 1669 2009-06-23             | _EPI_ISL_77626  | _A/California/VRDL361/2009_     | _EpiFluDB_       |
| 1670 2009-06-23             | _EPI_ISL_87806  | _A/New_York/A362/2009_          | _EpiFluDB_       |
| 1671 2009-06-24             | _EPI_ISL_120414 | _A/Malaysia/2205714/2009_       | _EpiFluDB_       |
| 1672 2009-06-26             | _EPI_ISL_142941 | _A/Singapore/C2009.485a/2009_   | _EpiFluDB_       |
| 1673 2009-06-26             | _EPI_ISL_142942 | _A/Singapore/C2009.485b/2009_   | _EpiFluDB_       |
| 1674 2009-06-26             | _EPI_ISL_142971 | _A/Singapore/H2009.485/2009_    | _EpiFluDB_       |
| 1675 2009-06-26             | _EPI_ISL_143014 | _A/Singapore/C2009.485a/2009_   | _EpiFluDB_       |
| 1676 2009-06-26             | _EPI_ISL_143015 | _A/Singapore/C2009.485b/2009_   | _EpiFluDB_       |
| 1677 2009-06-26             | _EPI_ISL_143045 | _A/Singapore/H2009.485/2009_    | _EpiFluDB_       |
| 1678 2009-06-29             | _EPI_ISL_77944  | _A/Dakar/WRAIR0011T/2009_       | _EpiFluDB_       |
| 1679 2009-06-30             | _EPI_ISL_102611 | _A/Hong_Kong/H090-662-V10/2009_ | _EpiFluDB_       |
| 1680 2009-06-30             | _EPI_ISL_116438 | _A/Hong_Kong/H090-662-V10/2009_ | _EpiFluDB_       |
| 1681 2009-06-30             | _EPI_ISL_142940 | _A/Singapore/C2009.496/2009_    | _EpiFluDB_       |
| 1682 2009-06-30             | _EPI_ISL_143012 | _A/Singapore/C2009.496/2009_    | _EpiFluDB_       |
| 1683 2009-07-04             | _EPI_ISL_102622 | _A/Hong_Kong/H090-669-V10/2009_ | _EpiFluDB_       |
| 1684 2009-07-04             | _EPI_ISL_116439 | _A/Hong_Kong/H090-669-V10/2009_ | _EpiFluDB_       |
| 1685 2009-07-05             | _EPI_ISL_142973 | _A/Singapore/H2009.510/2009_    | _EpiFluDB_       |
| 1686 2009-07-05             | _EPI_ISL_143046 | _A/Singapore/H2009.510/2009_    | _EpiFluDB_       |
| 1687 2009-07-06             | _EPI_ISL_102623 | _A/Hong_Kong/H090-671-V10/2009_ | _EpiFluDB_       |
| 1688 2009-07-06             | _EPI_ISL_102635 | _A/Hong_Kong/H090-672-V10/2009_ | _EpiFluDB_       |
| 1689 2009-07-06             | _EPI_ISL_116440 | _A/Hong_Kong/H090-671-V10/2009_ | _EpiFluDB_       |
| 1690 2009-07-06             | _EPI_ISL_116441 | _A/Hong_Kong/H090-672-V10/2009_ | _EpiFluDB_       |

|                                    |                  |                                 |                  |
|------------------------------------|------------------|---------------------------------|------------------|
| 1691 2009-07-07_                   | _EPI_ISL_102636_ | _A/Hong_Kong/H090-674-V10/2009_ | _EpiFluDB_       |
| 1692 2009-07-07_                   | _EPI_ISL_116442_ | _A/Hong_Kong/H090-674-V10/2009_ | _EpiFluDB_       |
| 1693 2009-07-07_                   | _EPI_ISL_142943_ | _A/Singapore/C2009.515/2009_    | _EpiFluDB_       |
| 1694 2009-07-07_                   | _EPI_ISL_143016_ | _A/Singapore/C2009.515/2009_    | _EpiFluDB_       |
| 1695 2009-07-08_                   | _EPI_ISL_142974_ | _A/Singapore/H2009.518/2009_    | _EpiFluDB_       |
| 1696 2009-07-08_                   | _EPI_ISL_143047_ | _A/Singapore/H2009.518/2009_    | _EpiFluDB_       |
| 1697 2009-07-09_                   | _EPI_ISL_102648_ | _A/Hong_Kong/H090-689-V10/2009_ | _EpiFluDB_       |
| 1698 2009-07-09_                   | _EPI_ISL_116489_ | _A/Hong_Kong/H090-689-V10/2009_ | _EpiFluDB_       |
| 1699 2009-07-10_                   | _EPI_ISL_102647_ | _A/Hong_Kong/H090-688-V10/2009_ | _EpiFluDB_       |
| 1700 2009-07-10_                   | _EPI_ISL_102662_ | _A/Hong_Kong/H090-692-V10/2009_ | _EpiFluDB_       |
| 1701 2009-07-10_                   | _EPI_ISL_102678_ | _A/Hong_Kong/H090-692-V12/2009_ | _EpiFluDB_       |
| 1702 2009-07-10_                   | _EPI_ISL_102679_ | _A/Hong_Kong/H090-695-V10/2009_ | _EpiFluDB_       |
| 1703 2009-07-10_                   | _EPI_ISL_116488_ | _A/Hong_Kong/H090-688-V10/2009_ | _EpiFluDB_       |
| 1704 2009-07-10_                   | _EPI_ISL_116492_ | _A/Hong_Kong/H090-692-V10/2009_ | _EpiFluDB_       |
| 1705 2009-07-10_                   | _EPI_ISL_116493_ | _A/Hong_Kong/H090-695-V10/2009_ | _EpiFluDB_       |
| 1706 2009-07-11_                   | _EPI_ISL_66169_  | _A/Thailand/CU-8590/2009_       | _EpiFluDB_       |
| 1707 2009-07-11_                   | _EPI_ISL_66170_  | _A/Thailand/CU-8657/2009_       | _EpiFluDB_       |
| 1708 2009-07-12_                   | _EPI_ISL_102657_ | _A/Hong_Kong/H090-689-V20/2009_ | _EpiFluDB_       |
| 1709 2009-07-12_                   | _EPI_ISL_102658_ | _A/Hong_Kong/H090-689-V22/2009_ | _EpiFluDB_       |
| 1710 2009-07-12_                   | _EPI_ISL_116490_ | _A/Hong_Kong/H090-689-V20/2009_ | _EpiFluDB_       |
| 1711 2009-07-12_                   | _EPI_ISL_116491_ | _A/Hong_Kong/H090-689-V22/2009_ | _EpiFluDB_       |
| 1712 2009-07-14_                   | _EPI_ISL_102699_ | _A/Hong_Kong/H090-707-V10/2009_ | _EpiFluDB_       |
| 1713 2009-07-14_                   | _EPI_ISL_102700_ | _A/Hong_Kong/H090-710-V10/2009_ | _EpiFluDB_       |
| 1714 2009-07-14_                   | _EPI_ISL_116578_ | _A/Hong_Kong/H090-707-V10/2009_ | _EpiFluDB_       |
| 1715 2009-07-14_                   | _EPI_ISL_116579_ | _A/Hong_Kong/H090-710-V10/2009_ | _EpiFluDB_       |
| 1716 2009-07-15_                   | _EPI_ISL_102713_ | _A/Hong_Kong/H090-714-V10/2009_ | _EpiFluDB_       |
| 1717 2009-07-15_                   | _EPI_ISL_116580_ | _A/Hong_Kong/H090-714-V10/2009_ | _EpiFluDB_       |
| 1718 2009-07-17_                   | _EPI_ISL_102698_ | _A/Hong_Kong/H090-703-V10/2009_ | _EpiFluDB_       |
| 1719 2009-07-17_                   | _EPI_ISL_116577_ | _A/Hong_Kong/H090-703-V10/2009_ | _EpiFluDB_       |
| 1720 2009-07-18_                   | _EPI_ISL_102715_ | _A/Hong_Kong/H090-720-V10/2009_ | _EpiFluDB_       |
| 1721 2009-07-18_                   | _EPI_ISL_116581_ | _A/Hong_Kong/H090-720-V10/2009_ | _EpiFluDB_       |
| 1722 2009-07-20_                   | _EPI_ISL_102739_ | _A/Hong_Kong/H090-724-V10/2009_ | _EpiFluDB_       |
| 1723 2009-07-20_                   | _EPI_ISL_102751_ | _A/Hong_Kong/H090-725-V10/2009_ | _EpiFluDB_       |
| 1724 2009-07-20_                   | _EPI_ISL_102766_ | _A/Hong_Kong/H090-726-V10/2009_ | _EpiFluDB_       |
| 1725 2009-07-20_                   | _EPI_ISL_116628_ | _A/Hong_Kong/H090-724-V10/2009_ | _EpiFluDB_       |
| 1726 2009-07-20_                   | _EPI_ISL_116630_ | _A/Hong_Kong/H090-725-V10/2009_ | _EpiFluDB_       |
| 1727 2009-07-20_                   | _EPI_ISL_116631_ | _A/Hong_Kong/H090-726-V10/2009_ | _EpiFluDB_       |
| 1728 2009-07-21_                   | _EPI_ISL_74159_  | _A/Australia/19/2009_           | _EpiFluDB_       |
| 1729 2009-07-21_                   | _EPI_ISL_76747_  | _A/Australia/18/2009_           | _EpiFluDB_       |
| 1730 2009-07-21_                   | _EPI_ISL_87160_  | _A/Australia/22/2009_           | _EpiFluDB_       |
| 1731 2009-07-21_                   | _EPI_ISL_102728_ | _A/Hong_Kong/H090-720-V20/2009_ | _EpiFluDB_       |
| 1732 2009-07-21_                   | _EPI_ISL_102729_ | _A/Hong_Kong/H090-720-V21/2009_ | _EpiFluDB_       |
| 1733 2009-07-21_                   | _EPI_ISL_102767_ | _A/Hong_Kong/H090-727-V10/2009_ | _EpiFluDB_       |
| 1734 2009-07-21_                   | _EPI_ISL_102783_ | _A/Hong_Kong/H090-729-V10/2009_ | _EpiFluDB_       |
| 1735 2009-07-21_                   | _EPI_ISL_116582_ | _A/Hong_Kong/H090-720-V20/2009_ | _EpiFluDB_       |
| 1736 2009-07-21_                   | _EPI_ISL_116632_ | _A/Hong_Kong/H090-729-V10/2009_ | _EpiFluDB_       |
| 1737 2009-07-21_                   | _EPI_ISL_116583_ | _A/Hong_Kong/H090-720-V21/2009_ | _EpiFluDB_       |
| 1738 2009-07-22_                   | _EPI_ISL_102750_ | _A/Hong_Kong/H090-724-V20/2009_ | _EpiFluDB_       |
| 1739 2009-07-22_                   | _EPI_ISL_102784_ | _A/Hong_Kong/H090-733-V10/2009_ | _EpiFluDB_       |
| 1740 2009-07-22_                   | _EPI_ISL_102801_ | _A/Hong_Kong/H090-734-V10/2009_ | _EpiFluDB_       |
| 1741 2009-07-22_                   | _EPI_ISL_116629_ | _A/Hong_Kong/H090-724-V20/2009_ | _EpiFluDB_       |
| 1742 2009-07-22_                   | _EPI_ISL_116673_ | _A/Hong_Kong/H090-733-V10/2009_ | _EpiFluDB_       |
| 1743 2009-07-22_                   | _EPI_ISL_116674_ | _A/Hong_Kong/H090-734-V10/2009_ | _EpiFluDB_       |
| 1744 2009-07-23_                   | _EPI_ISL_87161_  | _A/Australia/30/2009_           | _EpiFluDB_       |
| 1745 2009-07-23_                   | _EPI_ISL_102814_ | _A/Hong_Kong/H090-736-V10/2009_ | _EpiFluDB_       |
| 1746 2009-07-23_                   | _EPI_ISL_102815_ | _A/Hong_Kong/H090-737-V10/2009_ | _EpiFluDB_       |
| 1747 2009-07-23_                   | _EPI_ISL_102828_ | _A/Hong_Kong/H090-739-V10/2009_ | _EpiFluDB_       |
| 1748 2009-07-23_                   | _EPI_ISL_116677_ | _A/Hong_Kong/H090-736-V10/2009_ | _EpiFluDB_       |
| 1749 2009-07-23_                   | _EPI_ISL_116678_ | _A/Hong_Kong/H090-737-V10/2009_ | _EpiFluDB_       |
| 1750 2009-07-23_                   | _EPI_ISL_116726_ | _A/Hong_Kong/H090-739-V10/2009_ | _EpiFluDB_       |
| 1751 2009-07-24_                   | _EPI_ISL_87162_  | _A/Australia/34/2009_           | _EpiFluDB_       |
| 1752 2009-07-24_                   | _EPI_ISL_102738_ | _A/Hong_Kong/H090-720-V31/2009_ | _EpiFluDB_       |
| 1753 2009-07-24_                   | _EPI_ISL_102802_ | _A/Hong_Kong/H090-734-V20/2009_ | _EpiFluDB_       |
| 1754 2009-07-24_                   | _EPI_ISL_102870_ | _A/Hong_Kong/H090-741-V10/2009_ | _EpiFluDB_       |
| 1755 2009-07-24_                   | _EPI_ISL_116627_ | _A/Hong_Kong/H090-720-V31/2009_ | _EpiFluDB_       |
| 1756 2009-07-24_                   | _EPI_ISL_116675_ | _A/Hong_Kong/H090-734-V20/2009_ | _EpiFluDB_       |
| 1757 2009-07-24_                   | _EPI_ISL_116730_ | _A/Hong_Kong/H090-741-V10/2009_ | _EpiFluDB_       |
| 1758 2009-07-27_                   | _EPI_ISL_102803_ | _A/Hong_Kong/H090-734-V32/2009_ | _EpiFluDB_       |
| 1759 2009-07-27_                   | _EPI_ISL_102829_ | _A/Hong_Kong/H090-739-V22/2009_ | _EpiFluDB_       |
| 1760 2009-07-27_                   | _EPI_ISL_102845_ | _A/Hong_Kong/H090-739-V23/2009_ | _EpiFluDB_       |
| 1761 2009-07-27_                   | _EPI_ISL_116676_ | _A/Hong_Kong/H090-734-V32/2009_ | _EpiFluDB_       |
| 1762 2009-07-27_                   | _EPI_ISL_116727_ | _A/Hong_Kong/H090-739-V22/2009_ | _EpiFluDB_       |
| 1763 2009-07-27_                   | _EPI_ISL_116728_ | _A/Hong_Kong/H090-739-V23/2009_ | _EpiFluDB_       |
| 1764 2009-07-28_                   | _EPI_ISL_102871_ | _A/Hong_Kong/H090-747-V10/2009_ | _EpiFluDB_       |
| 1765 2009-07-28_                   | _EPI_ISL_116731_ | _A/Hong_Kong/H090-747-V10/2009_ | _EpiFluDB_       |
| 1766 2009-07-29_                   | _EPI_ISL_93638_  | _A/Dakar/WRAIR0013N/2009_       | _EpiFluDB_       |
| 1767 2009-07-29_                   | _EPI_ISL_102846_ | _A/Hong_Kong/H090-739-V33/2009_ | _EpiFluDB_       |
| 1768 2009-07-29_                   | _EPI_ISL_102898_ | _A/Hong_Kong/H090-750-V10/2009_ | _EpiFluDB_       |
| 1769 2009-07-29_                   | _EPI_ISL_102899_ | _A/Hong_Kong/H090-752-V10/2009_ | _EpiFluDB_       |
| 1770 2009-07-29_                   | _EPI_ISL_116729_ | _A/Hong_Kong/H090-739-V33/2009_ | _EpiFluDB_       |
| 1771 2009-07-29_                   | _EPI_ISL_116829_ | _A/Hong_Kong/H090-750-V10/2009_ | _EpiFluDB_       |
| 1772 2009-07-29_                   | _EPI_ISL_116830_ | _A/Hong_Kong/H090-752-V10/2009_ | _EpiFluDB_       |
| 1773 2009-07-30_                   | _EPI_ISL_87164_  | _A/Australia/55/2009_           | _EpiFluDB_       |
| 1774 2009-07-30_                   | _EPI_ISL_102872_ | _A/Hong_Kong/H090-747-V20/2009_ | _EpiFluDB_       |
| 1775 2009-07-30_                   | _EPI_ISL_102897_ | _A/Hong_Kong/H090-747-V22/2009_ | _EpiFluDB_       |
| 1776 2009-07-30_                   | _EPI_ISL_102913_ | _A/Hong_Kong/H090-756-V10/2009_ | _EpiFluDB_       |
| 1777 2009-07-30_                   | _EPI_ISL_116828_ | _A/Hong_Kong/H090-747-V22/2009_ | _EpiFluDB_       |
| 1778 2009-07-30_                   | _EPI_ISL_116832_ | _A/Hong_Kong/H090-756-V10/2009_ | _EpiFluDB_       |
| 1779 2009-07-31_                   | _EPI_ISL_102934_ | _A/Hong_Kong/H090-763-V10/2009_ | _EpiFluDB_       |
| 1780 2009-07-31_                   | _EPI_ISL_102936_ | _A/Hong_Kong/H090-764-V10/2009_ | _EpiFluDB_       |
| 1781 2009-07-31_                   | _EPI_ISL_116833_ | _A/Hong_Kong/H090-763-V10/2009_ | _EpiFluDB_       |
| 1782 2009-07-31_                   | _EPI_ISL_116897_ | _A/Hong_Kong/H090-764-V10/2009_ | _EpiFluDB_       |
| 1783 2009-08-01_                   | _EPI_ISL_102900_ | _A/Hong_Kong/H090-755-V20/2009_ | _EpiFluDB_       |
| 1784 2009-08-02_                   | _EPI_ISL_102953_ | _A/Hong_Kong/H090-768-V10/2009_ | _EpiFluDB_       |
| 1785 2009-08-03_                   | _EPI_ISL_102935_ | _A/Hong_Kong/H090-763-V23/2009_ | _EpiFluDB_       |
| 1786 2009-08-03_                   | _EPI_ISL_102954_ | _A/Hong_Kong/H090-769-V10/2009_ | _EpiFluDB_       |
| 1787 2009-08-03_                   | _EPI_ISL_116896_ | _A/Hong_Kong/H090-763-V23/2009_ | _EpiFluDB_       |
| 1788 2009-08-03_                   | _EPI_ISL_116898_ | _A/Hong_Kong/H090-769-V10/2009_ | _EpiFluDB_       |
| 1789 2009-08-03_                   | _EPI_ISL_116899_ | _A/Hong_Kong/H090-770-V10/2009_ | _EpiFluDB_       |
| 1790 2009-08-05_                   | _EPI_ISL_102912_ | _A/Hong_Kong/H090-755-V31/2009_ | _EpiFluDB_       |
| 1791 2009-08-05_                   | _EPI_ISL_116831_ | _A/Hong_Kong/H090-755-V31/2009_ | _EpiFluDB_       |
| 1792 2009-08-06_                   | _EPI_ISL_102980_ | _A/Hong_Kong/H090-781-V10/2009_ | _EpiFluDB_       |
| 1793 2009-08-07_                   | _EPI_ISL_102981_ | _A/Hong_Kong/H090-783-V10/2009_ | _EpiFluDB_       |
| 1794 2009-08-11_                   | _EPI_ISL_77627_  | _A/California/VRDL362/2009_     | _EpiFluDB_       |
| 1795 2009-09-02_                   | _EPI_ISL_149719_ | _A/Umea/4/2009/_                | _Aim_Erik_       |
| 1796 2009-09-05_                   | _EPI_ISL_142975_ | _A/Singapore/H2009.679/2009_    | _EpiFluDB_       |
| 1797 2009-09-05_                   | _EPI_ISL_143048_ | _A/Singapore/H2009.679/2009_    | _EpiFluDB_       |
| 1798 2009-09-18_                   | _EPI_ISL_66590_  | _A/Hong_Kong/26560/2009_        | _Garten_Rebecca_ |
| 1799 2009-09-19_                   | _EPI_ISL_76686_  | _A/India/2710/2009_             | _Garten_Rebecca_ |
| 1800 2009-10-14_                   | _EPI_ISL_87520_  | _A/Cambodia/NHRCC00001/2009_    | _EpiFluDB_       |
| 1801 2009-10-14_                   | _EPI_ISL_87521_  | _A/Cambodia/NHRCC00002/2009_    | _EpiFluDB_       |
| 1802 2009-10-14_                   | _EPI_ISL_87522_  | _A/Cambodia/NHRCC00006/2009_    | _EpiFluDB_       |
| 1803 2009-10-30_                   | _EPI_ISL_70621_  | _A/Thailand/CU-81672/2009_      | _EpiFluDB_       |
| 1804 2009-11-10_                   | _EPI_ISL_70622_  | _A/Thailand/CU-81697/2009_      | _EpiFluDB_       |
| 1805 2009-11-11_                   | _EPI_ISL_142944_ | _A/Singapore/C2009.863/2009_    | _EpiFluDB_       |
| 1806 2009-11-11_                   | _EPI_ISL_143017_ | _A/Singapore/C2009.863/2009_    | _EpiFluDB_       |
| 1807 2009-12-10_                   | _EPI_ISL_80870_  | _A/Thailand/CU-H1071/2009_      | _EpiFluDB_       |
| 1808 2010_(Month_and_day_unknown)_ | _EPI_ISL_125870_ | _A/Iowa/119/2010_               | _EpiFluDB_       |
| 1809 2010_(Month_and_day_unknown)_ | _EPI_ISL_127604_ | _A/Perth/10/2010_               | _EpiFluDB_       |
| 1810 2010_(Month_and_day_unknown)_ | _EPI_ISL_127628_ | _A/Brisbane/11/2010_            | _EpiFluDB_       |
| 1811 2010_(Month_and_day_unknown)_ | _EPI_ISL_127629_ | _A/Rhode_Island/01/2010_        | _EpiFluDB_       |

|      |             |                  |                                          |                  |
|------|-------------|------------------|------------------------------------------|------------------|
| 1812 | 2010-01-05_ | _EPI_ISL_83679_  | _A/Tianjin-Hexi/18/2010_                 | _Lan_Yu_         |
| 1813 | 2010-01-06_ | _EPI_ISL_83680_  | _A/Beijing-Zhaoyang/141/2010_            | _Lan_Yu_         |
| 1814 | 2010-01-10_ | _EPI_ISL_71045_  | _A/Nanjing/01/2010_                      | _EpiFluDB_       |
| 1815 | 2010-01-21_ | _EPI_ISL_80871_  | _A/Thailand/CU-H1285/2010_               | _EpiFluDB_       |
| 1816 | 2010-01-26_ | _EPI_ISL_93658_  | _A/Mexico_City/WRAIR1752T/2010_          | _EpiFluDB_       |
| 1817 | 2010-02-04_ | _EPI_ISL_80872_  | _A/Thailand/CU-H1443/2010_               | _EpiFluDB_       |
| 1818 | 2010-03-01_ | _EPI_ISL_83681_  | _A/Tianjin-Nankai/1842/2010_             | _Lan_Yu_         |
| 1819 | 2010-03-18_ | _EPI_ISL_142976_ | _A/Singapore/H2010.211/2010_             | _EpiFluDB_       |
| 1820 | 2010-03-18_ | _EPI_ISL_143049_ | _A/Singapore/H2010.211/2010_             | _EpiFluDB_       |
| 1821 | 2010-03-19_ | _EPI_ISL_80869_  | _A/Managua/305-10/2010_                  | _EpiFluDB_       |
| 1822 | 2010-03-24_ | _EPI_ISL_83682_  | _A/Tianjin-Nankai/1912/2010_             | _Lan_Yu_         |
| 1823 | 2010-04-09_ | _EPI_ISL_83683_  | _A/Heilongjiang-Longsha/160/2010_        | _Lan_Yu_         |
| 1824 | 2010-04-20_ | _EPI_ISL_142977_ | _A/Singapore/H2010.301/2010_             | _EpiFluDB_       |
| 1825 | 2010-04-20_ | _EPI_ISL_143050_ | _A/Singapore/H2010.301/2010_             | _EpiFluDB_       |
| 1826 | 2010-04-21_ | _EPI_ISL_115774_ | _A/Netherlands/009/2010_                 | _EpiFluDB_       |
| 1827 | 2010-05-12_ | _EPI_ISL_83684_  | _A/Tianjin-Hexi/1266/2010_               | _Lan_Yu_         |
| 1828 | 2010-05-17_ | _EPI_ISL_89576_  | _A/Managua/3345.02/2010_                 | _EpiFluDB_       |
| 1829 | 2010-05-20_ | _EPI_ISL_142980_ | _A/Singapore/H2010.384/2010_             | _EpiFluDB_       |
| 1830 | 2010-05-20_ | _EPI_ISL_143051_ | _A/Singapore/H2010.384/2010_             | _EpiFluDB_       |
| 1831 | 2010-05-21_ | _EPI_ISL_89577_  | _A/Managua/2654.01/2010_                 | _EpiFluDB_       |
| 1832 | 2010-05-22_ | _EPI_ISL_142981_ | _A/Singapore/H2010.389/2010_             | _EpiFluDB_       |
| 1833 | 2010-05-22_ | _EPI_ISL_143052_ | _A/Singapore/H2010.389/2010_             | _EpiFluDB_       |
| 1834 | 2010-05-25_ | _EPI_ISL_79464_  | _A/SRI_LANKA/7/2010_                     | _Komadina_Naomi_ |
| 1835 | 2010-05-26_ | _EPI_ISL_79674_  | _A/Brisbane/11/2010_                     | _Garten_Rebecca_ |
| 1836 | 2010-05-28_ | _EPI_ISL_89578_  | _A/Managua/5271.04/2010_                 | _EpiFluDB_       |
| 1837 | 2010-05-28_ | _EPI_ISL_89579_  | _A/Managua/3704.06/2010_                 | _EpiFluDB_       |
| 1838 | 2010-05-28_ | _EPI_ISL_89580_  | _A/Managua/5099.03/2010_                 | _EpiFluDB_       |
| 1839 | 2010-05-30_ | _EPI_ISL_89581_  | _A/Managua/4355.03/2010_                 | _EpiFluDB_       |
| 1840 | 2010-06-01_ | _EPI_ISL_89582_  | _A/Managua/1260.02/2010_                 | _EpiFluDB_       |
| 1841 | 2010-06-01_ | _EPI_ISL_89583_  | _A/Managua/1155.01/2010_                 | _EpiFluDB_       |
| 1842 | 2010-06-01_ | _EPI_ISL_89584_  | _A/Managua/3039.01/2010_                 | _EpiFluDB_       |
| 1843 | 2010-06-01_ | _EPI_ISL_89587_  | _A/Managua/5444.02/2010_                 | _EpiFluDB_       |
| 1844 | 2010-06-02_ | _EPI_ISL_80843_  | _A/Managua/905.02/2010_                  | _EpiFluDB_       |
| 1845 | 2010-06-02_ | _EPI_ISL_89574_  | _A/Managua/511.03/2010_                  | _EpiFluDB_       |
| 1846 | 2010-06-02_ | _EPI_ISL_89575_  | _A/Managua/5427.01/2010_                 | _EpiFluDB_       |
| 1847 | 2010-06-02_ | _EPI_ISL_89585_  | _A/Managua/2145.01/2010_                 | _EpiFluDB_       |
| 1848 | 2010-06-02_ | _EPI_ISL_89586_  | _A/Managua/5801.02/2010_                 | _EpiFluDB_       |
| 1849 | 2010-06-02_ | _EPI_ISL_89665_  | _A/Managua/4747.04/2010_                 | _EpiFluDB_       |
| 1850 | 2010-06-02_ | _EPI_ISL_89666_  | _A/Managua/38.01/2010_                   | _EpiFluDB_       |
| 1851 | 2010-06-03_ | _EPI_ISL_78770_  | _A/Managua/1181.03/2010_                 | _EpiFluDB_       |
| 1852 | 2010-06-03_ | _EPI_ISL_80837_  | _A/Managua/395.02/2010_                  | _EpiFluDB_       |
| 1853 | 2010-06-03_ | _EPI_ISL_80852_  | _A/Managua/1784.03/2010_                 | _EpiFluDB_       |
| 1854 | 2010-06-03_ | _EPI_ISL_89661_  | _A/Managua/5664.02/2010_                 | _EpiFluDB_       |
| 1855 | 2010-06-03_ | _EPI_ISL_89667_  | _A/Managua/3622.02/2010_                 | _EpiFluDB_       |
| 1856 | 2010-06-03_ | _EPI_ISL_89676_  | _A/Managua/4855.03/2010_                 | _EpiFluDB_       |
| 1857 | 2010-06-03_ | _EPI_ISL_95319_  | _A/Managua/3587.02/2010_                 | _EpiFluDB_       |
| 1858 | 2010-06-03_ | _EPI_ISL_95320_  | _A/Managua/5828.02/2010_                 | _EpiFluDB_       |
| 1859 | 2010-06-04_ | _EPI_ISL_80391_  | _A/Managua/1422.03/2010_                 | _EpiFluDB_       |
| 1860 | 2010-06-04_ | _EPI_ISL_80838_  | _A/Managua/5906.01/2010_                 | _EpiFluDB_       |
| 1861 | 2010-06-04_ | _EPI_ISL_80856_  | _A/Managua/3433.02/2010_                 | _EpiFluDB_       |
| 1862 | 2010-06-04_ | _EPI_ISL_80859_  | _A/Managua/5543.01/2010_                 | _EpiFluDB_       |
| 1863 | 2010-06-05_ | _EPI_ISL_80840_  | _A/Managua/3192.01/2010_                 | _EpiFluDB_       |
| 1864 | 2010-06-05_ | _EPI_ISL_80854_  | _A/Managua/5674.05/2010_                 | _EpiFluDB_       |
| 1865 | 2010-06-05_ | _EPI_ISL_80860_  | _A/Managua/506.02/2010_                  | _EpiFluDB_       |
| 1866 | 2010-06-05_ | _EPI_ISL_80862_  | _A/Managua/3527.02/2010_                 | _EpiFluDB_       |
| 1867 | 2010-06-05_ | _EPI_ISL_80863_  | _A/Managua/5863.02/2010_                 | _EpiFluDB_       |
| 1868 | 2010-06-06_ | _EPI_ISL_78773_  | _A/Managua/4131.04/2010_                 | _EpiFluDB_       |
| 1869 | 2010-06-06_ | _EPI_ISL_80839_  | _A/Managua/4763.03/2010_                 | _EpiFluDB_       |
| 1870 | 2010-06-06_ | _EPI_ISL_80849_  | _A/Managua/3244.02/2010_                 | _EpiFluDB_       |
| 1871 | 2010-06-06_ | _EPI_ISL_80858_  | _A/Managua/1166.03/2010_                 | _EpiFluDB_       |
| 1872 | 2010-06-06_ | _EPI_ISL_80864_  | _A/Managua/3570.04/2010_                 | _EpiFluDB_       |
| 1873 | 2010-06-06_ | _EPI_ISL_80868_  | _A/Managua/4456.02/2010_                 | _EpiFluDB_       |
| 1874 | 2010-06-06_ | _EPI_ISL_89668_  | _A/Managua/5898.02/2010_                 | _EpiFluDB_       |
| 1875 | 2010-06-07_ | _EPI_ISL_78771_  | _A/Managua/1807.03/2010_                 | _EpiFluDB_       |
| 1876 | 2010-06-07_ | _EPI_ISL_80846_  | _A/Managua/1167.03/2010_                 | _EpiFluDB_       |
| 1877 | 2010-06-07_ | _EPI_ISL_80847_  | _A/Managua/80.1/2010_                    | _EpiFluDB_       |
| 1878 | 2010-06-07_ | _EPI_ISL_80853_  | _A/Managua/3715.02/2010_                 | _EpiFluDB_       |
| 1879 | 2010-06-07_ | _EPI_ISL_80861_  | _A/Managua/4134.04/2010_                 | _EpiFluDB_       |
| 1880 | 2010-06-07_ | _EPI_ISL_80865_  | _A/Managua/4203.02/2010_                 | _EpiFluDB_       |
| 1881 | 2010-06-07_ | _EPI_ISL_80867_  | _A/Managua/2614.02/2010_                 | _EpiFluDB_       |
| 1882 | 2010-06-07_ | _EPI_ISL_89669_  | _A/Managua/3209.01/2010_                 | _EpiFluDB_       |
| 1883 | 2010-06-07_ | _EPI_ISL_89670_  | _A/Managua/3408.02/2010_                 | _EpiFluDB_       |
| 1884 | 2010-06-08_ | _EPI_ISL_78774_  | _A/Managua/5806.01/2010_                 | _EpiFluDB_       |
| 1885 | 2010-06-08_ | _EPI_ISL_79320_  | _A/Panama/307149/2010_                   | _Garten_Rebecca_ |
| 1886 | 2010-06-08_ | _EPI_ISL_80842_  | _A/Managua/5871.02/2010_                 | _EpiFluDB_       |
| 1887 | 2010-06-08_ | _EPI_ISL_80844_  | _A/Managua/194.01/2010_                  | _EpiFluDB_       |
| 1888 | 2010-06-08_ | _EPI_ISL_80850_  | _A/Managua/1535.03/2010_                 | _EpiFluDB_       |
| 1889 | 2010-06-08_ | _EPI_ISL_80855_  | _A/Managua/4218.02/2010_                 | _EpiFluDB_       |
| 1890 | 2010-06-08_ | _EPI_ISL_80857_  | _A/Managua/410.02/2010_                  | _EpiFluDB_       |
| 1891 | 2010-06-08_ | _EPI_ISL_80866_  | _A/Managua/5259.02/2010_                 | _EpiFluDB_       |
| 1892 | 2010-06-09_ | _EPI_ISL_80848_  | _A/Managua/1856.03/2010_                 | _EpiFluDB_       |
| 1893 | 2010-06-09_ | _EPI_ISL_89671_  | _A/Managua/3659.02/2010_                 | _EpiFluDB_       |
| 1894 | 2010-06-09_ | _EPI_ISL_95318_  | _A/Managua/1645.03/2010_                 | _EpiFluDB_       |
| 1895 | 2010-06-10_ | _EPI_ISL_78772_  | _A/Managua/2867.01/2010_                 | _EpiFluDB_       |
| 1896 | 2010-06-10_ | _EPI_ISL_89672_  | _A/Managua/1685.01/2010_                 | _EpiFluDB_       |
| 1897 | 2010-06-10_ | _EPI_ISL_89673_  | _A/Managua/4076.04/2010_                 | _EpiFluDB_       |
| 1898 | 2010-06-11_ | _EPI_ISL_89674_  | _A/Managua/4604.04/2010_                 | _EpiFluDB_       |
| 1899 | 2010-06-11_ | _EPI_ISL_89675_  | _A/Managua/5870.02/2010_                 | _EpiFluDB_       |
| 1900 | 2010-06-12_ | _EPI_ISL_80851_  | _A/Managua/90.01/2010_                   | _EpiFluDB_       |
| 1901 | 2010-06-13_ | _EPI_ISL_80845_  | _A/Managua/2912.04/2010_                 | _EpiFluDB_       |
| 1902 | 2010-06-14_ | _EPI_ISL_80841_  | _A/Managua/4009.02/2010_                 | _EpiFluDB_       |
| 1903 | 2010-06-16_ | _EPI_ISL_78726_  | _A/New_York/20342/2010_                  | _EpiFluDB_       |
| 1904 | 2010-06-16_ | _EPI_ISL_80060_  | _A/New_York/20343/2010_                  | _EpiFluDB_       |
| 1905 | 2010-06-21_ | _EPI_ISL_79466_  | _A/CAMBODIA/1/2010_                      | _Komadina_Naomi_ |
| 1906 | 2010-06-29_ | _EPI_ISL_93664_  | _A/Santo_Domingo/WRAIR3514T/2010_        | _EpiFluDB_       |
| 1907 | 2010-06-29_ | _EPI_ISL_93665_  | _A/Santo_Domingo/WRAIR3516N/2010_        | _EpiFluDB_       |
| 1908 | 2010-06-29_ | _EPI_ISL_93666_  | _A/Santo_Domingo/WRAIR3516T/2010_        | _EpiFluDB_       |
| 1909 | 2010-06-30_ | _EPI_ISL_91140_  | _A/Managua/3424.01/2010_                 | _EpiFluDB_       |
| 1910 | 2010-07-02_ | _EPI_ISL_91139_  | _A/Managua/2492.04/2010_                 | _EpiFluDB_       |
| 1911 | 2010-07-13_ | _EPI_ISL_79335_  | _A/Alabama/05/2010_                      | _Garten_Rebecca_ |
| 1912 | 2010-07-23_ | _EPI_ISL_142983_ | _A/Singapore/H2010.559C/2010_            | _EpiFluDB_       |
| 1913 | 2010-07-27_ | _EPI_ISL_84053_  | _A/Kenya/6063/2010_                      | _Garten_Rebecca_ |
| 1914 | 2010-07-27_ | _EPI_ISL_84054_  | _A/Kenya/6063/2010_                      | _Garten_Rebecca_ |
| 1915 | 2010-07-27_ | _EPI_ISL_84055_  | _A/Kenya/6063/2010_                      | _Garten_Rebecca_ |
| 1916 | 2010-08-11_ | _EPI_ISL_93667_  | _A/San_Salvador/WRAIR3537T/2010_         | _EpiFluDB_       |
| 1917 | 2010-08-14_ | _EPI_ISL_142985_ | _A/Singapore/H2010.619/2010_             | _EpiFluDB_       |
| 1918 | 2010-08-14_ | _EPI_ISL_143053_ | _A/Singapore/H2010.619/2010_             | _EpiFluDB_       |
| 1919 | 2010-08-17_ | _EPI_ISL_83688_  | _A/Anhui-Baohe/1456/2010_                | _Lan_Yu_         |
| 1920 | 2010-09-03_ | _EPI_ISL_84083_  | _A/Mexico/4553/2010_                     | _Garten_Rebecca_ |
| 1921 | 2010-09-03_ | _EPI_ISL_84084_  | _A/Mexico/4553/2010_                     | _Garten_Rebecca_ |
| 1922 | 2010-09-04_ | _EPI_ISL_90466_  | _A/Sydney/DD2-02/2010_                   | _EpiFluDB_       |
| 1923 | 2010-09-06_ | _EPI_ISL_83689_  | _A/Hubei-Qiaokou/1271/2010_              | _Lan_Yu_         |
| 1924 | 2010-09-10_ | _EPI_ISL_84850_  | _A/Nanjing/1655/2010_                    | _EpiFluDB_       |
| 1925 | 2010-09-10_ | _EPI_ISL_84851_  | _A/Nanjing/1654/2010_                    | _EpiFluDB_       |
| 1926 | 2010-09-10_ | _EPI_ISL_84852_  | _A/Nanjing/1663/2010_                    | _EpiFluDB_       |
| 1927 | 2010-09-10_ | _EPI_ISL_152508_ | _A/Peru/PER195/2010_                     | _EpiFluDB_       |
| 1928 | 2010-09-11_ | _EPI_ISL_93659_  | _A/District_of_Columbia/WRAIR1753P/2010_ | _EpiFluDB_       |
| 1929 | 2010-09-13_ | _EPI_ISL_90465_  | _A/Sydney/DD2-01/2010_                   | _EpiFluDB_       |
| 1930 | 2010-09-13_ | _EPI_ISL_152577_ | _A/Peru/PER210/2010_                     | _EpiFluDB_       |
| 1931 | 2010-09-15_ | _EPI_ISL_86080_  | _A/Taiwan/851/2010_                      | _Garten_Rebecca_ |
| 1932 | 2010-09-16_ | _EPI_ISL_152277_ | _A/Peru/PER083/2010_                     | _EpiFluDB_       |

|                  |                  |                              |            |
|------------------|------------------|------------------------------|------------|
| 1933 2010-09-17_ | _EPI_ISL_152247_ | _A/Peru/PER053/2010_         | _EpiFluDB_ |
| 1934 2010-09-17_ | _EPI_ISL_152742_ | _A/Peru/PER308/2010_         | _EpiFluDB_ |
| 1935 2010-09-19_ | _EPI_ISL_83690_  | _A/Shanghai-Luwan/1568/2010_ | _Lan_Yu_   |
| 1936 2010-09-20_ | _EPI_ISL_152683_ | _A/Peru/PER279/2010_         | _EpiFluDB_ |
| 1937 2010-09-21_ | _EPI_ISL_152350_ | _A/Peru/PER107/2010_         | _EpiFluDB_ |
| 1938 2010-09-23_ | _EPI_ISL_152761_ | _A/Peru/PER327/2010_         | _EpiFluDB_ |
| 1939 2010-09-24_ | _EPI_ISL_152156_ | _A/Peru/PER013/2010_         | _EpiFluDB_ |
| 1940 2010-09-27_ | _EPI_ISL_152464_ | _A/Peru/PER379/2010_         | _EpiFluDB_ |
| 1941 2010-09-29_ | _EPI_ISL_152458_ | _A/Peru/PER182/2010_         | _EpiFluDB_ |
| 1942 2010-09-30_ | _EPI_ISL_152193_ | _A/Peru/PER048/2010_         | _EpiFluDB_ |
| 1943 2010-09-30_ | _EPI_ISL_152438_ | _A/Peru/PER162/2010_         | _EpiFluDB_ |
| 1944 2010-09-30_ | _EPI_ISL_152844_ | _A/Peru/PER303/2010_         | _EpiFluDB_ |
| 1945 2010-09-30_ | _EPI_ISL_152755_ | _A/Peru/PER321/2010_         | _EpiFluDB_ |
| 1946 2010-10-04_ | _EPI_ISL_152347_ | _A/Peru/PER104/2010_         | _EpiFluDB_ |
| 1947 2010-10-04_ | _EPI_ISL_152375_ | _A/Peru/PER133/2010_         | _EpiFluDB_ |
| 1948 2010-10-06_ | _EPI_ISL_152169_ | _A/Peru/PER026/2010_         | _EpiFluDB_ |
| 1949 2010-10-06_ | _EPI_ISL_152195_ | _A/Peru/PER050/2010_         | _EpiFluDB_ |
| 1950 2010-10-07_ | _EPI_ISL_152841_ | _A/Peru/PER300/2010_         | _EpiFluDB_ |
| 1951 2010-10-10_ | _EPI_ISL_83691_  | _A/Hubei-Wuchang/1271/2010_  | _Lan_Yu_   |
| 1952 2010-10-11_ | _EPI_ISL_152181_ | _A/Peru/PER038/2010_         | _EpiFluDB_ |
| 1953 2010-10-11_ | _EPI_ISL_152381_ | _A/Peru/PER139/2010_         | _EpiFluDB_ |
| 1954 2010-10-11_ | _EPI_ISL_152445_ | _A/Peru/PER169/2010_         | _EpiFluDB_ |
| 1955 2010-10-11_ | _EPI_ISL_152487_ | _A/Peru/PER390/2010_         | _EpiFluDB_ |
| 1956 2010-10-11_ | _EPI_ISL_152495_ | _A/Peru/PER398/2010_         | _EpiFluDB_ |
| 1957 2010-10-12_ | _EPI_ISL_152616_ | _A/Peru/PER251/2010_         | _EpiFluDB_ |
| 1958 2010-10-13_ | _EPI_ISL_152252_ | _A/Peru/PER058/2010_         | _EpiFluDB_ |
| 1959 2010-10-13_ | _EPI_ISL_152282_ | _A/Peru/PER088/2010_         | _EpiFluDB_ |
| 1960 2010-10-13_ | _EPI_ISL_152465_ | _A/Peru/PER380/2010_         | _EpiFluDB_ |
| 1961 2010-10-13_ | _EPI_ISL_152501_ | _A/Peru/PER188/2010_         | _EpiFluDB_ |
| 1962 2010-10-13_ | _EPI_ISL_152600_ | _A/Peru/PER233/2010_         | _EpiFluDB_ |
| 1963 2010-10-13_ | _EPI_ISL_152810_ | _A/Peru/PER347/2010_         | _EpiFluDB_ |
| 1964 2010-10-14_ | _EPI_ISL_152284_ | _A/Peru/PER090/2010_         | _EpiFluDB_ |
| 1965 2010-10-14_ | _EPI_ISL_152460_ | _A/Peru/PER184/2010_         | _EpiFluDB_ |
| 1966 2010-10-14_ | _EPI_ISL_152663_ | _A/Peru/PER277/2010_         | _EpiFluDB_ |
| 1967 2010-10-14_ | _EPI_ISL_152832_ | _A/Peru/PER372/2010_         | _EpiFluDB_ |
| 1968 2010-10-15_ | _EPI_ISL_152287_ | _A/Peru/PER094/2010_         | _EpiFluDB_ |
| 1969 2010-10-15_ | _EPI_ISL_152585_ | _A/Peru/PER218/2010_         | _EpiFluDB_ |
| 1970 2010-10-15_ | _EPI_ISL_152611_ | _A/Peru/PER245/2010_         | _EpiFluDB_ |
| 1971 2010-10-15_ | _EPI_ISL_152646_ | _A/Peru/PER259/2010_         | _EpiFluDB_ |
| 1972 2010-10-16_ | _EPI_ISL_152265_ | _A/Peru/PER071/2010_         | _EpiFluDB_ |
| 1973 2010-10-16_ | _EPI_ISL_152344_ | _A/Peru/PER101/2010_         | _EpiFluDB_ |
| 1974 2010-10-16_ | _EPI_ISL_152658_ | _A/Peru/PER272/2010_         | _EpiFluDB_ |
| 1975 2010-10-18_ | _EPI_ISL_142987_ | _A/Singapore/H2010.797/2010_ | _EpiFluDB_ |
| 1976 2010-10-18_ | _EPI_ISL_143054_ | _A/Singapore/H2010.797/2010_ | _EpiFluDB_ |
| 1977 2010-10-18_ | _EPI_ISL_152183_ | _A/Peru/PER040/2010_         | _EpiFluDB_ |
| 1978 2010-10-18_ | _EPI_ISL_152270_ | _A/Peru/PER076/2010_         | _EpiFluDB_ |
| 1979 2010-10-18_ | _EPI_ISL_152387_ | _A/Peru/PER145/2010_         | _EpiFluDB_ |
| 1980 2010-10-18_ | _EPI_ISL_152509_ | _A/Peru/PER196/2010_         | _EpiFluDB_ |
| 1981 2010-10-18_ | _EPI_ISL_152580_ | _A/Peru/PER213/2010_         | _EpiFluDB_ |
| 1982 2010-10-18_ | _EPI_ISL_152660_ | _A/Peru/PER274/2010_         | _EpiFluDB_ |
| 1983 2010-10-18_ | _EPI_ISL_152752_ | _A/Peru/PER318/2010_         | _EpiFluDB_ |
| 1984 2010-10-19_ | _EPI_ISL_152447_ | _A/Peru/PER171/2010_         | _EpiFluDB_ |
| 1985 2010-10-19_ | _EPI_ISL_152757_ | _A/Peru/PER323/2010_         | _EpiFluDB_ |
| 1986 2010-10-19_ | _EPI_ISL_152763_ | _A/Peru/PER329/2010_         | _EpiFluDB_ |
| 1987 2010-10-20_ | _EPI_ISL_152178_ | _A/Peru/PER035/2010_         | _EpiFluDB_ |
| 1988 2010-10-20_ | _EPI_ISL_152614_ | _A/Peru/PER248/2010_         | _EpiFluDB_ |
| 1989 2010-10-20_ | _EPI_ISL_152644_ | _A/Peru/PER257/2010_         | _EpiFluDB_ |
| 1990 2010-10-20_ | _EPI_ISL_152696_ | _A/Peru/PER294/2010_         | _EpiFluDB_ |
| 1991 2010-10-20_ | _EPI_ISL_152776_ | _A/Peru/PER342/2010_         | _EpiFluDB_ |
| 1992 2010-10-21_ | _EPI_ISL_152269_ | _A/Peru/PER075/2010_         | _EpiFluDB_ |
| 1993 2010-10-21_ | _EPI_ISL_152385_ | _A/Peru/PER143/2010_         | _EpiFluDB_ |
| 1994 2010-10-21_ | _EPI_ISL_152466_ | _A/Peru/PER381/2010_         | _EpiFluDB_ |
| 1995 2010-10-21_ | _EPI_ISL_152617_ | _A/Peru/PER252/2010_         | _EpiFluDB_ |
| 1996 2010-10-21_ | _EPI_ISL_152749_ | _A/Peru/PER315/2010_         | _EpiFluDB_ |
| 1997 2010-10-21_ | _EPI_ISL_152822_ | _A/Peru/PER360/2010_         | _EpiFluDB_ |
| 1998 2010-10-22_ | _EPI_ISL_152151_ | _A/Peru/PER008/2010_         | _EpiFluDB_ |
| 1999 2010-10-22_ | _EPI_ISL_152167_ | _A/Peru/PER024/2010_         | _EpiFluDB_ |
| 2000 2010-10-22_ | _EPI_ISL_152172_ | _A/Peru/PER029/2010_         | _EpiFluDB_ |
| 2001 2010-10-22_ | _EPI_ISL_152274_ | _A/Peru/PER080/2010_         | _EpiFluDB_ |
| 2002 2010-10-22_ | _EPI_ISL_152359_ | _A/Peru/PER116/2010_         | _EpiFluDB_ |
| 2003 2010-10-22_ | _EPI_ISL_152370_ | _A/Peru/PER128/2010_         | _EpiFluDB_ |
| 2004 2010-10-22_ | _EPI_ISL_152377_ | _A/Peru/PER135/2010_         | _EpiFluDB_ |
| 2005 2010-10-22_ | _EPI_ISL_152578_ | _A/Peru/PER211/2010_         | _EpiFluDB_ |
| 2006 2010-10-22_ | _EPI_ISL_152606_ | _A/Peru/PER239/2010_         | _EpiFluDB_ |
| 2007 2010-10-22_ | _EPI_ISL_152694_ | _A/Peru/PER291/2010_         | _EpiFluDB_ |
| 2008 2010-10-22_ | _EPI_ISL_152746_ | _A/Peru/PER312/2010_         | _EpiFluDB_ |
| 2009 2010-10-22_ | _EPI_ISL_152813_ | _A/Peru/PER351/2010_         | _EpiFluDB_ |
| 2010 2010-10-23_ | _EPI_ISL_152253_ | _A/Peru/PER059/2010_         | _EpiFluDB_ |
| 2011 2010-10-23_ | _EPI_ISL_152278_ | _A/Peru/PER084/2010_         | _EpiFluDB_ |
| 2012 2010-10-23_ | _EPI_ISL_152505_ | _A/Peru/PER192/2010_         | _EpiFluDB_ |
| 2013 2010-10-25_ | _EPI_ISL_93660_  | _A/Belgrade/WRAIR2379N/2010_ | _EpiFluDB_ |
| 2014 2010-10-25_ | _EPI_ISL_152096_ | _A/Peru/PER001/2010_         | _EpiFluDB_ |
| 2015 2010-10-25_ | _EPI_ISL_152436_ | _A/Peru/PER160/2010_         | _EpiFluDB_ |
| 2016 2010-10-25_ | _EPI_ISL_152751_ | _A/Peru/PER317/2010_         | _EpiFluDB_ |
| 2017 2010-10-26_ | _EPI_ISL_93661_  | _A/Belgrade/WRAIR2956T/2010_ | _EpiFluDB_ |
| 2018 2010-10-26_ | _EPI_ISL_152152_ | _A/Peru/PER009/2010_         | _EpiFluDB_ |
| 2019 2010-10-26_ | _EPI_ISL_152258_ | _A/Peru/PER064/2010_         | _EpiFluDB_ |
| 2020 2010-10-26_ | _EPI_ISL_152283_ | _A/Peru/PER089/2010_         | _EpiFluDB_ |
| 2021 2010-10-26_ | _EPI_ISL_152368_ | _A/Peru/PER125/2010_         | _EpiFluDB_ |
| 2022 2010-10-26_ | _EPI_ISL_152467_ | _A/Peru/PER382/2010_         | _EpiFluDB_ |
| 2023 2010-10-26_ | _EPI_ISL_152597_ | _A/Peru/PER230/2010_         | _EpiFluDB_ |
| 2024 2010-10-26_ | _EPI_ISL_152698_ | _A/Peru/PER297/2010_         | _EpiFluDB_ |
| 2025 2010-10-26_ | _EPI_ISL_152819_ | _A/Peru/PER357/2010_         | _EpiFluDB_ |
| 2026 2010-10-27_ | _EPI_ISL_142988_ | _A/Singapore/H2010.822/2010_ | _EpiFluDB_ |
| 2027 2010-10-27_ | _EPI_ISL_143055_ | _A/Singapore/H2010.822/2010_ | _EpiFluDB_ |
| 2028 2010-10-27_ | _EPI_ISL_152268_ | _A/Peru/PER074/2010_         | _EpiFluDB_ |
| 2029 2010-10-27_ | _EPI_ISL_152273_ | _A/Peru/PER079/2010_         | _EpiFluDB_ |
| 2030 2010-10-27_ | _EPI_ISL_152390_ | _A/Peru/PER148/2010_         | _EpiFluDB_ |
| 2031 2010-10-27_ | _EPI_ISL_152457_ | _A/Peru/PER181/2010_         | _EpiFluDB_ |
| 2032 2010-10-27_ | _EPI_ISL_152574_ | _A/Peru/PER207/2010_         | _EpiFluDB_ |
| 2033 2010-10-27_ | _EPI_ISL_152575_ | _A/Peru/PER208/2010_         | _EpiFluDB_ |
| 2034 2010-10-27_ | _EPI_ISL_152592_ | _A/Peru/PER225/2010_         | _EpiFluDB_ |
| 2035 2010-10-27_ | _EPI_ISL_152691_ | _A/Peru/PER288/2010_         | _EpiFluDB_ |
| 2036 2010-10-27_ | _EPI_ISL_152753_ | _A/Peru/PER319/2010_         | _EpiFluDB_ |
| 2037 2010-10-27_ | _EPI_ISL_152811_ | _A/Peru/PER349/2010_         | _EpiFluDB_ |
| 2038 2010-10-28_ | _EPI_ISL_152164_ | _A/Peru/PER021/2010_         | _EpiFluDB_ |
| 2039 2010-10-28_ | _EPI_ISL_152175_ | _A/Peru/PER052/2010_         | _EpiFluDB_ |
| 2040 2010-10-28_ | _EPI_ISL_152371_ | _A/Peru/PER129/2010_         | _EpiFluDB_ |
| 2041 2010-10-28_ | _EPI_ISL_152462_ | _A/Peru/PER377/2010_         | _EpiFluDB_ |
| 2042 2010-10-28_ | _EPI_ISL_152471_ | _A/Peru/PER386/2010_         | _EpiFluDB_ |
| 2043 2010-10-28_ | _EPI_ISL_152490_ | _A/Peru/PER393/2010_         | _EpiFluDB_ |
| 2044 2010-10-28_ | _EPI_ISL_152652_ | _A/Peru/PER266/2010_         | _EpiFluDB_ |
| 2045 2010-10-28_ | _EPI_ISL_152689_ | _A/Peru/PER286/2010_         | _EpiFluDB_ |
| 2046 2010-10-28_ | _EPI_ISL_152772_ | _A/Peru/PER338/2010_         | _EpiFluDB_ |
| 2047 2010-10-29_ | _EPI_ISL_152254_ | _A/Peru/PER060/2010_         | _EpiFluDB_ |
| 2048 2010-10-29_ | _EPI_ISL_152489_ | _A/Peru/PER392/2010_         | _EpiFluDB_ |
| 2049 2010-10-30_ | _EPI_ISL_152146_ | _A/Peru/PER003/2010_         | _EpiFluDB_ |
| 2050 2010-10-30_ | _EPI_ISL_152148_ | _A/Peru/PER005/2010_         | _EpiFluDB_ |
| 2051 2010-10-30_ | _EPI_ISL_152276_ | _A/Peru/PER082/2010_         | _EpiFluDB_ |
| 2052 2010-11-02_ | _EPI_ISL_152153_ | _A/Peru/PER010/2010_         | _EpiFluDB_ |
| 2053 2010-11-02_ | _EPI_ISL_152579_ | _A/Peru/PER212/2010_         | _EpiFluDB_ |

|                  |                  |                                         |                  |
|------------------|------------------|-----------------------------------------|------------------|
| 2054 2010-11-02_ | _EPI_ISL_152587_ | _A/Peru/PER220/2010_                    | _EpiFluDB_       |
| 2055 2010-11-02_ | _EPI_ISL_152591_ | _A/Peru/PER224/2010_                    | _EpiFluDB_       |
| 2056 2010-11-02_ | _EPI_ISL_152595_ | _A/Peru/PER228/2010_                    | _EpiFluDB_       |
| 2057 2010-11-02_ | _EPI_ISL_152608_ | _A/Peru/PER242/2010_                    | _EpiFluDB_       |
| 2058 2010-11-02_ | _EPI_ISL_152759_ | _A/Peru/PER325/2010_                    | _EpiFluDB_       |
| 2059 2010-11-02_ | _EPI_ISL_152773_ | _A/Peru/PER339/2010_                    | _EpiFluDB_       |
| 2060 2010-11-03_ | _EPI_ISL_152190_ | _A/Peru/PER046/2010_                    | _EpiFluDB_       |
| 2061 2010-11-03_ | _EPI_ISL_152448_ | _A/Peru/PER172/2010_                    | _EpiFluDB_       |
| 2062 2010-11-03_ | _EPI_ISL_152774_ | _A/Peru/PER340/2010_                    | _EpiFluDB_       |
| 2063 2010-11-04_ | _EPI_ISL_152256_ | _A/Peru/PER062/2010_                    | _EpiFluDB_       |
| 2064 2010-11-04_ | _EPI_ISL_152259_ | _A/Peru/PER065/2010_                    | _EpiFluDB_       |
| 2065 2010-11-04_ | _EPI_ISL_152446_ | _A/Peru/PER170/2010_                    | _EpiFluDB_       |
| 2066 2010-11-04_ | _EPI_ISL_152456_ | _A/Peru/PER180/2010_                    | _EpiFluDB_       |
| 2067 2010-11-04_ | _EPI_ISL_152581_ | _A/Peru/PER214/2010_                    | _EpiFluDB_       |
| 2068 2010-11-04_ | _EPI_ISL_152615_ | _A/Peru/PER250/2010_                    | _EpiFluDB_       |
| 2069 2010-11-04_ | _EPI_ISL_152656_ | _A/Peru/PER270/2010_                    | _EpiFluDB_       |
| 2070 2010-11-04_ | _EPI_ISL_152662_ | _A/Peru/PER276/2010_                    | _EpiFluDB_       |
| 2071 2010-11-04_ | _EPI_ISL_152664_ | _A/Peru/PER278/2010_                    | _EpiFluDB_       |
| 2072 2010-11-04_ | _EPI_ISL_152764_ | _A/Peru/PER330/2010_                    | _EpiFluDB_       |
| 2073 2010-11-05_ | _EPI_ISL_152472_ | _A/Peru/PER387/2010_                    | _EpiFluDB_       |
| 2074 2010-11-05_ | _EPI_ISL_152779_ | _A/Peru/PER306/2010_                    | _EpiFluDB_       |
| 2075 2010-11-06_ | _EPI_ISL_152596_ | _A/Peru/PER229/2010_                    | _EpiFluDB_       |
| 2076 2010-11-06_ | _EPI_ISL_152607_ | _A/Peru/PER241/2010_                    | _EpiFluDB_       |
| 2077 2010-11-06_ | _EPI_ISL_152645_ | _A/Peru/PER258/2010_                    | _EpiFluDB_       |
| 2078 2010-11-06_ | _EPI_ISL_152827_ | _A/Peru/PER365/2010_                    | _EpiFluDB_       |
| 2079 2010-11-08_ | _EPI_ISL_152150_ | _A/Peru/PER007/2010_                    | _EpiFluDB_       |
| 2080 2010-11-08_ | _EPI_ISL_152355_ | _A/Peru/PER112/2010_                    | _EpiFluDB_       |
| 2081 2010-11-08_ | _EPI_ISL_152369_ | _A/Peru/PER127/2010_                    | _EpiFluDB_       |
| 2082 2010-11-08_ | _EPI_ISL_152569_ | _A/Peru/PER202/2010_                    | _EpiFluDB_       |
| 2083 2010-11-08_ | _EPI_ISL_152619_ | _A/Peru/PER254/2010_                    | _EpiFluDB_       |
| 2084 2010-11-08_ | _EPI_ISL_152653_ | _A/Peru/PER267/2010_                    | _EpiFluDB_       |
| 2085 2010-11-08_ | _EPI_ISL_152766_ | _A/Peru/PER332/2010_                    | _EpiFluDB_       |
| 2086 2010-11-08_ | _EPI_ISL_152812_ | _A/Peru/PER350/2010_                    | _EpiFluDB_       |
| 2087 2010-11-09_ | _EPI_ISL_152441_ | _A/Peru/PER165/2010_                    | _EpiFluDB_       |
| 2088 2010-11-09_ | _EPI_ISL_152649_ | _A/Peru/PER263/2010_                    | _EpiFluDB_       |
| 2089 2010-11-09_ | _EPI_ISL_152754_ | _A/Peru/PER320/2010_                    | _EpiFluDB_       |
| 2090 2010-11-10_ | _EPI_ISL_152352_ | _A/Peru/PER109/2010_                    | _EpiFluDB_       |
| 2091 2010-11-10_ | _EPI_ISL_152373_ | _A/Peru/PER131/2010_                    | _EpiFluDB_       |
| 2092 2010-11-10_ | _EPI_ISL_152380_ | _A/Peru/PER138/2010_                    | _EpiFluDB_       |
| 2093 2010-11-10_ | _EPI_ISL_152450_ | _A/Peru/PER174/2010_                    | _EpiFluDB_       |
| 2094 2010-11-11_ | _EPI_ISL_152383_ | _A/Peru/PER141/2010_                    | _EpiFluDB_       |
| 2095 2010-11-11_ | _EPI_ISL_152459_ | _A/Peru/PER183/2010_                    | _EpiFluDB_       |
| 2096 2010-11-11_ | _EPI_ISL_152769_ | _A/Peru/PER335/2010_                    | _EpiFluDB_       |
| 2097 2010-11-12_ | _EPI_ISL_152362_ | _A/Peru/PER119/2010_                    | _EpiFluDB_       |
| 2098 2010-11-12_ | _EPI_ISL_152440_ | _A/Peru/PER164/2010_                    | _EpiFluDB_       |
| 2099 2010-11-12_ | _EPI_ISL_152830_ | _A/Peru/PER370/2010_                    | _EpiFluDB_       |
| 2100 2010-11-13_ | _EPI_ISL_152154_ | _A/Peru/PER011/2010_                    | _EpiFluDB_       |
| 2101 2010-11-13_ | _EPI_ISL_152382_ | _A/Peru/PER140/2010_                    | _EpiFluDB_       |
| 2102 2010-11-13_ | _EPI_ISL_152433_ | _A/Peru/PER157/2010_                    | _EpiFluDB_       |
| 2103 2010-11-15_ | _EPI_ISL_152248_ | _A/Peru/PER054/2010_                    | _EpiFluDB_       |
| 2104 2010-11-15_ | _EPI_ISL_152504_ | _A/Peru/PER191/2010_                    | _EpiFluDB_       |
| 2105 2010-11-15_ | _EPI_ISL_152838_ | _A/Peru/PER201/2010_                    | _EpiFluDB_       |
| 2106 2010-11-15_ | _EPI_ISL_152836_ | _A/Peru/PER376/2010_                    | _EpiFluDB_       |
| 2107 2010-11-15_ | _EPI_ISL_152833_ | _A/Peru/PER373/2010_                    | _EpiFluDB_       |
| 2108 2010-11-16_ | _EPI_ISL_152176_ | _A/Peru/PER033/2010_                    | _EpiFluDB_       |
| 2109 2010-11-16_ | _EPI_ISL_152271_ | _A/Peru/PER077/2010_                    | _EpiFluDB_       |
| 2110 2010-11-16_ | _EPI_ISL_152286_ | _A/Peru/PER093/2010_                    | _EpiFluDB_       |
| 2111 2010-11-16_ | _EPI_ISL_152357_ | _A/Peru/PER114/2010_                    | _EpiFluDB_       |
| 2112 2010-11-16_ | _EPI_ISL_152618_ | _A/Peru/PER253/2010_                    | _EpiFluDB_       |
| 2113 2010-11-16_ | _EPI_ISL_152828_ | _A/Peru/PER367/2010_                    | _EpiFluDB_       |
| 2114 2010-11-17_ | _EPI_ISL_93639_  | _A/District_of_Columbia/WRAIR0300/2010_ | _EpiFluDB_       |
| 2115 2010-11-17_ | _EPI_ISL_152264_ | _A/Peru/PER070/2010_                    | _EpiFluDB_       |
| 2116 2010-11-17_ | _EPI_ISL_152267_ | _A/Peru/PER073/2010_                    | _EpiFluDB_       |
| 2117 2010-11-17_ | _EPI_ISL_152366_ | _A/Peru/PER123/2010_                    | _EpiFluDB_       |
| 2118 2010-11-17_ | _EPI_ISL_152388_ | _A/Peru/PER146/2010_                    | _EpiFluDB_       |
| 2119 2010-11-17_ | _EPI_ISL_152488_ | _A/Peru/PER391/2010_                    | _EpiFluDB_       |
| 2120 2010-11-17_ | _EPI_ISL_152745_ | _A/Peru/PER311/2010_                    | _EpiFluDB_       |
| 2121 2010-11-19_ | _EPI_ISL_152097_ | _A/Peru/PER002/2010_                    | _EpiFluDB_       |
| 2122 2010-11-19_ | _EPI_ISL_152346_ | _A/Peru/PER103/2010_                    | _EpiFluDB_       |
| 2123 2010-11-20_ | _EPI_ISL_152147_ | _A/Peru/PER004/2010_                    | _EpiFluDB_       |
| 2124 2010-11-20_ | _EPI_ISL_152168_ | _A/Peru/PER025/2010_                    | _EpiFluDB_       |
| 2125 2010-11-20_ | _EPI_ISL_152173_ | _A/Peru/PER030/2010_                    | _EpiFluDB_       |
| 2126 2010-11-20_ | _EPI_ISL_152695_ | _A/Peru/PER292/2010_                    | _EpiFluDB_       |
| 2127 2010-11-20_ | _EPI_ISL_152840_ | _A/Peru/PER299/2010_                    | _EpiFluDB_       |
| 2128 2010-11-20_ | _EPI_ISL_152823_ | _A/Peru/PER361/2010_                    | _EpiFluDB_       |
| 2129 2010-11-20_ | _EPI_ISL_152829_ | _A/Peru/PER369/2010_                    | _EpiFluDB_       |
| 2130 2010-11-22_ | _EPI_ISL_93674_  | _A/Mexico_City/WRAIR3571N/2010_         | _EpiFluDB_       |
| 2131 2010-11-22_ | _EPI_ISL_93675_  | _A/Mexico_City/WRAIR3577T/2010_         | _EpiFluDB_       |
| 2132 2010-11-22_ | _EPI_ISL_152665_ | _A/Peru/PER256/2010_                    | _EpiFluDB_       |
| 2133 2010-11-23_ | _EPI_ISL_93640_  | _A/District_of_Columbia/WRAIR0301/2010_ | _EpiFluDB_       |
| 2134 2010-11-23_ | _EPI_ISL_152162_ | _A/Peru/PER019/2010_                    | _EpiFluDB_       |
| 2135 2010-11-23_ | _EPI_ISL_152246_ | _A/Peru/PER052/2010_                    | _EpiFluDB_       |
| 2136 2010-11-23_ | _EPI_ISL_152288_ | _A/Peru/PER095/2010_                    | _EpiFluDB_       |
| 2137 2010-11-23_ | _EPI_ISL_152835_ | _A/Peru/PER375/2010_                    | _EpiFluDB_       |
| 2138 2010-11-24_ | _EPI_ISL_152165_ | _A/Peru/PER022/2010_                    | _EpiFluDB_       |
| 2139 2010-11-24_ | _EPI_ISL_152251_ | _A/Peru/PER057/2010_                    | _EpiFluDB_       |
| 2140 2010-11-26_ | _EPI_ISL_152158_ | _A/Peru/PER015/2010_                    | _EpiFluDB_       |
| 2141 2010-11-26_ | _EPI_ISL_152612_ | _A/Peru/PER246/2010_                    | _EpiFluDB_       |
| 2142 2010-11-27_ | _EPI_ISL_152454_ | _A/Peru/PER178/2010_                    | _EpiFluDB_       |
| 2143 2010-11-27_ | _EPI_ISL_152506_ | _A/Peru/PER193/2010_                    | _EpiFluDB_       |
| 2144 2010-11-29_ | _EPI_ISL_152363_ | _A/Peru/PER120/2010_                    | _EpiFluDB_       |
| 2145 2010-11-29_ | _EPI_ISL_152511_ | _A/Peru/PER198/2010_                    | _EpiFluDB_       |
| 2146 2010-11-29_ | _EPI_ISL_152845_ | _A/Peru/PER304/2010_                    | _EpiFluDB_       |
| 2147 2010-11-29_ | _EPI_ISL_152770_ | _A/Peru/PER336/2010_                    | _EpiFluDB_       |
| 2148 2010-11-30_ | _EPI_ISL_152688_ | _A/Peru/PER285/2010_                    | _EpiFluDB_       |
| 2149 2010-12-01_ | _EPI_ISL_93662_  | _A/Bogota/WRAIR3457N/2010_              | _EpiFluDB_       |
| 2150 2010-12-01_ | _EPI_ISL_93663_  | _A/Bogota/WRAIR3457T/2010_              | _EpiFluDB_       |
| 2151 2010-12-03_ | _EPI_ISL_152392_ | _A/Peru/PER150/2010_                    | _EpiFluDB_       |
| 2152 2010-12-03_ | _EPI_ISL_152444_ | _A/Peru/PER168/2010_                    | _EpiFluDB_       |
| 2153 2010-12-03_ | _EPI_ISL_152453_ | _A/Peru/PER177/2010_                    | _EpiFluDB_       |
| 2154 2010-12-03_ | _EPI_ISL_152601_ | _A/Peru/PER234/2010_                    | _EpiFluDB_       |
| 2155 2010-12-03_ | _EPI_ISL_152604_ | _A/Peru/PER237/2010_                    | _EpiFluDB_       |
| 2156 2010-12-03_ | _EPI_ISL_152744_ | _A/Peru/PER310/2010_                    | _EpiFluDB_       |
| 2157 2010-12-06_ | _EPI_ISL_152166_ | _A/Peru/PER023/2010_                    | _EpiFluDB_       |
| 2158 2010-12-06_ | _EPI_ISL_152468_ | _A/Peru/PER383/2010_                    | _EpiFluDB_       |
| 2159 2010-12-07_ | _EPI_ISL_152503_ | _A/Peru/PER190/2010_                    | _EpiFluDB_       |
| 2160 2010-12-08_ | _EPI_ISL_93676_  | _A/Mexico_City/WRAIR3578N/2010_         | _EpiFluDB_       |
| 2161 2010-12-08_ | _EPI_ISL_93677_  | _A/Mexico_City/WRAIR3578T/2010_         | _EpiFluDB_       |
| 2162 2010-12-08_ | _EPI_ISL_93680_  | _A/Mexico_City/WRAIR3580T/2010_         | _EpiFluDB_       |
| 2163 2010-12-08_ | _EPI_ISL_152389_ | _A/Peru/PER147/2010_                    | _EpiFluDB_       |
| 2164 2010-12-09_ | _EPI_ISL_93678_  | _A/Mexico_City/WRAIR3579N/2010_         | _EpiFluDB_       |
| 2165 2010-12-09_ | _EPI_ISL_93679_  | _A/Mexico_City/WRAIR3579T/2010_         | _EpiFluDB_       |
| 2166 2010-12-09_ | _EPI_ISL_152590_ | _A/Peru/PER223/2010_                    | _EpiFluDB_       |
| 2167 2010-12-13_ | _EPI_ISL_152155_ | _A/Peru/PER012/2010_                    | _EpiFluDB_       |
| 2168 2010-12-13_ | _EPI_ISL_152262_ | _A/Peru/PER068/2010_                    | _EpiFluDB_       |
| 2169 2010-12-14_ | _EPI_ISL_152353_ | _A/Peru/PER110/2010_                    | _EpiFluDB_       |
| 2170 2010-12-15_ | _EPI_ISL_152449_ | _A/Peru/PER173/2010_                    | _EpiFluDB_       |
| 2171 2010-12-16_ | _EPI_ISL_94907_  | _A/TOWNSVILLE/117/2010_                 | _Komadina_Naomi_ |
| 2172 2010-12-18_ | _EPI_ISL_152430_ | _A/Peru/PER154/2010_                    | _EpiFluDB_       |
| 2173 2010-12-20_ | _EPI_ISL_152571_ | _A/Peru/PER204/2010_                    | _EpiFluDB_       |
| 2174 2010-12-20_ | _EPI_ISL_152582_ | _A/Peru/PER215/2010_                    | _EpiFluDB_       |

|      |            |                  |                                       |                  |
|------|------------|------------------|---------------------------------------|------------------|
| 2175 | 2010-12-20 | _EPI_ISL_152697_ | _A/Peru/PER295/2010_                  | _EpiFluDB_       |
| 2176 | 2010-12-21 | _EPI_ISL_93668_  | _A/Mexico_City/WRAIR3568N/2010_       | _EpiFluDB_       |
| 2177 | 2010-12-21 | _EPI_ISL_93669_  | _A/Mexico_City/WRAIR3568N/2010_       | _EpiFluDB_       |
| 2178 | 2010-12-22 | _EPI_ISL_93671_  | _A/Mexico_City/WRAIR3569T/2010_       | _EpiFluDB_       |
| 2179 | 2010-12-22 | _EPI_ISL_93672_  | _A/Mexico_City/WRAIR3570T/2010_       | _EpiFluDB_       |
| 2180 | 2010-12-22 | _EPI_ISL_93673_  | _A/Mexico_City/WRAIR3570T/2010_       | _EpiFluDB_       |
| 2181 | 2010-12-22 | _EPI_ISL_95501_  | _A/Mexico_City/WRAIR3569N/2010(H3N2)_ | _EpiFluDB_       |
| 2182 | 2010-12-23 | _EPI_ISL_115775_ | _A/Netherlands/034/2010_              | _EpiFluDB_       |
| 2183 | 2010-12-29 | _EPI_ISL_93681_  | _A/Mexico_City/WRAIR4139N/2010_       | _EpiFluDB_       |
| 2184 | 2010-12-30 | _EPI_ISL_93788_  | _A/Iowa/19/2010_                      | _Garten_Rebecca_ |
| 2185 | 2010-12-30 | _EPI_ISL_96098_  | _A/Iowa/19/2010_                      | _Garten_Rebecca_ |
| 2186 | 2010-12-31 | _EPI_ISL_87906_  | _A/Massachusetts/06/2010_             | _Garten_Rebecca_ |
| 2187 | 2010-12-31 | _EPI_ISL_87885_  | _A/Texas/24/2010_                     | _Garten_Rebecca_ |
| 2188 | 2011-01-02 | _EPI_ISL_87961_  | _A/Ontario/RV0064/2011_               | _Garten_Rebecca_ |
| 2189 | 2011-01-03 | _EPI_ISL_108037_ | _A/Boston/DOA01/2011_                 | _EpiFluDB_       |
| 2190 | 2011-01-03 | _EPI_ISL_108070_ | _A/Boston/DOA03/2011_                 | _EpiFluDB_       |
| 2191 | 2011-01-04 | _EPI_ISL_108069_ | _A/Boston/DOA02/2011_                 | _EpiFluDB_       |
| 2192 | 2011-01-05 | _EPI_ISL_108071_ | _A/Boston/DOA04/2011_                 | _EpiFluDB_       |
| 2193 | 2011-01-05 | _EPI_ISL_115697_ | _A/Netherlands/063/2011_              | _EpiFluDB_       |
| 2194 | 2011-01-07 | _EPI_ISL_152249_ | _A/Peru/PER055/2011_                  | _EpiFluDB_       |
| 2195 | 2011-01-07 | _EPI_ISL_158622_ | _A/Tennessee/F2011/2011_              | _EpiFluDB_       |
| 2196 | 2011-01-11 | _EPI_ISL_87943_  | _A/New_Jersey/01/2011_                | _Garten_Rebecca_ |
| 2197 | 2011-01-11 | _EPI_ISL_108072_ | _A/Boston/DOA05/2011_                 | _EpiFluDB_       |
| 2198 | 2011-01-12 | _EPI_ISL_108088_ | _A/Boston/DOA06/2011_                 | _EpiFluDB_       |
| 2199 | 2011-01-13 | _EPI_ISL_108089_ | _A/Boston/DOA07/2011_                 | _EpiFluDB_       |
| 2200 | 2011-01-13 | _EPI_ISL_108090_ | _A/Boston/DOA09/2011_                 | _EpiFluDB_       |
| 2201 | 2011-01-13 | _EPI_ISL_108115_ | _A/Boston/DOA10/2011_                 | _EpiFluDB_       |
| 2202 | 2011-01-13 | _EPI_ISL_108116_ | _A/Boston/DOA11/2011_                 | _EpiFluDB_       |
| 2203 | 2011-01-13 | _EPI_ISL_152834_ | _A/Peru/PER374/2011_                  | _EpiFluDB_       |
| 2204 | 2011-01-15 | _EPI_ISL_94782_  | _A/VICTORIA/506/2011_                 | _Komadina_Naomi_ |
| 2205 | 2011-01-15 | _EPI_ISL_108117_ | _A/Boston/DOA12/2011_                 | _EpiFluDB_       |
| 2206 | 2011-01-16 | _EPI_ISL_91032_  | _A/California/NHRC0002/2011_          | _EpiFluDB_       |
| 2207 | 2011-01-16 | _EPI_ISL_93774_  | _A/California/16/2011_                | _Garten_Rebecca_ |
| 2208 | 2011-01-18 | _EPI_ISL_108093_ | _A/Boston/DOA15/2011_                 | _EpiFluDB_       |
| 2209 | 2011-01-19 | _EPI_ISL_90553_  | _A/Ilinois/NHRC0002/2011_             | _EpiFluDB_       |
| 2210 | 2011-01-19 | _EPI_ISL_108114_ | _A/Boston/DOA13/2011_                 | _EpiFluDB_       |
| 2211 | 2011-01-19 | _EPI_ISL_118540_ | _A/Boston/DOA16/2011_                 | _EpiFluDB_       |
| 2212 | 2011-01-20 | _EPI_ISL_152393_ | _A/Peru/PER151/2011_                  | _EpiFluDB_       |
| 2213 | 2011-01-21 | _EPI_ISL_95078_  | _A/NAURU/5/2011_                      | _Komadina_Naomi_ |
| 2214 | 2011-01-21 | _EPI_ISL_108091_ | _A/Boston/DOA17/2011_                 | _EpiFluDB_       |
| 2215 | 2011-01-21 | _EPI_ISL_158624_ | _A/Tennessee/F2018/2011_              | _EpiFluDB_       |
| 2216 | 2011-01-21 | _EPI_ISL_158626_ | _A/Tennessee/F2019/2011_              | _EpiFluDB_       |
| 2217 | 2011-01-22 | _EPI_ISL_89773_  | _A/Ilinois/03/2011_                   | _Garten_Rebecca_ |
| 2218 | 2011-01-22 | _EPI_ISL_90821_  | _A/Ilinois/04/2011_                   | _Garten_Rebecca_ |
| 2219 | 2011-01-24 | _EPI_ISL_158625_ | _A/Tennessee/F2018A/2011_             | _EpiFluDB_       |
| 2220 | 2011-01-24 | _EPI_ISL_158627_ | _A/Tennessee/F2019A/2011_             | _EpiFluDB_       |
| 2221 | 2011-01-25 | _EPI_ISL_90551_  | _A/Texas/NHRC0001/2011_               | _EpiFluDB_       |
| 2222 | 2011-01-25 | _EPI_ISL_91142_  | _A/Managua/58-11/2011_                | _EpiFluDB_       |
| 2223 | 2011-01-25 | _EPI_ISL_152502_ | _A/Peru/PER189/2011_                  | _EpiFluDB_       |
| 2224 | 2011-01-27 | _EPI_ISL_90848_  | _A/North_Carolina/05/2011_            | _Garten_Rebecca_ |
| 2225 | 2011-01-27 | _EPI_ISL_135248_ | _A/Boston/DOA29/2011_                 | _EpiFluDB_       |
| 2226 | 2011-01-28 | _EPI_ISL_90552_  | _A/South_Carolina/NHRC0001/2011_      | _EpiFluDB_       |
| 2227 | 2011-01-28 | _EPI_ISL_91033_  | _A/California/NHRC0003/2011_          | _EpiFluDB_       |
| 2228 | 2011-01-28 | _EPI_ISL_91034_  | _A/California/NHRC0004/2011_          | _EpiFluDB_       |
| 2229 | 2011-01-28 | _EPI_ISL_91141_  | _A/Managua/38-11/2011_                | _EpiFluDB_       |
| 2230 | 2011-01-28 | _EPI_ISL_90552_  | _A/South_Carolina/NHRC0001/2011_      | _EpiFluDB_       |
| 2231 | 2011-01-28 | _EPI_ISL_108141_ | _A/Boston/DOA20/2011_                 | _EpiFluDB_       |
| 2232 | 2011-01-28 | _EPI_ISL_158628_ | _A/Tennessee/F2021/2011_              | _EpiFluDB_       |
| 2233 | 2011-02-01 | _EPI_ISL_118557_ | _A/Boston/DOA24/2011_                 | _EpiFluDB_       |
| 2234 | 2011-02-04 | _EPI_ISL_158629_ | _A/Tennessee/F2021B/2011_             | _EpiFluDB_       |
| 2235 | 2011-02-05 | _EPI_ISL_89825_  | _A/Texas/06/2011_                     | _Garten_Rebecca_ |
| 2236 | 2011-02-07 | _EPI_ISL_93682_  | _A/Moscow/WRAIR4307N/2011_            | _EpiFluDB_       |
| 2237 | 2011-02-07 | _EPI_ISL_93683_  | _A/Moscow/WRAIR4307T/2011_            | _EpiFluDB_       |
| 2238 | 2011-02-07 | _EPI_ISL_108144_ | _A/Boston/DOA32/2011_                 | _EpiFluDB_       |
| 2239 | 2011-02-07 | _EPI_ISL_158633_ | _A/Tennessee/F2034/2011_              | _EpiFluDB_       |
| 2240 | 2011-02-07 | _EPI_ISL_158632_ | _A/Tennessee/F2031A/2011_             | _EpiFluDB_       |
| 2241 | 2011-02-08 | _EPI_ISL_94554_  | _A/Beijing-Xicheng/1293/2011_         | _Lan_Yu_         |
| 2242 | 2011-02-10 | _EPI_ISL_87952_  | _A/Georgia/01/2011_                   | _Garten_Rebecca_ |
| 2243 | 2011-02-10 | _EPI_ISL_135251_ | _A/Boston/DOA36/2011_                 | _EpiFluDB_       |
| 2244 | 2011-02-12 | _EPI_ISL_135252_ | _A/Boston/DOA38/2011_                 | _EpiFluDB_       |
| 2245 | 2011-02-13 | _EPI_ISL_135254_ | _A/Boston/DOA41/2011_                 | _EpiFluDB_       |
| 2246 | 2011-02-14 | _EPI_ISL_94610_  | _A/Shanghai-Luwan/188/2011_           | _Lan_Yu_         |
| 2247 | 2011-02-14 | _EPI_ISL_135258_ | _A/Boston/DOA47/2011_                 | _EpiFluDB_       |
| 2248 | 2011-02-15 | _EPI_ISL_94615_  | _A/Tianjin-Hedong/195/2011_           | _Lan_Yu_         |
| 2249 | 2011-02-15 | _EPI_ISL_135256_ | _A/Boston/DOA45/2011_                 | _EpiFluDB_       |
| 2250 | 2011-02-15 | _EPI_ISL_179533_ | _A/Bethesda/NIH12/2011_               | _EpiFluDB_       |
| 2251 | 2011-02-16 | _EPI_ISL_108176_ | _A/Boston/DOA48/2011_                 | _EpiFluDB_       |
| 2252 | 2011-02-16 | _EPI_ISL_158662_ | _A/Tennessee/F2048/2011_              | _EpiFluDB_       |
| 2253 | 2011-02-18 | _EPI_ISL_108177_ | _A/Boston/DOA51/2011_                 | _EpiFluDB_       |
| 2254 | 2011-02-18 | _EPI_ISL_108178_ | _A/Boston/DOA52/2011_                 | _EpiFluDB_       |
| 2255 | 2011-02-18 | _EPI_ISL_135260_ | _A/Boston/DOA50/2011_                 | _EpiFluDB_       |
| 2256 | 2011-02-18 | _EPI_ISL_158663_ | _A/Tennessee/F2048A/2011_             | _EpiFluDB_       |
| 2257 | 2011-02-20 | _EPI_ISL_94614_  | _A/Chongqing-Wanzhou/182/2011_        | _Lan_Yu_         |
| 2258 | 2011-02-21 | _EPI_ISL_108179_ | _A/Boston/DOA55/2011_                 | _EpiFluDB_       |
| 2259 | 2011-02-21 | _EPI_ISL_128109_ | _A/Boston/DOA27/2011_                 | _EpiFluDB_       |
| 2260 | 2011-02-22 | _EPI_ISL_94555_  | _A/Beijing-Xicheng/1409/2011_         | _Lan_Yu_         |
| 2261 | 2011-02-22 | _EPI_ISL_135262_ | _A/Boston/DOA54/2011_                 | _EpiFluDB_       |
| 2262 | 2011-02-22 | _EPI_ISL_158664_ | _A/Tennessee/F2053/2011_              | _EpiFluDB_       |
| 2263 | 2011-02-23 | _EPI_ISL_108180_ | _A/Boston/DOA57/2011_                 | _EpiFluDB_       |
| 2264 | 2011-02-23 | _EPI_ISL_152824_ | _A/Peru/PER362/2011_                  | _EpiFluDB_       |
| 2265 | 2011-02-24 | _EPI_ISL_108181_ | _A/Boston/DOA61/2011_                 | _EpiFluDB_       |
| 2266 | 2011-02-24 | _EPI_ISL_135263_ | _A/Boston/DOA60/2011_                 | _EpiFluDB_       |
| 2267 | 2011-02-25 | _EPI_ISL_135264_ | _A/Boston/DOA63/2011_                 | _EpiFluDB_       |
| 2268 | 2011-02-25 | _EPI_ISL_158665_ | _A/Tennessee/F2054A/2011_             | _EpiFluDB_       |
| 2269 | 2011-02-26 | _EPI_ISL_108182_ | _A/Boston/DOA66/2011_                 | _EpiFluDB_       |
| 2270 | 2011-02-26 | _EPI_ISL_108213_ | _A/Boston/DOA64/2011_                 | _EpiFluDB_       |
| 2271 | 2011-02-28 | _EPI_ISL_108194_ | _A/Boston/DOA67/2011_                 | _EpiFluDB_       |
| 2272 | 2011-03-01 | _EPI_ISL_90806_  | _A/Alaska/15/2011_                    | _Garten_Rebecca_ |
| 2273 | 2011-03-01 | _EPI_ISL_118558_ | _A/Boston/DOA68/2011_                 | _EpiFluDB_       |
| 2274 | 2011-03-02 | _EPI_ISL_108195_ | _A/Boston/DOA69/2011_                 | _EpiFluDB_       |
| 2275 | 2011-03-02 | _EPI_ISL_158668_ | _A/Tennessee/F2065/2011_              | _EpiFluDB_       |
| 2276 | 2011-03-03 | _EPI_ISL_94613_  | _A/Jilin-Chuanying/1156/2011_         | _Lan_Yu_         |
| 2277 | 2011-03-04 | _EPI_ISL_142945_ | _A/Singapore/C2011.173/2011_          | _EpiFluDB_       |
| 2278 | 2011-03-04 | _EPI_ISL_143020_ | _A/Singapore/C2011.173/2011_          | _EpiFluDB_       |
| 2279 | 2011-03-05 | _EPI_ISL_108212_ | _A/Boston/DOA71/2011_                 | _EpiFluDB_       |
| 2280 | 2011-03-07 | _EPI_ISL_158669_ | _A/Tennessee/F2065B/2011_             | _EpiFluDB_       |
| 2281 | 2011-03-07 | _EPI_ISL_158666_ | _A/Tennessee/F2057c54A/2011_          | _EpiFluDB_       |
| 2282 | 2011-03-08 | _EPI_ISL_94616_  | _A/Hellongjiang-Nangang/124/2011_     | _Lan_Yu_         |
| 2283 | 2011-03-09 | _EPI_ISL_94611_  | _A/Hellongjiang-Xiangyang/1125/2011_  | _Lan_Yu_         |
| 2284 | 2011-03-11 | _EPI_ISL_94640_  | _A/Hunan-Belhu/1143/2011_             | _Lan_Yu_         |
| 2285 | 2011-03-11 | _EPI_ISL_108261_ | _A/Boston/DOA75/2011_                 | _EpiFluDB_       |
| 2286 | 2011-03-12 | _EPI_ISL_108235_ | _A/Boston/DOA79/2011_                 | _EpiFluDB_       |
| 2287 | 2011-03-13 | _EPI_ISL_108215_ | _A/Boston/DOA77/2011_                 | _EpiFluDB_       |
| 2288 | 2011-03-14 | _EPI_ISL_108234_ | _A/Boston/DOA78/2011_                 | _EpiFluDB_       |
| 2289 | 2011-03-15 | _EPI_ISL_158671_ | _A/Tennessee/F2078/2011_              | _EpiFluDB_       |
| 2290 | 2011-03-15 | _EPI_ISL_158673_ | _A/Tennessee/F2079/2011_              | _EpiFluDB_       |
| 2291 | 2011-03-15 | _EPI_ISL_158676_ | _A/Tennessee/F2080c7879/2011_         | _EpiFluDB_       |
| 2292 | 2011-03-16 | _EPI_ISL_108236_ | _A/Boston/DOA80/2011_                 | _EpiFluDB_       |
| 2293 | 2011-03-16 | _EPI_ISL_158679_ | _A/Tennessee/F2084c83/2011_           | _EpiFluDB_       |
| 2294 | 2011-03-17 | _EPI_ISL_108237_ | _A/Boston/DOA81/2011_                 | _EpiFluDB_       |
| 2295 | 2011-03-17 | _EPI_ISL_108238_ | _A/Boston/DOA82/2011_                 | _EpiFluDB_       |

|                 |                  |                                   |                  |
|-----------------|------------------|-----------------------------------|------------------|
| 2296 2011-03-18 | _EPI_ISL_158672_ | _A/Tennessee/F2078A/2011_         | _EpiFluDB_       |
| 2297 2011-03-18 | _EPI_ISL_158674_ | _A/Tennessee/F2079A/2011_         | _EpiFluDB_       |
| 2298 2011-03-22 | _EPI_ISL_158675_ | _A/Tennessee/F2079B/2011_         | _EpiFluDB_       |
| 2299 2011-03-23 | _EPI_ISL_108258_ | _A/Boston/DOA85/2011_             | _EpiFluDB_       |
| 2300 2011-03-23 | _EPI_ISL_158680_ | _A/Tennessee/F2084c83A/2011_      | _EpiFluDB_       |
| 2301 2011-03-29 | _EPI_ISL_108259_ | _A/Boston/DOA86/2011_             | _EpiFluDB_       |
| 2302 2011-03-30 | _EPI_ISL_142946_ | _A/Singapore/C2011.244/2011_      | _EpiFluDB_       |
| 2303 2011-03-30 | _EPI_ISL_143021_ | _A/Singapore/C2011.244/2011_      | _EpiFluDB_       |
| 2304 2011-04-07 | _EPI_ISL_158683_ | _A/Tennessee/F2090B/2011_         | _EpiFluDB_       |
| 2305 2011-04-14 | _EPI_ISL_94641_  | _A/Hunan-Yanfeng/165/2011_        | _Lan_Yu_         |
| 2306 2011-04-15 | _EPI_ISL_93486_  | _A/Wisconsin/22/2011_             | _Garten_Rebecca_ |
| 2307 2011-04-15 | _EPI_ISL_94642_  | _A/Hellongjiang-Taoshan/147/2011_ | _Lan_Yu_         |
| 2308 2011-04-20 | _EPI_ISL_142947_ | _A/Singapore/C2011.301/2011_      | _EpiFluDB_       |
| 2309 2011-04-20 | _EPI_ISL_143022_ | _A/Singapore/C2011.301/2011_      | _EpiFluDB_       |
| 2310 2011-04-25 | _EPI_ISL_108260_ | _A/Boston/DOA87/2011_             | _EpiFluDB_       |
| 2311 2011-05-10 | _EPI_ISL_94644_  | _A/Shanghai-Fengxian/1170/2011_   | _Lan_Yu_         |
| 2312 2011-05-12 | _EPI_ISL_143023_ | _A/Singapore/C2011.362V/2011_     | _EpiFluDB_       |
| 2313 2011-05-16 | _EPI_ISL_99747_  | _A/SINGAPORE/41/2011_             | _Komadina_Naomi_ |
| 2314 2011-05-20 | _EPI_ISL_142948_ | _A/Singapore/C2011.384/2011_      | _EpiFluDB_       |
| 2315 2011-05-20 | _EPI_ISL_143024_ | _A/Singapore/C2011.384/2011_      | _EpiFluDB_       |
| 2316 2011-05-27 | _EPI_ISL_152602_ | _A/Peru/PER235/2011_              | _EpiFluDB_       |
| 2317 2011-05-30 | _EPI_ISL_142949_ | _A/Singapore/C2011.411/2011_      | _EpiFluDB_       |
| 2318 2011-05-30 | _EPI_ISL_143025_ | _A/Singapore/C2011.411/2011_      | _EpiFluDB_       |
| 2319 2011-05-30 | _EPI_ISL_152843_ | _A/Peru/PER302/2011_              | _EpiFluDB_       |
| 2320 2011-06-03 | _EPI_ISL_142950_ | _A/Singapore/C2011.422/2011_      | _EpiFluDB_       |
| 2321 2011-06-03 | _EPI_ISL_143026_ | _A/Singapore/C2011.422/2011_      | _EpiFluDB_       |
| 2322 2011-06-12 | _EPI_ISL_142990_ | _A/Singapore/H2011.447/2011_      | _EpiFluDB_       |
| 2323 2011-06-12 | _EPI_ISL_143056_ | _A/Singapore/H2011.447/2011_      | _EpiFluDB_       |
| 2324 2011-06-14 | _EPI_ISL_142951_ | _A/Singapore/C2011.452/2011_      | _EpiFluDB_       |
| 2325 2011-06-14 | _EPI_ISL_143027_ | _A/Singapore/C2011.452/2011_      | _EpiFluDB_       |
| 2326 2011-06-16 | _EPI_ISL_142952_ | _A/Singapore/C2011.458/2011_      | _EpiFluDB_       |
| 2327 2011-06-16 | _EPI_ISL_143028_ | _A/Singapore/C2011.458/2011_      | _EpiFluDB_       |
| 2328 2011-06-17 | _EPI_ISL_142991_ | _A/Singapore/H2011.460a/2011_     | _EpiFluDB_       |
| 2329 2011-06-17 | _EPI_ISL_143057_ | _A/Singapore/H2011.460a/2011_     | _EpiFluDB_       |
| 2330 2011-06-18 | _EPI_ISL_142993_ | _A/Singapore/H2011.463/2011_      | _EpiFluDB_       |
| 2331 2011-06-18 | _EPI_ISL_143058_ | _A/Singapore/H2011.463/2011_      | _EpiFluDB_       |
| 2332 2011-06-21 | _EPI_ISL_142953_ | _A/Singapore/C2011.471/2011_      | _EpiFluDB_       |
| 2333 2011-06-21 | _EPI_ISL_142994_ | _A/Singapore/H2011.471a/2011_     | _EpiFluDB_       |
| 2334 2011-06-21 | _EPI_ISL_142995_ | _A/Singapore/H2011.471b/2011_     | _EpiFluDB_       |
| 2335 2011-06-21 | _EPI_ISL_142996_ | _A/Singapore/H2011.471c/2011_     | _EpiFluDB_       |
| 2336 2011-06-21 | _EPI_ISL_143029_ | _A/Singapore/C2011.471/2011_      | _EpiFluDB_       |
| 2337 2011-06-21 | _EPI_ISL_143059_ | _A/Singapore/H2011.471a/2011_     | _EpiFluDB_       |
| 2338 2011-06-21 | _EPI_ISL_143060_ | _A/Singapore/H2011.471b/2011_     | _EpiFluDB_       |
| 2339 2011-06-21 | _EPI_ISL_143061_ | _A/Singapore/H2011.471c/2011_     | _EpiFluDB_       |
| 2340 2011-06-22 | _EPI_ISL_142997_ | _A/Singapore/H2011.474/2011_      | _EpiFluDB_       |
| 2341 2011-06-22 | _EPI_ISL_143062_ | _A/Singapore/H2011.474/2011_      | _EpiFluDB_       |
| 2342 2011-06-23 | _EPI_ISL_142954_ | _A/Singapore/C2011.477/2011_      | _EpiFluDB_       |
| 2343 2011-06-23 | _EPI_ISL_143030_ | _A/Singapore/C2011.477/2011_      | _EpiFluDB_       |
| 2344 2011-06-24 | _EPI_ISL_142998_ | _A/Singapore/H2011.479/2011_      | _EpiFluDB_       |
| 2345 2011-06-24 | _EPI_ISL_143063_ | _A/Singapore/H2011.479/2011_      | _EpiFluDB_       |
| 2346 2011-06-25 | _EPI_ISL_142999_ | _A/Singapore/H2011.482/2011_      | _EpiFluDB_       |
| 2347 2011-06-25 | _EPI_ISL_143064_ | _A/Singapore/H2011.482/2011_      | _EpiFluDB_       |
| 2348 2011-06-29 | _EPI_ISL_142955_ | _A/Singapore/C2011.493/2011_      | _EpiFluDB_       |
| 2349 2011-06-29 | _EPI_ISL_143031_ | _A/Singapore/C2011.493/2011_      | _EpiFluDB_       |
| 2350 2011-06-30 | _EPI_ISL_142956_ | _A/Singapore/C2011.496/2011_      | _EpiFluDB_       |
| 2351 2011-06-30 | _EPI_ISL_143000_ | _A/Singapore/H2011.496/2011_      | _EpiFluDB_       |
| 2352 2011-06-30 | _EPI_ISL_143032_ | _A/Singapore/C2011.496/2011_      | _EpiFluDB_       |
| 2353 2011-06-30 | _EPI_ISL_143065_ | _A/Singapore/H2011.496/2011_      | _EpiFluDB_       |
| 2354 2011-06-30 | _EPI_ISL_152762_ | _A/Peru/PER328/2011_              | _EpiFluDB_       |
| 2355 2011-07-01 | _EPI_ISL_143001_ | _A/Singapore/H2011.499a/2011_     | _EpiFluDB_       |
| 2356 2011-07-01 | _EPI_ISL_143066_ | _A/Singapore/H2011.499a/2011_     | _EpiFluDB_       |
| 2357 2011-07-04 | _EPI_ISL_143003_ | _A/Singapore/H2011.507/2011_      | _EpiFluDB_       |
| 2358 2011-07-04 | _EPI_ISL_143067_ | _A/Singapore/H2011.507/2011_      | _EpiFluDB_       |
| 2359 2011-07-06 | _EPI_ISL_142957_ | _A/Singapore/C2011.512/2011_      | _EpiFluDB_       |
| 2360 2011-07-06 | _EPI_ISL_143034_ | _A/Singapore/C2011.512/2011_      | _EpiFluDB_       |
| 2361 2011-07-07 | _EPI_ISL_143004_ | _A/Singapore/H2011.515/2011_      | _EpiFluDB_       |
| 2362 2011-07-07 | _EPI_ISL_143068_ | _A/Singapore/H2011.515/2011_      | _EpiFluDB_       |
| 2363 2011-07-08 | _EPI_ISL_142958_ | _A/Singapore/C2011.518/2011_      | _EpiFluDB_       |
| 2364 2011-07-08 | _EPI_ISL_143005_ | _A/Singapore/H2011.518/2011_      | _EpiFluDB_       |
| 2365 2011-07-08 | _EPI_ISL_143035_ | _A/Singapore/C2011.518/2011_      | _EpiFluDB_       |
| 2366 2011-07-08 | _EPI_ISL_143069_ | _A/Singapore/H2011.518/2011_      | _EpiFluDB_       |
| 2367 2011-07-18 | _EPI_ISL_205343_ | _A/Thailand/CU-R4929/2011_        | _EpiFluDB_       |
| 2368 2011-07-25 | _EPI_ISL_142960_ | _A/Singapore/C2011.564/2011_      | _EpiFluDB_       |
| 2369 2011-07-25 | _EPI_ISL_143036_ | _A/Singapore/C2011.564/2011_      | _EpiFluDB_       |
| 2370 2011-07-27 | _EPI_ISL_95264_  | _A/Indiana/08/2011_               | _Garten_Rebecca_ |
| 2371 2011-07-27 | _EPI_ISL_99419_  | _A/Indiana/08/2011_               | _Garten_Rebecca_ |
| 2372 2011-07-27 | _EPI_ISL_106847_ | _A/GOROKA/5/2011_                 | _Komadina_Naomi_ |
| 2373 2011-07-27 | _EPI_ISL_143006_ | _A/Singapore/H2011.570/2011_      | _EpiFluDB_       |
| 2374 2011-07-27 | _EPI_ISL_143070_ | _A/Singapore/H2011.570/2011_      | _EpiFluDB_       |
| 2375 2011-07-28 | _EPI_ISL_142961_ | _A/Singapore/C2011.573/2011_      | _EpiFluDB_       |
| 2376 2011-07-28 | _EPI_ISL_143037_ | _A/Singapore/C2011.573/2011_      | _EpiFluDB_       |
| 2377 2011-08-02 | _EPI_ISL_152379_ | _A/Peru/PER137/2011_              | _EpiFluDB_       |
| 2378 2011-08-03 | _EPI_ISL_205344_ | _A/Thailand/CU-R5105/2011_        | _EpiFluDB_       |
| 2379 2011-08-04 | _EPI_ISL_152157_ | _A/Peru/PER014/2011_              | _EpiFluDB_       |
| 2380 2011-08-12 | _EPI_ISL_142962_ | _A/Singapore/C2011.614/2011_      | _EpiFluDB_       |
| 2381 2011-08-12 | _EPI_ISL_143039_ | _A/Singapore/C2011.614/2011_      | _EpiFluDB_       |
| 2382 2011-08-12 | _EPI_ISL_152280_ | _A/Peru/PER086/2011_              | _EpiFluDB_       |
| 2383 2011-08-15 | _EPI_ISL_205353_ | _A/Thailand/CU-H3020/2011_        | _EpiFluDB_       |
| 2384 2011-08-17 | _EPI_ISL_152365_ | _A/Peru/PER122/2011_              | _EpiFluDB_       |
| 2385 2011-08-19 | _EPI_ISL_152659_ | _A/Peru/PER273/2011_              | _EpiFluDB_       |
| 2386 2011-08-20 | _EPI_ISL_152771_ | _A/Peru/PER337/2011_              | _EpiFluDB_       |
| 2387 2011-08-22 | _EPI_ISL_142963_ | _A/Singapore/C2011.641/2011_      | _EpiFluDB_       |
| 2388 2011-08-22 | _EPI_ISL_143040_ | _A/Singapore/C2011.641/2011_      | _EpiFluDB_       |
| 2389 2011-08-22 | _EPI_ISL_152605_ | _A/Peru/PER238/2011_              | _EpiFluDB_       |
| 2390 2011-08-23 | _EPI_ISL_152170_ | _A/Peru/PER027/2011_              | _EpiFluDB_       |
| 2391 2011-08-23 | _EPI_ISL_152250_ | _A/Peru/PER056/2011_              | _EpiFluDB_       |
| 2392 2011-08-23 | _EPI_ISL_152684_ | _A/Peru/PER281/2011_              | _EpiFluDB_       |
| 2393 2011-08-24 | _EPI_ISL_142964_ | _A/Singapore/C2011.647/2011_      | _EpiFluDB_       |
| 2394 2011-08-24 | _EPI_ISL_143041_ | _A/Singapore/C2011.647/2011_      | _EpiFluDB_       |
| 2395 2011-08-25 | _EPI_ISL_152149_ | _A/Peru/PER006/2011_              | _EpiFluDB_       |
| 2396 2011-08-25 | _EPI_ISL_152184_ | _A/Peru/PER041/2011_              | _EpiFluDB_       |
| 2397 2011-08-26 | _EPI_ISL_152187_ | _A/Peru/PER043/2011_              | _EpiFluDB_       |
| 2398 2011-08-26 | _EPI_ISL_152442_ | _A/Peru/PER166/2011_              | _EpiFluDB_       |
| 2399 2011-08-26 | _EPI_ISL_152610_ | _A/Peru/PER244/2011_              | _EpiFluDB_       |
| 2400 2011-08-26 | _EPI_ISL_152613_ | _A/Peru/PER247/2011_              | _EpiFluDB_       |
| 2401 2011-08-27 | _EPI_ISL_152171_ | _A/Peru/PER028/2011_              | _EpiFluDB_       |
| 2402 2011-08-29 | _EPI_ISL_152179_ | _A/Peru/PER036/2011_              | _EpiFluDB_       |
| 2403 2011-08-29 | _EPI_ISL_152512_ | _A/Peru/PER199/2011_              | _EpiFluDB_       |
| 2404 2011-08-29 | _EPI_ISL_152693_ | _A/Peru/PER290/2011_              | _EpiFluDB_       |
| 2405 2011-08-31 | _EPI_ISL_152594_ | _A/Peru/PER227/2011_              | _EpiFluDB_       |
| 2406 2011-08-31 | _EPI_ISL_152609_ | _A/Peru/PER243/2011_              | _EpiFluDB_       |
| 2407 2011-09-01 | _EPI_ISL_152507_ | _A/Peru/PER194/2011_              | _EpiFluDB_       |
| 2408 2011-09-02 | _EPI_ISL_152182_ | _A/Peru/PER039/2011_              | _EpiFluDB_       |
| 2409 2011-09-02 | _EPI_ISL_152255_ | _A/Peru/PER061/2011_              | _EpiFluDB_       |
| 2410 2011-09-02 | _EPI_ISL_152692_ | _A/Peru/PER289/2011_              | _EpiFluDB_       |
| 2411 2011-09-03 | _EPI_ISL_152188_ | _A/Peru/PER044/2011_              | _EpiFluDB_       |
| 2412 2011-09-03 | _EPI_ISL_152455_ | _A/Peru/PER179/2011_              | _EpiFluDB_       |
| 2413 2011-09-05 | _EPI_ISL_205345_ | _A/Thailand/CU-R5614/2011_        | _EpiFluDB_       |
| 2414 2011-09-06 | _EPI_ISL_106861_ | _A/BRISBANE/382/2011_             | _Komadina_Naomi_ |
| 2415 2011-09-06 | _EPI_ISL_152192_ | _A/Peru/PER047/2011_              | _EpiFluDB_       |
| 2416 2011-09-06 | _EPI_ISL_152349_ | _A/Peru/PER106/2011_              | _EpiFluDB_       |

|                                   |                  |                               |                  |
|-----------------------------------|------------------|-------------------------------|------------------|
| 2417 2011-09-06                   | _EPI_ISL_152434_ | _A/Peru/PER158/2011_          | _EpiFluDB_       |
| 2418 2011-09-06                   | _EPI_ISL_152452_ | _A/Peru/PER176/2011_          | _EpiFluDB_       |
| 2419 2011-09-06                   | _EPI_ISL_152643_ | _A/Peru/PER255/2011_          | _EpiFluDB_       |
| 2420 2011-09-06                   | _EPI_ISL_152817_ | _A/Peru/PER355/2011_          | _EpiFluDB_       |
| 2421 2011-09-07                   | _EPI_ISL_152374_ | _A/Peru/PER132/2011_          | _EpiFluDB_       |
| 2422 2011-09-07                   | _EPI_ISL_152391_ | _A/Peru/PER149/2011_          | _EpiFluDB_       |
| 2423 2011-09-07                   | _EPI_ISL_152491_ | _A/Peru/PER394/2011_          | _EpiFluDB_       |
| 2424 2011-09-07                   | _EPI_ISL_152493_ | _A/Peru/PER396/2011_          | _EpiFluDB_       |
| 2425 2011-09-07                   | _EPI_ISL_152573_ | _A/Peru/PER206/2011_          | _EpiFluDB_       |
| 2426 2011-09-07                   | _EPI_ISL_152839_ | _A/Peru/PER298/2011_          | _EpiFluDB_       |
| 2427 2011-09-08                   | _EPI_ISL_152439_ | _A/Peru/PER163/2011_          | _EpiFluDB_       |
| 2428 2011-09-09                   | _EPI_ISL_152372_ | _A/Peru/PER130/2011_          | _EpiFluDB_       |
| 2429 2011-09-09                   | _EPI_ISL_152690_ | _A/Peru/PER287/2011_          | _EpiFluDB_       |
| 2430 2011-09-10                   | _EPI_ISL_152160_ | _A/Peru/PER017/2011_          | _EpiFluDB_       |
| 2431 2011-09-10                   | _EPI_ISL_152494_ | _A/Peru/PER397/2011_          | _EpiFluDB_       |
| 2432 2011-09-10                   | _EPI_ISL_152756_ | _A/Peru/PER322/2011_          | _EpiFluDB_       |
| 2433 2011-09-12                   | _EPI_ISL_152572_ | _A/Peru/PER205/2011_          | _EpiFluDB_       |
| 2434 2011-09-12                   | _EPI_ISL_152598_ | _A/Peru/PER231/2011_          | _EpiFluDB_       |
| 2435 2011-09-12                   | _EPI_ISL_152654_ | _A/Peru/PER268/2011_          | _EpiFluDB_       |
| 2436 2011-09-13                   | _EPI_ISL_152263_ | _A/Peru/PER069/2011_          | _EpiFluDB_       |
| 2437 2011-09-13                   | _EPI_ISL_152281_ | _A/Peru/PER087/2011_          | _EpiFluDB_       |
| 2438 2011-09-13                   | _EPI_ISL_152290_ | _A/Peru/PER097/2011_          | _EpiFluDB_       |
| 2439 2011-09-13                   | _EPI_ISL_152428_ | _A/Peru/PER152/2011_          | _EpiFluDB_       |
| 2440 2011-09-13                   | _EPI_ISL_152657_ | _A/Peru/PER271/2011_          | _EpiFluDB_       |
| 2441 2011-09-14                   | _EPI_ISL_152470_ | _A/Peru/PER385/2011_          | _EpiFluDB_       |
| 2442 2011-09-14                   | _EPI_ISL_152486_ | _A/Peru/PER388/2011_          | _EpiFluDB_       |
| 2443 2011-09-14                   | _EPI_ISL_152570_ | _A/Peru/PER203/2011_          | _EpiFluDB_       |
| 2444 2011-09-14                   | _EPI_ISL_152651_ | _A/Peru/PER265/2011_          | _EpiFluDB_       |
| 2445 2011-09-15                   | _EPI_ISL_152291_ | _A/Peru/PER098/2011_          | _EpiFluDB_       |
| 2446 2011-09-15                   | _EPI_ISL_152655_ | _A/Peru/PER269/2011_          | _EpiFluDB_       |
| 2447 2011-09-16                   | _EPI_ISL_152463_ | _A/Peru/PER378/2011_          | _EpiFluDB_       |
| 2448 2011-09-16                   | _EPI_ISL_205346_ | _A/Thailand/CU-85697/2011_    | _EpiFluDB_       |
| 2449 2011-09-17                   | _EPI_ISL_106858_ | _A/PERTH/219/2011_            | _Komadina_Naomi_ |
| 2450 2011-09-19                   | _EPI_ISL_152650_ | _A/Peru/PER264/2011_          | _EpiFluDB_       |
| 2451 2011-09-20                   | _EPI_ISL_99771_  | _A/VICTORIA/103/2011_         | _Komadina_Naomi_ |
| 2452 2011-09-20                   | _EPI_ISL_101368_ | _A/Chiang_Rai/277/2011_       | _Garten_Rebecca_ |
| 2453 2011-09-20                   | _EPI_ISL_152194_ | _A/Peru/PER049/2011_          | _EpiFluDB_       |
| 2454 2011-09-20                   | _EPI_ISL_152814_ | _A/Peru/PER352/2011_          | _EpiFluDB_       |
| 2455 2011-09-21                   | _EPI_ISL_152661_ | _A/Peru/PER275/2011_          | _EpiFluDB_       |
| 2456 2011-09-22                   | _EPI_ISL_152809_ | _A/Peru/PER345/2011_          | _EpiFluDB_       |
| 2457 2011-09-22                   | _EPI_ISL_152826_ | _A/Peru/PER364/2011_          | _EpiFluDB_       |
| 2458 2011-09-28                   | _EPI_ISL_152358_ | _A/Peru/PER115/2011_          | _EpiFluDB_       |
| 2459 2011-09-30                   | _EPI_ISL_152685_ | _A/Peru/PER282/2011_          | _EpiFluDB_       |
| 2460 2011-09-30                   | _EPI_ISL_152767_ | _A/Peru/PER333/2011_          | _EpiFluDB_       |
| 2461 2011-10-01                   | _EPI_ISL_143008_ | _A/Singapore/H2011.751/2011_  | _EpiFluDB_       |
| 2462 2011-10-01                   | _EPI_ISL_143071_ | _A/Singapore/H2011.751/2011_  | _EpiFluDB_       |
| 2463 2011-10-04                   | _EPI_ISL_188998_ | _A/Nicaragua/AGA2-23/2011_    | _EpiFluDB_       |
| 2464 2011-10-05                   | _EPI_ISL_152461_ | _A/Peru/PER185/2011_          | _EpiFluDB_       |
| 2465 2011-10-06                   | _EPI_ISL_149718_ | _A/Stockholm/26/2011_         | _Alm_Erik_       |
| 2466 2011-10-06                   | _EPI_ISL_189001_ | _A/Nicaragua/AGA2-25/2011_    | _EpiFluDB_       |
| 2467 2011-10-07                   | _EPI_ISL_152384_ | _A/Peru/PER142/2011_          | _EpiFluDB_       |
| 2468 2011-10-07                   | _EPI_ISL_152593_ | _A/Peru/PER226/2011_          | _EpiFluDB_       |
| 2469 2011-10-07                   | _EPI_ISL_152686_ | _A/Peru/PER283/2011_          | _EpiFluDB_       |
| 2470 2011-10-10                   | _EPI_ISL_189019_ | _A/Nicaragua/AGA2-30/2011_    | _EpiFluDB_       |
| 2471 2011-10-12                   | _EPI_ISL_152177_ | _A/Peru/PER034/2011_          | _EpiFluDB_       |
| 2472 2011-10-12                   | _EPI_ISL_189020_ | _A/Nicaragua/AGA2-32/2011_    | _EpiFluDB_       |
| 2473 2011-10-17                   | _EPI_ISL_152159_ | _A/Peru/PER016/2011_          | _EpiFluDB_       |
| 2474 2011-10-17                   | _EPI_ISL_152741_ | _A/Peru/PER307/2011_          | _EpiFluDB_       |
| 2475 2011-10-17                   | _EPI_ISL_189026_ | _A/Nicaragua/AGA2-40/2011_    | _EpiFluDB_       |
| 2476 2011-10-17                   | _EPI_ISL_205347_ | _A/Thailand/CU-85848/2011_    | _EpiFluDB_       |
| 2477 2011-10-18                   | _EPI_ISL_143009_ | _A/Singapore/H2011.797/2011_  | _EpiFluDB_       |
| 2478 2011-10-18                   | _EPI_ISL_143072_ | _A/Singapore/H2011.797/2011_  | _EpiFluDB_       |
| 2479 2011-10-19                   | _EPI_ISL_152431_ | _A/Peru/PER155/2011_          | _EpiFluDB_       |
| 2480 2011-10-20                   | _EPI_ISL_106863_ | _A/BRISBANE/395/2011_         | _Komadina_Naomi_ |
| 2481 2011-10-20                   | _EPI_ISL_142966_ | _A/Singapore/C2011.803/2011_  | _EpiFluDB_       |
| 2482 2011-10-20                   | _EPI_ISL_143042_ | _A/Singapore/C2011.803/2011_  | _EpiFluDB_       |
| 2483 2011-10-20                   | _EPI_ISL_152758_ | _A/Peru/PER324/2011_          | _EpiFluDB_       |
| 2484 2011-10-21                   | _EPI_ISL_118653_ | _A/PHILIPPINES/3948/2011_     | _Komadina_Naomi_ |
| 2485 2011-10-21                   | _EPI_ISL_152364_ | _A/Peru/PER121/2011_          | _EpiFluDB_       |
| 2486 2011-10-22                   | _EPI_ISL_99417_  | _A/Indiana/10/2011_           | _Garten_Rebecca_ |
| 2487 2011-10-22                   | _EPI_ISL_99418_  | _A/Indiana/10/2011_           | _Garten_Rebecca_ |
| 2488 2011-10-22                   | _EPI_ISL_143010_ | _A/Singapore/H2011.808a/2011_ | _EpiFluDB_       |
| 2489 2011-10-22                   | _EPI_ISL_143073_ | _A/Singapore/H2011.808a/2011_ | _EpiFluDB_       |
| 2490 2011-10-23                   | _EPI_ISL_152163_ | _A/Peru/PER020/2011_          | _EpiFluDB_       |
| 2491 2011-10-23                   | _EPI_ISL_152687_ | _A/Peru/PER284/2011_          | _EpiFluDB_       |
| 2492 2011-10-24                   | _EPI_ISL_101506_ | _A/Victoria/361/2011_         | _Komadina_Naomi_ |
| 2493 2011-10-24                   | _EPI_ISL_104004_ | _A/Victoria/361/2011_         | _Garten_Rebecca_ |
| 2494 2011-10-24                   | _EPI_ISL_134450_ | _A/Victoria/361/2011_         | _Garten_Rebecca_ |
| 2495 2011-10-24                   | _EPI_ISL_152361_ | _A/Peru/PER118/2011_          | _EpiFluDB_       |
| 2496 2011-10-24                   | _EPI_ISL_152492_ | _A/Peru/PER395/2011_          | _EpiFluDB_       |
| 2497 2011-10-24                   | _EPI_ISL_189035_ | _A/Nicaragua/AGA2-49/2011_    | _EpiFluDB_       |
| 2498 2011-10-24                   | _EPI_ISL_189034_ | _A/Nicaragua/AGA2-48/2011_    | _EpiFluDB_       |
| 2499 2011-10-24                   | _EPI_ISL_205348_ | _A/Thailand/CU-85873/2011_    | _EpiFluDB_       |
| 2500 2011-10-25                   | _EPI_ISL_118600_ | _A/PHILIPPINES/3969/2011_     | _Komadina_Naomi_ |
| 2501 2011-10-25                   | _EPI_ISL_152775_ | _A/Peru/PER341/2011_          | _EpiFluDB_       |
| 2502 2011-10-26                   | _EPI_ISL_152279_ | _A/Peru/PER085/2011_          | _EpiFluDB_       |
| 2503 2011-10-26                   | _EPI_ISL_152768_ | _A/Peru/PER334/2011_          | _EpiFluDB_       |
| 2504 2011-10-28                   | _EPI_ISL_142967_ | _A/Singapore/C2011.825/2011_  | _EpiFluDB_       |
| 2505 2011-10-28                   | _EPI_ISL_143043_ | _A/Singapore/C2011.825/2011_  | _EpiFluDB_       |
| 2506 2011-10-31                   | _EPI_ISL_149714_ | _A/Stockholm/29/2011_         | _Alm_Erik_       |
| 2507 2011-10-31                   | _EPI_ISL_152261_ | _A/Peru/PER067/2011_          | _EpiFluDB_       |
| 2508 2011-10-31                   | _EPI_ISL_152378_ | _A/Peru/PER136/2011_          | _EpiFluDB_       |
| 2509 2011-11-03                   | _EPI_ISL_152777_ | _A/Peru/PER343/2011_          | _EpiFluDB_       |
| 2510 2011-11-03                   | _EPI_ISL_189083_ | _A/Nicaragua/AGA2-64/2011_    | _EpiFluDB_       |
| 2511 2011-11-03                   | _EPI_ISL_205349_ | _A/Thailand/CU-85909/2011_    | _EpiFluDB_       |
| 2512 2011-11-04                   | _EPI_ISL_100436_ | _A/Kentucky/05/2011_          | _Garten_Rebecca_ |
| 2513 2011-11-04                   | _EPI_ISL_103760_ | _A/Kentucky/05/2011_          | _Garten_Rebecca_ |
| 2514 2011-11-06                   | _EPI_ISL_100450_ | _A/Utah/12/2011_              | _Garten_Rebecca_ |
| 2515 2011-11-06                   | _EPI_ISL_189084_ | _A/Nicaragua/AGA2-65/2011_    | _EpiFluDB_       |
| 2516 2011-11-07                   | _EPI_ISL_152500_ | _A/Peru/PER187/2011_          | _EpiFluDB_       |
| 2517 2011-11-07                   | _EPI_ISL_189086_ | _A/Nicaragua/AGA2-67/2011_    | _EpiFluDB_       |
| 2518 2011-11-14                   | _EPI_ISL_99793_  | _A/Iowa/09/2011_              | _Garten_Rebecca_ |
| 2519 2011-11-14                   | _EPI_ISL_99794_  | _A/Iowa/07/2011_              | _Garten_Rebecca_ |
| 2520 2011-11-14                   | _EPI_ISL_99795_  | _A/Iowa/08/2011_              | _Garten_Rebecca_ |
| 2521 2011-11-14                   | _EPI_ISL_152510_ | _A/Peru/PER197/2011_          | _EpiFluDB_       |
| 2522 2011-11-15                   | _EPI_ISL_152260_ | _A/Peru/PER066/2011_          | _EpiFluDB_       |
| 2523 2011-11-15                   | _EPI_ISL_205350_ | _A/Thailand/CU-85928/2011_    | _EpiFluDB_       |
| 2524 2011-11-16                   | _EPI_ISL_152376_ | _A/Peru/PER134/2011_          | _EpiFluDB_       |
| 2525 2011-11-17                   | _EPI_ISL_118651_ | _A/CAMBODIA/74/2011_          | _Komadina_Naomi_ |
| 2526 2011-11-18                   | _EPI_ISL_121703_ | _A/SOUTH_AUSTRALIA/313/2011_  | _Komadina_Naomi_ |
| 2527 2011-11-19                   | _EPI_ISL_152837_ | _A/Peru/PER346/2011_          | _EpiFluDB_       |
| 2528 2011-11-23                   | _EPI_ISL_152285_ | _A/Peru/PER092/2011_          | _EpiFluDB_       |
| 2529 2011-12-07                   | _EPI_ISL_118588_ | _A/VICTORIA/893/2011_         | _Komadina_Naomi_ |
| 2530 2011-12-08                   | _EPI_ISL_205351_ | _A/Thailand/CU-C2417/2011_    | _EpiFluDB_       |
| 2531 2011-12-12                   | _EPI_ISL_118607_ | _A/PERTH/305/2011_            | _Komadina_Naomi_ |
| 2532 2011-12-26                   | _EPI_ISL_149712_ | _A/Stockholm/42/2011_         | _Alm_Erik_       |
| 2533 2011-12-28                   | _EPI_ISL_149716_ | _A/Stockholm/43/2011_         | _Alm_Erik_       |
| 2534 2012_(Month_and_day_unknown) | _EPI_ISL_127606_ | _A/reassortant/X-145_         | _EpiFluDB_       |
| 2535 2012-01-01                   | _EPI_ISL_152360_ | _A/Peru/PER117/2012_          | _EpiFluDB_       |
| 2536 2012-01-01                   | _EPI_ISL_152747_ | _A/Peru/PER313/2012_          | _EpiFluDB_       |
| 2537 2012-01-09                   | _EPI_ISL_205361_ | _A/Thailand/CU-H3141/2012_    | _EpiFluDB_       |

|                  |                  |                            |                  |
|------------------|------------------|----------------------------|------------------|
| 2538 2012-01-10_ | _EPI_ISL_148006_ | _A/Boston/DOA2-162/2012_   | _EpiFluDB_       |
| 2539 2012-01-12_ | _EPI_ISL_149715_ | _A/Stockholm/12/2012_      | _Alm_Erik_       |
| 2540 2012-01-21_ | _EPI_ISL_121691_ | _A/TOWNSVILLE/1/2012_      | _Komadina_Naomi_ |
| 2541 2012-01-25_ | _EPI_ISL_111406_ | _A/California/17/2012_     | _Garten_Rebecca_ |
| 2542 2012-01-30_ | _EPI_ISL_119717_ | _A/Rhode_Island/01/2012_   | _Garten_Rebecca_ |
| 2543 2012-01-30_ | _EPI_ISL_124531_ | _A/Rhode_Island/01/2012_   | _Garten_Rebecca_ |
| 2544 2012-01-30_ | _EPI_ISL_152292_ | _A/Peru/PER099/2012_       | _EpiFluDB_       |
| 2545 2012-02-01_ | _EPI_ISL_152386_ | _A/Peru/PER144/2012_       | _EpiFluDB_       |
| 2546 2012-02-03_ | _EPI_ISL_152275_ | _A/Peru/PER081/2012_       | _EpiFluDB_       |
| 2547 2012-02-04_ | _EPI_ISL_152818_ | _A/Peru/PER356/2012_       | _EpiFluDB_       |
| 2548 2012-02-08_ | _EPI_ISL_152584_ | _A/Peru/PER217/2012_       | _EpiFluDB_       |
| 2549 2012-02-08_ | _EPI_ISL_152820_ | _A/Peru/PER358/2012_       | _EpiFluDB_       |
| 2550 2012-02-16_ | _EPI_ISL_119712_ | _A/New_Mexico/07/2012_     | _Garten_Rebecca_ |
| 2551 2012-02-20_ | _EPI_ISL_119710_ | _A/California/22/2012_     | _Garten_Rebecca_ |
| 2552 2012-02-20_ | _EPI_ISL_121690_ | _A/TASMANIA/1/2012_        | _Komadina_Naomi_ |
| 2553 2012-02-23_ | _EPI_ISL_205354_ | _A/Thailand/CU-86091/2012_ | _EpiFluDB_       |
| 2554 2012-02-27_ | _EPI_ISL_152266_ | _A/Peru/PER072/2012_       | _EpiFluDB_       |
| 2555 2012-02-27_ | _EPI_ISL_152576_ | _A/Peru/PER209/2012_       | _EpiFluDB_       |
| 2556 2012-03-02_ | _EPI_ISL_111405_ | _A/Washington/16/2012_     | _Garten_Rebecca_ |
| 2557 2012-03-05_ | _EPI_ISL_122579_ | _A/GOROKA/5/2012_          | _Komadina_Naomi_ |
| 2558 2012-03-05_ | _EPI_ISL_152245_ | _A/Peru/PER051/2012_       | _EpiFluDB_       |
| 2559 2012-03-06_ | _EPI_ISL_119716_ | _A/Michigan/03/2012_       | _Garten_Rebecca_ |
| 2560 2012-03-07_ | _EPI_ISL_152161_ | _A/Peru/PER018/2012_       | _EpiFluDB_       |
| 2561 2012-03-07_ | _EPI_ISL_152497_ | _A/Peru/PER400/2012_       | _EpiFluDB_       |
| 2562 2012-03-08_ | _EPI_ISL_124532_ | _A/Ohio/02/2012_           | _Garten_Rebecca_ |
| 2563 2012-03-09_ | _EPI_ISL_152345_ | _A/Peru/PER102/2012_       | _EpiFluDB_       |
| 2564 2012-03-11_ | _EPI_ISL_149717_ | _A/Stockholm/14/2012_      | _Alm_Erik_       |
| 2565 2012-03-17_ | _EPI_ISL_152603_ | _A/Peru/PER236/2012_       | _EpiFluDB_       |
| 2566 2012-03-26_ | _EPI_ISL_128638_ | _A/NEW_CALEDONIA/1/2012_   | _Komadina_Naomi_ |
| 2567 2012-03-28_ | _EPI_ISL_152356_ | _A/Peru/PER113/2012_       | _EpiFluDB_       |
| 2568 2012-03-28_ | _EPI_ISL_152821_ | _A/Peru/PER359/2012_       | _EpiFluDB_       |
| 2569 2012-03-30_ | _EPI_ISL_119706_ | _A/Nevada/12/2012_         | _Garten_Rebecca_ |
| 2570 2012-04-02_ | _EPI_ISL_152498_ | _A/Peru/PER389/2012_       | _EpiFluDB_       |
| 2571 2012-04-02_ | _EPI_ISL_152842_ | _A/Peru/PER301/2012_       | _EpiFluDB_       |
| 2572 2012-04-03_ | _EPI_ISL_152496_ | _A/Peru/PER399/2012_       | _EpiFluDB_       |
| 2573 2012-04-04_ | _EPI_ISL_152272_ | _A/Peru/PER078/2012_       | _EpiFluDB_       |
| 2574 2012-04-04_ | _EPI_ISL_152348_ | _A/Peru/PER105/2012_       | _EpiFluDB_       |
| 2575 2012-04-08_ | _EPI_ISL_122559_ | _A/PERTH/41/2012_          | _Komadina_Naomi_ |
| 2576 2012-04-09_ | _EPI_ISL_152469_ | _A/Peru/PER384/2012_       | _EpiFluDB_       |
| 2577 2012-04-09_ | _EPI_ISL_152589_ | _A/Peru/PER222/2012_       | _EpiFluDB_       |
| 2578 2012-04-10_ | _EPI_ISL_152750_ | _A/Peru/PER316/2012_       | _EpiFluDB_       |
| 2579 2012-04-11_ | _EPI_ISL_152429_ | _A/Peru/PER153/2012_       | _EpiFluDB_       |
| 2580 2012-04-14_ | _EPI_ISL_149713_ | _A/Stockholm/19/2012_      | _Alm_Erik_       |
| 2581 2012-04-15_ | _EPI_ISL_129744_ | _A/Texas/50/2012_          | _Garten_Rebecca_ |
| 2582 2012-04-15_ | _EPI_ISL_129858_ | _A/Texas/50/2012_          | _Garten_Rebecca_ |
| 2583 2012-04-15_ | _EPI_ISL_164401_ | _A/Texas/50/2012_          | _Garten_Rebecca_ |
| 2584 2012-04-15_ | _EPI_ISL_170149_ | _A/Texas/50/2012_          | _Garten_Rebecca_ |
| 2585 2012-04-16_ | _EPI_ISL_152351_ | _A/Peru/PER108/2012_       | _EpiFluDB_       |
| 2586 2012-04-17_ | _EPI_ISL_152760_ | _A/Peru/PER326/2012_       | _EpiFluDB_       |
| 2587 2012-04-18_ | _EPI_ISL_152748_ | _A/Peru/PER314/2012_       | _EpiFluDB_       |
| 2588 2012-04-19_ | _EPI_ISL_129196_ | _A/Boston/DOA94/2012_      | _EpiFluDB_       |
| 2589 2012-04-19_ | _EPI_ISL_152648_ | _A/Peru/PER262/2012_       | _EpiFluDB_       |
| 2590 2012-04-21_ | _EPI_ISL_131830_ | _A/Pennsylvania/09/2012_   | _Cintron_Roxana_ |
| 2591 2012-04-21_ | _EPI_ISL_131831_ | _A/Pennsylvania/09/2012_   | _Cintron_Roxana_ |
| 2592 2012-04-30_ | _EPI_ISL_152289_ | _A/Peru/PER096/2012_       | _EpiFluDB_       |
| 2593 2012-04-30_ | _EPI_ISL_152815_ | _A/Peru/PER353/2012_       | _EpiFluDB_       |
| 2594 2012-05-02_ | _EPI_ISL_152185_ | _A/Peru/PER042/2012_       | _EpiFluDB_       |
| 2595 2012-05-02_ | _EPI_ISL_152257_ | _A/Peru/PER063/2012_       | _EpiFluDB_       |
| 2596 2012-05-02_ | _EPI_ISL_152588_ | _A/Peru/PER221/2012_       | _EpiFluDB_       |
| 2597 2012-05-04_ | _EPI_ISL_152443_ | _A/Peru/PER167/2012_       | _EpiFluDB_       |
| 2598 2012-05-07_ | _EPI_ISL_152586_ | _A/Peru/PER219/2012_       | _EpiFluDB_       |
| 2599 2012-05-07_ | _EPI_ISL_152740_ | _A/Peru/PER305/2012_       | _EpiFluDB_       |
| 2600 2012-05-07_ | _EPI_ISL_152825_ | _A/Peru/PER363/2012_       | _EpiFluDB_       |
| 2601 2012-05-09_ | _EPI_ISL_122600_ | _A/VICTORIA/802/2012_      | _Komadina_Naomi_ |
| 2602 2012-05-09_ | _EPI_ISL_152743_ | _A/Peru/PER309/2012_       | _EpiFluDB_       |
| 2603 2012-05-11_ | _EPI_ISL_152293_ | _A/Peru/PER100/2012_       | _EpiFluDB_       |
| 2604 2012-05-18_ | _EPI_ISL_152451_ | _A/Peru/PER175/2012_       | _EpiFluDB_       |
| 2605 2012-05-18_ | _EPI_ISL_152599_ | _A/Peru/PER232/2012_       | _EpiFluDB_       |
| 2606 2012-05-18_ | _EPI_ISL_152699_ | _A/Peru/PER280/2012_       | _EpiFluDB_       |
| 2607 2012-05-21_ | _EPI_ISL_152765_ | _A/Peru/PER331/2012_       | _EpiFluDB_       |
| 2608 2012-05-21_ | _EPI_ISL_152816_ | _A/Peru/PER354/2012_       | _EpiFluDB_       |
| 2609 2012-05-23_ | _EPI_ISL_152180_ | _A/Peru/PER037/2012_       | _EpiFluDB_       |
| 2610 2012-05-31_ | _EPI_ISL_152499_ | _A/Peru/PER186/2012_       | _EpiFluDB_       |
| 2611 2012-06-01_ | _EPI_ISL_152354_ | _A/Peru/PER111/2012_       | _EpiFluDB_       |
| 2612 2012-06-01_ | _EPI_ISL_152583_ | _A/Peru/PER216/2012_       | _EpiFluDB_       |
| 2613 2012-06-04_ | _EPI_ISL_152367_ | _A/Peru/PER124/2012_       | _EpiFluDB_       |
| 2614 2012-06-04_ | _EPI_ISL_152568_ | _A/Peru/PER200/2012_       | _EpiFluDB_       |
| 2615 2012-06-04_ | _EPI_ISL_152647_ | _A/Peru/PER260/2012_       | _EpiFluDB_       |
| 2616 2012-06-06_ | _EPI_ISL_152432_ | _A/Peru/PER156/2012_       | _EpiFluDB_       |
| 2617 2012-06-06_ | _EPI_ISL_205355_ | _A/Thailand/CU-86251/2012_ | _EpiFluDB_       |
| 2618 2012-06-22_ | _EPI_ISL_205356_ | _A/Thailand/CU-86274/2012_ | _EpiFluDB_       |
| 2619 2012-06-24_ | _EPI_ISL_128637_ | _A/TASMANIA/12/2012_       | _Komadina_Naomi_ |
| 2620 2012-06-26_ | _EPI_ISL_128641_ | _A/TASMANIA/26/2012_       | _Komadina_Naomi_ |
| 2621 2012-06-27_ | _EPI_ISL_129535_ | _A/Puerto_Rico/36/2012_    | _Garten_Rebecca_ |
| 2622 2012-06-30_ | _EPI_ISL_189102_ | _A/Nicaragua/AGA2-88/2012_ | _EpiFluDB_       |
| 2623 2012-07-02_ | _EPI_ISL_205357_ | _A/Thailand/CU-86309/2012_ | _EpiFluDB_       |
| 2624 2012-07-03_ | _EPI_ISL_128643_ | _A/CHRISTCHURCH/503/2012_  | _Komadina_Naomi_ |
| 2625 2012-07-05_ | _EPI_ISL_152831_ | _A/Peru/PER371/2012_       | _EpiFluDB_       |
| 2626 2012-07-07_ | _EPI_ISL_128644_ | _A/CHRISTCHURCH/516/2012_  | _Komadina_Naomi_ |
| 2627 2012-07-09_ | _EPI_ISL_129745_ | _A/Hawaii/22/2012_         | _Garten_Rebecca_ |
| 2628 2012-07-09_ | _EPI_ISL_129855_ | _A/Hawaii/22/2012_         | _Garten_Rebecca_ |
| 2629 2012-07-09_ | _EPI_ISL_189090_ | _A/Nicaragua/AGA2-72/2012_ | _EpiFluDB_       |
| 2630 2012-07-12_ | _EPI_ISL_129600_ | _A/Hawaii/03/2012_         | _Garten_Rebecca_ |
| 2631 2012-07-16_ | _EPI_ISL_122345_ | _A/Indiana/07/2012_        | _Garten_Rebecca_ |
| 2632 2012-07-16_ | _EPI_ISL_122346_ | _A/Indiana/09/2012_        | _Garten_Rebecca_ |
| 2633 2012-07-23_ | _EPI_ISL_173300_ | _A/Vietnam/13V_H3-3/2012_  | _Hiroki_Kondo_   |
| 2634 2012-07-25_ | _EPI_ISL_173308_ | _A/Vietnam/13V_H3-10/2012_ | _Hiroki_Kondo_   |
| 2635 2012-07-26_ | _EPI_ISL_189092_ | _A/Nicaragua/AGA2-76/2012_ | _EpiFluDB_       |
| 2636 2012-07-27_ | _EPI_ISL_129754_ | _A/Ohio/18/2012_           | _Garten_Rebecca_ |
| 2637 2012-07-27_ | _EPI_ISL_152174_ | _A/Peru/PER031/2012_       | _EpiFluDB_       |
| 2638 2012-07-27_ | _EPI_ISL_173307_ | _A/Vietnam/13V_H3-9/2012_  | _Hiroki_Kondo_   |
| 2639 2012-07-28_ | _EPI_ISL_126253_ | _A/Ohio/16/2012_           | _Garten_Rebecca_ |
| 2640 2012-07-28_ | _EPI_ISL_128142_ | _A/Ohio/17/2012_           | _Garten_Rebecca_ |
| 2641 2012-07-29_ | _EPI_ISL_126246_ | _A/Ohio/14/2012_           | _Garten_Rebecca_ |
| 2642 2012-07-29_ | _EPI_ISL_126254_ | _A/Indiana/15/2012_        | _Garten_Rebecca_ |
| 2643 2012-07-29_ | _EPI_ISL_128309_ | _A/Indiana/18/2012_        | _Garten_Rebecca_ |
| 2644 2012-07-29_ | _EPI_ISL_126255_ | _A/Indiana/20/2012_        | _Garten_Rebecca_ |
| 2645 2012-07-29_ | _EPI_ISL_129755_ | _A/Ohio/19/2012_           | _Garten_Rebecca_ |
| 2646 2012-07-30_ | _EPI_ISL_128392_ | _A/Ohio/23/2012_           | _Garten_Rebecca_ |
| 2647 2012-07-30_ | _EPI_ISL_162298_ | _A/Thailand/VIROAF2/2012_  | _EpiFluDB_       |
| 2648 2012-07-31_ | _EPI_ISL_126256_ | _A/Indiana/21/2012_        | _Garten_Rebecca_ |
| 2649 2012-08-01_ | _EPI_ISL_128389_ | _A/Ohio/28/2012_           | _Garten_Rebecca_ |
| 2650 2012-08-02_ | _EPI_ISL_128152_ | _A/Indiana/59/2012_        | _Garten_Rebecca_ |
| 2651 2012-08-02_ | _EPI_ISL_128352_ | _A/Indiana/65/2012_        | _Garten_Rebecca_ |
| 2652 2012-08-02_ | _EPI_ISL_129410_ | _A/Indiana/77/2012_        | _Garten_Rebecca_ |
| 2653 2012-08-02_ | _EPI_ISL_129417_ | _A/Indiana/57/2012_        | _Garten_Rebecca_ |
| 2654 2012-08-02_ | _EPI_ISL_129646_ | _A/Indiana/90/2012_        | _Garten_Rebecca_ |
| 2655 2012-08-02_ | _EPI_ISL_129647_ | _A/Ohio/36/2012_           | _Garten_Rebecca_ |
| 2656 2012-08-03_ | _EPI_ISL_129019_ | _A/Indiana/132/2012_       | _Garten_Rebecca_ |
| 2657 2012-08-03_ | _EPI_ISL_129419_ | _A/Ohio/34/2012_           | _Garten_Rebecca_ |
| 2658 2012-08-03_ | _EPI_ISL_129421_ | _A/Indiana/125/2012_       | _Garten_Rebecca_ |

|                 |                  |                                 |                  |
|-----------------|------------------|---------------------------------|------------------|
| 2659 2012-08-03 | _EPI_ISL_129424_ | _A/Indiana/133/2012_            | _Garten_Rebecca_ |
| 2660 2012-08-03 | _EPI_ISL_129619_ | _A/Indiana/99/2012_             | _Garten_Rebecca_ |
| 2661 2012-08-03 | _EPI_ISL_129645_ | _A/Indiana/104/2012_            | _Garten_Rebecca_ |
| 2662 2012-08-04 | _EPI_ISL_128311_ | _A/Ohio/38/2012_                | _Garten_Rebecca_ |
| 2663 2012-08-04 | _EPI_ISL_129171_ | _A/Ohio/35/2012_                | _Garten_Rebecca_ |
| 2664 2012-08-04 | _EPI_ISL_129422_ | _A/Indiana/126/2012_            | _Garten_Rebecca_ |
| 2665 2012-08-04 | _EPI_ISL_129423_ | _A/Indiana/127/2012_            | _Garten_Rebecca_ |
| 2666 2012-08-04 | _EPI_ISL_129552_ | _A/Indiana/115/2012_            | _Garten_Rebecca_ |
| 2667 2012-08-04 | _EPI_ISL_129615_ | _A/Indiana/123/2012_            | _Garten_Rebecca_ |
| 2668 2012-08-05 | _EPI_ISL_128351_ | _A/Ohio/52/2012_                | _Garten_Rebecca_ |
| 2669 2012-08-05 | _EPI_ISL_129414_ | _A/Indiana/149/2012_            | _Garten_Rebecca_ |
| 2670 2012-08-05 | _EPI_ISL_129415_ | _A/Indiana/113/2012_            | _Garten_Rebecca_ |
| 2671 2012-08-05 | _EPI_ISL_129420_ | _A/Indiana/103/2012_            | _Garten_Rebecca_ |
| 2672 2012-08-05 | _EPI_ISL_129610_ | _A/Ohio/37/2012_                | _Garten_Rebecca_ |
| 2673 2012-08-05 | _EPI_ISL_129428_ | _A/Ohio/57/2012_                | _Garten_Rebecca_ |
| 2674 2012-08-06 | _EPI_ISL_128310_ | _A/West_Virginia/09/2012_       | _Garten_Rebecca_ |
| 2675 2012-08-06 | _EPI_ISL_128391_ | _A/West_Virginia/10/2012_       | _Garten_Rebecca_ |
| 2676 2012-08-06 | _EPI_ISL_129616_ | _A/Indiana/138/2012_            | _Garten_Rebecca_ |
| 2677 2012-08-06 | _EPI_ISL_129618_ | _A/Indiana/93/2012_             | _Garten_Rebecca_ |
| 2678 2012-08-06 | _EPI_ISL_129427_ | _A/Ohio/43/2012_                | _Garten_Rebecca_ |
| 2679 2012-08-07 | _EPI_ISL_129649_ | _A/Ohio/47/2012_                | _Garten_Rebecca_ |
| 2680 2012-08-08 | _EPI_ISL_129425_ | _A/Indiana/135/2012_            | _Garten_Rebecca_ |
| 2681 2012-08-08 | _EPI_ISL_129426_ | _A/Indiana/144/2012_            | _Garten_Rebecca_ |
| 2682 2012-08-08 | _EPI_ISL_129648_ | _A/Ohio/44/2012_                | _Garten_Rebecca_ |
| 2683 2012-08-08 | _EPI_ISL_129416_ | _A/Indiana/150/2012_            | _Garten_Rebecca_ |
| 2684 2012-08-09 | _EPI_ISL_128393_ | _A/West_Virginia/16/2012_       | _Garten_Rebecca_ |
| 2685 2012-08-09 | _EPI_ISL_129418_ | _A/Indiana/147/2012_            | _Garten_Rebecca_ |
| 2686 2012-08-09 | _EPI_ISL_129412_ | _A/Ohio/78/2012_                | _Garten_Rebecca_ |
| 2687 2012-08-09 | _EPI_ISL_129413_ | _A/Ohio/79/2012_                | _Garten_Rebecca_ |
| 2688 2012-08-10 | _EPI_ISL_128394_ | _A/Ohio/64/2012_                | _Garten_Rebecca_ |
| 2689 2012-08-10 | _EPI_ISL_129650_ | _A/Ohio/56/2012_                | _Garten_Rebecca_ |
| 2690 2012-08-10 | _EPI_ISL_129429_ | _A/Ohio/63/2012_                | _Garten_Rebecca_ |
| 2691 2012-08-10 | _EPI_ISL_189097_ | _A/Nicaragua/AGA2-81/2012_      | _EpiFluDB_       |
| 2692 2012-08-11 | _EPI_ISL_129172_ | _A/Ohio/65/2012_                | _Garten_Rebecca_ |
| 2693 2012-08-12 | _EPI_ISL_129708_ | _A/Ohio/87/2012_                | _Garten_Rebecca_ |
| 2694 2012-08-13 | _EPI_ISL_128390_ | _A/Ohio/71/2012_                | _Garten_Rebecca_ |
| 2695 2012-08-13 | _EPI_ISL_128388_ | _A/Ohio/62/2012_                | _Garten_Rebecca_ |
| 2696 2012-08-13 | _EPI_ISL_129020_ | _A/Ohio/69/2012_                | _Garten_Rebecca_ |
| 2697 2012-08-13 | _EPI_ISL_129652_ | _A/Ohio/84/2012_                | _Garten_Rebecca_ |
| 2698 2012-08-15 | _EPI_ISL_129022_ | _A/Wisconsin/23/2012_           | _Garten_Rebecca_ |
| 2699 2012-08-15 | _EPI_ISL_129411_ | _A/Ohio/77/2012_                | _Garten_Rebecca_ |
| 2700 2012-08-15 | _EPI_ISL_129620_ | _A/Michigan/16/2012_            | _Garten_Rebecca_ |
| 2701 2012-08-15 | _EPI_ISL_129653_ | _A/Ohio/86/2012_                | _Garten_Rebecca_ |
| 2702 2012-08-16 | _EPI_ISL_129023_ | _A/Ohio/75/2012_                | _Garten_Rebecca_ |
| 2703 2012-08-16 | _EPI_ISL_129188_ | _A/Michigan/20/2012_            | _Garten_Rebecca_ |
| 2704 2012-08-16 | _EPI_ISL_129621_ | _A/Michigan/23/2012_            | _Garten_Rebecca_ |
| 2705 2012-08-16 | _EPI_ISL_129408_ | _A/Michigan/19/2012_            | _Garten_Rebecca_ |
| 2706 2012-08-16 | _EPI_ISL_129024_ | _A/Maryland/22/2012_            | _Garten_Rebecca_ |
| 2707 2012-08-17 | _EPI_ISL_128626_ | _A/Wisconsin/27/2012_           | _Garten_Rebecca_ |
| 2708 2012-08-17 | _EPI_ISL_129623_ | _A/Ohio/81/2012_                | _Garten_Rebecca_ |
| 2709 2012-08-17 | _EPI_ISL_189100_ | _A/Nicaragua/AGA2-85/2012_      | _EpiFluDB_       |
| 2710 2012-08-18 | _EPI_ISL_129430_ | _A/Maryland/23/2012_            | _Garten_Rebecca_ |
| 2711 2012-08-18 | _EPI_ISL_129176_ | _A/Maryland/25/2012_            | _Garten_Rebecca_ |
| 2712 2012-08-18 | _EPI_ISL_189099_ | _A/Nicaragua/AGA2-84/2012_      | _EpiFluDB_       |
| 2713 2012-08-19 | _EPI_ISL_129409_ | _A/Ohio/80/2012_                | _Garten_Rebecca_ |
| 2714 2012-08-20 | _EPI_ISL_129624_ | _A/Wisconsin/30/2012_           | _Garten_Rebecca_ |
| 2715 2012-08-20 | _EPI_ISL_129654_ | _A/Wisconsin/29/2012_           | _Garten_Rebecca_ |
| 2716 2012-08-20 | _EPI_ISL_189101_ | _A/Nicaragua/AGA2-86/2012_      | _EpiFluDB_       |
| 2717 2012-08-22 | _EPI_ISL_129625_ | _A/Wisconsin/31/2012_           | _Garten_Rebecca_ |
| 2718 2012-08-22 | _EPI_ISL_129709_ | _A/Wisconsin/35/2012_           | _Garten_Rebecca_ |
| 2719 2012-08-23 | _EPI_ISL_129189_ | _A/Pennsylvania/17/2012_        | _Garten_Rebecca_ |
| 2720 2012-08-28 | _EPI_ISL_129187_ | _A/Wisconsin/28/2012_           | _Garten_Rebecca_ |
| 2721 2012-08-28 | _EPI_ISL_174232_ | _A/Nicaragua/930_01_TR1/2012_   | _EpiFluDB_       |
| 2722 2012-08-30 | _EPI_ISL_174231_ | _A/Nicaragua/30014_01_TR2/2012_ | _EpiFluDB_       |
| 2723 2012-08-31 | _EPI_ISL_188986_ | _A/Nicaragua/AGA2-09/2012_      | _EpiFluDB_       |
| 2724 2012-08-31 | _EPI_ISL_205362_ | _A/Thailand/CU-H3368/2012_      | _EpiFluDB_       |
| 2725 2012-09-04 | _EPI_ISL_129651_ | _A/Ohio/83/2012_                | _Garten_Rebecca_ |
| 2726 2012-09-05 | _EPI_ISL_129622_ | _A/Minnesota/15/2012_           | _Garten_Rebecca_ |
| 2727 2012-09-05 | _EPI_ISL_188989_ | _A/Nicaragua/AGA2-11/2012_      | _EpiFluDB_       |
| 2728 2012-09-07 | _EPI_ISL_188994_ | _A/Nicaragua/AGA2-18/2012_      | _EpiFluDB_       |
| 2729 2012-09-10 | _EPI_ISL_129758_ | _A/Ohio/88/2012_                | _Garten_Rebecca_ |
| 2730 2012-09-12 | _EPI_ISL_147944_ | _A/Boston/DOA2-095/2012_        | _EpiFluDB_       |
| 2731 2012-09-13 | _EPI_ISL_147958_ | _A/Boston/DOA2-109/2012_        | _EpiFluDB_       |
| 2732 2012-09-13 | _EPI_ISL_162187_ | _A/Thailand/VIROAF6/2012_       | _EpiFluDB_       |
| 2733 2012-09-13 | _EPI_ISL_205358_ | _A/Thailand/CU-R6936/2012_      | _EpiFluDB_       |
| 2734 2012-09-15 | _EPI_ISL_188980_ | _A/Nicaragua/AGA2-01/2012_      | _EpiFluDB_       |
| 2735 2012-09-16 | _EPI_ISL_189000_ | _A/Nicaragua/AGA2-02/2012_      | _EpiFluDB_       |
| 2736 2012-09-18 | _EPI_ISL_188987_ | _A/Nicaragua/AGA2-06/2012_      | _EpiFluDB_       |
| 2737 2012-09-19 | _EPI_ISL_188982_ | _A/Nicaragua/AGA2-03/2012_      | _EpiFluDB_       |
| 2738 2012-09-19 | _EPI_ISL_188984_ | _A/Nicaragua/AGA2-04/2012_      | _EpiFluDB_       |
| 2739 2012-09-20 | _EPI_ISL_188985_ | _A/Nicaragua/AGA2-05/2012_      | _EpiFluDB_       |
| 2740 2012-09-20 | _EPI_ISL_188988_ | _A/Nicaragua/AGA2-07/2012_      | _EpiFluDB_       |
| 2741 2012-09-27 | _EPI_ISL_188983_ | _A/Nicaragua/AGA2-08/2012_      | _EpiFluDB_       |
| 2742 2012-09-29 | _EPI_ISL_188990_ | _A/Nicaragua/AGA2-12/2012_      | _EpiFluDB_       |
| 2743 2012-09-30 | _EPI_ISL_188991_ | _A/Nicaragua/AGA2-13/2012_      | _EpiFluDB_       |
| 2744 2012-10-01 | _EPI_ISL_188992_ | _A/Nicaragua/AGA2-14/2012_      | _EpiFluDB_       |
| 2745 2012-10-03 | _EPI_ISL_188993_ | _A/Nicaragua/AGA2-17/2012_      | _EpiFluDB_       |
| 2746 2012-10-05 | _EPI_ISL_162185_ | _A/Thailand/VIROAF1/2012_       | _EpiFluDB_       |
| 2747 2012-10-05 | _EPI_ISL_182836_ | _A/Thailand/VIROAF1CS/2012_     | _EpiFluDB_       |
| 2748 2012-10-08 | _EPI_ISL_188995_ | _A/Nicaragua/AGA2-19/2012_      | _EpiFluDB_       |
| 2749 2012-10-10 | _EPI_ISL_188997_ | _A/Nicaragua/AGA2-21/2012_      | _EpiFluDB_       |
| 2750 2012-10-11 | _EPI_ISL_147957_ | _A/Boston/DOA2-108/2012_        | _EpiFluDB_       |
| 2751 2012-10-11 | _EPI_ISL_189145_ | _A/Nicaragua/AGA2-107/2012_     | _EpiFluDB_       |
| 2752 2012-10-11 | _EPI_ISL_189146_ | _A/Nicaragua/AGA2-108/2012_     | _EpiFluDB_       |
| 2753 2012-10-11 | _EPI_ISL_188996_ | _A/Nicaragua/AGA2-20/2012_      | _EpiFluDB_       |
| 2754 2012-10-12 | _EPI_ISL_189143_ | _A/Nicaragua/AGA2-105/2012_     | _EpiFluDB_       |
| 2755 2012-10-12 | _EPI_ISL_189144_ | _A/Nicaragua/AGA2-106/2012_     | _EpiFluDB_       |
| 2756 2012-10-12 | _EPI_ISL_189106_ | _A/Nicaragua/AGA2-92/2012_      | _EpiFluDB_       |
| 2757 2012-10-15 | _EPI_ISL_189105_ | _A/Nicaragua/AGA2-91/2012_      | _EpiFluDB_       |
| 2758 2012-10-16 | _EPI_ISL_205363_ | _A/Thailand/CU-H3453/2012_      | _EpiFluDB_       |
| 2759 2012-10-17 | _EPI_ISL_189107_ | _A/Nicaragua/AGA2-93/2012_      | _EpiFluDB_       |
| 2760 2012-10-17 | _EPI_ISL_189108_ | _A/Nicaragua/AGA2-94/2012_      | _EpiFluDB_       |
| 2761 2012-10-18 | _EPI_ISL_131825_ | _A/Iowa/14/2012_                | _Cintron_Roxana_ |
| 2762 2012-10-20 | _EPI_ISL_138001_ | _A/New_York/39/2012_            | _Garten_Rebecca_ |
| 2763 2012-10-20 | _EPI_ISL_140279_ | _A/New_York/39/2012_            | _Garten_Rebecca_ |
| 2764 2012-10-20 | _EPI_ISL_136409_ | _A/New_York/39/2012_            | _Garten_Rebecca_ |
| 2765 2012-10-20 | _EPI_ISL_151400_ | _A/New_York/39/2012_            | _Garten_Rebecca_ |
| 2766 2012-10-20 | _EPI_ISL_164405_ | _A/New_York/39/2012_            | _Garten_Rebecca_ |
| 2767 2012-10-20 | _EPI_ISL_189109_ | _A/Nicaragua/AGA2-95/2012_      | _EpiFluDB_       |
| 2768 2012-10-22 | _EPI_ISL_134449_ | _A/Arizona/09/2012_             | _Garten_Rebecca_ |
| 2769 2012-10-22 | _EPI_ISL_189162_ | _A/Nicaragua/AGA2-97/2012_      | _EpiFluDB_       |
| 2770 2012-10-23 | _EPI_ISL_189137_ | _A/Nicaragua/AGA2-96/2012_      | _EpiFluDB_       |
| 2771 2012-10-26 | _EPI_ISL_160254_ | _A/Boston/YGA_00002/2012_       | _EpiFluDB_       |
| 2772 2012-10-26 | _EPI_ISL_189138_ | _A/Nicaragua/AGA2-100/2012_     | _EpiFluDB_       |
| 2773 2012-10-30 | _EPI_ISL_189139_ | _A/Nicaragua/AGA2-101/2012_     | _EpiFluDB_       |
| 2774 2012-10-30 | _EPI_ISL_189140_ | _A/Nicaragua/AGA2-102/2012_     | _EpiFluDB_       |
| 2775 2012-11-01 | _EPI_ISL_147956_ | _A/Boston/DOA2-107/2012_        | _EpiFluDB_       |
| 2776 2012-11-03 | _EPI_ISL_136432_ | _A/Texas/JMM_1/2012_            | _EpiFluDB_       |
| 2777 2012-11-03 | _EPI_ISL_189142_ | _A/Nicaragua/AGA2-104/2012_     | _EpiFluDB_       |
| 2778 2012-11-04 | _EPI_ISL_136433_ | _A/Texas/JMM_2/2012_            | _EpiFluDB_       |
| 2779 2012-11-06 | _EPI_ISL_189141_ | _A/Nicaragua/AGA2-103/2012_     | _EpiFluDB_       |

|                 |                  |                             |                  |
|-----------------|------------------|-----------------------------|------------------|
| 2780 2012-11-11 | _EPI_ISL_136441_ | _A/Texas/JMM_3/2012_        | _EpiFluDB_       |
| 2781 2012-11-11 | _EPI_ISL_189103_ | _A/Nicaragua/AGA2-89/2012_  | _EpiFluDB_       |
| 2782 2012-11-12 | _EPI_ISL_136442_ | _A/Texas/JMM_4/2012_        | _EpiFluDB_       |
| 2783 2012-11-12 | _EPI_ISL_147945_ | _A/Boston/DOA2-097/2012_    | _EpiFluDB_       |
| 2784 2012-11-12 | _EPI_ISL_189104_ | _A/Nicaragua/AGA2-90/2012_  | _EpiFluDB_       |
| 2785 2012-11-13 | _EPI_ISL_132657_ | _A/Minnesota/18/2012_       | _Garten_Rebecca_ |
| 2786 2012-11-14 | _EPI_ISL_136443_ | _A/Texas/JMM_5/2012_        | _EpiFluDB_       |
| 2787 2012-11-14 | _EPI_ISL_147955_ | _A/Boston/DOA2-106/2012_    | _EpiFluDB_       |
| 2788 2012-11-17 | _EPI_ISL_131801_ | _A/Iowa/16/2012_            | _Garten_Rebecca_ |
| 2789 2012-11-18 | _EPI_ISL_134008_ | _A/Michigan/32/2012_        | _Garten_Rebecca_ |
| 2790 2012-11-19 | _EPI_ISL_189147_ | _A/Nicaragua/AGA2-109/2012_ | _EpiFluDB_       |
| 2791 2012-11-20 | _EPI_ISL_136444_ | _A/Texas/JMM_8/2012_        | _EpiFluDB_       |
| 2792 2012-11-20 | _EPI_ISL_136445_ | _A/Texas/JMM_9/2012_        | _EpiFluDB_       |
| 2793 2012-11-20 | _EPI_ISL_136446_ | _A/Texas/JMM_10/2012_       | _EpiFluDB_       |
| 2794 2012-11-20 | _EPI_ISL_136447_ | _A/Texas/JMM_11/2012_       | _EpiFluDB_       |
| 2795 2012-11-20 | _EPI_ISL_136448_ | _A/Texas/JMM_12/2012_       | _EpiFluDB_       |
| 2796 2012-11-20 | _EPI_ISL_136449_ | _A/Texas/JMM_13/2012_       | _EpiFluDB_       |
| 2797 2012-11-21 | _EPI_ISL_136450_ | _A/Texas/JMM_14/2012_       | _EpiFluDB_       |
| 2798 2012-11-22 | _EPI_ISL_136451_ | _A/Texas/JMM_15/2012_       | _EpiFluDB_       |
| 2799 2012-11-24 | _EPI_ISL_136452_ | _A/Texas/JMM_16/2012_       | _EpiFluDB_       |
| 2800 2012-11-24 | _EPI_ISL_136453_ | _A/Texas/JMM_17/2012_       | _EpiFluDB_       |
| 2801 2012-11-24 | _EPI_ISL_136454_ | _A/Texas/JMM_18/2012_       | _EpiFluDB_       |
| 2802 2012-11-25 | _EPI_ISL_136455_ | _A/Texas/JMM_19/2012_       | _EpiFluDB_       |
| 2803 2012-11-25 | _EPI_ISL_136456_ | _A/Texas/JMM_20/2012_       | _EpiFluDB_       |
| 2804 2012-11-25 | _EPI_ISL_136457_ | _A/Texas/JMM_21/2012_       | _EpiFluDB_       |
| 2805 2012-11-25 | _EPI_ISL_136458_ | _A/Texas/JMM_22/2012_       | _EpiFluDB_       |
| 2806 2012-11-25 | _EPI_ISL_136459_ | _A/Texas/JMM_23/2012_       | _EpiFluDB_       |
| 2807 2012-11-26 | _EPI_ISL_136460_ | _A/Texas/JMM_24/2012_       | _EpiFluDB_       |
| 2808 2012-11-26 | _EPI_ISL_136480_ | _A/Texas/JMM_25/2012_       | _EpiFluDB_       |
| 2809 2012-11-26 | _EPI_ISL_136481_ | _A/Texas/JMM_26/2012_       | _EpiFluDB_       |
| 2810 2012-11-26 | _EPI_ISL_205359_ | _A/Thailand/CU-87235/2012_  | _EpiFluDB_       |
| 2811 2012-11-27 | _EPI_ISL_160255_ | _A/Boston/YGA_00003/2012_   | _EpiFluDB_       |
| 2812 2012-11-28 | _EPI_ISL_136482_ | _A/Texas/JMM_27/2012_       | _EpiFluDB_       |
| 2813 2012-11-28 | _EPI_ISL_136483_ | _A/Texas/JMM_29/2012_       | _EpiFluDB_       |
| 2814 2012-11-28 | _EPI_ISL_136484_ | _A/Texas/JMM_30/2012_       | _EpiFluDB_       |
| 2815 2012-11-28 | _EPI_ISL_136485_ | _A/Texas/JMM_31/2012_       | _EpiFluDB_       |
| 2816 2012-11-28 | _EPI_ISL_136486_ | _A/Texas/JMM_32/2012_       | _EpiFluDB_       |
| 2817 2012-11-29 | _EPI_ISL_136487_ | _A/Texas/JMM_33/2012_       | _EpiFluDB_       |
| 2818 2012-11-29 | _EPI_ISL_136488_ | _A/Texas/JMM_34/2012_       | _EpiFluDB_       |
| 2819 2012-11-29 | _EPI_ISL_136489_ | _A/Texas/JMM_35/2012_       | _EpiFluDB_       |
| 2820 2012-11-29 | _EPI_ISL_136490_ | _A/Texas/JMM_36/2012_       | _EpiFluDB_       |
| 2821 2012-11-30 | _EPI_ISL_136491_ | _A/Texas/JMM_37/2012_       | _EpiFluDB_       |
| 2822 2012-11-30 | _EPI_ISL_136492_ | _A/Texas/JMM_38/2012_       | _EpiFluDB_       |
| 2823 2012-11-30 | _EPI_ISL_136493_ | _A/Texas/JMM_39/2012_       | _EpiFluDB_       |
| 2824 2012-12-01 | _EPI_ISL_136494_ | _A/Texas/JMM_40/2012_       | _EpiFluDB_       |
| 2825 2012-12-01 | _EPI_ISL_136495_ | _A/Texas/JMM_41/2012_       | _EpiFluDB_       |
| 2826 2012-12-02 | _EPI_ISL_136496_ | _A/Texas/JMM_43/2012_       | _EpiFluDB_       |
| 2827 2012-12-02 | _EPI_ISL_136497_ | _A/Texas/JMM_44/2012_       | _EpiFluDB_       |
| 2828 2012-12-02 | _EPI_ISL_147960_ | _A/Boston/DOA2-111/2012_    | _EpiFluDB_       |
| 2829 2012-12-02 | _EPI_ISL_147962_ | _A/Boston/DOA2-113/2012_    | _EpiFluDB_       |
| 2830 2012-12-03 | _EPI_ISL_134009_ | _A/Michigan/33/2012_        | _Garten_Rebecca_ |
| 2831 2012-12-03 | _EPI_ISL_136498_ | _A/Texas/JMM_45/2012_       | _EpiFluDB_       |
| 2832 2012-12-03 | _EPI_ISL_147963_ | _A/Boston/DOA2-114/2012_    | _EpiFluDB_       |
| 2833 2012-12-03 | _EPI_ISL_147965_ | _A/Boston/DOA2-116/2012_    | _EpiFluDB_       |
| 2834 2012-12-04 | _EPI_ISL_136499_ | _A/Texas/JMM_46/2012_       | _EpiFluDB_       |
| 2835 2012-12-04 | _EPI_ISL_136500_ | _A/Texas/JMM_47/2012_       | _EpiFluDB_       |
| 2836 2012-12-04 | _EPI_ISL_136501_ | _A/Texas/JMM_48/2012_       | _EpiFluDB_       |
| 2837 2012-12-04 | _EPI_ISL_147961_ | _A/Boston/DOA2-112/2012_    | _EpiFluDB_       |
| 2838 2012-12-05 | _EPI_ISL_147964_ | _A/Boston/DOA2-115/2012_    | _EpiFluDB_       |
| 2839 2012-12-05 | _EPI_ISL_160256_ | _A/Boston/YGA_00004/2012_   | _EpiFluDB_       |
| 2840 2012-12-06 | _EPI_ISL_136502_ | _A/Texas/JMM_49/2012_       | _EpiFluDB_       |
| 2841 2012-12-06 | _EPI_ISL_136503_ | _A/Texas/JMM_50/2012_       | _EpiFluDB_       |
| 2842 2012-12-06 | _EPI_ISL_136504_ | _A/Texas/JMM_51/2012_       | _EpiFluDB_       |
| 2843 2012-12-06 | _EPI_ISL_136507_ | _A/Texas/JMM_54/2012_       | _EpiFluDB_       |
| 2844 2012-12-06 | _EPI_ISL_189148_ | _A/Nicaragua/AGA2-110/2012_ | _EpiFluDB_       |
| 2845 2012-12-07 | _EPI_ISL_136508_ | _A/Texas/JMM_56/2012_       | _EpiFluDB_       |
| 2846 2012-12-07 | _EPI_ISL_136509_ | _A/Texas/JMM_57/2012_       | _EpiFluDB_       |
| 2847 2012-12-07 | _EPI_ISL_136510_ | _A/Texas/JMM_58/2012_       | _EpiFluDB_       |
| 2848 2012-12-07 | _EPI_ISL_147959_ | _A/Boston/DOA2-110/2012_    | _EpiFluDB_       |
| 2849 2012-12-07 | _EPI_ISL_147966_ | _A/Boston/DOA2-117/2012_    | _EpiFluDB_       |
| 2850 2012-12-08 | _EPI_ISL_136511_ | _A/Texas/JMM_59/2012_       | _EpiFluDB_       |
| 2851 2012-12-08 | _EPI_ISL_136512_ | _A/Texas/JMM_60/2012_       | _EpiFluDB_       |
| 2852 2012-12-09 | _EPI_ISL_189154_ | _A/Houston/JMM_61/2012_     | _EpiFluDB_       |
| 2853 2012-12-09 | _EPI_ISL_189155_ | _A/Houston/JMM_62/2012_     | _EpiFluDB_       |
| 2854 2012-12-10 | _EPI_ISL_147987_ | _A/Boston/DOA2-140/2012_    | _EpiFluDB_       |
| 2855 2012-12-10 | _EPI_ISL_189156_ | _A/Houston/JMM_63/2012_     | _EpiFluDB_       |
| 2856 2012-12-12 | _EPI_ISL_147947_ | _A/Boston/DOA2-098/2012_    | _EpiFluDB_       |
| 2857 2012-12-12 | _EPI_ISL_189158_ | _A/Houston/JMM_65/2012_     | _EpiFluDB_       |
| 2858 2012-12-12 | _EPI_ISL_189159_ | _A/Houston/JMM_66/2012_     | _EpiFluDB_       |
| 2859 2012-12-13 | _EPI_ISL_147949_ | _A/Boston/DOA2-100/2012_    | _EpiFluDB_       |
| 2860 2012-12-13 | _EPI_ISL_189160_ | _A/Houston/JMM_67/2012_     | _EpiFluDB_       |
| 2861 2012-12-13 | _EPI_ISL_189161_ | _A/Houston/JMM_68/2012_     | _EpiFluDB_       |
| 2862 2012-12-14 | _EPI_ISL_147950_ | _A/Boston/DOA2-101/2012_    | _EpiFluDB_       |
| 2863 2012-12-14 | _EPI_ISL_160257_ | _A/Boston/YGA_00006/2012_   | _EpiFluDB_       |
| 2864 2012-12-14 | _EPI_ISL_189198_ | _A/Houston/JMM_69/2012_     | _EpiFluDB_       |
| 2865 2012-12-14 | _EPI_ISL_189233_ | _A/Houston/JMM_70/2012_     | _EpiFluDB_       |
| 2866 2012-12-15 | _EPI_ISL_147951_ | _A/Boston/DOA2-102/2012_    | _EpiFluDB_       |
| 2867 2012-12-15 | _EPI_ISL_189199_ | _A/Houston/JMM_71/2012_     | _EpiFluDB_       |
| 2868 2012-12-15 | _EPI_ISL_189200_ | _A/Houston/JMM_72/2012_     | _EpiFluDB_       |
| 2869 2012-12-15 | _EPI_ISL_189201_ | _A/Houston/JMM_73/2012_     | _EpiFluDB_       |
| 2870 2012-12-15 | _EPI_ISL_189202_ | _A/Houston/JMM_74/2012_     | _EpiFluDB_       |
| 2871 2012-12-16 | _EPI_ISL_147974_ | _A/Boston/DOA2-126/2012_    | _EpiFluDB_       |
| 2872 2012-12-16 | _EPI_ISL_189203_ | _A/Houston/JMM_75/2012_     | _EpiFluDB_       |
| 2873 2012-12-16 | _EPI_ISL_189204_ | _A/Houston/JMM_76/2012_     | _EpiFluDB_       |
| 2874 2012-12-16 | _EPI_ISL_189205_ | _A/Houston/JMM_77/2012_     | _EpiFluDB_       |
| 2875 2012-12-17 | _EPI_ISL_147952_ | _A/Boston/DOA2-103/2012_    | _EpiFluDB_       |
| 2876 2012-12-17 | _EPI_ISL_147975_ | _A/Boston/DOA2-127/2012_    | _EpiFluDB_       |
| 2877 2012-12-17 | _EPI_ISL_189206_ | _A/Houston/JMM_78/2012_     | _EpiFluDB_       |
| 2878 2012-12-17 | _EPI_ISL_189207_ | _A/Houston/JMM_79/2012_     | _EpiFluDB_       |
| 2879 2012-12-18 | _EPI_ISL_147976_ | _A/Boston/DOA2-128/2012_    | _EpiFluDB_       |
| 2880 2012-12-18 | _EPI_ISL_147977_ | _A/Boston/DOA2-129/2012_    | _EpiFluDB_       |
| 2881 2012-12-18 | _EPI_ISL_147978_ | _A/Boston/DOA2-130/2012_    | _EpiFluDB_       |
| 2882 2012-12-18 | _EPI_ISL_147989_ | _A/Boston/DOA2-143/2012_    | _EpiFluDB_       |
| 2883 2012-12-18 | _EPI_ISL_160258_ | _A/Boston/YGA_00007/2012_   | _EpiFluDB_       |
| 2884 2012-12-18 | _EPI_ISL_189210_ | _A/Houston/JMM_81/2012_     | _EpiFluDB_       |
| 2885 2012-12-18 | _EPI_ISL_189211_ | _A/Houston/JMM_82/2012_     | _EpiFluDB_       |
| 2886 2012-12-18 | _EPI_ISL_189208_ | _A/Houston/JMM_80/2012_     | _EpiFluDB_       |
| 2887 2012-12-19 | _EPI_ISL_147979_ | _A/Boston/DOA2-131/2012_    | _EpiFluDB_       |
| 2888 2012-12-19 | _EPI_ISL_147980_ | _A/Boston/DOA2-132/2012_    | _EpiFluDB_       |
| 2889 2012-12-19 | _EPI_ISL_160259_ | _A/Boston/YGA_00008/2012_   | _EpiFluDB_       |
| 2890 2012-12-19 | _EPI_ISL_189212_ | _A/Houston/JMM_84/2012_     | _EpiFluDB_       |
| 2891 2012-12-19 | _EPI_ISL_189213_ | _A/Houston/JMM_85/2012_     | _EpiFluDB_       |
| 2892 2012-12-20 | _EPI_ISL_147981_ | _A/Boston/DOA2-133/2012_    | _EpiFluDB_       |
| 2893 2012-12-20 | _EPI_ISL_147982_ | _A/Boston/DOA2-134/2012_    | _EpiFluDB_       |
| 2894 2012-12-20 | _EPI_ISL_147983_ | _A/Boston/DOA2-135/2012_    | _EpiFluDB_       |
| 2895 2012-12-20 | _EPI_ISL_147984_ | _A/Boston/DOA2-136/2012_    | _EpiFluDB_       |
| 2896 2012-12-20 | _EPI_ISL_147986_ | _A/Boston/DOA2-138/2012_    | _EpiFluDB_       |
| 2897 2012-12-20 | _EPI_ISL_160260_ | _A/Boston/YGA_00009/2012_   | _EpiFluDB_       |
| 2898 2012-12-20 | _EPI_ISL_160261_ | _A/Boston/YGA_00010/2012_   | _EpiFluDB_       |
| 2899 2012-12-20 | _EPI_ISL_189214_ | _A/Houston/JMM_86/2012_     | _EpiFluDB_       |
| 2900 2012-12-20 | _EPI_ISL_189215_ | _A/Houston/JMM_87/2012_     | _EpiFluDB_       |

|                                   |                 |                             |                  |
|-----------------------------------|-----------------|-----------------------------|------------------|
| 2901 2012-12-21                   | _EPI_ISL_147946 | _A/Boston/DOA2-141/2012     | _EpiFluDB        |
| 2902 2012-12-21                   | _EPI_ISL_147954 | _A/Boston/DOA2-105/2012     | _EpiFluDB        |
| 2903 2012-12-21                   | _EPI_ISL_147985 | _A/Boston/DOA2-137/2012     | _EpiFluDB        |
| 2904 2012-12-21                   | _EPI_ISL_147988 | _A/Boston/DOA2-142/2012     | _EpiFluDB        |
| 2905 2012-12-21                   | _EPI_ISL_189216 | _A/Houston/JMM_88/2012      | _EpiFluDB        |
| 2906 2012-12-22                   | _EPI_ISL_147953 | _A/Boston/DOA2-104/2012     | _EpiFluDB        |
| 2907 2012-12-22                   | _EPI_ISL_189217 | _A/Houston/JMM_90/2012      | _EpiFluDB        |
| 2908 2012-12-22                   | _EPI_ISL_189218 | _A/Houston/JMM_91/2012      | _EpiFluDB        |
| 2909 2012-12-22                   | _EPI_ISL_205360 | _A/Thailand/CU-87367/2012   | _EpiFluDB        |
| 2910 2012-12-23                   | _EPI_ISL_189219 | _A/Houston/JMM_92/2012      | _EpiFluDB        |
| 2911 2012-12-24                   | _EPI_ISL_147967 | _A/Boston/DOA2-119/2012     | _EpiFluDB        |
| 2912 2012-12-24                   | _EPI_ISL_147968 | _A/Boston/DOA2-120/2012     | _EpiFluDB        |
| 2913 2012-12-24                   | _EPI_ISL_147969 | _A/Boston/DOA2-121/2012     | _EpiFluDB        |
| 2914 2012-12-26                   | _EPI_ISL_147970 | _A/Boston/DOA2-122/2012     | _EpiFluDB        |
| 2915 2012-12-26                   | _EPI_ISL_147971 | _A/Boston/DOA2-123/2012     | _EpiFluDB        |
| 2916 2012-12-26                   | _EPI_ISL_147972 | _A/Boston/DOA2-124/2012     | _EpiFluDB        |
| 2917 2012-12-27                   | _EPI_ISL_160262 | _A/Boston/YGA_00011/2012    | _EpiFluDB        |
| 2918 2012-12-27                   | _EPI_ISL_160263 | _A/Boston/YGA_00012/2012    | _EpiFluDB        |
| 2919 2012-12-28                   | _EPI_ISL_148042 | _A/Boston/DOA2-209/2012     | _EpiFluDB        |
| 2920 2012-12-28                   | _EPI_ISL_148052 | _A/Boston/DOA2-222/2012     | _EpiFluDB        |
| 2921 2012-12-28                   | _EPI_ISL_160264 | _A/Boston/YGA_00014/2012    | _EpiFluDB        |
| 2922 2012-12-28                   | _EPI_ISL_160265 | _A/Boston/YGA_00015/2012    | _EpiFluDB        |
| 2923 2012-12-28                   | _EPI_ISL_160266 | _A/Boston/YGA_00016/2012    | _EpiFluDB        |
| 2924 2012-12-28                   | _EPI_ISL_173299 | _A/Vietnam/13V_H3-2/2012    | Hiroki_Kondo_    |
| 2925 2012-12-28                   | _EPI_ISL_189221 | _A/Houston/JMM_94/2012      | _EpiFluDB        |
| 2926 2012-12-28                   | _EPI_ISL_189222 | _A/Houston/JMM_95/2012      | _EpiFluDB        |
| 2927 2012-12-29                   | _EPI_ISL_148000 | _A/Boston/DOA2-155/2012     | _EpiFluDB        |
| 2928 2012-12-29                   | _EPI_ISL_148012 | _A/Boston/DOA2-171/2012     | _EpiFluDB        |
| 2929 2012-12-29                   | _EPI_ISL_148039 | _A/Boston/DOA2-203/2012     | _EpiFluDB        |
| 2930 2012-12-29                   | _EPI_ISL_148049 | _A/Boston/DOA2-219/2012     | _EpiFluDB        |
| 2931 2012-12-29                   | _EPI_ISL_160267 | _A/Boston/YGA_00017/2012    | _EpiFluDB        |
| 2932 2012-12-29                   | _EPI_ISL_189223 | _A/Houston/JMM_96/2012      | _EpiFluDB        |
| 2933 2012-12-29                   | _EPI_ISL_189224 | _A/Houston/JMM_97/2012      | _EpiFluDB        |
| 2934 2012-12-29                   | _EPI_ISL_189225 | _A/Houston/JMM_98/2012      | _EpiFluDB        |
| 2935 2012-12-29                   | _EPI_ISL_189226 | _A/Houston/JMM_99/2012      | _EpiFluDB        |
| 2936 2012-12-30                   | _EPI_ISL_147993 | _A/Boston/DOA2-147/2012     | _EpiFluDB        |
| 2937 2012-12-30                   | _EPI_ISL_148053 | _A/Boston/DOA2-223/2012     | _EpiFluDB        |
| 2938 2012-12-31                   | _EPI_ISL_148009 | _A/Boston/DOA2-167/2012     | _EpiFluDB        |
| 2939 2012-12-31                   | _EPI_ISL_148010 | _A/Boston/DOA2-169/2012     | _EpiFluDB        |
| 2940 2012-12-31                   | _EPI_ISL_160268 | _A/Boston/YGA_00019/2012    | _EpiFluDB        |
| 2941 2013_(Month_and_day_unknown) | _EPI_ISL_148132 | _A/Boston/DOA2-168/2013     | _EpiFluDB        |
| 2942 2013_(Month_and_day_unknown) | _EPI_ISL_166310 | _A/Switzerland/9715293/2013 | _Garten_Rebecca_ |
| 2943 2013-01-01                   | _EPI_ISL_148033 | _A/Boston/DOA2-192/2013     | _EpiFluDB        |
| 2944 2013-01-01                   | _EPI_ISL_148054 | _A/Boston/DOA2-224/2013     | _EpiFluDB        |
| 2945 2013-01-01                   | _EPI_ISL_189227 | _A/Houston/JMM_101/2013     | _EpiFluDB        |
| 2946 2013-01-01                   | _EPI_ISL_189228 | _A/Houston/JMM_102/2013     | _EpiFluDB        |
| 2947 2013-01-02                   | _EPI_ISL_148005 | _A/Boston/DOA2-161/2013     | _EpiFluDB        |
| 2948 2013-01-02                   | _EPI_ISL_148017 | _A/Boston/DOA2-176/2013     | _EpiFluDB        |
| 2949 2013-01-02                   | _EPI_ISL_148031 | _A/Boston/DOA2-191/2013     | _EpiFluDB        |
| 2950 2013-01-02                   | _EPI_ISL_189229 | _A/Houston/JMM_103/2013     | _EpiFluDB        |
| 2951 2013-01-02                   | _EPI_ISL_189230 | _A/Houston/JMM_104/2013     | _EpiFluDB        |
| 2952 2013-01-02                   | _EPI_ISL_189231 | _A/Houston/JMM_105/2013     | _EpiFluDB        |
| 2953 2013-01-02                   | _EPI_ISL_189232 | _A/Houston/JMM_106/2013     | _EpiFluDB        |
| 2954 2013-01-03                   | _EPI_ISL_148003 | _A/Boston/DOA2-158/2013     | _EpiFluDB        |
| 2955 2013-01-03                   | _EPI_ISL_148041 | _A/Boston/DOA2-207/2013     | _EpiFluDB        |
| 2956 2013-01-03                   | _EPI_ISL_148062 | _A/Boston/DOA2-233/2013     | _EpiFluDB        |
| 2957 2013-01-03                   | _EPI_ISL_189265 | _A/Houston/JMM_109/2013     | _EpiFluDB        |
| 2958 2013-01-03                   | _EPI_ISL_189266 | _A/Houston/JMM_110/2013     | _EpiFluDB        |
| 2959 2013-01-03                   | _EPI_ISL_189264 | _A/Houston/JMM_107/2013     | _EpiFluDB        |
| 2960 2013-01-03                   | _EPI_ISL_189293 | _A/Houston/JMM_108/2013     | _EpiFluDB        |
| 2961 2013-01-04                   | _EPI_ISL_148008 | _A/Boston/DOA2-166/2013     | _EpiFluDB        |
| 2962 2013-01-04                   | _EPI_ISL_148015 | _A/Boston/DOA2-174/2013     | _EpiFluDB        |
| 2963 2013-01-04                   | _EPI_ISL_148065 | _A/Boston/DOA2-238/2013     | _EpiFluDB        |
| 2964 2013-01-04                   | _EPI_ISL_148068 | _A/Boston/DOA2-241/2013     | _EpiFluDB        |
| 2965 2013-01-04                   | _EPI_ISL_148069 | _A/Boston/DOA2-242/2013     | _EpiFluDB        |
| 2966 2013-01-04                   | _EPI_ISL_189267 | _A/Houston/JMM_111/2013     | _EpiFluDB        |
| 2967 2013-01-04                   | _EPI_ISL_189268 | _A/Houston/JMM_112/2013     | _EpiFluDB        |
| 2968 2013-01-04                   | _EPI_ISL_189269 | _A/Houston/JMM_113/2013     | _EpiFluDB        |
| 2969 2013-01-05                   | _EPI_ISL_147996 | _A/Boston/DOA2-150/2013     | _EpiFluDB        |
| 2970 2013-01-05                   | _EPI_ISL_148056 | _A/Boston/DOA2-226/2013     | _EpiFluDB        |
| 2971 2013-01-05                   | _EPI_ISL_148058 | _A/Boston/DOA2-228/2013     | _EpiFluDB        |
| 2972 2013-01-05                   | _EPI_ISL_189272 | _A/Houston/JMM_117/2013     | _EpiFluDB        |
| 2973 2013-01-05                   | _EPI_ISL_189273 | _A/Houston/JMM_118/2013     | _EpiFluDB        |
| 2974 2013-01-05                   | _EPI_ISL_189270 | _A/Houston/JMM_115/2013     | _EpiFluDB        |
| 2975 2013-01-05                   | _EPI_ISL_189271 | _A/Houston/JMM_116/2013     | _EpiFluDB        |
| 2976 2013-01-06                   | _EPI_ISL_148014 | _A/Boston/DOA2-173/2013     | _EpiFluDB        |
| 2977 2013-01-06                   | _EPI_ISL_148016 | _A/Boston/DOA2-175/2013     | _EpiFluDB        |
| 2978 2013-01-06                   | _EPI_ISL_148026 | _A/Boston/DOA2-185/2013     | _EpiFluDB        |
| 2979 2013-01-07                   | _EPI_ISL_139917 | _A/Washington/07/2013       | _Garten_Rebecca_ |
| 2980 2013-01-07                   | _EPI_ISL_148018 | _A/Boston/DOA2-177/2013     | _EpiFluDB        |
| 2981 2013-01-07                   | _EPI_ISL_148025 | _A/Boston/DOA2-184/2013     | _EpiFluDB        |
| 2982 2013-01-07                   | _EPI_ISL_148045 | _A/Boston/DOA2-214/2013     | _EpiFluDB        |
| 2983 2013-01-07                   | _EPI_ISL_148050 | _A/Boston/DOA2-220/2013     | _EpiFluDB        |
| 2984 2013-01-07                   | _EPI_ISL_148063 | _A/Boston/DOA2-235/2013     | _EpiFluDB        |
| 2985 2013-01-07                   | _EPI_ISL_189274 | _A/Houston/JMM_119/2013     | _EpiFluDB        |
| 2986 2013-01-08                   | _EPI_ISL_147994 | _A/Boston/DOA2-148/2013     | _EpiFluDB        |
| 2987 2013-01-08                   | _EPI_ISL_148019 | _A/Boston/DOA2-178/2013     | _EpiFluDB        |
| 2988 2013-01-08                   | _EPI_ISL_148023 | _A/Boston/DOA2-182/2013     | _EpiFluDB        |
| 2989 2013-01-08                   | _EPI_ISL_148067 | _A/Boston/DOA2-240/2013     | _EpiFluDB        |
| 2990 2013-01-08                   | _EPI_ISL_189278 | _A/Houston/JMM_123/2013     | _EpiFluDB        |
| 2991 2013-01-08                   | _EPI_ISL_189279 | _A/Houston/JMM_124/2013     | _EpiFluDB        |
| 2992 2013-01-08                   | _EPI_ISL_189280 | _A/Houston/JMM_125/2013     | _EpiFluDB        |
| 2993 2013-01-08                   | _EPI_ISL_189281 | _A/Houston/JMM_126/2013     | _EpiFluDB        |
| 2994 2013-01-08                   | _EPI_ISL_189275 | _A/Houston/JMM_120/2013     | _EpiFluDB        |
| 2995 2013-01-08                   | _EPI_ISL_189276 | _A/Houston/JMM_121/2013     | _EpiFluDB        |
| 2996 2013-01-09                   | _EPI_ISL_141557 | _A/SOUTH_AUSTRALIA/2/2013   | _Komadina_Naomi_ |
| 2997 2013-01-09                   | _EPI_ISL_147995 | _A/Boston/DOA2-149/2013     | _EpiFluDB        |
| 2998 2013-01-09                   | _EPI_ISL_148005 | _A/Boston/DOA2-157/2013     | _EpiFluDB        |
| 2999 2013-01-09                   | _EPI_ISL_148024 | _A/Boston/DOA2-183/2013     | _EpiFluDB        |
| 3000 2013-01-09                   | _EPI_ISL_148044 | _A/Boston/DOA2-212/2013     | _EpiFluDB        |
| 3001 2013-01-09                   | _EPI_ISL_148066 | _A/Boston/DOA2-239/2013     | _EpiFluDB        |
| 3002 2013-01-09                   | _EPI_ISL_189282 | _A/Houston/JMM_127/2013     | _EpiFluDB        |
| 3003 2013-01-09                   | _EPI_ISL_189283 | _A/Houston/JMM_128/2013     | _EpiFluDB        |
| 3004 2013-01-09                   | _EPI_ISL_189285 | _A/Houston/JMM_130/2013     | _EpiFluDB        |
| 3005 2013-01-10                   | _EPI_ISL_147997 | _A/Boston/DOA2-151/2013     | _EpiFluDB        |
| 3006 2013-01-10                   | _EPI_ISL_148004 | _A/Boston/DOA2-159/2013     | _EpiFluDB        |
| 3007 2013-01-10                   | _EPI_ISL_148061 | _A/Boston/DOA2-232/2013     | _EpiFluDB        |
| 3008 2013-01-10                   | _EPI_ISL_148064 | _A/Boston/DOA2-236/2013     | _EpiFluDB        |
| 3009 2013-01-10                   | _EPI_ISL_148070 | _A/Boston/DOA2-243/2013     | _EpiFluDB        |
| 3010 2013-01-10                   | _EPI_ISL_189287 | _A/Houston/JMM_132/2013     | _EpiFluDB        |
| 3011 2013-01-11                   | _EPI_ISL_148007 | _A/Boston/DOA2-163/2013     | _EpiFluDB        |
| 3012 2013-01-11                   | _EPI_ISL_148027 | _A/Boston/DOA2-186/2013     | _EpiFluDB        |
| 3013 2013-01-11                   | _EPI_ISL_148038 | _A/Boston/DOA2-202/2013     | _EpiFluDB        |
| 3014 2013-01-11                   | _EPI_ISL_148057 | _A/Boston/DOA2-227/2013     | _EpiFluDB        |
| 3015 2013-01-11                   | _EPI_ISL_148059 | _A/Boston/DOA2-229/2013     | _EpiFluDB        |
| 3016 2013-01-11                   | _EPI_ISL_189288 | _A/Houston/JMM_134/2013     | _EpiFluDB        |
| 3017 2013-01-11                   | _EPI_ISL_189289 | _A/Houston/JMM_135/2013     | _EpiFluDB        |
| 3018 2013-01-11                   | _EPI_ISL_189290 | _A/Houston/JMM_136/2013     | _EpiFluDB        |
| 3019 2013-01-11                   | _EPI_ISL_189291 | _A/Houston/JMM_137/2013     | _EpiFluDB        |
| 3020 2013-01-12                   | _EPI_ISL_148011 | _A/Boston/DOA2-170/2013     | _EpiFluDB        |
| 3021 2013-01-12                   | _EPI_ISL_189292 | _A/Houston/JMM_139/2013     | _EpiFluDB        |

|      |             |                  |                                 |                  |
|------|-------------|------------------|---------------------------------|------------------|
| 3022 | 2013-01-12_ | _EPI_ISL_189302_ | _A/Houston/JMM_140/2013_        | _EpiFluDB_       |
| 3023 | 2013-01-12_ | _EPI_ISL_189308_ | _A/Houston/JMM_141/2013_        | _EpiFluDB_       |
| 3024 | 2013-01-12_ | _EPI_ISL_189303_ | _A/Houston/JMM_142/2013_        | _EpiFluDB_       |
| 3025 | 2013-01-13_ | _EPI_ISL_148001_ | _A/Boston/DOA2-156/2013_        | _EpiFluDB_       |
| 3026 | 2013-01-13_ | _EPI_ISL_148021_ | _A/Boston/DOA2-180/2013_        | _EpiFluDB_       |
| 3027 | 2013-01-13_ | _EPI_ISL_189304_ | _A/Houston/JMM_144/2013_        | _EpiFluDB_       |
| 3028 | 2013-01-14_ | _EPI_ISL_141550_ | _A/NEWCASTLE/1/2013_            | _Komadina_Naomi_ |
| 3029 | 2013-01-14_ | _EPI_ISL_148029_ | _A/Boston/DOA2-189/2013_        | _EpiFluDB_       |
| 3030 | 2013-01-14_ | _EPI_ISL_189305_ | _A/Houston/JMM_145/2013_        | _EpiFluDB_       |
| 3031 | 2013-01-14_ | _EPI_ISL_189630_ | _A/Houston/JMM_167/2013_        | _EpiFluDB_       |
| 3032 | 2013-01-14_ | _EPI_ISL_189631_ | _A/Houston/JMM_168/2013_        | _EpiFluDB_       |
| 3033 | 2013-01-14_ | _EPI_ISL_189637_ | _A/Houston/JMM_175/2013_        | _EpiFluDB_       |
| 3034 | 2013-01-15_ | _EPI_ISL_148020_ | _A/Boston/DOA2-179/2013_        | _EpiFluDB_       |
| 3035 | 2013-01-15_ | _EPI_ISL_148037_ | _A/Boston/DOA2-201/2013_        | _EpiFluDB_       |
| 3036 | 2013-01-15_ | _EPI_ISL_148046_ | _A/Boston/DOA2-215/2013_        | _EpiFluDB_       |
| 3037 | 2013-01-15_ | _EPI_ISL_148047_ | _A/Boston/DOA2-217/2013_        | _EpiFluDB_       |
| 3038 | 2013-01-15_ | _EPI_ISL_148048_ | _A/Boston/DOA2-218/2013_        | _EpiFluDB_       |
| 3039 | 2013-01-15_ | _EPI_ISL_189640_ | _A/Houston/JMM_178/2013_        | _EpiFluDB_       |
| 3040 | 2013-01-15_ | _EPI_ISL_189639_ | _A/Houston/JMM_177/2013_        | _EpiFluDB_       |
| 3041 | 2013-01-15_ | _EPI_ISL_189624_ | _A/Houston/JMM_160/2013_        | _EpiFluDB_       |
| 3042 | 2013-01-16_ | _EPI_ISL_147990_ | _A/Boston/DOA2-144/2013_        | _EpiFluDB_       |
| 3043 | 2013-01-16_ | _EPI_ISL_147999_ | _A/Boston/DOA2-154/2013_        | _EpiFluDB_       |
| 3044 | 2013-01-16_ | _EPI_ISL_148028_ | _A/Boston/DOA2-187/2013_        | _EpiFluDB_       |
| 3045 | 2013-01-17_ | _EPI_ISL_148013_ | _A/Boston/DOA2-172/2013_        | _EpiFluDB_       |
| 3046 | 2013-01-17_ | _EPI_ISL_148034_ | _A/Boston/DOA2-194/2013_        | _EpiFluDB_       |
| 3047 | 2013-01-17_ | _EPI_ISL_148036_ | _A/Boston/DOA2-199/2013_        | _EpiFluDB_       |
| 3048 | 2013-01-17_ | _EPI_ISL_148060_ | _A/Boston/DOA2-230/2013_        | _EpiFluDB_       |
| 3049 | 2013-01-17_ | _EPI_ISL_189638_ | _A/Houston/JMM_176/2013_        | _EpiFluDB_       |
| 3050 | 2013-01-18_ | _EPI_ISL_147998_ | _A/Boston/DOA2-153/2013_        | _EpiFluDB_       |
| 3051 | 2013-01-18_ | _EPI_ISL_148022_ | _A/Boston/DOA2-181/2013_        | _EpiFluDB_       |
| 3052 | 2013-01-18_ | _EPI_ISL_148040_ | _A/Boston/DOA2-206/2013_        | _EpiFluDB_       |
| 3053 | 2013-01-19_ | _EPI_ISL_189306_ | _A/Houston/JMM_146/2013_        | _EpiFluDB_       |
| 3054 | 2013-01-19_ | _EPI_ISL_189307_ | _A/Houston/JMM_147/2013_        | _EpiFluDB_       |
| 3055 | 2013-01-20_ | _EPI_ISL_147991_ | _A/Boston/DOA2-145/2013_        | _EpiFluDB_       |
| 3056 | 2013-01-20_ | _EPI_ISL_147992_ | _A/Boston/DOA2-146/2013_        | _EpiFluDB_       |
| 3057 | 2013-01-20_ | _EPI_ISL_189636_ | _A/Houston/JMM_174/2013_        | _EpiFluDB_       |
| 3058 | 2013-01-20_ | _EPI_ISL_189628_ | _A/Houston/JMM_164/2013_        | _EpiFluDB_       |
| 3059 | 2013-01-20_ | _EPI_ISL_189629_ | _A/Houston/JMM_166/2013_        | _EpiFluDB_       |
| 3060 | 2013-01-21_ | _EPI_ISL_189635_ | _A/Houston/JMM_172/2013_        | _EpiFluDB_       |
| 3061 | 2013-01-22_ | _EPI_ISL_145939_ | _A/Singapore/H2013.060/2013_    | _EpiFluDB_       |
| 3062 | 2013-01-22_ | _EPI_ISL_148044_ | _A/Boston/DOA2-213/2013_        | _EpiFluDB_       |
| 3063 | 2013-01-22_ | _EPI_ISL_148055_ | _A/Boston/DOA2-225/2013_        | _EpiFluDB_       |
| 3064 | 2013-01-22_ | _EPI_ISL_189633_ | _A/Houston/JMM_170/2013_        | _EpiFluDB_       |
| 3065 | 2013-01-22_ | _EPI_ISL_189617_ | _A/Houston/JMM_153/2013_        | _EpiFluDB_       |
| 3066 | 2013-01-22_ | _EPI_ISL_189618_ | _A/Houston/JMM_154/2013_        | _EpiFluDB_       |
| 3067 | 2013-01-22_ | _EPI_ISL_189646_ | _A/Houston/JMM_149/2013_        | _EpiFluDB_       |
| 3068 | 2013-01-23_ | _EPI_ISL_148035_ | _A/Boston/DOA2-196/2013_        | _EpiFluDB_       |
| 3069 | 2013-01-23_ | _EPI_ISL_148051_ | _A/Boston/DOA2-221/2013_        | _EpiFluDB_       |
| 3070 | 2013-01-23_ | _EPI_ISL_189625_ | _A/Houston/JMM_161/2013_        | _EpiFluDB_       |
| 3071 | 2013-01-25_ | _EPI_ISL_148072_ | _A/Boston/DOA2-245/2013_        | _EpiFluDB_       |
| 3072 | 2013-01-25_ | _EPI_ISL_189647_ | _A/Houston/JMM_150/2013_        | _EpiFluDB_       |
| 3073 | 2013-01-26_ | _EPI_ISL_148073_ | _A/Boston/DOA2-246/2013_        | _EpiFluDB_       |
| 3074 | 2013-01-26_ | _EPI_ISL_189620_ | _A/Houston/JMM_156/2013_        | _EpiFluDB_       |
| 3075 | 2013-01-26_ | _EPI_ISL_189643_ | _A/Houston/JMM_151/2013_        | _EpiFluDB_       |
| 3076 | 2013-01-26_ | _EPI_ISL_202161_ | _A/Connecticut/Flu166/2013_     | _EpiFluDB_       |
| 3077 | 2013-01-27_ | _EPI_ISL_156805_ | _A/Almaty/2958/2013_            | _Garten_Rebecca_ |
| 3078 | 2013-01-27_ | _EPI_ISL_189626_ | _A/Houston/JMM_162/2013_        | _EpiFluDB_       |
| 3079 | 2013-01-28_ | _EPI_ISL_148071_ | _A/Boston/DOA2-244/2013_        | _EpiFluDB_       |
| 3080 | 2013-01-28_ | _EPI_ISL_205364_ | _A/Thailand/CU-87536/2013_      | _EpiFluDB_       |
| 3081 | 2013-01-29_ | _EPI_ISL_156391_ | _A/Hangzhou/B48/2013_           | _Li_Jun_         |
| 3082 | 2013-01-30_ | _EPI_ISL_189632_ | _A/Houston/JMM_169/2013_        | _EpiFluDB_       |
| 3083 | 2013-01-30_ | _EPI_ISL_189621_ | _A/Houston/JMM_157/2013_        | _EpiFluDB_       |
| 3084 | 2013-02-01_ | _EPI_ISL_189622_ | _A/Houston/JMM_158/2013_        | _EpiFluDB_       |
| 3085 | 2013-02-02_ | _EPI_ISL_205365_ | _A/Thailand/CU-87585/2013_      | _EpiFluDB_       |
| 3086 | 2013-02-05_ | _EPI_ISL_189641_ | _A/Houston/JMM_179/2013_        | _EpiFluDB_       |
| 3087 | 2013-02-07_ | _EPI_ISL_160536_ | _A/Boston/YGA_01207/2013_       | _EpiFluDB_       |
| 3088 | 2013-02-08_ | _EPI_ISL_189642_ | _A/Houston/JMM_180/2013_        | _EpiFluDB_       |
| 3089 | 2013-02-11_ | _EPI_ISL_189149_ | _A/Nicaragua/AGA2-112/2013_     | _EpiFluDB_       |
| 3090 | 2013-02-17_ | _EPI_ISL_156392_ | _A/Hangzhou/A121/2013_          | _Li_Jun_         |
| 3091 | 2013-02-17_ | _EPI_ISL_189150_ | _A/Nicaragua/AGA2-113/2013_     | _EpiFluDB_       |
| 3092 | 2013-02-19_ | _EPI_ISL_156393_ | _A/Hangzhou/A126/2013_          | _Li_Jun_         |
| 3093 | 2013-02-20_ | _EPI_ISL_140276_ | _A/Alaska/02/2013_              | _Garten_Rebecca_ |
| 3094 | 2013-02-20_ | _EPI_ISL_139924_ | _A/Alaska/02/2013_              | _Garten_Rebecca_ |
| 3095 | 2013-02-21_ | _EPI_ISL_189151_ | _A/Nicaragua/AGA2-114/2013_     | _EpiFluDB_       |
| 3096 | 2013-02-22_ | _EPI_ISL_145508_ | _A/American_Samoa/4786/2013_    | _Garten_Rebecca_ |
| 3097 | 2013-02-22_ | _EPI_ISL_145683_ | _A/American_Samoa/4786/2013_    | _Garten_Rebecca_ |
| 3098 | 2013-02-25_ | _EPI_ISL_156394_ | _A/Hangzhou/A155/2013_          | _Li_Jun_         |
| 3099 | 2013-02-27_ | _EPI_ISL_148747_ | _A/SRI_LANKA/27/2013_           | _Komadina_Naomi_ |
| 3100 | 2013-03-01_ | _EPI_ISL_156395_ | _A/Hangzhou/A158/2013_          | _Li_Jun_         |
| 3101 | 2013-03-04_ | _EPI_ISL_148749_ | _A/SYDNEY/506/2013_             | _Komadina_Naomi_ |
| 3102 | 2013-03-06_ | _EPI_ISL_145503_ | _A/Maryland/04/2013_            | _Garten_Rebecca_ |
| 3103 | 2013-03-18_ | _EPI_ISL_205366_ | _A/Thailand/CU-87765/2013_      | _EpiFluDB_       |
| 3104 | 2013-04-04_ | _EPI_ISL_153076_ | _A/Suzhou/1275/2013_            | _EpiFluDB_       |
| 3105 | 2013-04-06_ | _EPI_ISL_145506_ | _A/Ukraine/387/2013_            | _Garten_Rebecca_ |
| 3106 | 2013-04-13_ | _EPI_ISL_173301_ | _A/Vietnam/13V_H3-4/2013_       | _Hiroki_Kondo_   |
| 3107 | 2013-04-22_ | _EPI_ISL_205373_ | _A/Thailand/CU-87885/2013_      | _EpiFluDB_       |
| 3108 | 2013-04-26_ | _EPI_ISL_141600_ | _A/Nanjing/M1/2013_             | _Cui_Lunbiao_    |
| 3109 | 2013-05-07_ | _EPI_ISL_149693_ | _A/Bangladesh/9334/2013_        | _Garten_Rebecca_ |
| 3110 | 2013-05-12_ | _EPI_ISL_151804_ | _A/Bangladesh/9269/2013_        | _Garten_Rebecca_ |
| 3111 | 2013-05-22_ | _EPI_ISL_145500_ | _A/Brazil/0328/2013_            | _Garten_Rebecca_ |
| 3112 | 2013-06-04_ | _EPI_ISL_205367_ | _A/Thailand/CU-A114/2013_       | _EpiFluDB_       |
| 3113 | 2013-06-14_ | _EPI_ISL_174257_ | _A/Nicaragua/30071_01_TR1/2013_ | _EpiFluDB_       |
| 3114 | 2013-06-14_ | _EPI_ISL_174259_ | _A/Nicaragua/30072_01_TR1/2013_ | _EpiFluDB_       |
| 3115 | 2013-06-16_ | _EPI_ISL_152924_ | _A/Victoria/506/2013_           | _Garten_Rebecca_ |
| 3116 | 2013-06-17_ | _EPI_ISL_145684_ | _A/Victoria/505/2013_           | _Garten_Rebecca_ |
| 3117 | 2013-06-20_ | _EPI_ISL_205368_ | _A/Thailand/CU-A134/2013_       | _EpiFluDB_       |
| 3118 | 2013-06-27_ | _EPI_ISL_172194_ | _A/Myanmar/13M002/2013_         | _Hiroki_Kondo_   |
| 3119 | 2013-07-02_ | _EPI_ISL_172195_ | _A/Myanmar/13M004/2013_         | _Hiroki_Kondo_   |
| 3120 | 2013-07-02_ | _EPI_ISL_174234_ | _A/Nicaragua/5892_01_TR1/2013_  | _EpiFluDB_       |
| 3121 | 2013-07-05_ | _EPI_ISL_145498_ | _A/Utah/07/2013_                | _Garten_Rebecca_ |
| 3122 | 2013-07-05_ | _EPI_ISL_151022_ | _A/Utah/07/2013_                | _Garten_Rebecca_ |
| 3123 | 2013-07-05_ | _EPI_ISL_152925_ | _A/Utah/07/2013_                | _Garten_Rebecca_ |
| 3124 | 2013-07-05_ | _EPI_ISL_174235_ | _A/Nicaragua/30143_01_tr3/2013_ | _EpiFluDB_       |
| 3125 | 2013-07-05_ | _EPI_ISL_174236_ | _A/Nicaragua/7545_01_TR3/2013_  | _EpiFluDB_       |
| 3126 | 2013-07-05_ | _EPI_ISL_174237_ | _A/Nicaragua/30185_01_TR1/2013_ | _EpiFluDB_       |
| 3127 | 2013-07-08_ | _EPI_ISL_156396_ | _A/Hangzhou/A429/2013_          | _Li_Jun_         |
| 3128 | 2013-07-08_ | _EPI_ISL_174238_ | _A/Nicaragua/30190_01_TR1/2013_ | _EpiFluDB_       |
| 3129 | 2013-07-08_ | _EPI_ISL_174239_ | _A/Nicaragua/30193_01_TR1/2013_ | _EpiFluDB_       |
| 3130 | 2013-07-08_ | _EPI_ISL_174240_ | _A/Nicaragua/6019_01_TR1/2013_  | _EpiFluDB_       |
| 3131 | 2013-07-09_ | _EPI_ISL_172836_ | _A/Myanmar/13M011/2013_         | _Hiroki_Kondo_   |
| 3132 | 2013-07-09_ | _EPI_ISL_174241_ | _A/Nicaragua/30208_01_tr1/2013_ | _EpiFluDB_       |
| 3133 | 2013-07-09_ | _EPI_ISL_174242_ | _A/Nicaragua/3026_01_TR1/2013_  | _EpiFluDB_       |
| 3134 | 2013-07-09_ | _EPI_ISL_174251_ | _A/Nicaragua/7457_02/2013_      | _EpiFluDB_       |
| 3135 | 2013-07-10_ | _EPI_ISL_149685_ | _A/Massachusetts/11/2013_       | _Garten_Rebecca_ |
| 3136 | 2013-07-10_ | _EPI_ISL_151025_ | _A/Massachusetts/11/2013_       | _Garten_Rebecca_ |
| 3137 | 2013-07-10_ | _EPI_ISL_151794_ | _A/Massachusetts/11/2013_       | _Garten_Rebecca_ |
| 3138 | 2013-07-10_ | _EPI_ISL_174243_ | _A/Nicaragua/5465_01_TR3/2013_  | _EpiFluDB_       |
| 3139 | 2013-07-10_ | _EPI_ISL_174245_ | _A/Nicaragua/30184_01_TR2/2013_ | _EpiFluDB_       |
| 3140 | 2013-07-10_ | _EPI_ISL_205369_ | _A/Thailand/CU-A166/2013_       | _EpiFluDB_       |
| 3141 | 2013-07-11_ | _EPI_ISL_172631_ | _A/Myanmar/13M016/2013_         | _Hiroki_Kondo_   |
| 3142 | 2013-07-11_ | _EPI_ISL_172837_ | _A/Myanmar/13M020/2013_         | _Hiroki_Kondo_   |

|                                    |                  |                                |                  |
|------------------------------------|------------------|--------------------------------|------------------|
| 3143 2013-07-14_                   | _EPI_ISL_149692_ | _A/Georgia/03/2013_            | _Garten_Rebecca_ |
| 3144 2013-07-14_                   | _EPI_ISL_174249_ | _A/Nicaragua/6777_01_TR1/2013_ | _EpiFluDB_       |
| 3145 2013-07-15_                   | _EPI_ISL_172632_ | _A/Myanmar/13M029/2013_        | _Hiroki_Kondo_   |
| 3146 2013-07-15_                   | _EPI_ISL_172838_ | _A/Myanmar/13M035/2013_        | _Hiroki_Kondo_   |
| 3147 2013-07-15_                   | _EPI_ISL_172988_ | _A/Myanmar/13M044/2013_        | _Hiroki_Kondo_   |
| 3148 2013-07-15_                   | _EPI_ISL_174250_ | _A/Nicaragua/7693_01_TR3/2013_ | _EpiFluDB_       |
| 3149 2013-07-16_                   | _EPI_ISL_172633_ | _A/Myanmar/13M056/2013_        | _Hiroki_Kondo_   |
| 3150 2013-07-16_                   | _EPI_ISL_172989_ | _A/Myanmar/13M061/2013_        | _Hiroki_Kondo_   |
| 3151 2013-07-16_                   | _EPI_ISL_173051_ | _A/Myanmar/13M124/2013_        | _Hiroki_Kondo_   |
| 3152 2013-07-17_                   | _EPI_ISL_172990_ | _A/Myanmar/13M062/2013_        | _Hiroki_Kondo_   |
| 3153 2013-07-17_                   | _EPI_ISL_173011_ | _A/Myanmar/13M070/2013_        | _Hiroki_Kondo_   |
| 3154 2013-07-18_                   | _EPI_ISL_205370_ | _A/Thailand/CU-A182/2013_      | _EpiFluDB_       |
| 3155 2013-07-19_                   | _EPI_ISL_172634_ | _A/Myanmar/13M082/2013_        | _Hiroki_Kondo_   |
| 3156 2013-07-19_                   | _EPI_ISL_173012_ | _A/Myanmar/13M076/2013_        | _Hiroki_Kondo_   |
| 3157 2013-07-19_                   | _EPI_ISL_173013_ | _A/Myanmar/13M084/2013_        | _Hiroki_Kondo_   |
| 3158 2013-07-22_                   | _EPI_ISL_173014_ | _A/Myanmar/13M085/2013_        | _Hiroki_Kondo_   |
| 3159 2013-07-22_                   | _EPI_ISL_173034_ | _A/Myanmar/13M087/2013_        | _Hiroki_Kondo_   |
| 3160 2013-07-22_                   | _EPI_ISL_173035_ | _A/Myanmar/13M088/2013_        | _Hiroki_Kondo_   |
| 3161 2013-07-22_                   | _EPI_ISL_173045_ | _A/Myanmar/13M089/2013_        | _Hiroki_Kondo_   |
| 3162 2013-07-23_                   | _EPI_ISL_149689_ | _A/Costa_Rica/4009/2013_       | _Garten_Rebecca_ |
| 3163 2013-07-23_                   | _EPI_ISL_149691_ | _A/Costa_Rica/4009/2013_       | _Garten_Rebecca_ |
| 3164 2013-07-24_                   | _EPI_ISL_173046_ | _A/Myanmar/13M098/2013_        | _Hiroki_Kondo_   |
| 3165 2013-07-24_                   | _EPI_ISL_173047_ | _A/Myanmar/13M102/2013_        | _Hiroki_Kondo_   |
| 3166 2013-07-25_                   | _EPI_ISL_173048_ | _A/Myanmar/13M105/2013_        | _Hiroki_Kondo_   |
| 3167 2013-07-25_                   | _EPI_ISL_173049_ | _A/Myanmar/13M109/2013_        | _Hiroki_Kondo_   |
| 3168 2013-07-26_                   | _EPI_ISL_150049_ | _A/Costa_Rica/4700/2013_       | _Garten_Rebecca_ |
| 3169 2013-07-26_                   | _EPI_ISL_150050_ | _A/Costa_Rica/4700/2013_       | _Garten_Rebecca_ |
| 3170 2013-07-26_                   | _EPI_ISL_151795_ | _A/Costa_Rica/4700/2013_       | _Garten_Rebecca_ |
| 3171 2013-07-26_                   | _EPI_ISL_158724_ | _A/Costa_Rica/4700/2013_       | _Garten_Rebecca_ |
| 3172 2013-07-26_                   | _EPI_ISL_173050_ | _A/Myanmar/13M118/2013_        | _Hiroki_Kondo_   |
| 3173 2013-07-29_                   | _EPI_ISL_156397_ | _A/Hangzhou/A469/2013_         | _Li_Jun_         |
| 3174 2013-08-02_                   | _EPI_ISL_205375_ | _A/Thailand/CU-88121/2013_     | _EpiFluDB_       |
| 3175 2013-08-05_                   | _EPI_ISL_205376_ | _A/Thailand/CU-88127/2013_     | _EpiFluDB_       |
| 3176 2013-08-15_                   | _EPI_ISL_149680_ | _A/Arkansas/13/2013_           | _Garten_Rebecca_ |
| 3177 2013-08-15_                   | _EPI_ISL_156398_ | _A/Hangzhou/A511/2013_         | _Li_Jun_         |
| 3178 2013-08-22_                   | _EPI_ISL_173052_ | _A/Myanmar/13M300/2013_        | _Hiroki_Kondo_   |
| 3179 2013-08-27_                   | _EPI_ISL_156399_ | _A/Hangzhou/A544/2013_         | _Li_Jun_         |
| 3180 2013-08-29_                   | _EPI_ISL_205371_ | _A/Thailand/CU-A305/2013_      | _EpiFluDB_       |
| 3181 2013-09-04_                   | _EPI_ISL_205381_ | _A/Thailand/CU-C4087/2013_     | _EpiFluDB_       |
| 3182 2013-09-09_                   | _EPI_ISL_161893_ | _A/BRISBANE/165/2013_          | _Komadina_Naomi_ |
| 3183 2013-09-15_                   | _EPI_ISL_156400_ | _A/Hangzhou/A601/2013_         | _Li_Jun_         |
| 3184 2013-09-18_                   | _EPI_ISL_161319_ | _A/NORTH_WEST_AUCKLAND/6/2013_ | _Komadina_Naomi_ |
| 3185 2013-09-23_                   | _EPI_ISL_205377_ | _A/Thailand/CU-88364/2013_     | _EpiFluDB_       |
| 3186 2013-09-25_                   | _EPI_ISL_173306_ | _A/Vietnam/13_V_H3-8/2013_     | _Hiroki_Kondo_   |
| 3187 2013-10-01_                   | _EPI_ISL_159598_ | _A/Iowa/04/2013_               | _Garten_Rebecca_ |
| 3188 2013-10-02_                   | _EPI_ISL_205378_ | _A/Thailand/CU-88518/2013_     | _EpiFluDB_       |
| 3189 2013-10-10_                   | _EPI_ISL_156401_ | _A/Hangzhou/A649/2013_         | _Li_Jun_         |
| 3190 2013-10-10_                   | _EPI_ISL_156402_ | _A/Hangzhou/A662/2013_         | _Li_Jun_         |
| 3191 2013-10-10_                   | _EPI_ISL_156403_ | _A/Hangzhou/A666/2013_         | _Li_Jun_         |
| 3192 2013-10-10_                   | _EPI_ISL_205383_ | _A/Thailand/CU-H3567/2013_     | _EpiFluDB_       |
| 3193 2013-10-12_                   | _EPI_ISL_153537_ | _A/Hong_Kong/5643/2013_        | _Garten_Rebecca_ |
| 3194 2013-10-15_                   | _EPI_ISL_156404_ | _A/Hangzhou/A683/2013_         | _Li_Jun_         |
| 3195 2013-10-15_                   | _EPI_ISL_156405_ | _A/Hangzhou/B599/2013_         | _Li_Jun_         |
| 3196 2013-10-15_                   | _EPI_ISL_156406_ | _A/Hangzhou/B600/2013_         | _Li_Jun_         |
| 3197 2013-10-16_                   | _EPI_ISL_161304_ | _A/PERTH/258/2013_             | _Komadina_Naomi_ |
| 3198 2013-10-18_                   | _EPI_ISL_156407_ | _A/Hangzhou/A691/2013_         | _Li_Jun_         |
| 3199 2013-10-22_                   | _EPI_ISL_156408_ | _A/Hangzhou/A698/2013_         | _Li_Jun_         |
| 3200 2013-10-29_                   | _EPI_ISL_205372_ | _A/Thailand/CU-A459/2013_      | _EpiFluDB_       |
| 3201 2013-11-05_                   | _EPI_ISL_161899_ | _A/CHIANG_RAI/337/2013_        | _Komadina_Naomi_ |
| 3202 2013-11-09_                   | _EPI_ISL_153536_ | _A/Pennsylvania/12/2013_       | _Garten_Rebecca_ |
| 3203 2013-11-13_                   | _EPI_ISL_161895_ | _A/MALAYSIA/10/2013_           | _Komadina_Naomi_ |
| 3204 2013-11-14_                   | _EPI_ISL_205379_ | _A/Thailand/CU-88736/2013_     | _EpiFluDB_       |
| 3205 2013-11-15_                   | _EPI_ISL_156409_ | _A/Hangzhou/A765/2013_         | _Li_Jun_         |
| 3206 2013-11-15_                   | _EPI_ISL_156410_ | _A/Hangzhou/A773/2013_         | _Li_Jun_         |
| 3207 2013-11-15_                   | _EPI_ISL_156411_ | _A/Hangzhou/B690/2013_         | _Li_Jun_         |
| 3208 2013-11-18_                   | _EPI_ISL_156412_ | _A/Hangzhou/A776/2013_         | _Li_Jun_         |
| 3209 2013-11-18_                   | _EPI_ISL_156413_ | _A/Hangzhou/A779/2013_         | _Li_Jun_         |
| 3210 2013-11-18_                   | _EPI_ISL_161902_ | _A/SONG_KHLA/3076/2013_        | _Komadina_Naomi_ |
| 3211 2013-11-21_                   | _EPI_ISL_156414_ | _A/Hangzhou/A784/2013_         | _Li_Jun_         |
| 3212 2013-11-21_                   | _EPI_ISL_156415_ | _A/Hangzhou/A789/2013_         | _Li_Jun_         |
| 3213 2013-11-21_                   | _EPI_ISL_156416_ | _A/Hangzhou/B709/2013_         | _Li_Jun_         |
| 3214 2013-11-21_                   | _EPI_ISL_161897_ | _A/SYDNEY/83/2013_             | _Komadina_Naomi_ |
| 3215 2013-11-25_                   | _EPI_ISL_156417_ | _A/Hangzhou/A796/2013_         | _Li_Jun_         |
| 3216 2013-11-25_                   | _EPI_ISL_156418_ | _A/Hangzhou/A800/2013_         | _Li_Jun_         |
| 3217 2013-11-25_                   | _EPI_ISL_156419_ | _A/Hangzhou/B718/2013_         | _Li_Jun_         |
| 3218 2013-11-25_                   | _EPI_ISL_156420_ | _A/Hangzhou/B721/2013_         | _Li_Jun_         |
| 3219 2013-11-27_                   | _EPI_ISL_156421_ | _A/Hangzhou/A803/2013_         | _Li_Jun_         |
| 3220 2013-11-27_                   | _EPI_ISL_156422_ | _A/Hangzhou/A806/2013_         | _Li_Jun_         |
| 3221 2013-11-27_                   | _EPI_ISL_156423_ | _A/Hangzhou/B728/2013_         | _Li_Jun_         |
| 3222 2013-11-27_                   | _EPI_ISL_156424_ | _A/Hangzhou/B735/2013_         | _Li_Jun_         |
| 3223 2013-11-29_                   | _EPI_ISL_155048_ | _A/Washington/18/2013_         | _Garten_Rebecca_ |
| 3224 2013-11-29_                   | _EPI_ISL_155049_ | _A/Washington/18/2013_         | _Garten_Rebecca_ |
| 3225 2013-11-29_                   | _EPI_ISL_166309_ | _A/Washington/18/2013_         | _Garten_Rebecca_ |
| 3226 2013-12-04_                   | _EPI_ISL_156425_ | _A/Hangzhou/A812/2013_         | _Li_Jun_         |
| 3227 2013-12-04_                   | _EPI_ISL_156426_ | _A/Hangzhou/A816/2013_         | _Li_Jun_         |
| 3228 2013-12-04_                   | _EPI_ISL_156427_ | _A/Hangzhou/A825/2013_         | _Li_Jun_         |
| 3229 2013-12-06_                   | _EPI_ISL_165829_ | _A/Switzerland/9715293/2013_   | _Garten_Rebecca_ |
| 3230 2013-12-06_                   | _EPI_ISL_189815_ | _A/Switzerland/9715293/2013_   | _Garten_Rebecca_ |
| 3231 2013-12-11_                   | _EPI_ISL_169430_ | _A/Singapore/OHC005/2013_      | _Poh_Mee_Kian_   |
| 3232 2013-12-11_                   | _EPI_ISL_169431_ | _A/Singapore/OHC008/2013_      | _Poh_Mee_Kian_   |
| 3233 2013-12-11_                   | _EPI_ISL_205380_ | _A/Thailand/CU-88772/2013_     | _EpiFluDB_       |
| 3234 2013-12-12_                   | _EPI_ISL_169432_ | _A/Singapore/OHC010/2013_      | _Poh_Mee_Kian_   |
| 3235 2013-12-12_                   | _EPI_ISL_169437_ | _A/Singapore/OHC009/2013_      | _Poh_Mee_Kian_   |
| 3236 2013-12-12_                   | _EPI_ISL_169438_ | _A/Singapore/TT938/2013_       | _Poh_Mee_Kian_   |
| 3237 2013-12-13_                   | _EPI_ISL_169433_ | _A/Singapore/OHC015/2013_      | _Poh_Mee_Kian_   |
| 3238 2013-12-13_                   | _EPI_ISL_169434_ | _A/Singapore/OHC016/2013_      | _Poh_Mee_Kian_   |
| 3239 2013-12-13_                   | _EPI_ISL_169435_ | _A/Singapore/OHC019/2013_      | _Poh_Mee_Kian_   |
| 3240 2013-12-13_                   | _EPI_ISL_169436_ | _A/Singapore/OHC022/2013_      | _Poh_Mee_Kian_   |
| 3241 2013-12-16_                   | _EPI_ISL_169439_ | _A/Singapore/TT973/2013_       | _Poh_Mee_Kian_   |
| 3242 2013-12-18_                   | _EPI_ISL_205382_ | _A/Thailand/CU-C4364/2013_     | _EpiFluDB_       |
| 3243 2013-12-19_                   | _EPI_ISL_169441_ | _A/Singapore/TT979/2013_       | _Poh_Mee_Kian_   |
| 3244 2013-12-21_                   | _EPI_ISL_155657_ | _A/Stockholm/40/2013_          | _Brytting_Maria_ |
| 3245 2013-12-27_                   | _EPI_ISL_164400_ | _A/Montana/27/2013_            | _Garten_Rebecca_ |
| 3246 2013-12-29_                   | _EPI_ISL_164406_ | _A/Louisiana/39/2013_          | _Garten_Rebecca_ |
| 3247 2013-12-30_                   | _EPI_ISL_169440_ | _A/Singapore/CGH021/2013_      | _Poh_Mee_Kian_   |
| 3248 2014_(Month_and_day_unknown)_ | _EPI_ISL_167955_ | _A/Finland/440/2014_           | _Garten_Rebecca_ |
| 3249 2014_(Month_and_day_unknown)_ | _EPI_ISL_169460_ | _A/Florida/41/2014_            | _Garten_Rebecca_ |
| 3250 2014_(Month_and_day_unknown)_ | _EPI_ISL_176512_ | _A/Hong_Kong/4801/2014_        | _Garten_Rebecca_ |
| 3251 2014_(Month_and_day_unknown)_ | _EPI_ISL_176514_ | _A/Hong_Kong/7127/2014_        | _Garten_Rebecca_ |
| 3252 2014_(Month_and_day_unknown)_ | _EPI_ISL_176570_ | _A/Uganda/4530/2014_           | _Garten_Rebecca_ |
| 3253 2014_(Month_and_day_unknown)_ | _EPI_ISL_188896_ | _A/Georgia/27/2014_            | _Garten_Rebecca_ |
| 3254 2014_(Month_and_day_unknown)_ | _EPI_ISL_189813_ | _A/Hong_Kong/7127/2014_        | _Garten_Rebecca_ |
| 3255 2014_(Month_and_day_unknown)_ | _EPI_ISL_189814_ | _A/Hong_Kong/4801/2014_        | _Garten_Rebecca_ |
| 3256 2014_(Month_and_day_unknown)_ | _EPI_ISL_205285_ | _A/Norway/2178/2014_           | _Garten_Rebecca_ |
| 3257 2014-01-02_                   | _EPI_ISL_155658_ | _A/Stockholm/2/2014_           | _Brytting_Maria_ |
| 3258 2014-01-02_                   | _EPI_ISL_188843_ | _A/England/50220066/2014_      | _Gallano_Monica_ |
| 3259 2014-01-07_                   | _EPI_ISL_205384_ | _A/Thailand/CU-88849/2014_     | _EpiFluDB_       |
| 3260 2014-01-07_                   | _EPI_ISL_205390_ | _A/Thailand/CU-C4406/2014_     | _EpiFluDB_       |
| 3261 2014-01-09_                   | _EPI_ISL_176847_ | _A/Lebanon/14L41/2014_         | _Hiroki_Kondo_   |
| 3262 2014-01-12_                   | _EPI_ISL_159512_ | _A/Maryland/03/2014_           | _Garten_Rebecca_ |
| 3263 2014-01-16_                   | _EPI_ISL_164402_ | _A/California/02/2014_         | _Garten_Rebecca_ |

|      |            |                  |                                  |                                |
|------|------------|------------------|----------------------------------|--------------------------------|
| 3264 | 2014-01-20 | _EPI_ISL_166793_ | _A/Rio_Grande_do_Sul/23/2014_    | _Silva_Paola_Cristina_Resende_ |
| 3265 | 2014-01-20 | _EPI_ISL_166794_ | _A/Rio_Grande_do_Sul/23/2014_    | _Silva_Paola_Cristina_Resende_ |
| 3266 | 2014-01-21 | _EPI_ISL_164420_ | _A/New_York/05/2014_             | _Garten_Rebecca_               |
| 3267 | 2014-01-21 | _EPI_ISL_164794_ | _A/New_York/05/2014_             | _Garten_Rebecca_               |
| 3268 | 2014-01-22 | _EPI_ISL_176848_ | _A/Lebanon/14L45/2014_           | _Hiroki_Kondo_                 |
| 3269 | 2014-01-31 | _EPI_ISL_176849_ | _A/Lebanon/14L56/2014_           | _Hiroki_Kondo_                 |
| 3270 | 2014-02-01 | _EPI_ISL_156993_ | _A/Stockholm/4/2014_             | _Brytting_Maria_               |
| 3271 | 2014-02-04 | _EPI_ISL_205393_ | _A/Thailand/CU-H3595/2014_       | _EpiFluDB_                     |
| 3272 | 2014-02-06 | _EPI_ISL_157000_ | _A/Gavle/1/2014_                 | _Brytting_Maria_               |
| 3273 | 2014-02-06 | _EPI_ISL_158889_ | _A/Stockholm/5/2014_             | _Brytting_Maria_               |
| 3274 | 2014-02-06 | _EPI_ISL_158890_ | _A/Stockholm/6/2014_             | _Brytting_Maria_               |
| 3275 | 2014-02-06 | _EPI_ISL_166707_ | _A/Stockholm/06/2014_            | _Garten_Rebecca_               |
| 3276 | 2014-02-06 | _EPI_ISL_166996_ | _A/Stockholm/06/2014_            | _Garten_Rebecca_               |
| 3277 | 2014-02-10 | _EPI_ISL_176850_ | _A/Lebanon/14L78/2014_           | _Hiroki_Kondo_                 |
| 3278 | 2014-02-12 | _EPI_ISL_157002_ | _A/Sweden/1/2014_                | _Brytting_Maria_               |
| 3279 | 2014-02-12 | _EPI_ISL_167934_ | _A/Mexico/711/2014_              | _Garten_Rebecca_               |
| 3280 | 2014-02-12 | _EPI_ISL_205391_ | _A/Thailand/CU-C4546/2014_       | _EpiFluDB_                     |
| 3281 | 2014-02-17 | _EPI_ISL_168114_ | _A/Brazil/9879/2014_             | _Garten_Rebecca_               |
| 3282 | 2014-02-19 | _EPI_ISL_168112_ | _A/Brazil/0769/2014_             | _Garten_Rebecca_               |
| 3283 | 2014-02-20 | _EPI_ISL_170992_ | _A/Nagasaki/13N053/2014_         | _Hiroki_Kondo_                 |
| 3284 | 2014-02-21 | _EPI_ISL_159401_ | _A/Stockholm/13/2014_            | _Brytting_Maria_               |
| 3285 | 2014-02-26 | _EPI_ISL_198222_ | _A/Hong_Kong/4801/2014_          | _Garten_Rebecca_               |
| 3286 | 2014-03-03 | _EPI_ISL_168123_ | _A/Brazil/6069/2014_             | _Garten_Rebecca_               |
| 3287 | 2014-03-03 | _EPI_ISL_171976_ | _A/Nagasaki/13N063/2014_         | _Hiroki_Kondo_                 |
| 3288 | 2014-03-07 | _EPI_ISL_205394_ | _A/Thailand/CU-H3626/2014_       | _EpiFluDB_                     |
| 3289 | 2014-03-11 | _EPI_ISL_164399_ | _A/Nebraska/04/2014_             | _Garten_Rebecca_               |
| 3290 | 2014-03-11 | _EPI_ISL_164403_ | _A/Nebraska/04/2014_             | _Garten_Rebecca_               |
| 3291 | 2014-03-17 | _EPI_ISL_166797_ | _A/Parana/87/2014_               | _Silva_Paola_Cristina_Resende_ |
| 3292 | 2014-03-26 | _EPI_ISL_164404_ | _A/Palau/6759/2014_              | _Garten_Rebecca_               |
| 3293 | 2014-03-26 | _EPI_ISL_167865_ | _A/Palau/6775/2014_              | _Garten_Rebecca_               |
| 3294 | 2014-03-26 | _EPI_ISL_169185_ | _A/Palau/6759/2014_              | _Garten_Rebecca_               |
| 3295 | 2014-03-29 | _EPI_ISL_173112_ | _A/Nagasaki/13N100/2014_         | _Hiroki_Kondo_                 |
| 3296 | 2014-04-01 | _EPI_ISL_205392_ | _A/Thailand/CU-CB166/2014_       | _EpiFluDB_                     |
| 3297 | 2014-04-07 | _EPI_ISL_162466_ | _A/Stockholm/15/2014_            | _Brytting_Maria_               |
| 3298 | 2014-04-15 | _EPI_ISL_166997_ | _A/North_Carolina/13/2014_       | _Garten_Rebecca_               |
| 3299 | 2014-04-17 | _EPI_ISL_177536_ | _A/Uganda/583/2014_              | _Garten_Rebecca_               |
| 3300 | 2014-04-21 | _EPI_ISL_178221_ | _A/New_Zealand/316/2014_         | _Deng_Yi-Mo_                   |
| 3301 | 2014-04-22 | _EPI_ISL_192157_ | _A/Nigeria/942/2014_             | _Garten_Rebecca_               |
| 3302 | 2014-04-30 | _EPI_ISL_168694_ | _A/Hong_Kong/5738/2014_          | _Garten_Rebecca_               |
| 3303 | 2014-05-01 | _EPI_ISL_169510_ | _A/Maryland/19/2014_             | _Garten_Rebecca_               |
| 3304 | 2014-05-02 | _EPI_ISL_169489_ | _A/Maryland/18/2014_             | _Garten_Rebecca_               |
| 3305 | 2014-05-07 | _EPI_ISL_168119_ | _A/Brazil/2035/2014_             | _Garten_Rebecca_               |
| 3306 | 2014-05-14 | _EPI_ISL_192190_ | _A/Nigeria/928/2014_             | _Garten_Rebecca_               |
| 3307 | 2014-05-22 | _EPI_ISL_167922_ | _A/Dominican_Republic/8490/2014_ | _Garten_Rebecca_               |
| 3308 | 2014-05-26 | _EPI_ISL_177540_ | _A/Uganda/1590/2014_             | _Garten_Rebecca_               |
| 3309 | 2014-05-28 | _EPI_ISL_167921_ | _A/Dominican_Republic/8483/2014_ | _Garten_Rebecca_               |
| 3310 | 2014-06-02 | _EPI_ISL_166307_ | _A/Alaska/18/2014_               | _Garten_Rebecca_               |
| 3311 | 2014-06-02 | _EPI_ISL_192189_ | _A/Nigeria/71/2014_              | _Garten_Rebecca_               |
| 3312 | 2014-06-07 | _EPI_ISL_168128_ | _A/Brazil/4146/2014_             | _Garten_Rebecca_               |
| 3313 | 2014-06-09 | _EPI_ISL_168105_ | _A/Bangladesh/10009/2014_        | _Garten_Rebecca_               |
| 3314 | 2014-06-10 | _EPI_ISL_168722_ | _A/Texas/34/2014_                | _Garten_Rebecca_               |
| 3315 | 2014-06-10 | _EPI_ISL_192158_ | _A/Nigeria/120/2014_             | _Garten_Rebecca_               |
| 3316 | 2014-06-16 | _EPI_ISL_167944_ | _A/Newcastle/22/2014_            | _Garten_Rebecca_               |
| 3317 | 2014-06-16 | _EPI_ISL_205385_ | _A/Thailand/CU-810282/2014_      | _EpiFluDB_                     |
| 3318 | 2014-06-17 | _EPI_ISL_167911_ | _A/Bolivia/667/2014_             | _Garten_Rebecca_               |
| 3319 | 2014-06-18 | _EPI_ISL_167912_ | _A/Bolivia/716/2014_             | _Garten_Rebecca_               |
| 3320 | 2014-06-24 | _EPI_ISL_167913_ | _A/Bolivia/751/2014_             | _Garten_Rebecca_               |
| 3321 | 2014-06-24 | _EPI_ISL_173352_ | _A/Myanmar/14M039/2014_          | _Hiroki_Kondo_                 |
| 3322 | 2014-06-25 | _EPI_ISL_167945_ | _A/Nicaragua/7402/2014_          | _Garten_Rebecca_               |
| 3323 | 2014-06-29 | _EPI_ISL_166890_ | _A/South_Australia/55/2014_      | _Garten_Rebecca_               |
| 3324 | 2014-06-29 | _EPI_ISL_166891_ | _A/South_Australia/55/2014_      | _Garten_Rebecca_               |
| 3325 | 2014-06-29 | _EPI_ISL_189817_ | _A/South_Australia/55/2014_      | _Garten_Rebecca_               |
| 3326 | 2014-07-01 | _EPI_ISL_167909_ | _A/Argentina/11093/2014_         | _Garten_Rebecca_               |
| 3327 | 2014-07-02 | _EPI_ISL_173355_ | _A/Myanmar/14M187/2014_          | _Hiroki_Kondo_                 |
| 3328 | 2014-07-03 | _EPI_ISL_167947_ | _A/Paraguay/0049/2014_           | _Garten_Rebecca_               |
| 3329 | 2014-07-04 | _EPI_ISL_167908_ | _A/Argentina/11071/2014_         | _Garten_Rebecca_               |
| 3330 | 2014-07-04 | _EPI_ISL_172835_ | _A/Myanmar/13M006/2013_          | _Hiroki_Kondo_                 |
| 3331 | 2014-07-06 | _EPI_ISL_168104_ | _A/Brazil/3972/2014_             | _Garten_Rebecca_               |
| 3332 | 2014-07-07 | _EPI_ISL_168120_ | _A/Brazil/623/2014_              | _Garten_Rebecca_               |
| 3333 | 2014-07-08 | _EPI_ISL_173354_ | _A/Myanmar/14M122/2014_          | _Hiroki_Kondo_                 |
| 3334 | 2014-07-09 | _EPI_ISL_167920_ | _A/Costa_Rica/2303/2014_         | _Garten_Rebecca_               |
| 3335 | 2014-07-09 | _EPI_ISL_205386_ | _A/Thailand/CU-810345/2014_      | _EpiFluDB_                     |
| 3336 | 2014-07-09 | _EPI_ISL_205395_ | _A/Thailand/CU-H3649/2014_       | _EpiFluDB_                     |
| 3337 | 2014-07-14 | _EPI_ISL_173353_ | _A/Myanmar/14M059/2014_          | _Hiroki_Kondo_                 |
| 3338 | 2014-07-16 | _EPI_ISL_167948_ | _A/Paraguay/0095/2014_           | _Garten_Rebecca_               |
| 3339 | 2014-07-17 | _EPI_ISL_167910_ | _A/Argentina/11126/2014_         | _Garten_Rebecca_               |
| 3340 | 2014-07-18 | _EPI_ISL_168125_ | _A/Hawaii/44/2014_               | _Garten_Rebecca_               |
| 3341 | 2014-07-18 | _EPI_ISL_168126_ | _A/Hawaii/47/2014_               | _Garten_Rebecca_               |
| 3342 | 2014-07-20 | _EPI_ISL_167395_ | _A/Tak/1845/2014_                | _Garten_Rebecca_               |
| 3343 | 2014-07-20 | _EPI_ISL_168106_ | _A/Hawaii/46/2014_               | _Garten_Rebecca_               |
| 3344 | 2014-07-21 | _EPI_ISL_168121_ | _A/Brazil/367/2014_              | _Garten_Rebecca_               |
| 3345 | 2014-07-23 | _EPI_ISL_166459_ | _A/Stockholm/17/2014_            | _Brytting_Maria_               |
| 3346 | 2014-07-26 | _EPI_ISL_168107_ | _A/Hawaii/45/2014_               | _Garten_Rebecca_               |
| 3347 | 2014-07-29 | _EPI_ISL_173113_ | _A/Nagasaki/13N101/2014_         | _Hiroki_Kondo_                 |
| 3348 | 2014-07-31 | _EPI_ISL_168899_ | _A/CANBERRA/82/2014_             | _Komadina_Naomi_               |
| 3349 | 2014-07-31 | _EPI_ISL_174194_ | _A/Canberra/82/2014_             | _Garten_Rebecca_               |
| 3350 | 2014-08-01 | _EPI_ISL_171388_ | _A/Paraguay/0094/2014_           | _Garten_Rebecca_               |
| 3351 | 2014-08-04 | _EPI_ISL_171348_ | _A/Beijing_Xicheng/13100/2014_   | _Garten_Rebecca_               |
| 3352 | 2014-08-04 | _EPI_ISL_172735_ | _A/Venezuela/07/2014_            | _Garten_Rebecca_               |
| 3353 | 2014-08-04 | _EPI_ISL_173356_ | _A/Myanmar/14M240/2014_          | _Hiroki_Kondo_                 |
| 3354 | 2014-08-04 | _EPI_ISL_205387_ | _A/Thailand/CU-810509/2014_      | _EpiFluDB_                     |
| 3355 | 2014-08-05 | _EPI_ISL_167954_ | _A/Wisconsin/27/2014_            | _Garten_Rebecca_               |
| 3356 | 2014-08-05 | _EPI_ISL_168907_ | _A/NEWCASTLE/54/2014_            | _Komadina_Naomi_               |
| 3357 | 2014-08-05 | _EPI_ISL_176568_ | _A/Cambodia/870/2014_            | _Garten_Rebecca_               |
| 3358 | 2014-08-05 | _EPI_ISL_205388_ | _A/Thailand/CU-810521/2014_      | _EpiFluDB_                     |
| 3359 | 2014-08-06 | _EPI_ISL_171357_ | _A/Laos/768/2014_                | _Garten_Rebecca_               |
| 3360 | 2014-08-08 | _EPI_ISL_167918_ | _A/California/18/2014_           | _Garten_Rebecca_               |
| 3361 | 2014-08-08 | _EPI_ISL_167929_ | _A/Hawaii/36/2014_               | _Garten_Rebecca_               |
| 3362 | 2014-08-08 | _EPI_ISL_169509_ | _A/Hawaii/36/2014_               | _Garten_Rebecca_               |
| 3363 | 2014-08-10 | _EPI_ISL_167928_ | _A/Hawaii/35/2014_               | _Garten_Rebecca_               |
| 3364 | 2014-08-11 | _EPI_ISL_167917_ | _A/California/17/2014_           | _Garten_Rebecca_               |
| 3365 | 2014-08-11 | _EPI_ISL_167931_ | _A/Hawaii/38/2014_               | _Garten_Rebecca_               |
| 3366 | 2014-08-13 | _EPI_ISL_167930_ | _A/Hawaii/37/2014_               | _Garten_Rebecca_               |
| 3367 | 2014-08-13 | _EPI_ISL_167932_ | _A/Hawaii/39/2014_               | _Garten_Rebecca_               |
| 3368 | 2014-08-13 | _EPI_ISL_172232_ | _A/New_Caledonia/71/2014_        | _Garten_Rebecca_               |
| 3369 | 2014-08-14 | _EPI_ISL_167935_ | _A/Michigan/08/2014_             | _Garten_Rebecca_               |
| 3370 | 2014-08-15 | _EPI_ISL_172795_ | _A/Vietnam/594/2014_             | _Garten_Rebecca_               |
| 3371 | 2014-08-16 | _EPI_ISL_166460_ | _A/Stockholm/18/2014_            | _Brytting_Maria_               |
| 3372 | 2014-08-18 | _EPI_ISL_171396_ | _A/Laos/820/2014_                | _Garten_Rebecca_               |
| 3373 | 2014-08-19 | _EPI_ISL_171381_ | _A/Kenya/123/2014_               | _Garten_Rebecca_               |
| 3374 | 2014-08-20 | _EPI_ISL_167951_ | _A/Texas/39/2014_                | _Garten_Rebecca_               |
| 3375 | 2014-08-21 | _EPI_ISL_171376_ | _A/Kenya/125/2014_               | _Garten_Rebecca_               |
| 3376 | 2014-08-22 | _EPI_ISL_173357_ | _A/Myanmar/14M391/2014_          | _Hiroki_Kondo_                 |
| 3377 | 2014-08-24 | _EPI_ISL_192192_ | _A/ENG/507/2014_                 | _Galliano_Monica_              |
| 3378 | 2014-08-25 | _EPI_ISL_167915_ | _A/California/15/2014_           | _Garten_Rebecca_               |
| 3379 | 2014-08-25 | _EPI_ISL_167916_ | _A/California/16/2014_           | _Garten_Rebecca_               |
| 3380 | 2014-08-25 | _EPI_ISL_171358_ | _A/Laos/842/2014_                | _Garten_Rebecca_               |
| 3381 | 2014-08-25 | _EPI_ISL_171394_ | _A/Kenya/122/2014_               | _Garten_Rebecca_               |
| 3382 | 2014-08-25 | _EPI_ISL_176668_ | _A/Victoria/5006/2014_           | _Garten_Rebecca_               |
| 3383 | 2014-08-26 | _EPI_ISL_171360_ | _A/Laos/864/2014_                | _Garten_Rebecca_               |
| 3384 | 2014-08-26 | _EPI_ISL_171364_ | _A/Laos/859/2014_                | _Garten_Rebecca_               |

|      |            |                  |                             |                  |
|------|------------|------------------|-----------------------------|------------------|
| 3385 | 2014-08-26 | _EPI_ISL_171377_ | _A/Kenya/128/2014_          | _Garten_Rebecca_ |
| 3386 | 2014-08-27 | _EPI_ISL_166824_ | _A/Maryland/25/2014_        | _Garten_Rebecca_ |
| 3387 | 2014-08-27 | _EPI_ISL_171359_ | _A/Kenya/126/2014_          | _Garten_Rebecca_ |
| 3388 | 2014-08-27 | _EPI_ISL_171375_ | _A/Kenya/124/2014_          | _Garten_Rebecca_ |
| 3389 | 2014-08-27 | _EPI_ISL_171399_ | _A/Kenya/127/2014_          | _Garten_Rebecca_ |
| 3390 | 2014-08-27 | _EPI_ISL_188746_ | _A/Scotland/2/2014_         | _Galiano_Monica_ |
| 3391 | 2014-08-28 | _EPI_ISL_167941_ | _A/New_Hampshire/18/2014_   | _Garten_Rebecca_ |
| 3392 | 2014-08-29 | _EPI_ISL_191036_ | _A/Paraguay/0097/2014_      | _Garten_Rebecca_ |
| 3393 | 2014-09-01 | _EPI_ISL_167936_ | _A/Michigan/09/2014_        | _Garten_Rebecca_ |
| 3394 | 2014-09-03 | _EPI_ISL_169492_ | _A/Alaska/52/2014_          | _Garten_Rebecca_ |
| 3395 | 2014-09-04 | _EPI_ISL_167919_ | _A/California/19/2014_      | _Garten_Rebecca_ |
| 3396 | 2014-09-04 | _EPI_ISL_172779_ | _A/Ethiopia/159/2014_       | _Garten_Rebecca_ |
| 3397 | 2014-09-07 | _EPI_ISL_169499_ | _A/Hawaii/40/2014_          | _Garten_Rebecca_ |
| 3398 | 2014-09-08 | _EPI_ISL_167399_ | _A/North_Carolina/20/2014_  | _Garten_Rebecca_ |
| 3399 | 2014-09-08 | _EPI_ISL_169471_ | _A/Alaska/40/2014_          | _Garten_Rebecca_ |
| 3400 | 2014-09-08 | _EPI_ISL_171365_ | _A/Laos/899/2014_           | _Garten_Rebecca_ |
| 3401 | 2014-09-08 | _EPI_ISL_173358_ | _A/Myanmar/14M465/2014_     | _Hiroki_Kondo_   |
| 3402 | 2014-09-09 | _EPI_ISL_169188_ | _A/SHIMANE/96/2014_         | _Takashita_Emi_  |
| 3403 | 2014-09-09 | _EPI_ISL_169503_ | _A/North_Carolina/23/2014_  | _Garten_Rebecca_ |
| 3404 | 2014-09-10 | _EPI_ISL_167937_ | _A/Michigan/10/2014_        | _Garten_Rebecca_ |
| 3405 | 2014-09-10 | _EPI_ISL_205389_ | _A/Thailand/CU-810828/2014_ | _EpiFluDB_       |
| 3406 | 2014-09-11 | _EPI_ISL_169192_ | _A/SAITAMA/96/2014_         | _Takashita_Emi_  |
| 3407 | 2014-09-12 | _EPI_ISL_188745_ | _A/England/44080181/2014_   | _Galiano_Monica_ |
| 3408 | 2014-09-13 | _EPI_ISL_166989_ | _A/Michigan/11/2014_        | _Garten_Rebecca_ |
| 3409 | 2014-09-13 | _EPI_ISL_166992_ | _A/Pennsylvania/40/2014_    | _Garten_Rebecca_ |
| 3410 | 2014-09-13 | _EPI_ISL_167949_ | _A/Pennsylvania/40/2014_    | _Garten_Rebecca_ |
| 3411 | 2014-09-16 | _EPI_ISL_166986_ | _A/Michigan/12/2014_        | _Garten_Rebecca_ |
| 3412 | 2014-09-16 | _EPI_ISL_167942_ | _A/New_Jersey/22/2014_      | _Garten_Rebecca_ |
| 3413 | 2014-09-16 | _EPI_ISL_168714_ | _A/Maryland/26/2014_        | _Garten_Rebecca_ |
| 3414 | 2014-09-16 | _EPI_ISL_170145_ | _A/Maryland/26/2014_        | _Garten_Rebecca_ |
| 3415 | 2014-09-16 | _EPI_ISL_171353_ | _A/Iquique/62331/2014_      | _Garten_Rebecca_ |
| 3416 | 2014-09-17 | _EPI_ISL_166982_ | _A/Minnesota/21/2014_       | _Garten_Rebecca_ |
| 3417 | 2014-09-17 | _EPI_ISL_166991_ | _A/Maryland/27/2014_        | _Garten_Rebecca_ |
| 3418 | 2014-09-17 | _EPI_ISL_167938_ | _A/Minnesota/21/2014_       | _Garten_Rebecca_ |
| 3419 | 2014-09-17 | _EPI_ISL_169457_ | _A/Arkansas/01/2014_        | _Garten_Rebecca_ |
| 3420 | 2014-09-17 | _EPI_ISL_169459_ | _A/Arkansas/02/2014_        | _Garten_Rebecca_ |
| 3421 | 2014-09-18 | _EPI_ISL_166983_ | _A/Michigan/13/2014_        | _Garten_Rebecca_ |
| 3422 | 2014-09-18 | _EPI_ISL_166987_ | _A/New_Mexico/27/2014_      | _Garten_Rebecca_ |
| 3423 | 2014-09-18 | _EPI_ISL_167943_ | _A/New_Mexico/27/2014_      | _Garten_Rebecca_ |
| 3424 | 2014-09-18 | _EPI_ISL_169500_ | _A/New_York/18/2014_        | _Garten_Rebecca_ |
| 3425 | 2014-09-19 | _EPI_ISL_166993_ | _A/Michigan/14/2014_        | _Garten_Rebecca_ |
| 3426 | 2014-09-19 | _EPI_ISL_168122_ | _A/Pennsylvania/42/2014_    | _Garten_Rebecca_ |
| 3427 | 2014-09-19 | _EPI_ISL_168962_ | _A/VICTORIA/5060/2014_      | _Komadina_Naomi_ |
| 3428 | 2014-09-20 | _EPI_ISL_166995_ | _A/Minnesota/22/2014_       | _Garten_Rebecca_ |
| 3429 | 2014-09-20 | _EPI_ISL_167939_ | _A/Minnesota/22/2014_       | _Garten_Rebecca_ |
| 3430 | 2014-09-22 | _EPI_ISL_168724_ | _A/Texas/40/2014_           | _Garten_Rebecca_ |
| 3431 | 2014-09-22 | _EPI_ISL_169462_ | _A/Arkansas/04/2014_        | _Garten_Rebecca_ |
| 3432 | 2014-09-22 | _EPI_ISL_173114_ | _A/Nagasaki/14N005/2014_    | _Hiroki_Kondo_   |
| 3433 | 2014-09-22 | _EPI_ISL_188738_ | _A/England/43960141/2014_   | _Galiano_Monica_ |
| 3434 | 2014-09-23 | _EPI_ISL_166988_ | _A/Florida/35/2014_         | _Garten_Rebecca_ |
| 3435 | 2014-09-23 | _EPI_ISL_167923_ | _A/Florida/35/2014_         | _Garten_Rebecca_ |
| 3436 | 2014-09-23 | _EPI_ISL_168704_ | _A/Florida/35/2014_         | _Garten_Rebecca_ |
| 3437 | 2014-09-23 | _EPI_ISL_169496_ | _A/New_York/19/2014_        | _Garten_Rebecca_ |
| 3438 | 2014-09-24 | _EPI_ISL_166994_ | _A/Michigan/15/2014_        | _Garten_Rebecca_ |
| 3439 | 2014-09-24 | _EPI_ISL_168135_ | _A/Arkansas/06/2014_        | _Garten_Rebecca_ |
| 3440 | 2014-09-24 | _EPI_ISL_168137_ | _A/Arkansas/05/2014_        | _Garten_Rebecca_ |
| 3441 | 2014-09-24 | _EPI_ISL_168138_ | _A/Pennsylvania/43/2014_    | _Garten_Rebecca_ |
| 3442 | 2014-09-24 | _EPI_ISL_169184_ | _A/Michigan/15/2014_        | _Garten_Rebecca_ |
| 3443 | 2014-09-24 | _EPI_ISL_169472_ | _A/North_Carolina/24/2014_  | _Garten_Rebecca_ |
| 3444 | 2014-09-24 | _EPI_ISL_192193_ | _A/ENG/44060047/2014_       | _Galiano_Monica_ |
| 3445 | 2014-09-25 | _EPI_ISL_167397_ | _A/Wisconsin/26/2014_       | _Garten_Rebecca_ |
| 3446 | 2014-09-25 | _EPI_ISL_167412_ | _A/Pennsylvania/45/2014_    | _Garten_Rebecca_ |
| 3447 | 2014-09-25 | _EPI_ISL_167398_ | _A/Wisconsin/25/2014_       | _Garten_Rebecca_ |
| 3448 | 2014-09-25 | _EPI_ISL_169497_ | _A/New_York/20/2014_        | _Garten_Rebecca_ |
| 3449 | 2014-09-26 | _EPI_ISL_167961_ | _A/Stockholm/24/2014_       | _Brytting_Maria_ |
| 3450 | 2014-09-26 | _EPI_ISL_188741_ | _A/England/44020584/2014_   | _Galiano_Monica_ |
| 3451 | 2014-09-27 | _EPI_ISL_167419_ | _A/Pennsylvania/44/2014_    | _Garten_Rebecca_ |
| 3452 | 2014-09-28 | _EPI_ISL_168127_ | _A/New_Hampshire/19/2014_   | _Garten_Rebecca_ |
| 3453 | 2014-09-29 | _EPI_ISL_168136_ | _A/Arkansas/07/2014_        | _Garten_Rebecca_ |
| 3454 | 2014-09-30 | _EPI_ISL_167413_ | _A/Florida/34/2014_         | _Garten_Rebecca_ |
| 3455 | 2014-09-30 | _EPI_ISL_169480_ | _A/Wisconsin/34/2014_       | _Garten_Rebecca_ |
| 3456 | 2014-09-30 | _EPI_ISL_169488_ | _A/Ohio/05/2014_            | _Garten_Rebecca_ |
| 3457 | 2014-10-01 | _EPI_ISL_166984_ | _A/Texas/37/2014_           | _Garten_Rebecca_ |
| 3458 | 2014-10-01 | _EPI_ISL_167950_ | _A/Texas/37/2014_           | _Garten_Rebecca_ |
| 3459 | 2014-10-01 | _EPI_ISL_168098_ | _A/Arkansas/08/2014_        | _Garten_Rebecca_ |
| 3460 | 2014-10-01 | _EPI_ISL_168109_ | _A/North_Dakota/06/2014_    | _Garten_Rebecca_ |
| 3461 | 2014-10-01 | _EPI_ISL_168723_ | _A/Texas/37/2014_           | _Garten_Rebecca_ |
| 3462 | 2014-10-02 | _EPI_ISL_188747_ | _A/England/44160198/2014_   | _Galiano_Monica_ |
| 3463 | 2014-10-02 | _EPI_ISL_188748_ | _A/England/44160199/2014_   | _Galiano_Monica_ |
| 3464 | 2014-10-02 | _EPI_ISL_188749_ | _A/England/511/2014_        | _Galiano_Monica_ |
| 3465 | 2014-10-02 | _EPI_ISL_188750_ | _A/England/44160201/2014_   | _Galiano_Monica_ |
| 3466 | 2014-10-02 | _EPI_ISL_188751_ | _A/England/44160202/2014_   | _Galiano_Monica_ |
| 3467 | 2014-10-02 | _EPI_ISL_188752_ | _A/England/512/2014_        | _Galiano_Monica_ |
| 3468 | 2014-10-03 | _EPI_ISL_167416_ | _A/Florida/36/2014_         | _Garten_Rebecca_ |
| 3469 | 2014-10-03 | _EPI_ISL_168130_ | _A/Connecticut/19/2014_     | _Garten_Rebecca_ |
| 3470 | 2014-10-03 | _EPI_ISL_168700_ | _A/Colorado/16/2014_        | _Garten_Rebecca_ |
| 3471 | 2014-10-04 | _EPI_ISL_167396_ | _A/Kentucky/10/2014_        | _Garten_Rebecca_ |
| 3472 | 2014-10-04 | _EPI_ISL_167408_ | _A/Colorado/15/2014_        | _Garten_Rebecca_ |
| 3473 | 2014-10-04 | _EPI_ISL_168113_ | _A/Colorado/15/2014_        | _Garten_Rebecca_ |
| 3474 | 2014-10-04 | _EPI_ISL_169326_ | _A/Alaska/46/2014_          | _Garten_Rebecca_ |
| 3475 | 2014-10-04 | _EPI_ISL_171393_ | _A/Alberta/RV3215/2014_     | _Garten_Rebecca_ |
| 3476 | 2014-10-05 | _EPI_ISL_168721_ | _A/Oregon/09/2014_          | _Garten_Rebecca_ |
| 3477 | 2014-10-05 | _EPI_ISL_169325_ | _A/Alaska/47/2014_          | _Garten_Rebecca_ |
| 3478 | 2014-10-06 | _EPI_ISL_166985_ | _A/Texas/38/2014_           | _Garten_Rebecca_ |
| 3479 | 2014-10-06 | _EPI_ISL_167422_ | _A/North_Carolina/21/2014_  | _Garten_Rebecca_ |
| 3480 | 2014-10-06 | _EPI_ISL_167946_ | _A/North_Carolina/21/2014_  | _Garten_Rebecca_ |
| 3481 | 2014-10-06 | _EPI_ISL_167953_ | _A/Washington/18/2014_      | _Garten_Rebecca_ |
| 3482 | 2014-10-06 | _EPI_ISL_168117_ | _A/Mississippi/07/2014_     | _Garten_Rebecca_ |
| 3483 | 2014-10-06 | _EPI_ISL_168717_ | _A/North_Carolina/21/2014_  | _Garten_Rebecca_ |
| 3484 | 2014-10-06 | _EPI_ISL_169456_ | _A/Florida/43/2014_         | _Garten_Rebecca_ |
| 3485 | 2014-10-06 | _EPI_ISL_171374_ | _A/Quebec/RV3213/2014_      | _Garten_Rebecca_ |
| 3486 | 2014-10-06 | _EPI_ISL_205397_ | _A/Thailand/CU-810975/2014_ | _EpiFluDB_       |
| 3487 | 2014-10-07 | _EPI_ISL_167414_ | _A/Florida/39/2014_         | _Garten_Rebecca_ |
| 3488 | 2014-10-07 | _EPI_ISL_167415_ | _A/Florida/40/2014_         | _Garten_Rebecca_ |
| 3489 | 2014-10-07 | _EPI_ISL_167417_ | _A/Florida/38/2014_         | _Garten_Rebecca_ |
| 3490 | 2014-10-07 | _EPI_ISL_167924_ | _A/Florida/37/2014_         | _Garten_Rebecca_ |
| 3491 | 2014-10-07 | _EPI_ISL_167925_ | _A/Florida/38/2014_         | _Garten_Rebecca_ |
| 3492 | 2014-10-07 | _EPI_ISL_167926_ | _A/Florida/39/2014_         | _Garten_Rebecca_ |
| 3493 | 2014-10-07 | _EPI_ISL_167927_ | _A/Florida/40/2014_         | _Garten_Rebecca_ |
| 3494 | 2014-10-07 | _EPI_ISL_168707_ | _A/Louisiana/06/2014_       | _Garten_Rebecca_ |
| 3495 | 2014-10-07 | _EPI_ISL_167418_ | _A/Florida/37/2014_         | _Garten_Rebecca_ |
| 3496 | 2014-10-07 | _EPI_ISL_195934_ | _A/Singapore/KK943/2014_    | _Garten_Rebecca_ |
| 3497 | 2014-10-09 | _EPI_ISL_167401_ | _A/Wyoming/08/2014_         | _Garten_Rebecca_ |
| 3498 | 2014-10-09 | _EPI_ISL_167402_ | _A/Wyoming/09/2014_         | _Garten_Rebecca_ |
| 3499 | 2014-10-09 | _EPI_ISL_167411_ | _A/Maine/04/2014_           | _Garten_Rebecca_ |
| 3500 | 2014-10-09 | _EPI_ISL_167933_ | _A/Maine/04/2014_           | _Garten_Rebecca_ |
| 3501 | 2014-10-09 | _EPI_ISL_168115_ | _A/Wyoming/08/2014_         | _Garten_Rebecca_ |
| 3502 | 2014-10-09 | _EPI_ISL_168718_ | _A/Oregon/05/2014_          | _Garten_Rebecca_ |
| 3503 | 2014-10-09 | _EPI_ISL_168719_ | _A/Oregon/06/2014_          | _Garten_Rebecca_ |
| 3504 | 2014-10-09 | _EPI_ISL_169283_ | _A/Iowa/13/2014_            | _Garten_Rebecca_ |
| 3505 | 2014-10-10 | _EPI_ISL_168708_ | _A/Louisiana/07/2014_       | _Garten_Rebecca_ |

|      |            |                  |                                  |                  |
|------|------------|------------------|----------------------------------|------------------|
| 3506 | 2014-10-10 | _EPI_ISL_169476_ | _A/New_York/24/2014_             | _Garten_Rebecca_ |
| 3507 | 2014-10-10 | _EPI_ISL_170681_ | _A/California/27/2014_           | _Garten_Rebecca_ |
| 3508 | 2014-10-10 | _EPI_ISL_188753_ | _A/England/44320792/2014_        | _Galiano_Monica_ |
| 3509 | 2014-10-10 | _EPI_ISL_191431_ | _A/Washington/20/2014_           | _Garten_Rebecca_ |
| 3510 | 2014-10-11 | _EPI_ISL_168129_ | _A/Delaware/19/2014_             | _Garten_Rebecca_ |
| 3511 | 2014-10-11 | _EPI_ISL_168709_ | _A/Louisiana/08/2014_            | _Garten_Rebecca_ |
| 3512 | 2014-10-11 | _EPI_ISL_168710_ | _A/Louisiana/09/2014_            | _Garten_Rebecca_ |
| 3513 | 2014-10-11 | _EPI_ISL_169493_ | _A/Louisiana/08/2014_            | _Garten_Rebecca_ |
| 3514 | 2014-10-12 | _EPI_ISL_168705_ | _A/Florida/45/2014_              | _Garten_Rebecca_ |
| 3515 | 2014-10-12 | _EPI_ISL_169458_ | _A/Florida/45/2014_              | _Garten_Rebecca_ |
| 3516 | 2014-10-12 | _EPI_ISL_171391_ | _A/Alberta/RV3246/2014_          | _Garten_Rebecca_ |
| 3517 | 2014-10-12 | _EPI_ISL_172552_ | _A/Alberta/RV3246/2014_          | _Garten_Rebecca_ |
| 3518 | 2014-10-12 | _EPI_ISL_169318_ | _A/Iowa/14/2014_                 | _Garten_Rebecca_ |
| 3519 | 2014-10-12 | _EPI_ISL_186565_ | _A/England/513/2014_             | _Galiano_Monica_ |
| 3520 | 2014-10-14 | _EPI_ISL_167404_ | _A/Mississippi/06/2014_          | _Garten_Rebecca_ |
| 3521 | 2014-10-14 | _EPI_ISL_167407_ | _A/Mississippi/05/2014_          | _Garten_Rebecca_ |
| 3522 | 2014-10-14 | _EPI_ISL_167952_ | _A/Virginia/16/2014_             | _Garten_Rebecca_ |
| 3523 | 2014-10-14 | _EPI_ISL_168124_ | _A/Mississippi/05/2014_          | _Garten_Rebecca_ |
| 3524 | 2014-10-14 | _EPI_ISL_168703_ | _A/Connecticut/21/2014_          | _Garten_Rebecca_ |
| 3525 | 2014-10-14 | _EPI_ISL_168713_ | _A/Maine/05/2014_                | _Garten_Rebecca_ |
| 3526 | 2014-10-14 | _EPI_ISL_169463_ | _A/New_York/26/2014_             | _Garten_Rebecca_ |
| 3527 | 2014-10-14 | _EPI_ISL_169490_ | _A/Connecticut/21/2014_          | _Garten_Rebecca_ |
| 3528 | 2014-10-14 | _EPI_ISL_169498_ | _A/Maryland/28/2014_             | _Garten_Rebecca_ |
| 3529 | 2014-10-14 | _EPI_ISL_169505_ | _A/New_York/28/2014_             | _Garten_Rebecca_ |
| 3530 | 2014-10-14 | _EPI_ISL_205398_ | _A/Thailand/CU-811065/2014_      | _EpiFluDB_       |
| 3531 | 2014-10-15 | _EPI_ISL_167059_ | _A/Stockholm/21/2014_            | _Brytting_Maria_ |
| 3532 | 2014-10-15 | _EPI_ISL_168116_ | _A/Mississippi/03/2014_          | _Garten_Rebecca_ |
| 3533 | 2014-10-15 | _EPI_ISL_168118_ | _A/New_Mexico/28/2014_           | _Garten_Rebecca_ |
| 3534 | 2014-10-15 | _EPI_ISL_168726_ | _A/Texas/43/2014_                | _Garten_Rebecca_ |
| 3535 | 2014-10-15 | _EPI_ISL_167405_ | _A/Mississippi/03/2014_          | _Garten_Rebecca_ |
| 3536 | 2014-10-15 | _EPI_ISL_169504_ | _A/Maryland/32/2014_             | _Garten_Rebecca_ |
| 3537 | 2014-10-15 | _EPI_ISL_188755_ | _A/England/44320794/2014_        | _Galiano_Monica_ |
| 3538 | 2014-10-16 | _EPI_ISL_167406_ | _A/Mississippi/04/2014_          | _Garten_Rebecca_ |
| 3539 | 2014-10-16 | _EPI_ISL_168108_ | _A/Mississippi/04/2014_          | _Garten_Rebecca_ |
| 3540 | 2014-10-16 | _EPI_ISL_171395_ | _A/Alberta/RV3240/2014_          | _Garten_Rebecca_ |
| 3541 | 2014-10-16 | _EPI_ISL_188754_ | _A/England/44320793/2014_        | _Galiano_Monica_ |
| 3542 | 2014-10-17 | _EPI_ISL_168099_ | _A/Montana/11/2014_              | _Garten_Rebecca_ |
| 3543 | 2014-10-17 | _EPI_ISL_168716_ | _A/New_Hampshire/21/2014_        | _Garten_Rebecca_ |
| 3544 | 2014-10-17 | _EPI_ISL_169487_ | _A/New_Hampshire/21/2014_        | _Garten_Rebecca_ |
| 3545 | 2014-10-17 | _EPI_ISL_169506_ | _A/New_York/31/2014_             | _Garten_Rebecca_ |
| 3546 | 2014-10-17 | _EPI_ISL_169507_ | _A/New_York/34/2014_             | _Garten_Rebecca_ |
| 3547 | 2014-10-18 | _EPI_ISL_167956_ | _A/Stockholm/22/2014_            | _Brytting_Maria_ |
| 3548 | 2014-10-18 | _EPI_ISL_168139_ | _A/Minnesota/28/2014_            | _Garten_Rebecca_ |
| 3549 | 2014-10-18 | _EPI_ISL_168102_ | _A/Colorado/19/2014_             | _Garten_Rebecca_ |
| 3550 | 2014-10-18 | _EPI_ISL_169465_ | _A/Hawaii/48/2014_               | _Garten_Rebecca_ |
| 3551 | 2014-10-18 | _EPI_ISL_169466_ | _A/Hawaii/49/2014_               | _Garten_Rebecca_ |
| 3552 | 2014-10-18 | _EPI_ISL_169484_ | _A/Maine/06/2014_                | _Garten_Rebecca_ |
| 3553 | 2014-10-18 | _EPI_ISL_172607_ | _A/California/50/2014_           | _Garten_Rebecca_ |
| 3554 | 2014-10-18 | _EPI_ISL_188756_ | _A/England/44320795/2014_        | _Galiano_Monica_ |
| 3555 | 2014-10-19 | _EPI_ISL_167959_ | _A/Malmoe/4/2014_                | _Brytting_Maria_ |
| 3556 | 2014-10-19 | _EPI_ISL_172497_ | _A/California/51/2014_           | _Garten_Rebecca_ |
| 3557 | 2014-10-20 | _EPI_ISL_168140_ | _A/Texas/41/2014_                | _Garten_Rebecca_ |
| 3558 | 2014-10-20 | _EPI_ISL_168698_ | _A/Alabama/05/2014_              | _Garten_Rebecca_ |
| 3559 | 2014-10-20 | _EPI_ISL_169107_ | _A/Iowa/15/2014_                 | _Garten_Rebecca_ |
| 3560 | 2014-10-20 | _EPI_ISL_169469_ | _A/Arkansas/11/2014_             | _Garten_Rebecca_ |
| 3561 | 2014-10-20 | _EPI_ISL_169502_ | _A/Arkansas/10/2014_             | _Garten_Rebecca_ |
| 3562 | 2014-10-20 | _EPI_ISL_171386_ | _A/Santiago/68839/2014_          | _Garten_Rebecca_ |
| 3563 | 2014-10-20 | _EPI_ISL_172733_ | _A/Ethiopia/1140/2014_           | _Garten_Rebecca_ |
| 3564 | 2014-10-20 | _EPI_ISL_172778_ | _A/Santiago/68839/2014_          | _Garten_Rebecca_ |
| 3565 | 2014-10-20 | _EPI_ISL_177533_ | _A/Laos/1115/2014_               | _Garten_Rebecca_ |
| 3566 | 2014-10-21 | _EPI_ISL_167957_ | _A/Stockholm/25/2014_            | _Brytting_Maria_ |
| 3567 | 2014-10-21 | _EPI_ISL_168101_ | _A/Colorado/21/2014_             | _Garten_Rebecca_ |
| 3568 | 2014-10-21 | _EPI_ISL_168711_ | _A/Louisiana/11/2014_            | _Garten_Rebecca_ |
| 3569 | 2014-10-21 | _EPI_ISL_169089_ | _A/Louisiana/12/2014_            | _Garten_Rebecca_ |
| 3570 | 2014-10-21 | _EPI_ISL_169103_ | _A/Iowa/16/2014_                 | _Garten_Rebecca_ |
| 3571 | 2014-10-21 | _EPI_ISL_169108_ | _A/Louisiana/13/2014_            | _Garten_Rebecca_ |
| 3572 | 2014-10-21 | _EPI_ISL_169311_ | _A/Delaware/22/2014_             | _Garten_Rebecca_ |
| 3573 | 2014-10-21 | _EPI_ISL_169467_ | _A/Arkansas/12/2014_             | _Garten_Rebecca_ |
| 3574 | 2014-10-21 | _EPI_ISL_169485_ | _A/Louisiana/12/2014_            | _Garten_Rebecca_ |
| 3575 | 2014-10-21 | _EPI_ISL_169508_ | _A/New_York/35/2014_             | _Garten_Rebecca_ |
| 3576 | 2014-10-21 | _EPI_ISL_171352_ | _A/Ethiopia/1141/2014_           | _Garten_Rebecca_ |
| 3577 | 2014-10-22 | _EPI_ISL_168712_ | _A/Louisiana/14/2014_            | _Garten_Rebecca_ |
| 3578 | 2014-10-22 | _EPI_ISL_168725_ | _A/Texas/42/2014_                | _Garten_Rebecca_ |
| 3579 | 2014-10-22 | _EPI_ISL_169473_ | _A/Texas/42/2014_                | _Garten_Rebecca_ |
| 3580 | 2014-10-22 | _EPI_ISL_169486_ | _A/Louisiana/14/2014_            | _Garten_Rebecca_ |
| 3581 | 2014-10-22 | _EPI_ISL_169495_ | _A/Washington/19/2014_           | _Garten_Rebecca_ |
| 3582 | 2014-10-23 | _EPI_ISL_169093_ | _A/Alabama/07/2014_              | _Garten_Rebecca_ |
| 3583 | 2014-10-23 | _EPI_ISL_169094_ | _A/Mississippi/08/2014_          | _Garten_Rebecca_ |
| 3584 | 2014-10-23 | _EPI_ISL_169331_ | _A/Maryland/34/2014_             | _Garten_Rebecca_ |
| 3585 | 2014-10-23 | _EPI_ISL_169470_ | _A/Mississippi/08/2014_          | _Garten_Rebecca_ |
| 3586 | 2014-10-23 | _EPI_ISL_169494_ | _A/Wisconsin/44/2014_            | _Garten_Rebecca_ |
| 3587 | 2014-10-23 | _EPI_ISL_169501_ | _A/New_York/36/2014_             | _Garten_Rebecca_ |
| 3588 | 2014-10-23 | _EPI_ISL_171378_ | _A/Ethiopia/546/2014_            | _Garten_Rebecca_ |
| 3589 | 2014-10-23 | _EPI_ISL_172532_ | _A/Ethiopia/1146/2014_           | _Garten_Rebecca_ |
| 3590 | 2014-10-24 | _EPI_ISL_168782_ | _A/ENG/516/2014_                 | _Galiano_Monica_ |
| 3591 | 2014-10-24 | _EPI_ISL_169090_ | _A/North_Dakota/09/2014_         | _Garten_Rebecca_ |
| 3592 | 2014-10-24 | _EPI_ISL_172609_ | _A/California/52/2014_           | _Garten_Rebecca_ |
| 3593 | 2014-10-24 | _EPI_ISL_186566_ | _A/England/516/2014_             | _Galiano_Monica_ |
| 3594 | 2014-10-25 | _EPI_ISL_167958_ | _A/Stockholm/23/2014_            | _Brytting_Maria_ |
| 3595 | 2014-10-25 | _EPI_ISL_168706_ | _A/Indiana/10/2014_              | _Garten_Rebecca_ |
| 3596 | 2014-10-25 | _EPI_ISL_169468_ | _A/Iowa/17/2014_                 | _Garten_Rebecca_ |
| 3597 | 2014-10-25 | _EPI_ISL_171371_ | _A/Ontario/RV3241/2014_          | _Garten_Rebecca_ |
| 3598 | 2014-10-25 | _EPI_ISL_172568_ | _A/Ontario/RV3241/2014_          | _Garten_Rebecca_ |
| 3599 | 2014-10-26 | _EPI_ISL_171369_ | _A/Santiago/70123/2014_          | _Garten_Rebecca_ |
| 3600 | 2014-10-26 | _EPI_ISL_172611_ | _A/California/53/2014_           | _Garten_Rebecca_ |
| 3601 | 2014-10-27 | _EPI_ISL_169099_ | _A/Texas/48/2014_                | _Garten_Rebecca_ |
| 3602 | 2014-10-27 | _EPI_ISL_169118_ | _A/Kansas/07/2014_               | _Garten_Rebecca_ |
| 3603 | 2014-10-27 | _EPI_ISL_169491_ | _A/Illinois/04/2014_             | _Garten_Rebecca_ |
| 3604 | 2014-10-27 | _EPI_ISL_172592_ | _A/Ethiopia/1147/2014_           | _Garten_Rebecca_ |
| 3605 | 2014-10-27 | _EPI_ISL_169314_ | _A/Nevada/20/2014_               | _Garten_Rebecca_ |
| 3606 | 2014-10-28 | _EPI_ISL_169097_ | _A/Montana/14/2014_              | _Garten_Rebecca_ |
| 3607 | 2014-10-28 | _EPI_ISL_169453_ | _A/Wisconsin/46/2014_            | _Garten_Rebecca_ |
| 3608 | 2014-10-28 | _EPI_ISL_172515_ | _A/Minnesota/31/2014_            | _Garten_Rebecca_ |
| 3609 | 2014-10-28 | _EPI_ISL_172582_ | _A/Arkansas/13/2014_             | _Garten_Rebecca_ |
| 3610 | 2014-10-28 | _EPI_ISL_188757_ | _A/England/44540273/2014_        | _Galiano_Monica_ |
| 3611 | 2014-10-29 | _EPI_ISL_169086_ | _A/Ohio/03/2014_                 | _Garten_Rebecca_ |
| 3612 | 2014-10-29 | _EPI_ISL_169096_ | _A/Mississippi/09/2014_          | _Garten_Rebecca_ |
| 3613 | 2014-10-29 | _EPI_ISL_169117_ | _A/Kansas/08/2014_               | _Garten_Rebecca_ |
| 3614 | 2014-10-29 | _EPI_ISL_169119_ | _A/Maryland/33/2014_             | _Garten_Rebecca_ |
| 3615 | 2014-10-29 | _EPI_ISL_169120_ | _A/Ohio/04/2014_                 | _Garten_Rebecca_ |
| 3616 | 2014-10-30 | _EPI_ISL_169098_ | _A/Montana/15/2014_              | _Garten_Rebecca_ |
| 3617 | 2014-10-30 | _EPI_ISL_169102_ | _A/Texas/46/2014_                | _Garten_Rebecca_ |
| 3618 | 2014-10-30 | _EPI_ISL_169949_ | _A/Texas/66/2014_                | _Garten_Rebecca_ |
| 3619 | 2014-10-30 | _EPI_ISL_172601_ | _A/District_Of_Columbia/03/2014_ | _Garten_Rebecca_ |
| 3620 | 2014-10-31 | _EPI_ISL_171879_ | _A/OSAKA-C/2020/2014_            | _Takashita_Emi_  |
| 3621 | 2014-11-01 | _EPI_ISL_205399_ | _A/Thailand/CU-811202/2014_      | _EpiFluDB_       |
| 3622 | 2014-11-02 | _EPI_ISL_169113_ | _A/Utah/18/2014_                 | _Garten_Rebecca_ |
| 3623 | 2014-11-02 | _EPI_ISL_169256_ | _A/Sweden/76/2014_               | _Brytting_Maria_ |
| 3624 | 2014-11-03 | _EPI_ISL_169091_ | _A/Missouri/09/2014_             | _Garten_Rebecca_ |
| 3625 | 2014-11-03 | _EPI_ISL_169095_ | _A/Mississippi/10/2014_          | _Garten_Rebecca_ |
| 3626 | 2014-11-03 | _EPI_ISL_169134_ | _A/Stockholm/26/2014_            | _Brytting_Maria_ |

|      |            |                  |                                  |                  |
|------|------------|------------------|----------------------------------|------------------|
| 3627 | 2014-11-03 | _EPI_ISL_169481_ | _A/Texas/62/2014_                | _Garten_Rebecca_ |
| 3628 | 2014-11-03 | _EPI_ISL_169936_ | _A/Hawaii/60/2014_               | _Garten_Rebecca_ |
| 3629 | 2014-11-03 | _EPI_ISL_170126_ | _A/Ilinois/05/2014_              | _Garten_Rebecca_ |
| 3630 | 2014-11-03 | _EPI_ISL_171345_ | _A/Shaanxi-Changan/1452/2014_    | _Garten_Rebecca_ |
| 3631 | 2014-11-03 | _EPI_ISL_172765_ | _A/Ontario/RV3531/2014_          | _Garten_Rebecca_ |
| 3632 | 2014-11-03 | _EPI_ISL_169344_ | _A/Ilinois/05/2014_              | _Garten_Rebecca_ |
| 3633 | 2014-11-04 | _EPI_ISL_169126_ | _A/Mississippi/11/2014_          | _Garten_Rebecca_ |
| 3634 | 2014-11-04 | _EPI_ISL_169317_ | _A/North_Carolina/28/2014_       | _Garten_Rebecca_ |
| 3635 | 2014-11-04 | _EPI_ISL_171400_ | _A/Xinjiang-Tianshan/11190/2014_ | _Garten_Rebecca_ |
| 3636 | 2014-11-04 | _EPI_ISL_172812_ | _A/Guatemala/179/2014_           | _Garten_Rebecca_ |
| 3637 | 2014-11-04 | _EPI_ISL_176333_ | _A/Nagasaki/14N010/2014_         | Hiroki_Kondo_    |
| 3638 | 2014-11-05 | _EPI_ISL_169087_ | _A/Indiana/12/2014_              | _Garten_Rebecca_ |
| 3639 | 2014-11-05 | _EPI_ISL_169092_ | _A/Mississippi/12/2014_          | _Garten_Rebecca_ |
| 3640 | 2014-11-05 | _EPI_ISL_169111_ | _A/Utah/20/2014_                 | _Garten_Rebecca_ |
| 3641 | 2014-11-05 | _EPI_ISL_169122_ | _A/Alabama/09/2014_              | _Garten_Rebecca_ |
| 3642 | 2014-11-05 | _EPI_ISL_169127_ | _A/Idaho/04/2014_                | _Garten_Rebecca_ |
| 3643 | 2014-11-05 | _EPI_ISL_169130_ | _A/Indiana/11/2014_              | _Garten_Rebecca_ |
| 3644 | 2014-11-05 | _EPI_ISL_169329_ | _A/Texas/52/2014_                | _Garten_Rebecca_ |
| 3645 | 2014-11-05 | _EPI_ISL_169929_ | _A/Alabama/08/2014_              | _Garten_Rebecca_ |
| 3646 | 2014-11-05 | _EPI_ISL_170021_ | _A/Alabama/09/2014_              | _Garten_Rebecca_ |
| 3647 | 2014-11-06 | _EPI_ISL_169109_ | _A/Utah/21/2014_                 | _Garten_Rebecca_ |
| 3648 | 2014-11-06 | _EPI_ISL_169112_ | _A/Utah/17/2014_                 | _Garten_Rebecca_ |
| 3649 | 2014-11-06 | _EPI_ISL_169133_ | _A/Karlstad/1/2014_              | Brytting_Maria_  |
| 3650 | 2014-11-06 | _EPI_ISL_169255_ | _A/Gothenburg/4/2014_            | Brytting_Maria_  |
| 3651 | 2014-11-06 | _EPI_ISL_169407_ | _A/SENDAl/72/2014_               | Takashita_Emi_   |
| 3652 | 2014-11-06 | _EPI_ISL_169928_ | _A/Utah/17/2014_                 | _Garten_Rebecca_ |
| 3653 | 2014-11-07 | _EPI_ISL_169088_ | _A/Indiana/13/2014_              | _Garten_Rebecca_ |
| 3654 | 2014-11-07 | _EPI_ISL_169110_ | _A/Utah/19/2014_                 | _Garten_Rebecca_ |
| 3655 | 2014-11-07 | _EPI_ISL_169306_ | _A/Wyoming/11/2014_              | _Garten_Rebecca_ |
| 3656 | 2014-11-07 | _EPI_ISL_169452_ | _A/Colorado/24/2014_             | _Garten_Rebecca_ |
| 3657 | 2014-11-07 | _EPI_ISL_173853_ | _A/Utah/19/2014_                 | _Garten_Rebecca_ |
| 3658 | 2014-11-08 | _EPI_ISL_169125_ | _A/Utah/22/2014_                 | _Garten_Rebecca_ |
| 3659 | 2014-11-08 | _EPI_ISL_169321_ | _A/North_Carolina/29/2014_       | _Garten_Rebecca_ |
| 3660 | 2014-11-08 | _EPI_ISL_169482_ | _A/Wisconsin/48/2014_            | _Garten_Rebecca_ |
| 3661 | 2014-11-08 | _EPI_ISL_170686_ | _A/Florida/58/2014_              | _Garten_Rebecca_ |
| 3662 | 2014-11-09 | _EPI_ISL_169479_ | _A/Wisconsin/49/2014_            | _Garten_Rebecca_ |
| 3663 | 2014-11-09 | _EPI_ISL_170707_ | _A/Colorado/25/2014_             | _Garten_Rebecca_ |
| 3664 | 2014-11-09 | _EPI_ISL_171876_ | _A/NIIGATA-C/60/2014_            | Takashita_Emi_   |
| 3665 | 2014-11-09 | _EPI_ISL_172606_ | _A/Ohio/14/2014_                 | _Garten_Rebecca_ |
| 3666 | 2014-11-09 | _EPI_ISL_188758_ | _A/England/44640016/2014_        | Galiano_Monica_  |
| 3667 | 2014-11-10 | _EPI_ISL_169101_ | _A/Indiana/15/2014_              | _Garten_Rebecca_ |
| 3668 | 2014-11-10 | _EPI_ISL_169106_ | _A/Indiana/16/2014_              | _Garten_Rebecca_ |
| 3669 | 2014-11-10 | _EPI_ISL_169123_ | _A/Nevada/18/2014_               | _Garten_Rebecca_ |
| 3670 | 2014-11-10 | _EPI_ISL_169124_ | _A/Nevada/17/2014_               | _Garten_Rebecca_ |
| 3671 | 2014-11-10 | _EPI_ISL_169933_ | _A/Ilinois/07/2014_              | _Garten_Rebecca_ |
| 3672 | 2014-11-10 | _EPI_ISL_170030_ | _A/Michigan/18/2014_             | _Garten_Rebecca_ |
| 3673 | 2014-11-10 | _EPI_ISL_170047_ | _A/Michigan/17/2014_             | _Garten_Rebecca_ |
| 3674 | 2014-11-10 | _EPI_ISL_170432_ | _A/TOYAMA/124/2014_              | Takashita_Emi_   |
| 3675 | 2014-11-11 | _EPI_ISL_169337_ | _A/Delaware/24/2014_             | _Garten_Rebecca_ |
| 3676 | 2014-11-11 | _EPI_ISL_169475_ | _A/Montana/20/2014_              | _Garten_Rebecca_ |
| 3677 | 2014-11-11 | _EPI_ISL_169085_ | _A/Indiana/17/2014_              | _Garten_Rebecca_ |
| 3678 | 2014-11-11 | _EPI_ISL_171380_ | _A/Ethiopia/1153/2014_           | _Garten_Rebecca_ |
| 3679 | 2014-11-11 | _EPI_ISL_172804_ | _A/Ohio/15/2014_                 | _Garten_Rebecca_ |
| 3680 | 2014-11-11 | _EPI_ISL_176669_ | _A/Cambodia/1244/2014_           | _Garten_Rebecca_ |
| 3681 | 2014-11-12 | _EPI_ISL_169483_ | _A/Indiana/19/2014_              | _Garten_Rebecca_ |
| 3682 | 2014-11-12 | _EPI_ISL_170121_ | _A/Minnesota/34/2014_            | _Garten_Rebecca_ |
| 3683 | 2014-11-12 | _EPI_ISL_172528_ | _A/Guatemala/4645/2014_          | _Garten_Rebecca_ |
| 3684 | 2014-11-12 | _EPI_ISL_172534_ | _A/Guatemala/4638/2014_          | _Garten_Rebecca_ |
| 3685 | 2014-11-12 | _EPI_ISL_172808_ | _A/Ethiopia/1159/2014_           | _Garten_Rebecca_ |
| 3686 | 2014-11-13 | _EPI_ISL_169286_ | _A/North_Carolina/31/2014_       | _Garten_Rebecca_ |
| 3687 | 2014-11-13 | _EPI_ISL_169319_ | _A/North_Carolina/34/2014_       | _Garten_Rebecca_ |
| 3688 | 2014-11-13 | _EPI_ISL_169323_ | _A/North_Carolina/32/2014_       | _Garten_Rebecca_ |
| 3689 | 2014-11-13 | _EPI_ISL_170028_ | _A/North_Carolina/31/2014_       | _Garten_Rebecca_ |
| 3690 | 2014-11-13 | _EPI_ISL_170106_ | _A/North_Carolina/33/2014_       | _Garten_Rebecca_ |
| 3691 | 2014-11-13 | _EPI_ISL_170124_ | _A/Hawaii/59/2014_               | _Garten_Rebecca_ |
| 3692 | 2014-11-13 | _EPI_ISL_171379_ | _A/Georgia/15/2014_              | _Garten_Rebecca_ |
| 3693 | 2014-11-13 | _EPI_ISL_172535_ | _A/Guatemala/5211/2014_          | _Garten_Rebecca_ |
| 3694 | 2014-11-13 | _EPI_ISL_172760_ | _A/Mississippi/17/2014_          | _Garten_Rebecca_ |
| 3695 | 2014-11-13 | _EPI_ISL_205400_ | _A/Thailand/CU-H3680/2014_       | _EpiFluDB_       |
| 3696 | 2014-11-14 | _EPI_ISL_169300_ | _A/Wyoming/14/2014_              | _Garten_Rebecca_ |
| 3697 | 2014-11-14 | _EPI_ISL_169304_ | _A/North_Carolina/35/2014_       | _Garten_Rebecca_ |
| 3698 | 2014-11-14 | _EPI_ISL_169930_ | _A/Michigan/19/2014_             | _Garten_Rebecca_ |
| 3699 | 2014-11-14 | _EPI_ISL_170132_ | _A/Georgia/13/2014_              | _Garten_Rebecca_ |
| 3700 | 2014-11-14 | _EPI_ISL_171361_ | _A/Georgia/19/2014_              | _Garten_Rebecca_ |
| 3701 | 2014-11-14 | _EPI_ISL_172530_ | _A/Guatemala/4647/2014_          | _Garten_Rebecca_ |
| 3702 | 2014-11-14 | _EPI_ISL_172539_ | _A/Iowa/20/2014_                 | _Garten_Rebecca_ |
| 3703 | 2014-11-14 | _EPI_ISL_172759_ | _A/Tanzania/542/2014_            | _Garten_Rebecca_ |
| 3704 | 2014-11-14 | _EPI_ISL_172781_ | _A/Tanzania/3552/2014_           | _Garten_Rebecca_ |
| 3705 | 2014-11-16 | _EPI_ISL_170123_ | _A/Minnesota/37/2014_            | _Garten_Rebecca_ |
| 3706 | 2014-11-16 | _EPI_ISL_172796_ | _A/Tanzania/3555/2014_           | _Garten_Rebecca_ |
| 3707 | 2014-11-17 | _EPI_ISL_169307_ | _A/New_Jersey/26/2014_           | _Garten_Rebecca_ |
| 3708 | 2014-11-17 | _EPI_ISL_169336_ | _A/Missouri/10/2014_             | _Garten_Rebecca_ |
| 3709 | 2014-11-17 | _EPI_ISL_169913_ | _A/Texas/54/2014_                | _Garten_Rebecca_ |
| 3710 | 2014-11-18 | _EPI_ISL_169257_ | _A/Stockholm/29/2014_            | Brytting_Maria_  |
| 3711 | 2014-11-18 | _EPI_ISL_169292_ | _A/Louisiana/17/2014_            | _Garten_Rebecca_ |
| 3712 | 2014-11-18 | _EPI_ISL_169294_ | _A/Louisiana/18/2014_            | _Garten_Rebecca_ |
| 3713 | 2014-11-18 | _EPI_ISL_169320_ | _A/Louisiana/19/2014_            | _Garten_Rebecca_ |
| 3714 | 2014-11-18 | _EPI_ISL_169322_ | _A/Wyoming/15/2014_              | _Garten_Rebecca_ |
| 3715 | 2014-11-18 | _EPI_ISL_169333_ | _A/Missouri/11/2014_             | _Garten_Rebecca_ |
| 3716 | 2014-11-18 | _EPI_ISL_169903_ | _A/Texas/55/2014_                | _Garten_Rebecca_ |
| 3717 | 2014-11-18 | _EPI_ISL_170034_ | _A/New_Mexico/29/2014_           | _Garten_Rebecca_ |
| 3718 | 2014-11-18 | _EPI_ISL_170111_ | _A/Massachusetts/20/2014_        | _Garten_Rebecca_ |
| 3719 | 2014-11-18 | _EPI_ISL_170120_ | _A/Oregon/13/2014_               | _Garten_Rebecca_ |
| 3720 | 2014-11-18 | _EPI_ISL_170127_ | _A/Wyoming/15/2014_              | _Garten_Rebecca_ |
| 3721 | 2014-11-18 | _EPI_ISL_170128_ | _A/Louisiana/17/2014_            | _Garten_Rebecca_ |
| 3722 | 2014-11-18 | _EPI_ISL_171397_ | _A/Alberta/RV3588/2014_          | _Garten_Rebecca_ |
| 3723 | 2014-11-18 | _EPI_ISL_172752_ | _A/Tanzania/3557/2014_           | _Garten_Rebecca_ |
| 3724 | 2014-11-18 | _EPI_ISL_172800_ | _A/Tanzania/3556/2014_           | _Garten_Rebecca_ |
| 3725 | 2014-11-19 | _EPI_ISL_169285_ | _A/New_Hampshire/23/2014_        | _Garten_Rebecca_ |
| 3726 | 2014-11-19 | _EPI_ISL_169290_ | _A/Louisiana/20/2014_            | _Garten_Rebecca_ |
| 3727 | 2014-11-19 | _EPI_ISL_169291_ | _A/Louisiana/22/2014_            | _Garten_Rebecca_ |
| 3728 | 2014-11-19 | _EPI_ISL_169293_ | _A/Louisiana/21/2014_            | _Garten_Rebecca_ |
| 3729 | 2014-11-19 | _EPI_ISL_169305_ | _A/New_Jersey/27/2014_           | _Garten_Rebecca_ |
| 3730 | 2014-11-19 | _EPI_ISL_169334_ | _A/Massachusetts/14/2014_        | _Garten_Rebecca_ |
| 3731 | 2014-11-19 | _EPI_ISL_169346_ | _A/Kansas/10/2014_               | _Garten_Rebecca_ |
| 3732 | 2014-11-19 | _EPI_ISL_170040_ | _A/Ohio/07/2014_                 | _Garten_Rebecca_ |
| 3733 | 2014-11-19 | _EPI_ISL_170146_ | _A/Louisiana/20/2014_            | _Garten_Rebecca_ |
| 3734 | 2014-11-19 | _EPI_ISL_170150_ | _A/New_Hampshire/23/2014_        | _Garten_Rebecca_ |
| 3735 | 2014-11-19 | _EPI_ISL_172802_ | _A/Tanzania/3559/2014_           | _Garten_Rebecca_ |
| 3736 | 2014-11-19 | _EPI_ISL_172803_ | _A/Tanzania/553/2014_            | _Garten_Rebecca_ |
| 3737 | 2014-11-19 | _EPI_ISL_173855_ | _A/Louisiana/21/2014_            | _Garten_Rebecca_ |
| 3738 | 2014-11-19 | _EPI_ISL_174137_ | _A/Tanzania/3560/2014_           | _Garten_Rebecca_ |
| 3739 | 2014-11-19 | _EPI_ISL_172231_ | _A/Louisiana/20/2014_            | _Garten_Rebecca_ |
| 3740 | 2014-11-19 | _EPI_ISL_200663_ | _A/Massachusetts/14/2014_        | _Garten_Rebecca_ |
| 3741 | 2014-11-20 | _EPI_ISL_169338_ | _A/Delaware/25/2014_             | _Garten_Rebecca_ |
| 3742 | 2014-11-20 | _EPI_ISL_169340_ | _A/Georgia/05/2014_              | _Garten_Rebecca_ |
| 3743 | 2014-11-20 | _EPI_ISL_169341_ | _A/Georgia/06/2014_              | _Garten_Rebecca_ |
| 3744 | 2014-11-20 | _EPI_ISL_169342_ | _A/Georgia/04/2014_              | _Garten_Rebecca_ |
| 3745 | 2014-11-20 | _EPI_ISL_169343_ | _A/Georgia/07/2014_              | _Garten_Rebecca_ |
| 3746 | 2014-11-20 | _EPI_ISL_169921_ | _A/Colorado/28/2014_             | _Garten_Rebecca_ |
| 3747 | 2014-11-20 | _EPI_ISL_170035_ | _A/New_Jersey/29/2014_           | _Garten_Rebecca_ |

|      |            |                  |                            |                  |
|------|------------|------------------|----------------------------|------------------|
| 3748 | 2014-11-20 | _EPI_ISL_172529_ | _A/Paraguay/3144/2014_     | _Garten_Rebecca_ |
| 3749 | 2014-11-20 | _EPI_ISL_172750_ | _A/Tanzania/3562/2014_     | _Garten_Rebecca_ |
| 3750 | 2014-11-20 | _EPI_ISL_172797_ | _A/Tanzania/3561/2014_     | _Garten_Rebecca_ |
| 3751 | 2014-11-20 | _EPI_ISL_174125_ | _A/Tanzania/3565/2014_     | _Garten_Rebecca_ |
| 3752 | 2014-11-20 | _EPI_ISL_188759_ | _A/England/525/2014_       | _Galiano_Monica_ |
| 3753 | 2014-11-20 | _EPI_ISL_188760_ | _A/England/44820080/2014_  | _Galiano_Monica_ |
| 3754 | 2014-11-20 | _EPI_ISL_188762_ | _A/England/528/2014_       | _Galiano_Monica_ |
| 3755 | 2014-11-20 | _EPI_ISL_191063_ | _A/Delaware/25/2014_       | _Garten_Rebecca_ |
| 3756 | 2014-11-20 | _EPI_ISL_192194_ | _A/ENG/44760132/2014_      | _Galiano_Monica_ |
| 3757 | 2014-11-20 | _EPI_ISL_192195_ | _A/ENG/44780079/2014_      | _Galiano_Monica_ |
| 3758 | 2014-11-21 | _EPI_ISL_170105_ | _A/Washington/33/2014_     | _Garten_Rebecca_ |
| 3759 | 2014-11-21 | _EPI_ISL_170117_ | _A/Oregon/11/2014_         | _Garten_Rebecca_ |
| 3760 | 2014-11-21 | _EPI_ISL_170129_ | _A/Washington/36/2014_     | _Garten_Rebecca_ |
| 3761 | 2014-11-21 | _EPI_ISL_176525_ | _A/Laos/732/2014_          | _Garten_Rebecca_ |
| 3762 | 2014-11-21 | _EPI_ISL_176864_ | _A/Nagasaki/14N012/2014_   | _Hiroki_Kondo_   |
| 3763 | 2014-11-21 | _EPI_ISL_188763_ | _A/England/44840067/2014_  | _Galiano_Monica_ |
| 3764 | 2014-11-21 | _EPI_ISL_188764_ | _A/England/529/2014_       | _Galiano_Monica_ |
| 3765 | 2014-11-21 | _EPI_ISL_188765_ | _A/England/44840069/2014_  | _Galiano_Monica_ |
| 3766 | 2014-11-21 | _EPI_ISL_188766_ | _A/England/44860850/2014_  | _Galiano_Monica_ |
| 3767 | 2014-11-21 | _EPI_ISL_191060_ | _A/Laos/732/2014_          | _Garten_Rebecca_ |
| 3768 | 2014-11-21 | _EPI_ISL_172766_ | _A/Alberta/RV3591/2014_    | _Garten_Rebecca_ |
| 3769 | 2014-11-21 | _EPI_ISL_193361_ | _A/Washington/33/2014_     | _Garten_Rebecca_ |
| 3770 | 2014-11-22 | _EPI_ISL_170029_ | _A/Ohio/08/2014_           | _Garten_Rebecca_ |
| 3771 | 2014-11-22 | _EPI_ISL_191424_ | _A/Wisconsin/64/2014_      | _Garten_Rebecca_ |
| 3772 | 2014-11-23 | _EPI_ISL_169948_ | _A/Minnesota/36/2014_      | _Garten_Rebecca_ |
| 3773 | 2014-11-23 | _EPI_ISL_172547_ | _A/Minnesota/41/2014_      | _Garten_Rebecca_ |
| 3774 | 2014-11-24 | _EPI_ISL_169907_ | _A/Louisiana/28/2014_      | _Garten_Rebecca_ |
| 3775 | 2014-11-24 | _EPI_ISL_169932_ | _A/Texas/69/2014_          | _Garten_Rebecca_ |
| 3776 | 2014-11-24 | _EPI_ISL_169940_ | _A/Oklahoma/10/2014_       | _Garten_Rebecca_ |
| 3777 | 2014-11-24 | _EPI_ISL_170020_ | _A/Wyoming/17/2014_        | _Garten_Rebecca_ |
| 3778 | 2014-11-24 | _EPI_ISL_170022_ | _A/Texas/70/2014_          | _Garten_Rebecca_ |
| 3779 | 2014-11-24 | _EPI_ISL_170038_ | _A/Texas/68/2014_          | _Garten_Rebecca_ |
| 3780 | 2014-11-24 | _EPI_ISL_170041_ | _A/Oklahoma/09/2014_       | _Garten_Rebecca_ |
| 3781 | 2014-11-24 | _EPI_ISL_172734_ | _A/Mexico/2777/2014_       | _Garten_Rebecca_ |
| 3782 | 2014-11-24 | _EPI_ISL_172755_ | _A/Tanzania/562/2014_      | _Garten_Rebecca_ |
| 3783 | 2014-11-24 | _EPI_ISL_174126_ | _A/Tanzania/3576/2014_     | _Garten_Rebecca_ |
| 3784 | 2014-11-24 | _EPI_ISL_174127_ | _A/Tanzania/3577/2014_     | _Garten_Rebecca_ |
| 3785 | 2014-11-24 | _EPI_ISL_188761_ | _A/England/44840003/2014_  | _Galiano_Monica_ |
| 3786 | 2014-11-25 | _EPI_ISL_169335_ | _A/Texas/57/2014_          | _Garten_Rebecca_ |
| 3787 | 2014-11-25 | _EPI_ISL_169938_ | _A/Texas/56/2014_          | _Garten_Rebecca_ |
| 3788 | 2014-11-25 | _EPI_ISL_169945_ | _A/Idaho/07/2014_          | _Garten_Rebecca_ |
| 3789 | 2014-11-25 | _EPI_ISL_170023_ | _A/Mississippi/15/2014_    | _Garten_Rebecca_ |
| 3790 | 2014-11-25 | _EPI_ISL_170049_ | _A/Maryland/40/2014_       | _Garten_Rebecca_ |
| 3791 | 2014-11-25 | _EPI_ISL_170085_ | _A/FUKUSHIMA/103/2014_     | _Takashita_Emi_  |
| 3792 | 2014-11-25 | _EPI_ISL_170118_ | _A/Michigan/26/2014_       | _Garten_Rebecca_ |
| 3793 | 2014-11-25 | _EPI_ISL_171385_ | _A/Virginia/36/2014_       | _Garten_Rebecca_ |
| 3794 | 2014-11-25 | _EPI_ISL_172784_ | _A/Tanzania/2665/2014_     | _Garten_Rebecca_ |
| 3795 | 2014-11-25 | _EPI_ISL_177524_ | _A/Virginia/26/2014_       | _Garten_Rebecca_ |
| 3796 | 2014-11-26 | _EPI_ISL_169839_ | _A/Stockholm/31/2014_      | _Brytting_Maria_ |
| 3797 | 2014-11-26 | _EPI_ISL_169947_ | _A/Kentucky/14/2014_       | _Garten_Rebecca_ |
| 3798 | 2014-11-26 | _EPI_ISL_171367_ | _A/Georgia/23/2014_        | _Garten_Rebecca_ |
| 3799 | 2014-11-26 | _EPI_ISL_172731_ | _A/Mexico/2789/2014_       | _Garten_Rebecca_ |
| 3800 | 2014-11-26 | _EPI_ISL_172737_ | _A/Tanzania/3580/2014_     | _Garten_Rebecca_ |
| 3801 | 2014-11-26 | _EPI_ISL_188769_ | _A/England/530/2014_       | _Galiano_Monica_ |
| 3802 | 2014-11-26 | _EPI_ISL_188790_ | _A/England/45100197/2014_  | _Galiano_Monica_ |
| 3803 | 2014-11-27 | _EPI_ISL_170048_ | _A/Indiana/21/2014_        | _Garten_Rebecca_ |
| 3804 | 2014-11-27 | _EPI_ISL_171362_ | _A/Georgia/16/2014_        | _Garten_Rebecca_ |
| 3805 | 2014-11-27 | _EPI_ISL_172531_ | _A/Ethiopia/155/2014_      | _Garten_Rebecca_ |
| 3806 | 2014-11-27 | _EPI_ISL_188776_ | _A/England/45000028/2014_  | _Galiano_Monica_ |
| 3807 | 2014-11-28 | _EPI_ISL_169259_ | _A/Malmoe/5/2014_          | _Brytting_Maria_ |
| 3808 | 2014-11-28 | _EPI_ISL_169912_ | _A/Pennsylvania/47/2014_   | _Garten_Rebecca_ |
| 3809 | 2014-11-28 | _EPI_ISL_169926_ | _A/New_Hampshire/28/2014_  | _Garten_Rebecca_ |
| 3810 | 2014-11-28 | _EPI_ISL_169944_ | _A/New_Mexico/30/2014_     | _Garten_Rebecca_ |
| 3811 | 2014-11-28 | _EPI_ISL_170014_ | _A/Pennsylvania/48/2014_   | _Garten_Rebecca_ |
| 3812 | 2014-11-28 | _EPI_ISL_170039_ | _A/Pennsylvania/49/2014_   | _Garten_Rebecca_ |
| 3813 | 2014-11-28 | _EPI_ISL_188768_ | _A/England/44920021/2014_  | _Galiano_Monica_ |
| 3814 | 2014-11-29 | _EPI_ISL_169919_ | _A/Minnesota/35/2014_      | _Garten_Rebecca_ |
| 3815 | 2014-11-29 | _EPI_ISL_171366_ | _A/Georgia/18/2014_        | _Garten_Rebecca_ |
| 3816 | 2014-11-29 | _EPI_ISL_172555_ | _A/Hong_Kong/7617/2014_    | _Garten_Rebecca_ |
| 3817 | 2014-11-29 | _EPI_ISL_172736_ | _A/Colorado/39/2014_       | _Garten_Rebecca_ |
| 3818 | 2014-11-29 | _EPI_ISL_172769_ | _A/Hong_Kong/7615/2014_    | _Garten_Rebecca_ |
| 3819 | 2014-11-29 | _EPI_ISL_191030_ | _A/Kazakhstan/194/2014_    | _Garten_Rebecca_ |
| 3820 | 2014-11-30 | _EPI_ISL_169902_ | _A/Rhode_Island/21/2014_   | _Garten_Rebecca_ |
| 3821 | 2014-11-30 | _EPI_ISL_169906_ | _A/Massachusetts/18/2014_  | _Garten_Rebecca_ |
| 3822 | 2014-12-01 | _EPI_ISL_169816_ | _A/Astrakhan/R1123/2014_   | _Fadeev_Artem_   |
| 3823 | 2014-12-01 | _EPI_ISL_169914_ | _A/Missouri/13/2014_       | _Garten_Rebecca_ |
| 3824 | 2014-12-01 | _EPI_ISL_170033_ | _A/Washington/35/2014_     | _Garten_Rebecca_ |
| 3825 | 2014-12-01 | _EPI_ISL_170122_ | _A/Illinois/09/2014_       | _Garten_Rebecca_ |
| 3826 | 2014-12-01 | _EPI_ISL_170134_ | _A/Florida/76/2014_        | _Garten_Rebecca_ |
| 3827 | 2014-12-01 | _EPI_ISL_170693_ | _A/New_Hampshire/30/2014_  | _Garten_Rebecca_ |
| 3828 | 2014-12-01 | _EPI_ISL_171841_ | _A/Pennsylvania/56/2014_   | _Garten_Rebecca_ |
| 3829 | 2014-12-01 | _EPI_ISL_171860_ | _A/NAGANO/3652/2014_       | _Takashita_Emi_  |
| 3830 | 2014-12-01 | _EPI_ISL_172533_ | _A/Indiana/24/2014_        | _Garten_Rebecca_ |
| 3831 | 2014-12-01 | _EPI_ISL_172538_ | _A/Kentucky/30/2014_       | _Garten_Rebecca_ |
| 3832 | 2014-12-01 | _EPI_ISL_172785_ | _A/Tanzania/588/2014_      | _Garten_Rebecca_ |
| 3833 | 2014-12-01 | _EPI_ISL_172790_ | _A/Mexico/2865/2014_       | _Garten_Rebecca_ |
| 3834 | 2014-12-01 | _EPI_ISL_173080_ | _A/MIYAGI/52/2014_         | _Takashita_Emi_  |
| 3835 | 2014-12-01 | _EPI_ISL_175230_ | _A/Georgia/24/2014_        | _Garten_Rebecca_ |
| 3836 | 2014-12-01 | _EPI_ISL_188774_ | _A/England/45000025/2014_  | _Galiano_Monica_ |
| 3837 | 2014-12-01 | _EPI_ISL_188775_ | _A/England/533/2014_       | _Galiano_Monica_ |
| 3838 | 2014-12-01 | _EPI_ISL_188871_ | _A/Tanzania/587/2014_      | _Garten_Rebecca_ |
| 3839 | 2014-12-02 | _EPI_ISL_169258_ | _A/Stockholm/28/2014_      | _Brytting_Maria_ |
| 3840 | 2014-12-02 | _EPI_ISL_169908_ | _A/Massachusetts/17/2014_  | _Garten_Rebecca_ |
| 3841 | 2014-12-02 | _EPI_ISL_169924_ | _A/Wisconsin/53/2014_      | _Garten_Rebecca_ |
| 3842 | 2014-12-02 | _EPI_ISL_169939_ | _A/North_Dakota/11/2014_   | _Garten_Rebecca_ |
| 3843 | 2014-12-02 | _EPI_ISL_170026_ | _A/Wisconsin/52/2014_      | _Garten_Rebecca_ |
| 3844 | 2014-12-02 | _EPI_ISL_170031_ | _A/Kentucky/15/2014_       | _Garten_Rebecca_ |
| 3845 | 2014-12-02 | _EPI_ISL_170045_ | _A/Nevada/21/2014_         | _Garten_Rebecca_ |
| 3846 | 2014-12-02 | _EPI_ISL_170107_ | _A/Massachusetts/19/2014_  | _Garten_Rebecca_ |
| 3847 | 2014-12-02 | _EPI_ISL_170695_ | _A/Texas/80/2014_          | _Garten_Rebecca_ |
| 3848 | 2014-12-02 | _EPI_ISL_170717_ | _A/Utah/33/2014_           | _Garten_Rebecca_ |
| 3849 | 2014-12-02 | _EPI_ISL_170727_ | _A/Texas/75/2014_          | _Garten_Rebecca_ |
| 3850 | 2014-12-02 | _EPI_ISL_170737_ | _A/Pennsylvania/52/2014_   | _Garten_Rebecca_ |
| 3851 | 2014-12-02 | _EPI_ISL_172563_ | _A/Illinois/11/2014_       | _Garten_Rebecca_ |
| 3852 | 2014-12-02 | _EPI_ISL_172595_ | _A/Georgia/21/2014_        | _Garten_Rebecca_ |
| 3853 | 2014-12-02 | _EPI_ISL_172598_ | _A/Missouri/14/2014_       | _Garten_Rebecca_ |
| 3854 | 2014-12-02 | _EPI_ISL_172610_ | _A/Pennsylvania/51/2014_   | _Garten_Rebecca_ |
| 3855 | 2014-12-02 | _EPI_ISL_172786_ | _A/Mexico/836/2014_        | _Garten_Rebecca_ |
| 3856 | 2014-12-02 | _EPI_ISL_172544_ | _A/Delaware/38/2014_       | _Garten_Rebecca_ |
| 3857 | 2014-12-02 | _EPI_ISL_175184_ | _A/Tennessee/24/2014_      | _Garten_Rebecca_ |
| 3858 | 2014-12-02 | _EPI_ISL_188770_ | _A/England/44940038/2014_  | _Galiano_Monica_ |
| 3859 | 2014-12-03 | _EPI_ISL_170046_ | _A/Massachusetts/16/2014_  | _Garten_Rebecca_ |
| 3860 | 2014-12-03 | _EPI_ISL_170706_ | _A/North_Dakota/14/2014_   | _Garten_Rebecca_ |
| 3861 | 2014-12-03 | _EPI_ISL_171354_ | _A/Georgia/20/2014_        | _Garten_Rebecca_ |
| 3862 | 2014-12-03 | _EPI_ISL_172520_ | _A/Colorado/38/2014_       | _Garten_Rebecca_ |
| 3863 | 2014-12-03 | _EPI_ISL_172551_ | _A/North_Carolina/41/2014_ | _Garten_Rebecca_ |
| 3864 | 2014-12-03 | _EPI_ISL_172741_ | _A/Florida/85/2014_        | _Garten_Rebecca_ |
| 3865 | 2014-12-03 | _EPI_ISL_172776_ | _A/Tanzania/590/2014_      | _Garten_Rebecca_ |
| 3866 | 2014-12-03 | _EPI_ISL_172787_ | _A/Tanzania/3588/2014_     | _Garten_Rebecca_ |
| 3867 | 2014-12-03 | _EPI_ISL_172789_ | _A/Tanzania/3589/2014_     | _Garten_Rebecca_ |
| 3868 | 2014-12-03 | _EPI_ISL_172541_ | _A/Illinois/12/2014_       | _Garten_Rebecca_ |

|      |            |                  |                            |                  |
|------|------------|------------------|----------------------------|------------------|
| 3869 | 2014-12-03 | _EPI_ISL_188773_ | _A/England/45000010/2014_  | _Galiano_Monica_ |
| 3870 | 2014-12-03 | _EPI_ISL_188883_ | _A/Georgia/28/2014_        | _Garten_Rebecca_ |
| 3871 | 2014-12-03 | _EPI_ISL_175221_ | _A/Chita/266/2014_         | _Garten_Rebecca_ |
| 3872 | 2014-12-04 | _EPI_ISL_169261_ | _A/Sweden/75/2014_         | _Brytting_Maria_ |
| 3873 | 2014-12-04 | _EPI_ISL_169838_ | _A/Stockholm/30/2014_      | _Brytting_Maria_ |
| 3874 | 2014-12-04 | _EPI_ISL_169904_ | _A/North_Dakota/10/2014_   | _Garten_Rebecca_ |
| 3875 | 2014-12-04 | _EPI_ISL_170044_ | _A/Nevada/22/2014_         | _Garten_Rebecca_ |
| 3876 | 2014-12-04 | _EPI_ISL_170446_ | _A/TOKYO/41724/2014_       | _Takashita_Emi_  |
| 3877 | 2014-12-04 | _EPI_ISL_170682_ | _A/Nevada/24/2014_         | _Garten_Rebecca_ |
| 3878 | 2014-12-04 | _EPI_ISL_170688_ | _A/California/42/2014_     | _Garten_Rebecca_ |
| 3879 | 2014-12-04 | _EPI_ISL_170720_ | _A/Alabama/10/2014_        | _Garten_Rebecca_ |
| 3880 | 2014-12-04 | _EPI_ISL_170724_ | _A/Ohio/09/2014_           | _Garten_Rebecca_ |
| 3881 | 2014-12-04 | _EPI_ISL_170739_ | _A/California/44/2014_     | _Garten_Rebecca_ |
| 3882 | 2014-12-04 | _EPI_ISL_171368_ | _A/Mexico/2971/2014_       | _Garten_Rebecca_ |
| 3883 | 2014-12-04 | _EPI_ISL_172536_ | _A/Tennessee/23/2014_      | _Garten_Rebecca_ |
| 3884 | 2014-12-04 | _EPI_ISL_172545_ | _A/Missouri/17/2014_       | _Garten_Rebecca_ |
| 3885 | 2014-12-04 | _EPI_ISL_172585_ | _A/North_Carolina/40/2014_ | _Garten_Rebecca_ |
| 3886 | 2014-12-04 | _EPI_ISL_172589_ | _A/New_Hampshire/29/2014_  | _Garten_Rebecca_ |
| 3887 | 2014-12-04 | _EPI_ISL_172771_ | _A/Paraguay/4413/2014_     | _Garten_Rebecca_ |
| 3888 | 2014-12-04 | _EPI_ISL_172775_ | _A/Pennsylvania/67/2014_   | _Garten_Rebecca_ |
| 3889 | 2014-12-04 | _EPI_ISL_172542_ | _A/Minnesota/39/2014_      | _Garten_Rebecca_ |
| 3890 | 2014-12-04 | _EPI_ISL_175211_ | _A/Congo/2458/2014_        | _Garten_Rebecca_ |
| 3891 | 2014-12-04 | _EPI_ISL_188771_ | _A/England/45000006/2014_  | _Galiano_Monica_ |
| 3892 | 2014-12-05 | _EPI_ISL_170043_ | _A/Florida/65/2014_        | _Garten_Rebecca_ |
| 3893 | 2014-12-05 | _EPI_ISL_170108_ | _A/Nebraska/15/2014_       | _Garten_Rebecca_ |
| 3894 | 2014-12-05 | _EPI_ISL_170698_ | _A/Utah/27/2014_           | _Garten_Rebecca_ |
| 3895 | 2014-12-05 | _EPI_ISL_170705_ | _A/Utah/34/2014_           | _Garten_Rebecca_ |
| 3896 | 2014-12-05 | _EPI_ISL_170729_ | _A/Indiana/25/2014_        | _Garten_Rebecca_ |
| 3897 | 2014-12-05 | _EPI_ISL_172594_ | _A/Virginia/37/2014_       | _Garten_Rebecca_ |
| 3898 | 2014-12-05 | _EPI_ISL_172773_ | _A/Tanzania/594/2014_      | _Garten_Rebecca_ |
| 3899 | 2014-12-05 | _EPI_ISL_172774_ | _A/Tanzania/596/2014_      | _Garten_Rebecca_ |
| 3900 | 2014-12-05 | _EPI_ISL_172799_ | _A/Tanzania/597/2014_      | _Garten_Rebecca_ |
| 3901 | 2014-12-05 | _EPI_ISL_172834_ | _A/Texas/88/2014_          | _Garten_Rebecca_ |
| 3902 | 2014-12-05 | _EPI_ISL_188772_ | _A/England/45000008/2014_  | _Galiano_Monica_ |
| 3903 | 2014-12-06 | _EPI_ISL_170738_ | _A/Louisiana/38/2014_      | _Garten_Rebecca_ |
| 3904 | 2014-12-06 | _EPI_ISL_172777_ | _A/Tanzania/599/2014_      | _Garten_Rebecca_ |
| 3905 | 2014-12-06 | _EPI_ISL_177421_ | _A/WAKAYAMA-C/104/2014_    | _Takashita_Emi_  |
| 3906 | 2014-12-06 | _EPI_ISL_188867_ | _A/Georgia/29/2014_        | _Garten_Rebecca_ |
| 3907 | 2014-12-07 | _EPI_ISL_169942_ | _A/Delaware/31/2014_       | _Garten_Rebecca_ |
| 3908 | 2014-12-07 | _EPI_ISL_170674_ | _A/Texas/89/2014_          | _Garten_Rebecca_ |
| 3909 | 2014-12-07 | _EPI_ISL_170702_ | _A/Delaware/35/2014_       | _Garten_Rebecca_ |
| 3910 | 2014-12-07 | _EPI_ISL_170719_ | _A/Utah/35/2014_           | _Garten_Rebecca_ |
| 3911 | 2014-12-07 | _EPI_ISL_171398_ | _A/Ontario/RV3606/2014_    | _Garten_Rebecca_ |
| 3912 | 2014-12-07 | _EPI_ISL_172504_ | _A/Minnesota/38/2014_      | _Garten_Rebecca_ |
| 3913 | 2014-12-07 | _EPI_ISL_173084_ | _A/FUKUI/61/2014_          | _Takashita_Emi_  |
| 3914 | 2014-12-08 | _EPI_ISL_169917_ | _A/Wisconsin/55/2014_      | _Garten_Rebecca_ |
| 3915 | 2014-12-08 | _EPI_ISL_169918_ | _A/Washington/37/2014_     | _Garten_Rebecca_ |
| 3916 | 2014-12-08 | _EPI_ISL_169920_ | _A/Wisconsin/54/2014_      | _Garten_Rebecca_ |
| 3917 | 2014-12-08 | _EPI_ISL_169931_ | _A/Kansas/12/2014_         | _Garten_Rebecca_ |
| 3918 | 2014-12-08 | _EPI_ISL_169935_ | _A/Florida/66/2014_        | _Garten_Rebecca_ |
| 3919 | 2014-12-08 | _EPI_ISL_170016_ | _A/Mississippi/16/2014_    | _Garten_Rebecca_ |
| 3920 | 2014-12-08 | _EPI_ISL_170037_ | _A/Rhode_Island/22/2014_   | _Garten_Rebecca_ |
| 3921 | 2014-12-08 | _EPI_ISL_170675_ | _A/Texas/72/2014_          | _Garten_Rebecca_ |
| 3922 | 2014-12-08 | _EPI_ISL_170677_ | _A/Arkansas/14/2014_       | _Garten_Rebecca_ |
| 3923 | 2014-12-08 | _EPI_ISL_170683_ | _A/Texas/73/2014_          | _Garten_Rebecca_ |
| 3924 | 2014-12-08 | _EPI_ISL_170687_ | _A/Texas/74/2014_          | _Garten_Rebecca_ |
| 3925 | 2014-12-08 | _EPI_ISL_170712_ | _A/Virginia/33/2014_       | _Garten_Rebecca_ |
| 3926 | 2014-12-08 | _EPI_ISL_170714_ | _A/Mississippi/19/2014_    | _Garten_Rebecca_ |
| 3927 | 2014-12-08 | _EPI_ISL_170716_ | _A/Tennessee/16/2014_      | _Garten_Rebecca_ |
| 3928 | 2014-12-08 | _EPI_ISL_170718_ | _A/Tennessee/17/2014_      | _Garten_Rebecca_ |
| 3929 | 2014-12-08 | _EPI_ISL_170723_ | _A/Alabama/11/2014_        | _Garten_Rebecca_ |
| 3930 | 2014-12-08 | _EPI_ISL_170731_ | _A/Texas/71/2014_          | _Garten_Rebecca_ |
| 3931 | 2014-12-08 | _EPI_ISL_170734_ | _A/Montana/26/2014_        | _Garten_Rebecca_ |
| 3932 | 2014-12-08 | _EPI_ISL_171373_ | _A/Mexico/2974/2014_       | _Garten_Rebecca_ |
| 3933 | 2014-12-08 | _EPI_ISL_172556_ | _A/Indiana/26/2014_        | _Garten_Rebecca_ |
| 3934 | 2014-12-08 | _EPI_ISL_172565_ | _A/New_Hampshire/32/2014_  | _Garten_Rebecca_ |
| 3935 | 2014-12-08 | _EPI_ISL_175205_ | _A/Tanzania/3591/2014_     | _Garten_Rebecca_ |
| 3936 | 2014-12-08 | _EPI_ISL_175215_ | _A/Georgia/30/2014_        | _Garten_Rebecca_ |
| 3937 | 2014-12-08 | _EPI_ISL_175217_ | _A/Congo/2461/2014_        | _Garten_Rebecca_ |
| 3938 | 2014-12-08 | _EPI_ISL_176317_ | _A/Kyoto/14K001/2014_      | _Hiroki_Kondo_   |
| 3939 | 2014-12-08 | _EPI_ISL_176318_ | _A/Kyoto/14K002/2014_      | _Hiroki_Kondo_   |
| 3940 | 2014-12-08 | _EPI_ISL_177531_ | _A/Tennessee/25/2014_      | _Garten_Rebecca_ |
| 3941 | 2014-12-08 | _EPI_ISL_188780_ | _A/England/536/2014_       | _Galiano_Monica_ |
| 3942 | 2014-12-08 | _EPI_ISL_188785_ | _A/England/45080202/2014_  | _Galiano_Monica_ |
| 3943 | 2014-12-08 | _EPI_ISL_188786_ | _A/England/45080206/2014_  | _Galiano_Monica_ |
| 3944 | 2014-12-09 | _EPI_ISL_169909_ | _A/Wisconsin/57/2014_      | _Garten_Rebecca_ |
| 3945 | 2014-12-09 | _EPI_ISL_169910_ | _A/Wisconsin/59/2014_      | _Garten_Rebecca_ |
| 3946 | 2014-12-09 | _EPI_ISL_169911_ | _A/Wisconsin/58/2014_      | _Garten_Rebecca_ |
| 3947 | 2014-12-09 | _EPI_ISL_169916_ | _A/Wisconsin/56/2014_      | _Garten_Rebecca_ |
| 3948 | 2014-12-09 | _EPI_ISL_170691_ | _A/Ohio/10/2014_           | _Garten_Rebecca_ |
| 3949 | 2014-12-09 | _EPI_ISL_170704_ | _A/Tennessee/18/2014_      | _Garten_Rebecca_ |
| 3950 | 2014-12-09 | _EPI_ISL_170711_ | _A/Alabama/12/2014_        | _Garten_Rebecca_ |
| 3951 | 2014-12-09 | _EPI_ISL_170721_ | _A/Tennessee/15/2014_      | _Garten_Rebecca_ |
| 3952 | 2014-12-09 | _EPI_ISL_170722_ | _A/Montana/27/2014_        | _Garten_Rebecca_ |
| 3953 | 2014-12-09 | _EPI_ISL_170726_ | _A/Mississippi/20/2014_    | _Garten_Rebecca_ |
| 3954 | 2014-12-09 | _EPI_ISL_170741_ | _A/Virginia/29/2014_       | _Garten_Rebecca_ |
| 3955 | 2014-12-09 | _EPI_ISL_170742_ | _A/Arkansas/15/2014_       | _Garten_Rebecca_ |
| 3956 | 2014-12-09 | _EPI_ISL_172522_ | _A/Wyoming/18/2014_        | _Garten_Rebecca_ |
| 3957 | 2014-12-09 | _EPI_ISL_172554_ | _A/Wyoming/20/2014_        | _Garten_Rebecca_ |
| 3958 | 2014-12-09 | _EPI_ISL_172588_ | _A/Pennsylvania/65/2014_   | _Garten_Rebecca_ |
| 3959 | 2014-12-09 | _EPI_ISL_172791_ | _A/Mexico/3005/2014_       | _Garten_Rebecca_ |
| 3960 | 2014-12-09 | _EPI_ISL_172810_ | _A/Nonthaburi/2421/2014_   | _Garten_Rebecca_ |
| 3961 | 2014-12-09 | _EPI_ISL_172814_ | _A/Tanzania/1906/2014_     | _Garten_Rebecca_ |
| 3962 | 2014-12-09 | _EPI_ISL_175210_ | _A/Congo/2471/2014_        | _Garten_Rebecca_ |
| 3963 | 2014-12-09 | _EPI_ISL_176319_ | _A/Kyoto/14K003/2014_      | _Hiroki_Kondo_   |
| 3964 | 2014-12-09 | _EPI_ISL_176320_ | _A/Kyoto/14K005/2014_      | _Hiroki_Kondo_   |
| 3965 | 2014-12-09 | _EPI_ISL_176865_ | _A/Nagasaki/14N013/2014_   | _Hiroki_Kondo_   |
| 3966 | 2014-12-09 | _EPI_ISL_177535_ | _A/Virginia/42/2014_       | _Garten_Rebecca_ |
| 3967 | 2014-12-09 | _EPI_ISL_177543_ | _A/Washington/61/2014_     | _Garten_Rebecca_ |
| 3968 | 2014-12-09 | _EPI_ISL_188777_ | _A/England/45040065/2014_  | _Galiano_Monica_ |
| 3969 | 2014-12-09 | _EPI_ISL_188781_ | _A/England/45080158/2014_  | _Galiano_Monica_ |
| 3970 | 2014-12-10 | _EPI_ISL_169915_ | _A/Wisconsin/60/2014_      | _Garten_Rebecca_ |
| 3971 | 2014-12-10 | _EPI_ISL_170110_ | _A/California/40/2014_     | _Garten_Rebecca_ |
| 3972 | 2014-12-10 | _EPI_ISL_170709_ | _A/Texas/81/2014_          | _Garten_Rebecca_ |
| 3973 | 2014-12-10 | _EPI_ISL_170713_ | _A/Missouri/16/2014_       | _Garten_Rebecca_ |
| 3974 | 2014-12-10 | _EPI_ISL_170725_ | _A/Wyoming/19/2014_        | _Garten_Rebecca_ |
| 3975 | 2014-12-10 | _EPI_ISL_170730_ | _A/Virginia/32/2014_       | _Garten_Rebecca_ |
| 3976 | 2014-12-10 | _EPI_ISL_171384_ | _A/Missouri/18/2014_       | _Garten_Rebecca_ |
| 3977 | 2014-12-10 | _EPI_ISL_172509_ | _A/Maryland/44/2014_       | _Garten_Rebecca_ |
| 3978 | 2014-12-10 | _EPI_ISL_175209_ | _A/Chita/268/2014_         | _Garten_Rebecca_ |
| 3979 | 2014-12-10 | _EPI_ISL_188782_ | _A/England/45080193/2014_  | _Galiano_Monica_ |
| 3980 | 2014-12-10 | _EPI_ISL_188783_ | _A/England/45080198/2014_  | _Galiano_Monica_ |
| 3981 | 2014-12-10 | _EPI_ISL_188788_ | _A/England/45100191/2014_  | _Galiano_Monica_ |
| 3982 | 2014-12-10 | _EPI_ISL_188869_ | _A/Louisiana/39/2014_      | _Garten_Rebecca_ |
| 3983 | 2014-12-11 | _EPI_ISL_170113_ | _A/Nebraska/14/2014_       | _Garten_Rebecca_ |
| 3984 | 2014-12-11 | _EPI_ISL_170125_ | _A/Virginia/30/2014_       | _Garten_Rebecca_ |
| 3985 | 2014-12-11 | _EPI_ISL_170133_ | _A/Florida/73/2014_        | _Garten_Rebecca_ |
| 3986 | 2014-12-11 | _EPI_ISL_170136_ | _A/Virginia/31/2014_       | _Garten_Rebecca_ |
| 3987 | 2014-12-11 | _EPI_ISL_170692_ | _A/Vermont/12/2014_        | _Garten_Rebecca_ |
| 3988 | 2014-12-11 | _EPI_ISL_170708_ | _A/Texas/82/2014_          | _Garten_Rebecca_ |
| 3989 | 2014-12-11 | _EPI_ISL_171390_ | _A/Manitoba/RV3623/2014_   | _Garten_Rebecca_ |

|                 |                 |                                 |                 |
|-----------------|-----------------|---------------------------------|-----------------|
| 3990 2014-12-11 | _EPI_ISL_172590 | _A/Pennsylvania/64/2014         | _Garten_Rebecca |
| 3991 2014-12-11 | _EPI_ISL_172811 | _A/Tanzania/3594/2014           | _Garten_Rebecca |
| 3992 2014-12-11 | _EPI_ISL_172813 | _A/Chanthaburi/2419/2014        | _Garten_Rebecca |
| 3993 2014-12-11 | _EPI_ISL_172832 | _A/Texas/85/2014                | _Garten_Rebecca |
| 3994 2014-12-11 | _EPI_ISL_172833 | _A/Texas/84/2014                | _Garten_Rebecca |
| 3995 2014-12-11 | _EPI_ISL_172500 | _A/Massachusetts/25/2014        | _Garten_Rebecca |
| 3996 2014-12-11 | _EPI_ISL_170715 | _A/Virginia/34/2014             | _Garten_Rebecca |
| 3997 2014-12-11 | _EPI_ISL_175194 | _A/Cambodia/1370/2014           | _Garten_Rebecca |
| 3998 2014-12-11 | _EPI_ISL_175195 | _A/Cambodia/1372/2014           | _Garten_Rebecca |
| 3999 2014-12-11 | _EPI_ISL_175201 | _A/Chita/256/2014               | _Garten_Rebecca |
| 4000 2014-12-11 | _EPI_ISL_175202 | _A/Tanzania/3595/2014           | _Garten_Rebecca |
| 4001 2014-12-11 | _EPI_ISL_188784 | _A/England/45080199/2014        | Galiano_Monica  |
| 4002 2014-12-11 | _EPI_ISL_188787 | _A/England/45100189/2014        | Galiano_Monica  |
| 4003 2014-12-11 | _EPI_ISL_189842 | _A/Congo/2495/2014              | _Garten_Rebecca |
| 4004 2014-12-12 | _EPI_ISL_170699 | _A/Nevada/26/2014               | _Garten_Rebecca |
| 4005 2014-12-12 | _EPI_ISL_172501 | _A/Maryland/45/2014             | _Garten_Rebecca |
| 4006 2014-12-12 | _EPI_ISL_172558 | _A/Colorado/35/2014             | _Garten_Rebecca |
| 4007 2014-12-12 | _EPI_ISL_172561 | _A/Montana/28/2014              | _Garten_Rebecca |
| 4008 2014-12-12 | _EPI_ISL_172788 | _A/Tanzania/609/2014            | _Garten_Rebecca |
| 4009 2014-12-12 | _EPI_ISL_172953 | _A/Stockholm/39/2014            | Brytting_Maria  |
| 4010 2014-12-12 | _EPI_ISL_173236 | _A/Michigan/27/2014             | _Garten_Rebecca |
| 4011 2014-12-12 | _EPI_ISL_175203 | _A/Chita/260/2014               | _Garten_Rebecca |
| 4012 2014-12-12 | _EPI_ISL_175208 | _A/Chita/264/2014               | _Garten_Rebecca |
| 4013 2014-12-12 | _EPI_ISL_175222 | _A/Tomsk/254/2014               | _Garten_Rebecca |
| 4014 2014-12-12 | _EPI_ISL_176327 | _A/Nagasaki/14N014/2014         | Hiroki_Kondo    |
| 4015 2014-12-12 | _EPI_ISL_188793 | _A/England/45140006/2014        | Galiano_Monica  |
| 4016 2014-12-12 | _EPI_ISL_192202 | _A/ENG/542/2014                 | Galiano_Monica  |
| 4017 2014-12-12 | _EPI_ISL_197499 | _A/Gifu/46/2014                 | _Garten_Rebecca |
| 4018 2014-12-12 | _EPI_ISL_197540 | _A/Gifu/46/2014                 | _Garten_Rebecca |
| 4019 2014-12-13 | _EPI_ISL_170112 | _A/Vermont/10/2014              | _Garten_Rebecca |
| 4020 2014-12-13 | _EPI_ISL_171389 | _A/Pennsylvania/54/2014         | _Garten_Rebecca |
| 4021 2014-12-13 | _EPI_ISL_172591 | _A/Pennsylvania/63/2014         | _Garten_Rebecca |
| 4022 2014-12-14 | _EPI_ISL_170109 | _A/Vermont/09/2014              | _Garten_Rebecca |
| 4023 2014-12-14 | _EPI_ISL_172571 | _A/West_Virginia/06/2014        | _Garten_Rebecca |
| 4024 2014-12-14 | _EPI_ISL_172503 | _A/Massachusetts/23/2014        | _Garten_Rebecca |
| 4025 2014-12-15 | _EPI_ISL_170680 | _A/Texas/79/2014                | _Garten_Rebecca |
| 4026 2014-12-15 | _EPI_ISL_170710 | _A/Nevada/25/2014               | _Garten_Rebecca |
| 4027 2014-12-15 | _EPI_ISL_171372 | _A/Busan/1996/2014              | _Garten_Rebecca |
| 4028 2014-12-15 | _EPI_ISL_171383 | _A/Hawaii/63/2014               | _Garten_Rebecca |
| 4029 2014-12-15 | _EPI_ISL_172518 | _A/Hawaii/63/2014               | _Garten_Rebecca |
| 4030 2014-12-15 | _EPI_ISL_172550 | _A/Tennessee/20/2014            | _Garten_Rebecca |
| 4031 2014-12-15 | _EPI_ISL_172756 | _A/Washington/52/2014           | _Garten_Rebecca |
| 4032 2014-12-15 | _EPI_ISL_173249 | _A/Texas/107/2014               | _Garten_Rebecca |
| 4033 2014-12-15 | _EPI_ISL_175204 | _A/Chita/258/2014               | _Garten_Rebecca |
| 4034 2014-12-15 | _EPI_ISL_176321 | _A/Kyoto/14K007/2014            | Hiroki_Kondo    |
| 4035 2014-12-15 | _EPI_ISL_176328 | _A/Nagasaki/14N015/2014         | Hiroki_Kondo    |
| 4036 2014-12-15 | _EPI_ISL_188792 | _A/England/45140005/2014        | Galiano_Monica  |
| 4037 2014-12-15 | _EPI_ISL_188797 | _A/England/601/2014             | Galiano_Monica  |
| 4038 2014-12-15 | _EPI_ISL_188875 | _A/Vietnam/629/2014             | _Garten_Rebecca |
| 4039 2014-12-15 | _EPI_ISL_188890 | _A/Georgia/45/2014              | _Garten_Rebecca |
| 4040 2014-12-15 | _EPI_ISL_191693 | _A/Congo/2526/2014              | _Garten_Rebecca |
| 4041 2014-12-16 | _EPI_ISL_170135 | _A/Idaho/08/2014                | _Garten_Rebecca |
| 4042 2014-12-16 | _EPI_ISL_170700 | _A/Delaware/36/2014             | _Garten_Rebecca |
| 4043 2014-12-16 | _EPI_ISL_170736 | _A/Delaware/37/2014             | _Garten_Rebecca |
| 4044 2014-12-16 | _EPI_ISL_172506 | _A/Wisconsin/68/2014            | _Garten_Rebecca |
| 4045 2014-12-16 | _EPI_ISL_172830 | _A/Idaho/12/2014                | _Garten_Rebecca |
| 4046 2014-12-16 | _EPI_ISL_173219 | _A/Michigan/30/2014             | _Garten_Rebecca |
| 4047 2014-12-16 | _EPI_ISL_175188 | _A/Texas/93/2014                | _Garten_Rebecca |
| 4048 2014-12-16 | _EPI_ISL_175200 | _A/Chita/262/2014               | _Garten_Rebecca |
| 4049 2014-12-16 | _EPI_ISL_175223 | _A/Astrakhan/24/2014            | _Garten_Rebecca |
| 4050 2014-12-16 | _EPI_ISL_175251 | _A/Georgia/39/2014              | _Garten_Rebecca |
| 4051 2014-12-16 | _EPI_ISL_186567 | _A/England/599/2014             | Galiano_Monica  |
| 4052 2014-12-16 | _EPI_ISL_188791 | _A/England/45140001/2014        | Galiano_Monica  |
| 4053 2014-12-16 | _EPI_ISL_188796 | _A/England/45160094/2014        | Galiano_Monica  |
| 4054 2014-12-16 | _EPI_ISL_188798 | _A/England/45180212/2014        | Galiano_Monica  |
| 4055 2014-12-16 | _EPI_ISL_188803 | _A/England/545/2014             | Galiano_Monica  |
| 4056 2014-12-17 | _EPI_ISL_172496 | _A/Wisconsin/69/2014            | _Garten_Rebecca |
| 4057 2014-12-17 | _EPI_ISL_172505 | _A/Massachusetts/22/2014        | _Garten_Rebecca |
| 4058 2014-12-17 | _EPI_ISL_172559 | _A/Kentucky/21/2014             | _Garten_Rebecca |
| 4059 2014-12-17 | _EPI_ISL_172583 | _A/Washington/46/2014           | _Garten_Rebecca |
| 4060 2014-12-17 | _EPI_ISL_172587 | _A/Nevada/30/2014               | _Garten_Rebecca |
| 4061 2014-12-17 | _EPI_ISL_172612 | _A/Washington/47/2014           | _Garten_Rebecca |
| 4062 2014-12-17 | _EPI_ISL_172751 | _A/Delaware/43/2014             | _Garten_Rebecca |
| 4063 2014-12-17 | _EPI_ISL_172792 | _A/Mexico/3040/2014             | _Garten_Rebecca |
| 4064 2014-12-17 | _EPI_ISL_172573 | _A/Colorado/36/2014             | _Garten_Rebecca |
| 4065 2014-12-17 | _EPI_ISL_172499 | _A/Missouri/21/2014             | _Garten_Rebecca |
| 4066 2014-12-17 | _EPI_ISL_175174 | _A/Cambodia/1384/2014           | _Garten_Rebecca |
| 4067 2014-12-17 | _EPI_ISL_175197 | _A/Tanzania/613/2014            | _Garten_Rebecca |
| 4068 2014-12-17 | _EPI_ISL_175295 | _A/WAKAYAMA/167/2014            | Takashita_Emi   |
| 4069 2014-12-17 | _EPI_ISL_176515 | _A/Congo/2544/2014              | _Garten_Rebecca |
| 4070 2014-12-17 | _EPI_ISL_177526 | _A/Maryland/50/2014             | _Garten_Rebecca |
| 4071 2014-12-17 | _EPI_ISL_188795 | _A/England/45160092/2014        | Galiano_Monica  |
| 4072 2014-12-17 | _EPI_ISL_188799 | _A/England/543/2014             | Galiano_Monica  |
| 4073 2014-12-17 | _EPI_ISL_188800 | _A/England/45180219/2014        | Galiano_Monica  |
| 4074 2014-12-17 | _EPI_ISL_188801 | _A/England/45180220/2014        | Galiano_Monica  |
| 4075 2014-12-17 | _EPI_ISL_188804 | _A/England/45180226/2014        | Galiano_Monica  |
| 4076 2014-12-17 | _EPI_ISL_188806 | _A/England/602/2014             | Galiano_Monica  |
| 4077 2014-12-17 | _EPI_ISL_188810 | _A/England/45200054/2014        | Galiano_Monica  |
| 4078 2014-12-17 | _EPI_ISL_188879 | _A/Maryland/53/2014             | _Garten_Rebecca |
| 4079 2014-12-17 | _EPI_ISL_188886 | _A/Georgia/38/2014              | _Garten_Rebecca |
| 4080 2014-12-17 | _EPI_ISL_192204 | _A/ENG/45160093/2014            | Galiano_Monica  |
| 4081 2014-12-18 | _EPI_ISL_170116 | _A/Idaho/09/2014                | _Garten_Rebecca |
| 4082 2014-12-18 | _EPI_ISL_170685 | _A/Vermont/11/2014              | _Garten_Rebecca |
| 4083 2014-12-18 | _EPI_ISL_170836 | _A/Sweden/77/2014               | Brytting_Maria  |
| 4084 2014-12-18 | _EPI_ISL_171387 | _A/Florida/80/2014              | _Garten_Rebecca |
| 4085 2014-12-18 | _EPI_ISL_172557 | _A/Illinois/14/2014             | _Garten_Rebecca |
| 4086 2014-12-18 | _EPI_ISL_172562 | _A/Montana/30/2014              | _Garten_Rebecca |
| 4087 2014-12-18 | _EPI_ISL_172576 | _A/Idaho/10/2014                | _Garten_Rebecca |
| 4088 2014-12-18 | _EPI_ISL_172768 | _A/Ontario/RV3609/2014          | _Garten_Rebecca |
| 4089 2014-12-18 | _EPI_ISL_176513 | _A/Congo/2538/2014              | _Garten_Rebecca |
| 4090 2014-12-18 | _EPI_ISL_176548 | _A/Congo/2557/2014              | _Garten_Rebecca |
| 4091 2014-12-18 | _EPI_ISL_177534 | _A/Florida/89/2014              | _Garten_Rebecca |
| 4092 2014-12-18 | _EPI_ISL_188794 | _A/England/45160088/2014        | Galiano_Monica  |
| 4093 2014-12-18 | _EPI_ISL_188802 | _A/England/544/2014             | Galiano_Monica  |
| 4094 2014-12-18 | _EPI_ISL_188807 | _A/England/45200044/2014        | Galiano_Monica  |
| 4095 2014-12-18 | _EPI_ISL_188808 | _A/England/547/2014             | Galiano_Monica  |
| 4096 2014-12-18 | _EPI_ISL_188809 | _A/England/45200047/2014        | Galiano_Monica  |
| 4097 2014-12-18 | _EPI_ISL_188813 | _A/England/556/2014             | Galiano_Monica  |
| 4098 2014-12-18 | _EPI_ISL_188816 | _A/England/45240252/2014        | Galiano_Monica  |
| 4099 2014-12-19 | _EPI_ISL_172508 | _A/Rhode_Island/23/2014         | _Garten_Rebecca |
| 4100 2014-12-19 | _EPI_ISL_172510 | _A/Washington/48/2014           | _Garten_Rebecca |
| 4101 2014-12-19 | _EPI_ISL_172599 | _A/District_Of_Columbia/05/2014 | _Garten_Rebecca |
| 4102 2014-12-19 | _EPI_ISL_173255 | _A/Wisconsin/72/2014            | _Garten_Rebecca |
| 4103 2014-12-19 | _EPI_ISL_188805 | _A/England/45180235/2014        | Galiano_Monica  |
| 4104 2014-12-19 | _EPI_ISL_188812 | _A/England/45220034/2014        | Galiano_Monica  |
| 4105 2014-12-19 | _EPI_ISL_188819 | _A/England/603/2014             | Galiano_Monica  |
| 4106 2014-12-20 | _EPI_ISL_173250 | _A/Texas/106/2014               | _Garten_Rebecca |
| 4107 2014-12-20 | _EPI_ISL_188889 | _A/Vermont/22/2014              | _Garten_Rebecca |
| 4108 2014-12-21 | _EPI_ISL_177528 | _A/Massachusetts/27/2014        | _Garten_Rebecca |
| 4109 2014-12-21 | _EPI_ISL_188835 | _A/England/50200102/2014        | Galiano_Monica  |
| 4110 2014-12-22 | _EPI_ISL_170678 | _A/Nevada/27/2014               | _Garten_Rebecca |

|      |                               |                  |                                  |                  |
|------|-------------------------------|------------------|----------------------------------|------------------|
| 4111 | 2014-12-22_                   | _EPI_ISL_170697_ | _A/Virginia/35/2014_             | _Garten_Rebecca_ |
| 4112 | 2014-12-22_                   | _EPI_ISL_172575_ | _A/Delaware/42/2014_             | _Garten_Rebecca_ |
| 4113 | 2014-12-22_                   | _EPI_ISL_172780_ | _A/Seoul/2007/2014_              | _Garten_Rebecca_ |
| 4114 | 2014-12-22_                   | _EPI_ISL_173218_ | _A/Michigan/31/2014_             | _Garten_Rebecca_ |
| 4115 | 2014-12-22_                   | _EPI_ISL_173225_ | _A/Florida/92/2014_              | _Garten_Rebecca_ |
| 4116 | 2014-12-22_                   | _EPI_ISL_173230_ | _A/Kentucky/24/2014_             | _Garten_Rebecca_ |
| 4117 | 2014-12-22_                   | _EPI_ISL_173253_ | _A/Kentucky/25/2014_             | _Garten_Rebecca_ |
| 4118 | 2014-12-22_                   | _EPI_ISL_173258_ | _A/Wisconsin/75/2014_            | _Garten_Rebecca_ |
| 4119 | 2014-12-22_                   | _EPI_ISL_175296_ | _A/TOKYO/34558/2014_             | _Takashita_Emi_  |
| 4120 | 2014-12-22_                   | _EPI_ISL_188811_ | _A/England/575/2014_             | _Galiano_Monica_ |
| 4121 | 2014-12-22_                   | _EPI_ISL_188814_ | _A/England/45240246/2014_        | _Galiano_Monica_ |
| 4122 | 2014-12-22_                   | _EPI_ISL_188817_ | _A/England/45240260/2014_        | _Galiano_Monica_ |
| 4123 | 2014-12-22_                   | _EPI_ISL_188818_ | _A/England/45240273/2014_        | _Galiano_Monica_ |
| 4124 | 2014-12-22_                   | _EPI_ISL_191049_ | _A/Chita/14/2014_                | _Garten_Rebecca_ |
| 4125 | 2014-12-22_                   | _EPI_ISL_177527_ | _A/Pennsylvania/60/2014_         | _Garten_Rebecca_ |
| 4126 | 2014-12-22_                   | _EPI_ISL_191672_ | _A/Congo/2588/2014_              | _Garten_Rebecca_ |
| 4127 | 2014-12-22_                   | _EPI_ISL_191708_ | _A/Congo/2586/2014_              | _Garten_Rebecca_ |
| 4128 | 2014-12-23_                   | _EPI_ISL_170735_ | _A/Washington/39/2014_           | _Garten_Rebecca_ |
| 4129 | 2014-12-23_                   | _EPI_ISL_171351_ | _A/Nevada/29/2014_               | _Garten_Rebecca_ |
| 4130 | 2014-12-23_                   | _EPI_ISL_172494_ | _A/California/43/2014_           | _Garten_Rebecca_ |
| 4131 | 2014-12-23_                   | _EPI_ISL_172507_ | _A/Missouri/19/2014_             | _Garten_Rebecca_ |
| 4132 | 2014-12-23_                   | _EPI_ISL_173233_ | _A/Kentucky/27/2014_             | _Garten_Rebecca_ |
| 4133 | 2014-12-23_                   | _EPI_ISL_186568_ | _A/England/591/2014_             | _Galiano_Monica_ |
| 4134 | 2014-12-23_                   | _EPI_ISL_188815_ | _A/England/558/2014_             | _Galiano_Monica_ |
| 4135 | 2014-12-23_                   | _EPI_ISL_188820_ | _A/England/50100002/2014_        | _Galiano_Monica_ |
| 4136 | 2014-12-23_                   | _EPI_ISL_188825_ | _A/England/564/2014_             | _Galiano_Monica_ |
| 4137 | 2014-12-23_                   | _EPI_ISL_188828_ | _A/England/50120074/2014_        | _Galiano_Monica_ |
| 4138 | 2014-12-23_                   | _EPI_ISL_188830_ | _A/England/50120129/2014_        | _Galiano_Monica_ |
| 4139 | 2014-12-23_                   | _EPI_ISL_188870_ | _A/Texas/94/2014_                | _Garten_Rebecca_ |
| 4140 | 2014-12-23_                   | _EPI_ISL_188888_ | _A/Washington/60/2014_           | _Garten_Rebecca_ |
| 4141 | 2014-12-23_                   | _EPI_ISL_192214_ | _A/ENG/50100055/2014_            | _Galiano_Monica_ |
| 4142 | 2014-12-24_                   | _EPI_ISL_172586_ | _A/Hawaii/65/2014_               | _Garten_Rebecca_ |
| 4143 | 2014-12-24_                   | _EPI_ISL_176329_ | _A/Nagasaki/14N017/2014_         | _Hiroki_Kondo_   |
| 4144 | 2014-12-24_                   | _EPI_ISL_188821_ | _A/England/50100063/2014_        | _Galiano_Monica_ |
| 4145 | 2014-12-24_                   | _EPI_ISL_188822_ | _A/England/50100065/2014_        | _Galiano_Monica_ |
| 4146 | 2014-12-24_                   | _EPI_ISL_188823_ | _A/England/563/2014_             | _Galiano_Monica_ |
| 4147 | 2014-12-24_                   | _EPI_ISL_188827_ | _A/England/50120073/2014_        | _Galiano_Monica_ |
| 4148 | 2014-12-24_                   | _EPI_ISL_192215_ | _A/ENG/50100064/2014_            | _Galiano_Monica_ |
| 4149 | 2014-12-25_                   | _EPI_ISL_171856_ | _A/YOKOHAMA/184/2014_            | _Takashita_Emi_  |
| 4150 | 2014-12-25_                   | _EPI_ISL_175172_ | _A/Iowa/31/2014_                 | _Garten_Rebecca_ |
| 4151 | 2014-12-25_                   | _EPI_ISL_176330_ | _A/Nagasaki/14N018/2014_         | _Hiroki_Kondo_   |
| 4152 | 2014-12-25_                   | _EPI_ISL_191051_ | _A/Chita/12/2014_                | _Garten_Rebecca_ |
| 4153 | 2014-12-26_                   | _EPI_ISL_172498_ | _A/Missouri/20/2014_             | _Garten_Rebecca_ |
| 4154 | 2014-12-26_                   | _EPI_ISL_172527_ | _A/Nonthaburi/01/2015_           | _Garten_Rebecca_ |
| 4155 | 2014-12-26_                   | _EPI_ISL_172600_ | _A/District_Of_Columbia/04/2014_ | _Garten_Rebecca_ |
| 4156 | 2014-12-26_                   | _EPI_ISL_173234_ | _A/Michigan/32/2014_             | _Garten_Rebecca_ |
| 4157 | 2014-12-26_                   | _EPI_ISL_173252_ | _A/Texas/105/2014_               | _Garten_Rebecca_ |
| 4158 | 2014-12-26_                   | _EPI_ISL_173257_ | _A/Washington/53/2014_           | _Garten_Rebecca_ |
| 4159 | 2014-12-26_                   | _EPI_ISL_175189_ | _A/Texas/96/2014_                | _Garten_Rebecca_ |
| 4160 | 2014-12-26_                   | _EPI_ISL_188895_ | _A/Texas/95/2014_                | _Garten_Rebecca_ |
| 4161 | 2014-12-27_                   | _EPI_ISL_170840_ | _A/Stockholm/35/2014_            | _Brytting_Maria_ |
| 4162 | 2014-12-27_                   | _EPI_ISL_172523_ | _A/District_Of_Columbia/08/2014_ | _Garten_Rebecca_ |
| 4163 | 2014-12-27_                   | _EPI_ISL_172744_ | _A/Ohio/12/2014_                 | _Garten_Rebecca_ |
| 4164 | 2014-12-28_                   | _EPI_ISL_172526_ | _A/District_Of_Columbia/10/2014_ | _Garten_Rebecca_ |
| 4165 | 2014-12-28_                   | _EPI_ISL_176331_ | _A/Nagasaki/14N023/2014_         | _Hiroki_Kondo_   |
| 4166 | 2014-12-28_                   | _EPI_ISL_177545_ | _A/Virginia/41/2014_             | _Garten_Rebecca_ |
| 4167 | 2014-12-28_                   | _EPI_ISL_195543_ | _A/Maryland/58/2014_             | _Garten_Rebecca_ |
| 4168 | 2014-12-29_                   | _EPI_ISL_170732_ | _A/Maine/07/2014_                | _Garten_Rebecca_ |
| 4169 | 2014-12-29_                   | _EPI_ISL_172569_ | _A/Delaware/39/2014_             | _Garten_Rebecca_ |
| 4170 | 2014-12-29_                   | _EPI_ISL_172578_ | _A/New_York/40/2014_             | _Garten_Rebecca_ |
| 4171 | 2014-12-29_                   | _EPI_ISL_173221_ | _A/Michigan/28/2014_             | _Garten_Rebecca_ |
| 4172 | 2014-12-29_                   | _EPI_ISL_173237_ | _A/Washington/57/2014_           | _Garten_Rebecca_ |
| 4173 | 2014-12-29_                   | _EPI_ISL_175231_ | _A/Kazakhstan/15/2014_           | _Garten_Rebecca_ |
| 4174 | 2014-12-29_                   | _EPI_ISL_176547_ | _A/Congo/2611/2014_              | _Garten_Rebecca_ |
| 4175 | 2014-12-29_                   | _EPI_ISL_188824_ | _A/England/50120064/2014_        | _Galiano_Monica_ |
| 4176 | 2014-12-29_                   | _EPI_ISL_188826_ | _A/England/606/2014_             | _Galiano_Monica_ |
| 4177 | 2014-12-29_                   | _EPI_ISL_188832_ | _A/England/50140086/2014_        | _Galiano_Monica_ |
| 4178 | 2014-12-29_                   | _EPI_ISL_188833_ | _A/England/50140112/2014_        | _Galiano_Monica_ |
| 4179 | 2014-12-29_                   | _EPI_ISL_188834_ | _A/England/50180052/2014_        | _Galiano_Monica_ |
| 4180 | 2014-12-29_                   | _EPI_ISL_188838_ | _A/England/50200132/2014_        | _Galiano_Monica_ |
| 4181 | 2014-12-29_                   | _EPI_ISL_188839_ | _A/England/50200133/2014_        | _Galiano_Monica_ |
| 4182 | 2014-12-29_                   | _EPI_ISL_191694_ | _A/Congo/2603/2014_              | _Garten_Rebecca_ |
| 4183 | 2014-12-29_                   | _EPI_ISL_202386_ | _A/Virginia/51/2014_             | _Garten_Rebecca_ |
| 4184 | 2014-12-30_                   | _EPI_ISL_170696_ | _A/Maine/08/2014_                | _Garten_Rebecca_ |
| 4185 | 2014-12-30_                   | _EPI_ISL_170839_ | _A/Stockholm/34/2014_            | _Brytting_Maria_ |
| 4186 | 2014-12-30_                   | _EPI_ISL_188829_ | _A/England/50120128/2014_        | _Galiano_Monica_ |
| 4187 | 2014-12-30_                   | _EPI_ISL_188831_ | _A/England/50140078/2014_        | _Galiano_Monica_ |
| 4188 | 2014-12-30_                   | _EPI_ISL_188837_ | _A/England/50200119/2014_        | _Galiano_Monica_ |
| 4189 | 2014-12-30_                   | _EPI_ISL_188840_ | _A/England/50200134/2014_        | _Galiano_Monica_ |
| 4190 | 2014-12-30_                   | _EPI_ISL_192236_ | _A/ENG/50200185/2014_            | _Galiano_Monica_ |
| 4191 | 2014-12-31_                   | _EPI_ISL_170841_ | _A/Skovde/1/2014_                | _Brytting_Maria_ |
| 4192 | 2014-12-31_                   | _EPI_ISL_172577_ | _A/New_York/39/2014_             | _Garten_Rebecca_ |
| 4193 | 2014-12-31_                   | _EPI_ISL_172831_ | _A/New_York/38/2014_             | _Garten_Rebecca_ |
| 4194 | 2014-12-31_                   | _EPI_ISL_188836_ | _A/England/50200115/2014_        | _Galiano_Monica_ |
| 4195 | 2014-12-31_                   | _EPI_ISL_188841_ | _A/England/50200158/2014_        | _Galiano_Monica_ |
| 4196 | 2014-12-31_                   | _EPI_ISL_188842_ | _A/England/50200190/2014_        | _Galiano_Monica_ |
| 4197 | 2015_(Month_and_day_unknown)_ | _EPI_ISL_176541_ | _A/Georgia/02/2015_              | _Garten_Rebecca_ |
| 4198 | 2015_(Month_and_day_unknown)_ | _EPI_ISL_176542_ | _A/Georgia/01/2015_              | _Garten_Rebecca_ |
| 4199 | 2015_(Month_and_day_unknown)_ | _EPI_ISL_191064_ | _A/Florida/41/2015_              | _Garten_Rebecca_ |
| 4200 | 2015_(Month_and_day_unknown)_ | _EPI_ISL_202085_ | _A/South_Carolina/09/2015_       | _Garten_Rebecca_ |
| 4201 | 2015_(Month_and_day_unknown)_ | _EPI_ISL_202855_ | _A/Georgia/12/2015_              | _Garten_Rebecca_ |
| 4202 | 2015-01-01_                   | _EPI_ISL_170694_ | _A/Maine/01/2015_                | _Garten_Rebecca_ |
| 4203 | 2015-01-01_                   | _EPI_ISL_170842_ | _A/Skovde/1/2015_                | _Brytting_Maria_ |
| 4204 | 2015-01-01_                   | _EPI_ISL_172502_ | _A/Rhode_Island/01/2015_         | _Garten_Rebecca_ |
| 4205 | 2015-01-01_                   | _EPI_ISL_172730_ | _A/Maine/03/2015_                | _Garten_Rebecca_ |
| 4206 | 2015-01-01_                   | _EPI_ISL_172740_ | _A/Kentucky/01/2015_             | _Garten_Rebecca_ |
| 4207 | 2015-01-01_                   | _EPI_ISL_172763_ | _A/Oregon/01/2015_               | _Garten_Rebecca_ |
| 4208 | 2015-01-01_                   | _EPI_ISL_173235_ | _A/North_Dakota/02/2015_         | _Garten_Rebecca_ |
| 4209 | 2015-01-01_                   | _EPI_ISL_174154_ | _A/North_Dakota/03/2015_         | _Garten_Rebecca_ |
| 4210 | 2015-01-01_                   | _EPI_ISL_175238_ | _A/Kazakhstan/16/2015_           | _Garten_Rebecca_ |
| 4211 | 2015-01-01_                   | _EPI_ISL_176531_ | _A/California/06/2015_           | _Garten_Rebecca_ |
| 4212 | 2015-01-01_                   | _EPI_ISL_176562_ | _A/Delaware/10/2015_             | _Garten_Rebecca_ |
| 4213 | 2015-01-02_                   | _EPI_ISL_172495_ | _A/Maine/04/2015_                | _Garten_Rebecca_ |
| 4214 | 2015-01-02_                   | _EPI_ISL_172512_ | _A/Pennsylvania/01/2015_         | _Garten_Rebecca_ |
| 4215 | 2015-01-02_                   | _EPI_ISL_172746_ | _A/Utah/01/2015_                 | _Garten_Rebecca_ |
| 4216 | 2015-01-02_                   | _EPI_ISL_172754_ | _A/West_Virginia/01/2015_        | _Garten_Rebecca_ |
| 4217 | 2015-01-02_                   | _EPI_ISL_172757_ | _A/Wisconsin/01/2015_            | _Garten_Rebecca_ |
| 4218 | 2015-01-02_                   | _EPI_ISL_172782_ | _A/Delaware/02/2015_             | _Garten_Rebecca_ |
| 4219 | 2015-01-02_                   | _EPI_ISL_172783_ | _A/Delaware/01/2015_             | _Garten_Rebecca_ |
| 4220 | 2015-01-02_                   | _EPI_ISL_172793_ | _A/Florida/02/2015_              | _Garten_Rebecca_ |
| 4221 | 2015-01-02_                   | _EPI_ISL_172794_ | _A/Florida/03/2015_              | _Garten_Rebecca_ |
| 4222 | 2015-01-02_                   | _EPI_ISL_172801_ | _A/Florida/01/2015_              | _Garten_Rebecca_ |
| 4223 | 2015-01-02_                   | _EPI_ISL_172809_ | _A/Florida/10/2015_              | _Garten_Rebecca_ |
| 4224 | 2015-01-02_                   | _EPI_ISL_172908_ | _A/Sweden/1/2015_                | _Brytting_Maria_ |
| 4225 | 2015-01-02_                   | _EPI_ISL_173224_ | _A/Michigan/03/2015_             | _Garten_Rebecca_ |
| 4226 | 2015-01-02_                   | _EPI_ISL_173227_ | _A/Washington/02/2015_           | _Garten_Rebecca_ |
| 4227 | 2015-01-02_                   | _EPI_ISL_173240_ | _A/Wisconsin/03/2015_            | _Garten_Rebecca_ |
| 4228 | 2015-01-02_                   | _EPI_ISL_174141_ | _A/Oregon/02/2015_               | _Garten_Rebecca_ |
| 4229 | 2015-01-02_                   | _EPI_ISL_175232_ | _A/Kazakhstan/22/2015_           | _Garten_Rebecca_ |
| 4230 | 2015-01-02_                   | _EPI_ISL_186569_ | _A/England/50200164/2015_        | _Galiano_Monica_ |
| 4231 | 2015-01-02_                   | _EPI_ISL_186570_ | _A/England/50200187/2015_        | _Galiano_Monica_ |

|      |             |                  |                            |                  |
|------|-------------|------------------|----------------------------|------------------|
| 4232 | 2015-01-02_ | _EPI_ISL_186571_ | _A/England/50220068/2015_  | _Galiano_Monica_ |
| 4233 | 2015-01-02_ | _EPI_ISL_186572_ | _A/England/50220079/2015_  | _Galiano_Monica_ |
| 4234 | 2015-01-02_ | _EPI_ISL_186573_ | _A/England/50220082/2015_  | _Galiano_Monica_ |
| 4235 | 2015-01-02_ | _EPI_ISL_188868_ | _A/Georgia/07/2015_        | _Garten_Rebecca_ |
| 4236 | 2015-01-02_ | _EPI_ISL_188876_ | _A/Idaho/11/2015_          | _Garten_Rebecca_ |
| 4237 | 2015-01-02_ | _EPI_ISL_191050_ | _A/Georgia/05/2015_        | _Garten_Rebecca_ |
| 4238 | 2015-01-02_ | _EPI_ISL_191052_ | _A/Georgia/06/2015_        | _Garten_Rebecca_ |
| 4239 | 2015-01-03_ | _EPI_ISL_172748_ | _A/Florida/06/2015_        | _Garten_Rebecca_ |
| 4240 | 2015-01-03_ | _EPI_ISL_174136_ | _A/Oklahoma/02/2015_       | _Garten_Rebecca_ |
| 4241 | 2015-01-03_ | _EPI_ISL_174186_ | _A/Missouri/01/2015_       | _Garten_Rebecca_ |
| 4242 | 2015-01-03_ | _EPI_ISL_175175_ | _A/New_Mexico/01/2015_     | _Garten_Rebecca_ |
| 4243 | 2015-01-03_ | _EPI_ISL_176544_ | _A/Virginia/06/2015_       | _Garten_Rebecca_ |
| 4244 | 2015-01-04_ | _EPI_ISL_173231_ | _A/Texas/05/2015_          | _Garten_Rebecca_ |
| 4245 | 2015-01-04_ | _EPI_ISL_173256_ | _A/Mississippi/01/2015_    | _Garten_Rebecca_ |
| 4246 | 2015-01-04_ | _EPI_ISL_174182_ | _A/California/01/2015_     | _Garten_Rebecca_ |
| 4247 | 2015-01-04_ | _EPI_ISL_176538_ | _A/Minnesota/01/2015_      | _Garten_Rebecca_ |
| 4248 | 2015-01-04_ | _EPI_ISL_176543_ | _A/Virginia/02/2015_       | _Garten_Rebecca_ |
| 4249 | 2015-01-04_ | _EPI_ISL_176545_ | _A/Virginia/03/2015_       | _Garten_Rebecca_ |
| 4250 | 2015-01-04_ | _EPI_ISL_194133_ | _A/California/44/2015_     | _Garten_Rebecca_ |
| 4251 | 2015-01-05_ | _EPI_ISL_172743_ | _A/Florida/09/2015_        | _Garten_Rebecca_ |
| 4252 | 2015-01-05_ | _EPI_ISL_172745_ | _A/Florida/07/2015_        | _Garten_Rebecca_ |
| 4253 | 2015-01-05_ | _EPI_ISL_173223_ | _A/Mississippi/02/2015_    | _Garten_Rebecca_ |
| 4254 | 2015-01-05_ | _EPI_ISL_173242_ | _A/Michigan/02/2015_       | _Garten_Rebecca_ |
| 4255 | 2015-01-05_ | _EPI_ISL_174132_ | _A/Rhode_Island/02/2015_   | _Garten_Rebecca_ |
| 4256 | 2015-01-05_ | _EPI_ISL_174145_ | _A/Nebraska/01/2015_       | _Garten_Rebecca_ |
| 4257 | 2015-01-05_ | _EPI_ISL_175165_ | _A/Colorado/04/2015_       | _Garten_Rebecca_ |
| 4258 | 2015-01-05_ | _EPI_ISL_175234_ | _A/Kazakhstan/27/2015_     | _Garten_Rebecca_ |
| 4259 | 2015-01-05_ | _EPI_ISL_175237_ | _A/Kazakhstan/20/2015_     | _Garten_Rebecca_ |
| 4260 | 2015-01-05_ | _EPI_ISL_175241_ | _A/Kazakhstan/25/2015_     | _Garten_Rebecca_ |
| 4261 | 2015-01-05_ | _EPI_ISL_175248_ | _A/Kazakhstan/26/2015_     | _Garten_Rebecca_ |
| 4262 | 2015-01-05_ | _EPI_ISL_176521_ | _A/Idaho/08/2015_          | _Garten_Rebecca_ |
| 4263 | 2015-01-05_ | _EPI_ISL_176529_ | _A/California/08/2015_     | _Garten_Rebecca_ |
| 4264 | 2015-01-05_ | _EPI_ISL_176672_ | _A/Idaho/10/2015_          | _Garten_Rebecca_ |
| 4265 | 2015-01-05_ | _EPI_ISL_176857_ | _A/Nagasaki/14N024/2015_   | Hiroki_Kondo_    |
| 4266 | 2015-01-05_ | _EPI_ISL_176859_ | _A/Nagasaki/14N072/2015_   | Hiroki_Kondo_    |
| 4267 | 2015-01-05_ | _EPI_ISL_186574_ | _A/England/50240248/2015_  | Galiano_Monica_  |
| 4268 | 2015-01-05_ | _EPI_ISL_186576_ | _A/England/11/2015_        | Galiano_Monica_  |
| 4269 | 2015-01-05_ | _EPI_ISL_186577_ | _A/England/12/2015_        | Galiano_Monica_  |
| 4270 | 2015-01-05_ | _EPI_ISL_186579_ | _A/England/13/2015_        | Galiano_Monica_  |
| 4271 | 2015-01-05_ | _EPI_ISL_186581_ | _A/England/50260150/2015_  | Galiano_Monica_  |
| 4272 | 2015-01-05_ | _EPI_ISL_191714_ | _A/South_Dakota/01/2015_   | Garten_Rebecca_  |
| 4273 | 2015-01-05_ | _EPI_ISL_192246_ | _A/ENG/50360752/2015_      | Galiano_Monica_  |
| 4274 | 2015-01-05_ | _EPI_ISL_194143_ | _A/Brazil/70/2015_         | Garten_Rebecca_  |
| 4275 | 2015-01-06_ | _EPI_ISL_172511_ | _A/Texas/02/2015_          | Garten_Rebecca_  |
| 4276 | 2015-01-06_ | _EPI_ISL_172749_ | _A/Montana/01/2015_        | Garten_Rebecca_  |
| 4277 | 2015-01-06_ | _EPI_ISL_172758_ | _A/Wisconsin/02/2015_      | Garten_Rebecca_  |
| 4278 | 2015-01-06_ | _EPI_ISL_172806_ | _A/Florida/11/2015_        | Garten_Rebecca_  |
| 4279 | 2015-01-06_ | _EPI_ISL_173217_ | _A/Alabama/01/2015_        | Garten_Rebecca_  |
| 4280 | 2015-01-06_ | _EPI_ISL_174122_ | _A/Rhode_Island/03/2015_   | Garten_Rebecca_  |
| 4281 | 2015-01-06_ | _EPI_ISL_174139_ | _A/North_Carolina/08/2015_ | Garten_Rebecca_  |
| 4282 | 2015-01-06_ | _EPI_ISL_174172_ | _A/Michigan/04/2015_       | Garten_Rebecca_  |
| 4283 | 2015-01-06_ | _EPI_ISL_175166_ | _A/Rhode_Island/06/2015_   | Garten_Rebecca_  |
| 4284 | 2015-01-06_ | _EPI_ISL_175173_ | _A/Iowa/04/2015_           | Garten_Rebecca_  |
| 4285 | 2015-01-06_ | _EPI_ISL_175233_ | _A/Kazakhstan/29/2015_     | Garten_Rebecca_  |
| 4286 | 2015-01-06_ | _EPI_ISL_175235_ | _A/Kazakhstan/30/2015_     | Garten_Rebecca_  |
| 4287 | 2015-01-06_ | _EPI_ISL_175236_ | _A/Kazakhstan/33/2015_     | Garten_Rebecca_  |
| 4288 | 2015-01-06_ | _EPI_ISL_175240_ | _A/Kazakhstan/31/2015_     | Garten_Rebecca_  |
| 4289 | 2015-01-06_ | _EPI_ISL_175245_ | _A/Kazakhstan/34/2015_     | Garten_Rebecca_  |
| 4290 | 2015-01-06_ | _EPI_ISL_176523_ | _A/California/09/2015_     | Garten_Rebecca_  |
| 4291 | 2015-01-06_ | _EPI_ISL_176571_ | _A/Tennessee/06/2015_      | Garten_Rebecca_  |
| 4292 | 2015-01-06_ | _EPI_ISL_176572_ | _A/Tennessee/05/2015_      | Garten_Rebecca_  |
| 4293 | 2015-01-06_ | _EPI_ISL_176715_ | _A/Kentucky/02/2015_       | Garten_Rebecca_  |
| 4294 | 2015-01-06_ | _EPI_ISL_176860_ | _A/Okinawa/14T003/2015_    | Hiroki_Kondo_    |
| 4295 | 2015-01-06_ | _EPI_ISL_178967_ | _A/Georgia/03/2015_        | Garten_Rebecca_  |
| 4296 | 2015-01-06_ | _EPI_ISL_186575_ | _A/England/10/2015_        | Galiano_Monica_  |
| 4297 | 2015-01-06_ | _EPI_ISL_186578_ | _A/England/49/2015_        | Galiano_Monica_  |
| 4298 | 2015-01-06_ | _EPI_ISL_186580_ | _A/England/50/2015_        | Galiano_Monica_  |
| 4299 | 2015-01-06_ | _EPI_ISL_188844_ | _A/England/50220076/2015_  | Galiano_Monica_  |
| 4300 | 2015-01-06_ | _EPI_ISL_188845_ | _A/England/50220894/2015_  | Galiano_Monica_  |
| 4301 | 2015-01-06_ | _EPI_ISL_188846_ | _A/England/50220895/_      | Galiano_Monica_  |
| 4302 | 2015-01-06_ | _EPI_ISL_188848_ | _A/England/50360756/2015_  | Galiano_Monica_  |
| 4303 | 2015-01-06_ | _EPI_ISL_188849_ | _A/England/50380175/2015_  | Galiano_Monica_  |
| 4304 | 2015-01-06_ | _EPI_ISL_192170_ | _A/South_Dakota/20/2015_   | Garten_Rebecca_  |
| 4305 | 2015-01-07_ | _EPI_ISL_172602_ | _A/Florida/04/2015_        | Garten_Rebecca_  |
| 4306 | 2015-01-07_ | _EPI_ISL_172805_ | _A/Florida/12/2015_        | Garten_Rebecca_  |
| 4307 | 2015-01-07_ | _EPI_ISL_173216_ | _A/Texas/04/2015_          | Garten_Rebecca_  |
| 4308 | 2015-01-07_ | _EPI_ISL_173220_ | _A/North_Carolina/06/2015_ | Garten_Rebecca_  |
| 4309 | 2015-01-07_ | _EPI_ISL_174147_ | _A/Nevada/04/2015_         | Garten_Rebecca_  |
| 4310 | 2015-01-07_ | _EPI_ISL_175168_ | _A/New_York/07/2015_       | Garten_Rebecca_  |
| 4311 | 2015-01-07_ | _EPI_ISL_175239_ | _A/Kazakhstan/35/2015_     | Garten_Rebecca_  |
| 4312 | 2015-01-07_ | _EPI_ISL_176494_ | _A/Pennsylvania/08/2015_   | Garten_Rebecca_  |
| 4313 | 2015-01-07_ | _EPI_ISL_176503_ | _A/Pennsylvania/06/2015_   | Garten_Rebecca_  |
| 4314 | 2015-01-07_ | _EPI_ISL_176505_ | _A/Pennsylvania/09/2015_   | Garten_Rebecca_  |
| 4315 | 2015-01-07_ | _EPI_ISL_176533_ | _A/California/04/2015_     | Garten_Rebecca_  |
| 4316 | 2015-01-07_ | _EPI_ISL_176539_ | _A/Minnesota/02/2015_      | Garten_Rebecca_  |
| 4317 | 2015-01-07_ | _EPI_ISL_176711_ | _A/Colorado/05/2015_       | Garten_Rebecca_  |
| 4318 | 2015-01-07_ | _EPI_ISL_176745_ | _A/Pennsylvania/11/2015_   | Garten_Rebecca_  |
| 4319 | 2015-01-07_ | _EPI_ISL_182625_ | _A/Pennsylvania/09/2015_   | Garten_Rebecca_  |
| 4320 | 2015-01-07_ | _EPI_ISL_186582_ | _A/England/50260151/2015_  | Galiano_Monica_  |
| 4321 | 2015-01-07_ | _EPI_ISL_186583_ | _A/England/18/2015_        | Galiano_Monica_  |
| 4322 | 2015-01-07_ | _EPI_ISL_186584_ | _A/England/50280041/2015_  | Galiano_Monica_  |
| 4323 | 2015-01-07_ | _EPI_ISL_186585_ | _A/England/50280054/2015_  | Galiano_Monica_  |
| 4324 | 2015-01-07_ | _EPI_ISL_186587_ | _A/England/50300008/2015_  | Galiano_Monica_  |
| 4325 | 2015-01-07_ | _EPI_ISL_186590_ | _A/England/50300044/2015_  | Galiano_Monica_  |
| 4326 | 2015-01-07_ | _EPI_ISL_192164_ | _A/Kazakhstan/112/2015_    | Garten_Rebecca_  |
| 4327 | 2015-01-08_ | _EPI_ISL_172753_ | _A/Utah/02/2015_           | Garten_Rebecca_  |
| 4328 | 2015-01-08_ | _EPI_ISL_172761_ | _A/Arkansas/01/2015_       | Garten_Rebecca_  |
| 4329 | 2015-01-08_ | _EPI_ISL_173228_ | _A/North_Carolina/05/2015_ | Garten_Rebecca_  |
| 4330 | 2015-01-08_ | _EPI_ISL_174128_ | _A/New_York/09/2015_       | Garten_Rebecca_  |
| 4331 | 2015-01-08_ | _EPI_ISL_175159_ | _A/Michigan/05/2015_       | Garten_Rebecca_  |
| 4332 | 2015-01-08_ | _EPI_ISL_175163_ | _A/Indiana/01/2015_        | Garten_Rebecca_  |
| 4333 | 2015-01-08_ | _EPI_ISL_175186_ | _A/Nevada/03/2015_         | Garten_Rebecca_  |
| 4334 | 2015-01-08_ | _EPI_ISL_176509_ | _A/Pennsylvania/10/2015_   | Garten_Rebecca_  |
| 4335 | 2015-01-08_ | _EPI_ISL_176520_ | _A/Kazakhstan/38/2015_     | Garten_Rebecca_  |
| 4336 | 2015-01-08_ | _EPI_ISL_176567_ | _A/Michigan/12/2015_       | Garten_Rebecca_  |
| 4337 | 2015-01-08_ | _EPI_ISL_176621_ | _A/Kazakhstan/39/2015_     | Garten_Rebecca_  |
| 4338 | 2015-01-08_ | _EPI_ISL_176713_ | _A/Colorado/06/2015_       | Garten_Rebecca_  |
| 4339 | 2015-01-08_ | _EPI_ISL_177428_ | _A/AOMORI/3/2015_          | Takashita_Emi_   |
| 4340 | 2015-01-08_ | _EPI_ISL_186586_ | _A/England/50280058/2015_  | Galiano_Monica_  |
| 4341 | 2015-01-08_ | _EPI_ISL_186588_ | _A/England/50300025/2015_  | Galiano_Monica_  |
| 4342 | 2015-01-08_ | _EPI_ISL_188892_ | _A/Pennsylvania/10/2015_   | Garten_Rebecca_  |
| 4343 | 2015-01-09_ | _EPI_ISL_172513_ | _A/Pennsylvania/02/2015_   | Garten_Rebecca_  |
| 4344 | 2015-01-09_ | _EPI_ISL_172747_ | _A/Montana/02/2015_        | Garten_Rebecca_  |
| 4345 | 2015-01-09_ | _EPI_ISL_173232_ | _A/Texas/06/2015_          | Garten_Rebecca_  |
| 4346 | 2015-01-09_ | _EPI_ISL_175154_ | _A/Colorado/02/2015_       | Garten_Rebecca_  |
| 4347 | 2015-01-09_ | _EPI_ISL_175199_ | _A/Nebraska/03/2015_       | Garten_Rebecca_  |
| 4348 | 2015-01-09_ | _EPI_ISL_175305_ | _A/IBARAKI/1/2015_         | Takashita_Emi_   |
| 4349 | 2015-01-09_ | _EPI_ISL_176488_ | _A/Mississippi/04/2015_    | Garten_Rebecca_  |
| 4350 | 2015-01-09_ | _EPI_ISL_176492_ | _A/Pennsylvania/07/2015_   | Garten_Rebecca_  |
| 4351 | 2015-01-09_ | _EPI_ISL_176496_ | _A/Alaska/01/2015_         | Garten_Rebecca_  |
| 4352 | 2015-01-09_ | _EPI_ISL_176497_ | _A/New_Mexico/02/2015_     | Garten_Rebecca_  |

|      |            |                  |                            |                  |
|------|------------|------------------|----------------------------|------------------|
| 4353 | 2015-01-09 | _EPI_ISL_176558_ | _A/Delaware/12/2015_       | _Garten_Rebecca_ |
| 4354 | 2015-01-09 | _EPI_ISL_176560_ | _A/Michigan/11/2015_       | _Garten_Rebecca_ |
| 4355 | 2015-01-09 | _EPI_ISL_176566_ | _A/Michigan/13/2015_       | _Garten_Rebecca_ |
| 4356 | 2015-01-09 | _EPI_ISL_186589_ | _A/England/50300033/2015_  | _Galiano_Monica_ |
| 4357 | 2015-01-09 | _EPI_ISL_186592_ | _A/England/32/2015_        | _Galiano_Monica_ |
| 4358 | 2015-01-09 | _EPI_ISL_188629_ | _A/MYAGI/12/2015_          | _Takashita_Emi_  |
| 4359 | 2015-01-09 | _EPI_ISL_188893_ | _A/Pennsylvania/07/2015_   | _Garten_Rebecca_ |
| 4360 | 2015-01-09 | _EPI_ISL_189841_ | _A/Kazakhstan/159/2015_    | _Garten_Rebecca_ |
| 4361 | 2015-01-09 | _EPI_ISL_194159_ | _A/El_Salvador/49/2015_    | _Garten_Rebecca_ |
| 4362 | 2015-01-09 | _EPI_ISL_202415_ | _A/Kyrgyzstan/10/2015_     | _Garten_Rebecca_ |
| 4363 | 2015-01-10 | _EPI_ISL_174170_ | _A/Arkansas/02/2015_       | _Garten_Rebecca_ |
| 4364 | 2015-01-10 | _EPI_ISL_176322_ | _A/Gunma/14G002/2015_      | _Hiroki_Kondo_   |
| 4365 | 2015-01-10 | _EPI_ISL_176495_ | _A/Texas/13/2015_          | _Garten_Rebecca_ |
| 4366 | 2015-01-10 | _EPI_ISL_176499_ | _A/Hawaii/04/2015_         | _Garten_Rebecca_ |
| 4367 | 2015-01-10 | _EPI_ISL_176506_ | _A/Texas/12/2015_          | _Garten_Rebecca_ |
| 4368 | 2015-01-10 | _EPI_ISL_176554_ | _A/Wisconsin/10/2015_      | _Garten_Rebecca_ |
| 4369 | 2015-01-10 | _EPI_ISL_177414_ | _A/SAPPORO/6/2015_         | _Takashita_Emi_  |
| 4370 | 2015-01-11 | _EPI_ISL_172603_ | _A/Florida/05/2015_        | _Garten_Rebecca_ |
| 4371 | 2015-01-11 | _EPI_ISL_172807_ | _A/Florida/13/2015_        | _Garten_Rebecca_ |
| 4372 | 2015-01-11 | _EPI_ISL_173099_ | _A/NIIGATA/35/2015_        | _Takashita_Emi_  |
| 4373 | 2015-01-11 | _EPI_ISL_173246_ | _A/Tennessee/01/2015_      | _Garten_Rebecca_ |
| 4374 | 2015-01-11 | _EPI_ISL_176508_ | _A/New_Mexico/04/2015_     | _Garten_Rebecca_ |
| 4375 | 2015-01-11 | _EPI_ISL_176510_ | _A/New_Hampshire/10/2015_  | _Garten_Rebecca_ |
| 4376 | 2015-01-11 | _EPI_ISL_176555_ | _A/Wisconsin/11/2015_      | _Garten_Rebecca_ |
| 4377 | 2015-01-11 | _EPI_ISL_191065_ | _A/New_Hampshire/09/2015_  | _Garten_Rebecca_ |
| 4378 | 2015-01-11 | _EPI_ISL_192183_ | _A/Minnesota/05/2015_      | _Garten_Rebecca_ |
| 4379 | 2015-01-11 | _EPI_ISL_195893_ | _A/Oregon/10/2015_         | _Garten_Rebecca_ |
| 4380 | 2015-01-12 | _EPI_ISL_172915_ | _A/Gavle/1/2015_           | _Brytting_Maria_ |
| 4381 | 2015-01-12 | _EPI_ISL_172918_ | _A/Lund/1/2015_            | _Brytting_Maria_ |
| 4382 | 2015-01-12 | _EPI_ISL_174143_ | _A/Utah/03/2015_           | _Garten_Rebecca_ |
| 4383 | 2015-01-12 | _EPI_ISL_175164_ | _A/Utah/05/2015_           | _Garten_Rebecca_ |
| 4384 | 2015-01-12 | _EPI_ISL_176491_ | _A/Michigan/09/2015_       | _Garten_Rebecca_ |
| 4385 | 2015-01-12 | _EPI_ISL_176537_ | _A/Massachusetts/05/2015_  | _Garten_Rebecca_ |
| 4386 | 2015-01-12 | _EPI_ISL_176550_ | _A/West_Virginia/03/2015_  | _Garten_Rebecca_ |
| 4387 | 2015-01-12 | _EPI_ISL_176552_ | _A/Washington/08/2015_     | _Garten_Rebecca_ |
| 4388 | 2015-01-12 | _EPI_ISL_186591_ | _A/England/50320276/2015_  | _Galiano_Monica_ |
| 4389 | 2015-01-12 | _EPI_ISL_186593_ | _A/England/57/2015_        | _Galiano_Monica_ |
| 4390 | 2015-01-12 | _EPI_ISL_186598_ | _A/England/50380052/2015_  | _Galiano_Monica_ |
| 4391 | 2015-01-12 | _EPI_ISL_188851_ | _A/England/77/2015_        | _Galiano_Monica_ |
| 4392 | 2015-01-12 | _EPI_ISL_192162_ | _A/Kazakhstan/873/2015_    | _Garten_Rebecca_ |
| 4393 | 2015-01-13 | _EPI_ISL_172929_ | _A/Stockholm/7/2015_       | _Brytting_Maria_ |
| 4394 | 2015-01-13 | _EPI_ISL_173222_ | _A/North_Carolina/04/2015_ | _Garten_Rebecca_ |
| 4395 | 2015-01-13 | _EPI_ISL_174160_ | _A/New_Hampshire/04/2015_  | _Garten_Rebecca_ |
| 4396 | 2015-01-13 | _EPI_ISL_175242_ | _A/Kazakhstan/32/2015_     | _Garten_Rebecca_ |
| 4397 | 2015-01-13 | _EPI_ISL_175243_ | _A/Kazakhstan/42/2015_     | _Garten_Rebecca_ |
| 4398 | 2015-01-13 | _EPI_ISL_175244_ | _A/Kazakhstan/36/2015_     | _Garten_Rebecca_ |
| 4399 | 2015-01-13 | _EPI_ISL_175246_ | _A/Kazakhstan/13/2015_     | _Garten_Rebecca_ |
| 4400 | 2015-01-13 | _EPI_ISL_175247_ | _A/Kazakhstan/05/2015_     | _Garten_Rebecca_ |
| 4401 | 2015-01-13 | _EPI_ISL_175249_ | _A/Kazakhstan/03/2015_     | _Garten_Rebecca_ |
| 4402 | 2015-01-13 | _EPI_ISL_175250_ | _A/Kazakhstan/49/2015_     | _Garten_Rebecca_ |
| 4403 | 2015-01-13 | _EPI_ISL_176312_ | _A/Niigata/14F002/2015_    | _Hiroki_Kondo_   |
| 4404 | 2015-01-13 | _EPI_ISL_176313_ | _A/Niigata/14F004/2015_    | _Hiroki_Kondo_   |
| 4405 | 2015-01-13 | _EPI_ISL_176314_ | _A/Niigata/14F005/2015_    | _Hiroki_Kondo_   |
| 4406 | 2015-01-13 | _EPI_ISL_176315_ | _A/Niigata/14F007/2015_    | _Hiroki_Kondo_   |
| 4407 | 2015-01-13 | _EPI_ISL_176316_ | _A/Niigata/14F009/2015_    | _Hiroki_Kondo_   |
| 4408 | 2015-01-13 | _EPI_ISL_176323_ | _A/Gunma/14G003/2015_      | _Hiroki_Kondo_   |
| 4409 | 2015-01-13 | _EPI_ISL_176324_ | _A/Gunma/14G004/2015_      | _Hiroki_Kondo_   |
| 4410 | 2015-01-13 | _EPI_ISL_176325_ | _A/Gunma/14G005/2015_      | _Hiroki_Kondo_   |
| 4411 | 2015-01-13 | _EPI_ISL_176489_ | _A/Florida/22/2015_        | _Garten_Rebecca_ |
| 4412 | 2015-01-13 | _EPI_ISL_176517_ | _A/Kazakhstan/951/2015_    | _Garten_Rebecca_ |
| 4413 | 2015-01-13 | _EPI_ISL_176518_ | _A/Kazakhstan/37/2015_     | _Garten_Rebecca_ |
| 4414 | 2015-01-13 | _EPI_ISL_176519_ | _A/Kazakhstan/47/2015_     | _Garten_Rebecca_ |
| 4415 | 2015-01-13 | _EPI_ISL_176524_ | _A/Iowa/05/2015_           | _Garten_Rebecca_ |
| 4416 | 2015-01-13 | _EPI_ISL_176549_ | _A/Washington/03/2015_     | _Garten_Rebecca_ |
| 4417 | 2015-01-13 | _EPI_ISL_176553_ | _A/Texas/22/2015_          | _Garten_Rebecca_ |
| 4418 | 2015-01-13 | _EPI_ISL_176565_ | _A/Texas/20/2015_          | _Garten_Rebecca_ |
| 4419 | 2015-01-13 | _EPI_ISL_176720_ | _A/North_Carolina/10/2015_ | _Garten_Rebecca_ |
| 4420 | 2015-01-13 | _EPI_ISL_176721_ | _A/Indiana/03/2015_        | _Garten_Rebecca_ |
| 4421 | 2015-01-13 | _EPI_ISL_176742_ | _A/Minnesota/03/2015_      | _Garten_Rebecca_ |
| 4422 | 2015-01-13 | _EPI_ISL_176861_ | _A/Okinawa/14T004/2015_    | _Hiroki_Kondo_   |
| 4423 | 2015-01-13 | _EPI_ISL_186594_ | _A/England/50360024/2015_  | _Galiano_Monica_ |
| 4424 | 2015-01-13 | _EPI_ISL_186596_ | _A/England/60/2015_        | _Galiano_Monica_ |
| 4425 | 2015-01-13 | _EPI_ISL_188847_ | _A/England/50320294/2015_  | _Galiano_Monica_ |
| 4426 | 2015-01-13 | _EPI_ISL_189844_ | _A/Kazakhstan/266/2015_    | _Garten_Rebecca_ |
| 4427 | 2015-01-13 | _EPI_ISL_192171_ | _A/Kazakhstan/122/2015_    | _Garten_Rebecca_ |
| 4428 | 2015-01-13 | _EPI_ISL_192173_ | _A/Kazakhstan/113/2015_    | _Garten_Rebecca_ |
| 4429 | 2015-01-13 | _EPI_ISL_195898_ | _A/Texas/22/2015_          | _Garten_Rebecca_ |
| 4430 | 2015-01-14 | _EPI_ISL_172914_ | _A/Sweden/4/2015_          | _Brytting_Maria_ |
| 4431 | 2015-01-14 | _EPI_ISL_174189_ | _A/North_Carolina/07/2015_ | _Garten_Rebecca_ |
| 4432 | 2015-01-14 | _EPI_ISL_175187_ | _A/Nevada/02/2015_         | _Garten_Rebecca_ |
| 4433 | 2015-01-14 | _EPI_ISL_176326_ | _A/Gunma/14G008/2015_      | _Hiroki_Kondo_   |
| 4434 | 2015-01-14 | _EPI_ISL_176534_ | _A/Nebraska/07/2015_       | _Garten_Rebecca_ |
| 4435 | 2015-01-14 | _EPI_ISL_176551_ | _A/Washington/17/2015_     | _Garten_Rebecca_ |
| 4436 | 2015-01-14 | _EPI_ISL_176561_ | _A/Texas/21/2015_          | _Garten_Rebecca_ |
| 4437 | 2015-01-14 | _EPI_ISL_176563_ | _A/Kansas/05/2015_         | _Garten_Rebecca_ |
| 4438 | 2015-01-14 | _EPI_ISL_176569_ | _A/Illinois/02/2015_       | _Garten_Rebecca_ |
| 4439 | 2015-01-14 | _EPI_ISL_176714_ | _A/Colorado/07/2015_       | _Garten_Rebecca_ |
| 4440 | 2015-01-14 | _EPI_ISL_176855_ | _A/Gunma/14G011/2015_      | _Hiroki_Kondo_   |
| 4441 | 2015-01-14 | _EPI_ISL_176858_ | _A/Nagasaki/14N039/2015_   | _Hiroki_Kondo_   |
| 4442 | 2015-01-14 | _EPI_ISL_186595_ | _A/England/50360027/2015_  | _Galiano_Monica_ |
| 4443 | 2015-01-14 | _EPI_ISL_186597_ | _A/England/50360038/2015_  | _Galiano_Monica_ |
| 4444 | 2015-01-14 | _EPI_ISL_189847_ | _A/Kazakhstan/161/2015_    | _Garten_Rebecca_ |
| 4445 | 2015-01-14 | _EPI_ISL_194169_ | _A/Laos/046/2015_          | _Garten_Rebecca_ |
| 4446 | 2015-01-14 | _EPI_ISL_194170_ | _A/Laos/052/2015_          | _Garten_Rebecca_ |
| 4447 | 2015-01-14 | _EPI_ISL_195890_ | _A/California/53/2015_     | _Garten_Rebecca_ |
| 4448 | 2015-01-14 | _EPI_ISL_196619_ | _A/OKAYAMA/2/2015_         | _Takashita_Emi_  |
| 4449 | 2015-01-15 | _EPI_ISL_174168_ | _A/Missouri/04/2015_       | _Garten_Rebecca_ |
| 4450 | 2015-01-15 | _EPI_ISL_176490_ | _A/Mississippi/05/2015_    | _Garten_Rebecca_ |
| 4451 | 2015-01-15 | _EPI_ISL_176522_ | _A/Iowa/06/2015_           | _Garten_Rebecca_ |
| 4452 | 2015-01-15 | _EPI_ISL_176536_ | _A/Missouri/07/2015_       | _Garten_Rebecca_ |
| 4453 | 2015-01-15 | _EPI_ISL_176557_ | _A/Delaware/14/2015_       | _Garten_Rebecca_ |
| 4454 | 2015-01-15 | _EPI_ISL_176564_ | _A/Kansas/06/2015_         | _Garten_Rebecca_ |
| 4455 | 2015-01-15 | _EPI_ISL_176573_ | _A/Michigan/08/2015_       | _Garten_Rebecca_ |
| 4456 | 2015-01-15 | _EPI_ISL_176575_ | _A/Michigan/10/2015_       | _Garten_Rebecca_ |
| 4457 | 2015-01-15 | _EPI_ISL_176718_ | _A/North_Dakota/04/2015_   | _Garten_Rebecca_ |
| 4458 | 2015-01-15 | _EPI_ISL_176719_ | _A/Wyoming/02/2015_        | _Garten_Rebecca_ |
| 4459 | 2015-01-15 | _EPI_ISL_176751_ | _A/Florida/25/2015_        | _Garten_Rebecca_ |
| 4460 | 2015-01-15 | _EPI_ISL_186599_ | _A/England/72/2015_        | _Galiano_Monica_ |
| 4461 | 2015-01-15 | _EPI_ISL_186601_ | _A/England/50400282/2015_  | _Galiano_Monica_ |
| 4462 | 2015-01-15 | _EPI_ISL_186602_ | _A/England/50400284/2015_  | _Galiano_Monica_ |
| 4463 | 2015-01-15 | _EPI_ISL_188850_ | _A/England/50400281/2015_  | _Galiano_Monica_ |
| 4464 | 2015-01-15 | _EPI_ISL_192248_ | _A/ENG/50400311/2015_      | _Galiano_Monica_ |
| 4465 | 2015-01-15 | _EPI_ISL_192249_ | _A/ENG/75/2015_            | _Galiano_Monica_ |
| 4466 | 2015-01-15 | _EPI_ISL_192250_ | _A/ENG/50400317/2015_      | _Galiano_Monica_ |
| 4467 | 2015-01-15 | _EPI_ISL_197521_ | _A/Chiba/61/2014_          | _Garten_Rebecca_ |
| 4468 | 2015-01-15 | _EPI_ISL_197545_ | _A/Chiba/61/2014_          | _Garten_Rebecca_ |
| 4469 | 2015-01-16 | _EPI_ISL_176625_ | _A/Maine/15/2015_          | _Garten_Rebecca_ |
| 4470 | 2015-01-16 | _EPI_ISL_176627_ | _A/Maine/13/2015_          | _Garten_Rebecca_ |
| 4471 | 2015-01-16 | _EPI_ISL_176628_ | _A/Maine/14/2015_          | _Garten_Rebecca_ |
| 4472 | 2015-01-16 | _EPI_ISL_176697_ | _A/Kansas/07/2015_         | _Garten_Rebecca_ |
| 4473 | 2015-01-16 | _EPI_ISL_176708_ | _A/Ohio/01/2015_           | _Garten_Rebecca_ |

|      |            |                  |                            |                  |
|------|------------|------------------|----------------------------|------------------|
| 4474 | 2015-01-16 | _EPI_ISL_176716_ | _A/Kentucky/03/2015_       | _Garten_Rebecca_ |
| 4475 | 2015-01-16 | _EPI_ISL_179013_ | _A/Columbia/4352/2015_     | _Garten_Rebecca_ |
| 4476 | 2015-01-16 | _EPI_ISL_186600_ | _A/England/50400278/2015_  | _Galiano_Monica_ |
| 4477 | 2015-01-16 | _EPI_ISL_188874_ | _A/Michigan/22/2015_       | _Garten_Rebecca_ |
| 4478 | 2015-01-16 | _EPI_ISL_191056_ | _A/Khabarovsk/05/2015_     | _Garten_Rebecca_ |
| 4479 | 2015-01-16 | _EPI_ISL_191962_ | _A/Kazakhstan/123/2015_    | _Garten_Rebecca_ |
| 4480 | 2015-01-16 | _EPI_ISL_194178_ | _A/Khabarovsk/04/2015_     | _Garten_Rebecca_ |
| 4481 | 2015-01-17 | _EPI_ISL_175156_ | _A/Michigan/07/2015_       | _Garten_Rebecca_ |
| 4482 | 2015-01-17 | _EPI_ISL_175198_ | _A/Maine/07/2015_          | _Garten_Rebecca_ |
| 4483 | 2015-01-17 | _EPI_ISL_176709_ | _A/Ohio/02/2015_           | _Garten_Rebecca_ |
| 4484 | 2015-01-17 | _EPI_ISL_177417_ | _A/KANAGAWA/15/2015_       | _Takashita_Emi_  |
| 4485 | 2015-01-17 | _EPI_ISL_192166_ | _A/St_Petersburg/03/2015_  | _Garten_Rebecca_ |
| 4486 | 2015-01-17 | _EPI_ISL_194155_ | _A/New_Mexico/21/2015_     | _Garten_Rebecca_ |
| 4487 | 2015-01-18 | _EPI_ISL_173238_ | _A/Florida/14/2015_        | _Garten_Rebecca_ |
| 4488 | 2015-01-18 | _EPI_ISL_174155_ | _A/Montana/04/2015_        | _Garten_Rebecca_ |
| 4489 | 2015-01-18 | _EPI_ISL_175161_ | _A/Kansas/03/2015_         | _Garten_Rebecca_ |
| 4490 | 2015-01-18 | _EPI_ISL_176731_ | _A/New_Mexico/09/2015_     | _Garten_Rebecca_ |
| 4491 | 2015-01-18 | _EPI_ISL_176744_ | _A/Hawaii/05/2015_         | _Garten_Rebecca_ |
| 4492 | 2015-01-18 | _EPI_ISL_194130_ | _A/Indiana/04/2015_        | _Garten_Rebecca_ |
| 4493 | 2015-01-18 | _EPI_ISL_199509_ | _A/Columbia/235/2015_      | _Garten_Rebecca_ |
| 4494 | 2015-01-19 | _EPI_ISL_175167_ | _A/New_Jersey/03/2015_     | _Garten_Rebecca_ |
| 4495 | 2015-01-19 | _EPI_ISL_176630_ | _A/Delaware/16/2015_       | _Garten_Rebecca_ |
| 4496 | 2015-01-19 | _EPI_ISL_176675_ | _A/New_Mexico/08/2015_     | _Garten_Rebecca_ |
| 4497 | 2015-01-19 | _EPI_ISL_176678_ | _A/Texas/26/2015_          | _Garten_Rebecca_ |
| 4498 | 2015-01-19 | _EPI_ISL_176702_ | _A/Wisconsin/18/2015_      | _Garten_Rebecca_ |
| 4499 | 2015-01-19 | _EPI_ISL_176705_ | _A/Utah/10/2015_           | _Garten_Rebecca_ |
| 4500 | 2015-01-19 | _EPI_ISL_176852_ | _A/Niigata/14F067/2015_    | _Hiroki_Kondo_   |
| 4501 | 2015-01-19 | _EPI_ISL_188873_ | _A/Michigan/21/2015_       | _Garten_Rebecca_ |
| 4502 | 2015-01-19 | _EPI_ISL_194134_ | _A/Rhode_Island/07/2015_   | _Garten_Rebecca_ |
| 4503 | 2015-01-19 | _EPI_ISL_194148_ | _A/Nevada/07/2015_         | _Garten_Rebecca_ |
| 4504 | 2015-01-19 | _EPI_ISL_194179_ | _A/New_Jersey/40/2015_     | _Garten_Rebecca_ |
| 4505 | 2015-01-19 | _EPI_ISL_194180_ | _A/Virginia/09/2015_       | _Garten_Rebecca_ |
| 4506 | 2015-01-20 | _EPI_ISL_174163_ | _A/Massachusetts/02/2015_  | _Garten_Rebecca_ |
| 4507 | 2015-01-20 | _EPI_ISL_175207_ | _A/Massachusetts/03/2015_  | _Garten_Rebecca_ |
| 4508 | 2015-01-20 | _EPI_ISL_175313_ | _A/TOKYO/41945/2015_       | _Takashita_Emi_  |
| 4509 | 2015-01-20 | _EPI_ISL_176674_ | _A/New_Mexico/07/2015_     | _Garten_Rebecca_ |
| 4510 | 2015-01-20 | _EPI_ISL_176676_ | _A/Arkansas/05/2015_       | _Garten_Rebecca_ |
| 4511 | 2015-01-20 | _EPI_ISL_176707_ | _A/Florida/24/2015_        | _Garten_Rebecca_ |
| 4512 | 2015-01-20 | _EPI_ISL_176747_ | _A/California/20/2015_     | _Garten_Rebecca_ |
| 4513 | 2015-01-20 | _EPI_ISL_176862_ | _A/Okinawa/14T006/2015_    | _Hiroki_Kondo_   |
| 4514 | 2015-01-20 | _EPI_ISL_191054_ | _A/Khabarovsk/06/2015_     | _Garten_Rebecca_ |
| 4515 | 2015-01-20 | _EPI_ISL_191057_ | _A/Khabarovsk/07/2015_     | _Garten_Rebecca_ |
| 4516 | 2015-01-20 | _EPI_ISL_194132_ | _A/Virginia/10/2015_       | _Garten_Rebecca_ |
| 4517 | 2015-01-20 | _EPI_ISL_194156_ | _A/Khabarovsk/11/2015_     | _Garten_Rebecca_ |
| 4518 | 2015-01-20 | _EPI_ISL_194160_ | _A/El_Salvador/63/2015_    | _Garten_Rebecca_ |
| 4519 | 2015-01-20 | _EPI_ISL_194181_ | _A/Khabarovsk/07/2015_     | _Garten_Rebecca_ |
| 4520 | 2015-01-21 | _EPI_ISL_173241_ | _A/Washington/01/2015_     | _Garten_Rebecca_ |
| 4521 | 2015-01-21 | _EPI_ISL_175315_ | _A/IWATE/7/2015_           | _Takashita_Emi_  |
| 4522 | 2015-01-21 | _EPI_ISL_176677_ | _A/Arkansas/04/2015_       | _Garten_Rebecca_ |
| 4523 | 2015-01-21 | _EPI_ISL_176679_ | _A/Texas/24/2015_          | _Garten_Rebecca_ |
| 4524 | 2015-01-21 | _EPI_ISL_176681_ | _A/Texas/23/2015_          | _Garten_Rebecca_ |
| 4525 | 2015-01-21 | _EPI_ISL_176682_ | _A/Texas/28/2015_          | _Garten_Rebecca_ |
| 4526 | 2015-01-21 | _EPI_ISL_176706_ | _A/Florida/21/2015_        | _Garten_Rebecca_ |
| 4527 | 2015-01-21 | _EPI_ISL_176710_ | _A/Ohio/03/2015_           | _Garten_Rebecca_ |
| 4528 | 2015-01-21 | _EPI_ISL_177541_ | _A/Washington/18/2015_     | _Garten_Rebecca_ |
| 4529 | 2015-01-21 | _EPI_ISL_188885_ | _A/Indiana/06/2015_        | _Garten_Rebecca_ |
| 4530 | 2015-01-21 | _EPI_ISL_189849_ | _A/Kazakhstan/274/2015_    | _Garten_Rebecca_ |
| 4531 | 2015-01-22 | _EPI_ISL_174149_ | _A/New_Hampshire/05/2015_  | _Garten_Rebecca_ |
| 4532 | 2015-01-22 | _EPI_ISL_174161_ | _A/New_York/04/2015_       | _Garten_Rebecca_ |
| 4533 | 2015-01-22 | _EPI_ISL_175206_ | _A/New_York/12/2015_       | _Garten_Rebecca_ |
| 4534 | 2015-01-22 | _EPI_ISL_176643_ | _A/West_Virginia/06/2015_  | _Garten_Rebecca_ |
| 4535 | 2015-01-22 | _EPI_ISL_176703_ | _A/Wisconsin/19/2015_      | _Garten_Rebecca_ |
| 4536 | 2015-01-22 | _EPI_ISL_176717_ | _A/Kentucky/04/2015_       | _Garten_Rebecca_ |
| 4537 | 2015-01-22 | _EPI_ISL_176863_ | _A/Okinawa/14T007/2015_    | _Hiroki_Kondo_   |
| 4538 | 2015-01-22 | _EPI_ISL_177525_ | _A/Alabama/04/2015_        | _Garten_Rebecca_ |
| 4539 | 2015-01-22 | _EPI_ISL_178982_ | _A/Maryland/01/2015_       | _Garten_Rebecca_ |
| 4540 | 2015-01-22 | _EPI_ISL_186603_ | _A/England/87/2015_        | _Galiano_Monica_ |
| 4541 | 2015-01-22 | _EPI_ISL_194147_ | _A/Wyoming/14/2015_        | _Garten_Rebecca_ |
| 4542 | 2015-01-22 | _EPI_ISL_194150_ | _A/Colorado/09/2015_       | _Garten_Rebecca_ |
| 4543 | 2015-01-22 | _EPI_ISL_197505_ | _A/Hyogo/4001/2014_        | _Garten_Rebecca_ |
| 4544 | 2015-01-22 | _EPI_ISL_197565_ | _A/Hyogo/4001/2014_        | _Garten_Rebecca_ |
| 4545 | 2015-01-23 | _EPI_ISL_176623_ | _A/New_York/18/2015_       | _Garten_Rebecca_ |
| 4546 | 2015-01-23 | _EPI_ISL_176673_ | _A/Nevada/15/2015_         | _Garten_Rebecca_ |
| 4547 | 2015-01-23 | _EPI_ISL_189848_ | _A/Kazakhstan/158/2015_    | _Garten_Rebecca_ |
| 4548 | 2015-01-23 | _EPI_ISL_194145_ | _A/Montana/09/2015_        | _Garten_Rebecca_ |
| 4549 | 2015-01-23 | _EPI_ISL_194149_ | _A/Nevada/32/2015_         | _Garten_Rebecca_ |
| 4550 | 2015-01-23 | _EPI_ISL_200698_ | _A/Acre/133946-IEC/2015_   | _Garten_Rebecca_ |
| 4551 | 2015-01-24 | _EPI_ISL_176511_ | _A/Delaware/09/2015_       | _Garten_Rebecca_ |
| 4552 | 2015-01-24 | _EPI_ISL_176629_ | _A/Missouri/09/2015_       | _Garten_Rebecca_ |
| 4553 | 2015-01-24 | _EPI_ISL_176680_ | _A/Texas/29/2015_          | _Garten_Rebecca_ |
| 4554 | 2015-01-24 | _EPI_ISL_178983_ | _A/Maryland/02/2015_       | _Garten_Rebecca_ |
| 4555 | 2015-01-24 | _EPI_ISL_194141_ | _A/Nevada/33/2015_         | _Garten_Rebecca_ |
| 4556 | 2015-01-24 | _EPI_ISL_194176_ | _A/Missouri/11/2015_       | _Garten_Rebecca_ |
| 4557 | 2015-01-25 | _EPI_ISL_172930_ | _A/Stockholm/8/2015_       | _Brytting_Maria_ |
| 4558 | 2015-01-25 | _EPI_ISL_176644_ | _A/West_Virginia/07/2015_  | _Garten_Rebecca_ |
| 4559 | 2015-01-25 | _EPI_ISL_181075_ | _A/North_Carolina/25/2015_ | _Garten_Rebecca_ |
| 4560 | 2015-01-26 | _EPI_ISL_175220_ | _A/New_Jersey/02/2015_     | _Garten_Rebecca_ |
| 4561 | 2015-01-26 | _EPI_ISL_176633_ | _A/Texas/34/2015_          | _Garten_Rebecca_ |
| 4562 | 2015-01-26 | _EPI_ISL_176634_ | _A/Texas/32/2015_          | _Garten_Rebecca_ |
| 4563 | 2015-01-26 | _EPI_ISL_176635_ | _A/Texas/30/2015_          | _Garten_Rebecca_ |
| 4564 | 2015-01-26 | _EPI_ISL_176640_ | _A/New_Jersey/09/2015_     | _Garten_Rebecca_ |
| 4565 | 2015-01-26 | _EPI_ISL_176641_ | _A/New_Jersey/10/2015_     | _Garten_Rebecca_ |
| 4566 | 2015-01-26 | _EPI_ISL_176684_ | _A/Idaho/04/2015_          | _Garten_Rebecca_ |
| 4567 | 2015-01-26 | _EPI_ISL_176853_ | _A/Niigata/14F197/2015_    | _Hiroki_Kondo_   |
| 4568 | 2015-01-26 | _EPI_ISL_177530_ | _A/Florida/17/2015_        | _Garten_Rebecca_ |
| 4569 | 2015-01-26 | _EPI_ISL_186604_ | _A/England/50520248/2015_  | _Galiano_Monica_ |
| 4570 | 2015-01-26 | _EPI_ISL_186605_ | _A/England/105/2015_       | _Galiano_Monica_ |
| 4571 | 2015-01-26 | _EPI_ISL_186607_ | _A/England/105/2015_       | _Galiano_Monica_ |
| 4572 | 2015-01-26 | _EPI_ISL_186607_ | _A/England/112/2015_       | _Galiano_Monica_ |
| 4573 | 2015-01-26 | _EPI_ISL_186607_ | _A/England/112/2015_       | _Galiano_Monica_ |
| 4574 | 2015-01-26 | _EPI_ISL_188867_ | _A/Wisconsin/27/2015_      | _Garten_Rebecca_ |
| 4575 | 2015-01-26 | _EPI_ISL_188880_ | _A/Alabama/02/2015_        | _Garten_Rebecca_ |
| 4576 | 2015-01-26 | _EPI_ISL_189843_ | _A/Kazakhstan/184/2015_    | _Garten_Rebecca_ |
| 4577 | 2015-01-26 | _EPI_ISL_192167_ | _A/St_Petersburg/22/2015_  | _Garten_Rebecca_ |
| 4578 | 2015-01-26 | _EPI_ISL_194161_ | _A/Nevada/23/2015_         | _Garten_Rebecca_ |
| 4579 | 2015-01-26 | _EPI_ISL_194183_ | _A/Wisconsin/30/2015_      | _Garten_Rebecca_ |
| 4580 | 2015-01-26 | _EPI_ISL_195891_ | _A/Massachusetts/12/2015_  | _Garten_Rebecca_ |
| 4581 | 2015-01-26 | _EPI_ISL_197519_ | _A/Buryatia/19/2015_       | _Garten_Rebecca_ |
| 4582 | 2015-01-26 | _EPI_ISL_200721_ | _A/Omsk/141/2015_          | _Garten_Rebecca_ |
| 4583 | 2015-01-27 | _EPI_ISL_172931_ | _A/Stockholm/9/2015_       | _Brytting_Maria_ |
| 4584 | 2015-01-27 | _EPI_ISL_175192_ | _A/Wisconsin/05/2015_      | _Garten_Rebecca_ |
| 4585 | 2015-01-27 | _EPI_ISL_175252_ | _A/Pennsylvania/04/2015_   | _Garten_Rebecca_ |
| 4586 | 2015-01-27 | _EPI_ISL_176638_ | _A/Texas/33/2015_          | _Garten_Rebecca_ |
| 4587 | 2015-01-27 | _EPI_ISL_176639_ | _A/Texas/31/2015_          | _Garten_Rebecca_ |
| 4588 | 2015-01-27 | _EPI_ISL_176683_ | _A/Washington/06/2015_     | _Garten_Rebecca_ |
| 4589 | 2015-01-27 | _EPI_ISL_176735_ | _A/California/19/2015_     | _Garten_Rebecca_ |
| 4590 | 2015-01-27 | _EPI_ISL_181074_ | _A/North_Carolina/24/2015_ | _Garten_Rebecca_ |
| 4591 | 2015-01-27 | _EPI_ISL_181077_ | _A/Tennessee/10/2015_      | _Garten_Rebecca_ |
| 4592 | 2015-01-27 | _EPI_ISL_188858_ | _A/England/50960083/2015_  | _Galiano_Monica_ |
| 4593 | 2015-01-27 | _EPI_ISL_191963_ | _A/Kazakhstan/183/2015_    | _Garten_Rebecca_ |
| 4594 | 2015-01-27 | _EPI_ISL_200722_ | _A/Komi/99/2015_           | _Garten_Rebecca_ |

|      |             |                  |                                        |                  |
|------|-------------|------------------|----------------------------------------|------------------|
| 4595 | 2015-01-27_ | _EPI_ISL_205051_ | _A/Moscow/CRIE-141/2015_               | _EpiFluDB_       |
| 4596 | 2015-01-28_ | _EPI_ISL_173248_ | _A/North_Carolina/02/2015_             | _Garten_Rebecca_ |
| 4597 | 2015-01-28_ | _EPI_ISL_175185_ | _A/New_Hampshire/07/2015_              | _Garten_Rebecca_ |
| 4598 | 2015-01-28_ | _EPI_ISL_175227_ | _A/West_Virginia/02/2015_              | _Garten_Rebecca_ |
| 4599 | 2015-01-28_ | _EPI_ISL_175228_ | _A/Delaware/06/2015_                   | _Garten_Rebecca_ |
| 4600 | 2015-01-28_ | _EPI_ISL_176637_ | _A/Texas/27/2015_                      | _Garten_Rebecca_ |
| 4601 | 2015-01-28_ | _EPI_ISL_176690_ | _A/Idaho/05/2015_                      | _Garten_Rebecca_ |
| 4602 | 2015-01-28_ | _EPI_ISL_186608_ | _A/England/113/2015_                   | _Galiano_Monica_ |
| 4603 | 2015-01-28_ | _EPI_ISL_186608_ | _A/England/113/2015_                   | _Galiano_Monica_ |
| 4604 | 2015-01-28_ | _EPI_ISL_188878_ | _A/Washington/29/2015_                 | _Garten_Rebecca_ |
| 4605 | 2015-01-28_ | _EPI_ISL_194182_ | _A/Missouri/05/2015_                   | _Garten_Rebecca_ |
| 4606 | 2015-01-29_ | _EPI_ISL_175179_ | _A/Utah/06/2015_                       | _Garten_Rebecca_ |
| 4607 | 2015-01-29_ | _EPI_ISL_175183_ | _A/New_Hampshire/06/2015_              | _Garten_Rebecca_ |
| 4608 | 2015-01-29_ | _EPI_ISL_176743_ | _A/New_Jersey/12/2015_                 | _Garten_Rebecca_ |
| 4609 | 2015-01-29_ | _EPI_ISL_186606_ | _A/England/127/2015_                   | _Galiano_Monica_ |
| 4610 | 2015-01-29_ | _EPI_ISL_186606_ | _A/England/127/2015_                   | _Galiano_Monica_ |
| 4611 | 2015-01-29_ | _EPI_ISL_189845_ | _A/Kazakhstan/166/2015_                | _Garten_Rebecca_ |
| 4612 | 2015-01-29_ | _EPI_ISL_191682_ | _A/South_Dakota/25/2015_               | _Garten_Rebecca_ |
| 4613 | 2015-01-29_ | _EPI_ISL_193333_ | _A/South_Dakota/23/2015_               | _Garten_Rebecca_ |
| 4614 | 2015-01-29_ | _EPI_ISL_194146_ | _A/South_Dakota/22/2015_               | _Garten_Rebecca_ |
| 4615 | 2015-01-29_ | _EPI_ISL_195882_ | _A/Iowa/17/2015_                       | _Garten_Rebecca_ |
| 4616 | 2015-01-29_ | _EPI_ISL_195884_ | _A/Maine/24/2015_                      | _Garten_Rebecca_ |
| 4617 | 2015-01-30_ | _EPI_ISL_175176_ | _A/Florida/20/2015_                    | _Garten_Rebecca_ |
| 4618 | 2015-01-30_ | _EPI_ISL_175181_ | _A/Delaware/05/2015_                   | _Garten_Rebecca_ |
| 4619 | 2015-01-30_ | _EPI_ISL_175193_ | _A/Kansas/02/2015_                     | _Garten_Rebecca_ |
| 4620 | 2015-01-30_ | _EPI_ISL_175213_ | _A/Washington/04/2015_                 | _Garten_Rebecca_ |
| 4621 | 2015-01-30_ | _EPI_ISL_186609_ | _A/England/114/2015_                   | _Galiano_Monica_ |
| 4622 | 2015-01-30_ | _EPI_ISL_186609_ | _A/England/114/2015_                   | _Galiano_Monica_ |
| 4623 | 2015-01-30_ | _EPI_ISL_188852_ | _A/England/50620849/2015_              | _Galiano_Monica_ |
| 4624 | 2015-01-30_ | _EPI_ISL_188864_ | _A/Arizona/01/2015_                    | _Garten_Rebecca_ |
| 4625 | 2015-01-30_ | _EPI_ISL_188881_ | _A/Washington/30/2015_                 | _Garten_Rebecca_ |
| 4626 | 2015-01-30_ | _EPI_ISL_194129_ | _A/St_Petersburg/70/2015_              | _Garten_Rebecca_ |
| 4627 | 2015-01-30_ | _EPI_ISL_194139_ | _A/Iowa/13/2015_                       | _Garten_Rebecca_ |
| 4628 | 2015-01-30_ | _EPI_ISL_194144_ | _A/Nevada/12/2015_                     | _Garten_Rebecca_ |
| 4629 | 2015-01-30_ | _EPI_ISL_194154_ | _A/Oklahoma/15/2015_                   | _Garten_Rebecca_ |
| 4630 | 2015-01-30_ | _EPI_ISL_194177_ | _A/Kansas/09/2015_                     | _Garten_Rebecca_ |
| 4631 | 2015-01-31_ | _EPI_ISL_175226_ | _A/Nebraska/05/2015_                   | _Garten_Rebecca_ |
| 4632 | 2015-01-31_ | _EPI_ISL_191066_ | _A/Texas/56/2015_                      | _Garten_Rebecca_ |
| 4633 | 2015-01-31_ | _EPI_ISL_195872_ | _A/Missouri/12/2015_                   | _Garten_Rebecca_ |
| 4634 | 2015-01-31_ | _EPI_ISL_195895_ | _A/Iowa/12/2015_                       | _Garten_Rebecca_ |
| 4635 | 2015-02-01_ | _EPI_ISL_174008_ | _A/Sweden/8/2015_                      | _Brytting_Maria_ |
| 4636 | 2015-02-01_ | _EPI_ISL_175171_ | _A/Florida/19/2015_                    | _Garten_Rebecca_ |
| 4637 | 2015-02-01_ | _EPI_ISL_175214_ | _A/Kansas/01/2015_                     | _Garten_Rebecca_ |
| 4638 | 2015-02-01_ | _EPI_ISL_176642_ | _A/New_Hampshire/12/2015_              | _Garten_Rebecca_ |
| 4639 | 2015-02-01_ | _EPI_ISL_176664_ | _A/New_Jersey/04/2015_                 | _Garten_Rebecca_ |
| 4640 | 2015-02-01_ | _EPI_ISL_188630_ | _A/MIYAGI/21/2015_                     | _Takashita_Emi_  |
| 4641 | 2015-02-02_ | _EPI_ISL_175155_ | _A/Tennessee/09/2015_                  | _Garten_Rebecca_ |
| 4642 | 2015-02-02_ | _EPI_ISL_175157_ | _A/Tennessee/07/2015_                  | _Garten_Rebecca_ |
| 4643 | 2015-02-02_ | _EPI_ISL_175178_ | _A/Florida/18/2015_                    | _Garten_Rebecca_ |
| 4644 | 2015-02-02_ | _EPI_ISL_188628_ | _A/KANAGAWA/36/2015_                   | _Takashita_Emi_  |
| 4645 | 2015-02-02_ | _EPI_ISL_192163_ | _A/Kazakhstan/286/2015_                | _Garten_Rebecca_ |
| 4646 | 2015-02-02_ | _EPI_ISL_192708_ | _A/Laos/122/2015_                      | _Garten_Rebecca_ |
| 4647 | 2015-02-02_ | _EPI_ISL_195839_ | _A/Paisvasco/635/2015_                 | _Garten_Rebecca_ |
| 4648 | 2015-02-02_ | _EPI_ISL_195850_ | _A/Sassari/8/2015_                     | _Garten_Rebecca_ |
| 4649 | 2015-02-03_ | _EPI_ISL_175158_ | _A/Tennessee/08/2015_                  | _Garten_Rebecca_ |
| 4650 | 2015-02-03_ | _EPI_ISL_175177_ | _A/Hawaii/02/2015_                     | _Garten_Rebecca_ |
| 4651 | 2015-02-03_ | _EPI_ISL_175224_ | _A/Texas/09/2015_                      | _Garten_Rebecca_ |
| 4652 | 2015-02-03_ | _EPI_ISL_176647_ | _A/Wisconsin/15/2015_                  | _Garten_Rebecca_ |
| 4653 | 2015-02-03_ | _EPI_ISL_176688_ | _A/Iowa/09/2015_                       | _Garten_Rebecca_ |
| 4654 | 2015-02-03_ | _EPI_ISL_176722_ | _A/Tennessee/11/2015_                  | _Garten_Rebecca_ |
| 4655 | 2015-02-03_ | _EPI_ISL_178968_ | _A/North_Dakota/05/2015_               | _Garten_Rebecca_ |
| 4656 | 2015-02-03_ | _EPI_ISL_186610_ | _A/England/50660076/2015_              | _Galiano_Monica_ |
| 4657 | 2015-02-03_ | _EPI_ISL_186610_ | _A/England/50660076/2015_              | _Galiano_Monica_ |
| 4658 | 2015-02-03_ | _EPI_ISL_188853_ | _A/England/50660120/2015_              | _Galiano_Monica_ |
| 4659 | 2015-02-03_ | _EPI_ISL_191673_ | _A/South_Dakota/05/2015_               | _Garten_Rebecca_ |
| 4660 | 2015-02-04_ | _EPI_ISL_176662_ | _A/Rhode_Island/08/2015_               | _Garten_Rebecca_ |
| 4661 | 2015-02-04_ | _EPI_ISL_176663_ | _A/Virginia/04/2015_                   | _Garten_Rebecca_ |
| 4662 | 2015-02-04_ | _EPI_ISL_176685_ | _A/Texas/16/2015_                      | _Garten_Rebecca_ |
| 4663 | 2015-02-04_ | _EPI_ISL_176691_ | _A/Idaho/09/2015_                      | _Garten_Rebecca_ |
| 4664 | 2015-02-04_ | _EPI_ISL_192691_ | _A/Khabarovsk/19/2015_                 | _Garten_Rebecca_ |
| 4665 | 2015-02-04_ | _EPI_ISL_205178_ | _A/Krasnoyarsk/324/2015_               | _Garten_Rebecca_ |
| 4666 | 2015-02-05_ | _EPI_ISL_175182_ | _A/New_York/15/2015_                   | _Garten_Rebecca_ |
| 4667 | 2015-02-05_ | _EPI_ISL_175190_ | _A/Nevada/09/2015_                     | _Garten_Rebecca_ |
| 4668 | 2015-02-05_ | _EPI_ISL_175218_ | _A/Pennsylvania/03/2015_               | _Garten_Rebecca_ |
| 4669 | 2015-02-05_ | _EPI_ISL_175225_ | _A/New_York/14/2015_                   | _Garten_Rebecca_ |
| 4670 | 2015-02-05_ | _EPI_ISL_177523_ | _A/Hawaii/07/2015_                     | _Garten_Rebecca_ |
| 4671 | 2015-02-05_ | _EPI_ISL_191031_ | _A/South_Carolina/07/2015_             | _Garten_Rebecca_ |
| 4672 | 2015-02-05_ | _EPI_ISL_191055_ | _A/Florida/31/2015_                    | _Garten_Rebecca_ |
| 4673 | 2015-02-05_ | _EPI_ISL_195881_ | _A/Jordan/30024/2015_                  | _Garten_Rebecca_ |
| 4674 | 2015-02-05_ | _EPI_ISL_200683_ | _A/Ecuador/821/2015_                   | _Garten_Rebecca_ |
| 4675 | 2015-02-06_ | _EPI_ISL_175170_ | _A/Ohio/04/2015_                       | _Garten_Rebecca_ |
| 4676 | 2015-02-06_ | _EPI_ISL_175216_ | _A/Pennsylvania/05/2015_               | _Garten_Rebecca_ |
| 4677 | 2015-02-06_ | _EPI_ISL_176653_ | _A/Washington/05/2015_                 | _Garten_Rebecca_ |
| 4678 | 2015-02-06_ | _EPI_ISL_176656_ | _A/Wisconsin/08/2015_                  | _Garten_Rebecca_ |
| 4679 | 2015-02-06_ | _EPI_ISL_189846_ | _A/Kazakhstan/291/2015_                | _Garten_Rebecca_ |
| 4680 | 2015-02-06_ | _EPI_ISL_195874_ | _A/Serbia/NS1010/2015_                 | _Garten_Rebecca_ |
| 4681 | 2015-02-07_ | _EPI_ISL_176739_ | _A/New_Mexico/10/2015_                 | _Garten_Rebecca_ |
| 4682 | 2015-02-07_ | _EPI_ISL_188855_ | _A/England/50880445/2015_              | _Galiano_Monica_ |
| 4683 | 2015-02-08_ | _EPI_ISL_176686_ | _A/Texas/18/2015_                      | _Garten_Rebecca_ |
| 4684 | 2015-02-09_ | _EPI_ISL_175169_ | _A/North_Carolina/11/2015_             | _Garten_Rebecca_ |
| 4685 | 2015-02-09_ | _EPI_ISL_175219_ | _A/New_York/16/2015_                   | _Garten_Rebecca_ |
| 4686 | 2015-02-09_ | _EPI_ISL_176660_ | _A/Missouri/06/2015_                   | _Garten_Rebecca_ |
| 4687 | 2015-02-09_ | _EPI_ISL_176692_ | _A/Idaho/06/2015_                      | _Garten_Rebecca_ |
| 4688 | 2015-02-09_ | _EPI_ISL_178090_ | _A/KOCHI/15/2015_                      | _Takashita_Emi_  |
| 4689 | 2015-02-09_ | _EPI_ISL_188856_ | _A/England/50880448/2015_              | _Galiano_Monica_ |
| 4690 | 2015-02-09_ | _EPI_ISL_188887_ | _A/North_Carolina/23/2015_             | _Garten_Rebecca_ |
| 4691 | 2015-02-09_ | _EPI_ISL_191960_ | _A/Kazakhstan/1046/2015_               | _Garten_Rebecca_ |
| 4692 | 2015-02-09_ | _EPI_ISL_192168_ | _A/Kazakhstan/341/2015_                | _Garten_Rebecca_ |
| 4693 | 2015-02-09_ | _EPI_ISL_197485_ | _A/Hokkaido/06/2015_                   | _Garten_Rebecca_ |
| 4694 | 2015-02-09_ | _EPI_ISL_197544_ | _A/Hokkaido/06/2015_                   | _Garten_Rebecca_ |
| 4695 | 2015-02-10_ | _EPI_ISL_175180_ | _A/Utah/07/2015_                       | _Garten_Rebecca_ |
| 4696 | 2015-02-10_ | _EPI_ISL_175229_ | _A/New_York/13/2015_                   | _Garten_Rebecca_ |
| 4697 | 2015-02-10_ | _EPI_ISL_176657_ | _A/Wisconsin/14/2015_                  | _Garten_Rebecca_ |
| 4698 | 2015-02-10_ | _EPI_ISL_177058_ | _A/Stockholm/12/2015_                  | _Brytting_Maria_ |
| 4699 | 2015-02-10_ | _EPI_ISL_177059_ | _A/Stockholm/13/2015_                  | _Brytting_Maria_ |
| 4700 | 2015-02-10_ | _EPI_ISL_186611_ | _A/England/50740149/2015_              | _Galiano_Monica_ |
| 4701 | 2015-02-10_ | _EPI_ISL_186611_ | _A/England/50740149/2015_              | _Galiano_Monica_ |
| 4702 | 2015-02-10_ | _EPI_ISL_186612_ | _A/England/50740161/2015_              | _Galiano_Monica_ |
| 4703 | 2015-02-10_ | _EPI_ISL_186612_ | _A/England/50740161/2015_              | _Galiano_Monica_ |
| 4704 | 2015-02-10_ | _EPI_ISL_192700_ | _A/Hawaii/12/2015_                     | _Garten_Rebecca_ |
| 4705 | 2015-02-10_ | _EPI_ISL_194969_ | _A/Brazil/8004/2015_                   | _Garten_Rebecca_ |
| 4706 | 2015-02-10_ | _EPI_ISL_200715_ | _A/St_Vincent_And_Grenadines/422/2015_ | _Garten_Rebecca_ |
| 4707 | 2015-02-11_ | _EPI_ISL_176651_ | _A/New_Hampshire/18/2015_              | _Garten_Rebecca_ |
| 4708 | 2015-02-11_ | _EPI_ISL_176689_ | _A/Nevada/13/2015_                     | _Garten_Rebecca_ |
| 4709 | 2015-02-11_ | _EPI_ISL_176693_ | _A/Oklahoma/05/2015_                   | _Garten_Rebecca_ |
| 4710 | 2015-02-11_ | _EPI_ISL_176694_ | _A/Oklahoma/06/2015_                   | _Garten_Rebecca_ |
| 4711 | 2015-02-11_ | _EPI_ISL_177063_ | _A/Stockholm/17/2015_                  | _Brytting_Maria_ |
| 4712 | 2015-02-11_ | _EPI_ISL_177064_ | _A/Stockholm/18/2015_                  | _Brytting_Maria_ |
| 4713 | 2015-02-11_ | _EPI_ISL_186613_ | _A/England/50780065/2015_              | _Galiano_Monica_ |
| 4714 | 2015-02-11_ | _EPI_ISL_186613_ | _A/England/50780065/2015_              | _Galiano_Monica_ |
| 4715 | 2015-02-11_ | _EPI_ISL_188857_ | _A/England/50960080/2015_              | _Galiano_Monica_ |

|      |            |                  |                                        |                  |
|------|------------|------------------|----------------------------------------|------------------|
| 4716 | 2015-02-11 | _EPI_ISL_195902_ | _A/Brazil/96/2015_                     | _Garten_Rebecca_ |
| 4717 | 2015-02-11 | _EPI_ISL_197491_ | _A/Alabama/07/2015_                    | _Garten_Rebecca_ |
| 4718 | 2015-02-12 | _EPI_ISL_186614_ | _A/England/166/2015_                   | _Galiano_Monica_ |
| 4719 | 2015-02-12 | _EPI_ISL_186614_ | _A/England/166/2015_                   | _Galiano_Monica_ |
| 4720 | 2015-02-12 | _EPI_ISL_186615_ | _A/England/50800025/2015_              | _Galiano_Monica_ |
| 4721 | 2015-02-12 | _EPI_ISL_186615_ | _A/England/50800025/2015_              | _Galiano_Monica_ |
| 4722 | 2015-02-12 | _EPI_ISL_176695_ | _A/California/16/2015_                 | _Garten_Rebecca_ |
| 4723 | 2015-02-12 | _EPI_ISL_192258_ | _A/ENG/50800026/2015_                  | _Galiano_Monica_ |
| 4724 | 2015-02-12 | _EPI_ISL_194167_ | _A/South_Australia/09/2015_            | _Garten_Rebecca_ |
| 4725 | 2015-02-12 | _EPI_ISL_202392_ | _A/Kyrgyzstan/82/2015_                 | _Garten_Rebecca_ |
| 4726 | 2015-02-12 | _EPI_ISL_205157_ | _A/St_Vincent_And_Grenadines/423/2015_ | _Garten_Rebecca_ |
| 4727 | 2015-02-13 | _EPI_ISL_176532_ | _A/Maine/09/2015_                      | _Garten_Rebecca_ |
| 4728 | 2015-02-13 | _EPI_ISL_176652_ | _A/Wisconsin/07/2015_                  | _Garten_Rebecca_ |
| 4729 | 2015-02-13 | _EPI_ISL_176655_ | _A/Washington/16/2015_                 | _Garten_Rebecca_ |
| 4730 | 2015-02-13 | _EPI_ISL_177061_ | _A/Stockholm/15/2015_                  | _Brytting_Maria_ |
| 4731 | 2015-02-13 | _EPI_ISL_179012_ | _A/Colombia/2473/2015_                 | _Garten_Rebecca_ |
| 4732 | 2015-02-13 | _EPI_ISL_186616_ | _A/England/169/2015_                   | _Galiano_Monica_ |
| 4733 | 2015-02-13 | _EPI_ISL_186616_ | _A/England/169/2015_                   | _Galiano_Monica_ |
| 4734 | 2015-02-13 | _EPI_ISL_191677_ | _A/South_Dakota/30/2015_               | _Garten_Rebecca_ |
| 4735 | 2015-02-13 | _EPI_ISL_195852_ | _A/Italy/FVG-89/2015_                  | _Garten_Rebecca_ |
| 4736 | 2015-02-14 | _EPI_ISL_175191_ | _A/Nevada/10/2015_                     | _Garten_Rebecca_ |
| 4737 | 2015-02-14 | _EPI_ISL_176737_ | _A/Oregon/04/2015_                     | _Garten_Rebecca_ |
| 4738 | 2015-02-14 | _EPI_ISL_192175_ | _A/Kazakhstan/352/2015_                | _Garten_Rebecca_ |
| 4739 | 2015-02-14 | _EPI_ISL_193351_ | _A/Alabama/08/2015_                    | _Garten_Rebecca_ |
| 4740 | 2015-02-14 | _EPI_ISL_195889_ | _A/Jordan/30052/2015_                  | _Garten_Rebecca_ |
| 4741 | 2015-02-14 | _EPI_ISL_197486_ | _A/Alabama/09/2015_                    | _Garten_Rebecca_ |
| 4742 | 2015-02-15 | _EPI_ISL_174020_ | _A/Sweden/11/2015_                     | _Brytting_Maria_ |
| 4743 | 2015-02-15 | _EPI_ISL_174023_ | _A/Sweden/12/2015_                     | _Brytting_Maria_ |
| 4744 | 2015-02-15 | _EPI_ISL_176696_ | _A/California/12/2015_                 | _Garten_Rebecca_ |
| 4745 | 2015-02-15 | _EPI_ISL_192702_ | _A/Hawaii/15/2015_                     | _Garten_Rebecca_ |
| 4746 | 2015-02-16 | _EPI_ISL_176650_ | _A/Texas/11/2015_                      | _Garten_Rebecca_ |
| 4747 | 2015-02-16 | _EPI_ISL_178984_ | _A/Maryland/03/2015_                   | _Garten_Rebecca_ |
| 4748 | 2015-02-16 | _EPI_ISL_191959_ | _A/Kazakhstan/1060/2015_               | _Garten_Rebecca_ |
| 4749 | 2015-02-16 | _EPI_ISL_192690_ | _A/St_Petersburg/101/2015_             | _Garten_Rebecca_ |
| 4750 | 2015-02-16 | _EPI_ISL_200716_ | _A/St_Vincent_And_Grenadines/424/2015_ | _Garten_Rebecca_ |
| 4751 | 2015-02-17 | _EPI_ISL_176736_ | _A/New_York/19/2015_                   | _Garten_Rebecca_ |
| 4752 | 2015-02-17 | _EPI_ISL_177425_ | _A/HYOGO/3213/2015_                    | _Takashita_Emi_  |
| 4753 | 2015-02-17 | _EPI_ISL_179001_ | _A/Michigan/17/2015_                   | _Garten_Rebecca_ |
| 4754 | 2015-02-17 | _EPI_ISL_179011_ | _A/Colombia/4468/2015_                 | _Garten_Rebecca_ |
| 4755 | 2015-02-17 | _EPI_ISL_192715_ | _A/Hawaii/14/2015_                     | _Garten_Rebecca_ |
| 4756 | 2015-02-17 | _EPI_ISL_193308_ | _A/Arkansas/06/2015_                   | _Garten_Rebecca_ |
| 4757 | 2015-02-17 | _EPI_ISL_193311_ | _A/Indiana/13/2015_                    | _Garten_Rebecca_ |
| 4758 | 2015-02-17 | _EPI_ISL_193328_ | _A/Kentucky/11/2015_                   | _Garten_Rebecca_ |
| 4759 | 2015-02-17 | _EPI_ISL_205176_ | _A/Irkutsk/88/2015_                    | _Garten_Rebecca_ |
| 4760 | 2015-02-17 | _EPI_ISL_205177_ | _A/Irkutsk/88/2015_                    | _Garten_Rebecca_ |
| 4761 | 2015-02-18 | _EPI_ISL_176535_ | _A/Maine/10/2015_                      | _Garten_Rebecca_ |
| 4762 | 2015-02-18 | _EPI_ISL_176658_ | _A/Wisconsin/09/2015_                  | _Garten_Rebecca_ |
| 4763 | 2015-02-18 | _EPI_ISL_176724_ | _A/Washington/12/2015_                 | _Garten_Rebecca_ |
| 4764 | 2015-02-18 | _EPI_ISL_176733_ | _A/New_Hampshire/13/2015_              | _Garten_Rebecca_ |
| 4765 | 2015-02-18 | _EPI_ISL_176734_ | _A/Nevada/18/2015_                     | _Garten_Rebecca_ |
| 4766 | 2015-02-18 | _EPI_ISL_176741_ | _A/Nevada/17/2015_                     | _Garten_Rebecca_ |
| 4767 | 2015-02-18 | _EPI_ISL_176749_ | _A/Nevada/19/2015_                     | _Garten_Rebecca_ |
| 4768 | 2015-02-18 | _EPI_ISL_177060_ | _A/Stockholm/14/2015_                  | _Brytting_Maria_ |
| 4769 | 2015-02-18 | _EPI_ISL_177062_ | _A/Stockholm/16/2015_                  | _Brytting_Maria_ |
| 4770 | 2015-02-18 | _EPI_ISL_178975_ | _A/Texas/39/2015_                      | _Garten_Rebecca_ |
| 4771 | 2015-02-18 | _EPI_ISL_191958_ | _A/Kazakhstan/1075/2015_               | _Garten_Rebecca_ |
| 4772 | 2015-02-18 | _EPI_ISL_194961_ | _A/Ecuador/1670/2015_                  | _Garten_Rebecca_ |
| 4773 | 2015-02-18 | _EPI_ISL_200674_ | _A/Brazil/440/2015_                    | _Garten_Rebecca_ |
| 4774 | 2015-02-18 | _EPI_ISL_200678_ | _A/Brazil/6261/2015_                   | _Garten_Rebecca_ |
| 4775 | 2015-02-19 | _EPI_ISL_176738_ | _A/Kansas/08/2015_                     | _Garten_Rebecca_ |
| 4776 | 2015-02-19 | _EPI_ISL_181072_ | _A/Massachusetts/15/2015_              | _Garten_Rebecca_ |
| 4777 | 2015-02-19 | _EPI_ISL_191032_ | _A/California/47/2015_                 | _Garten_Rebecca_ |
| 4778 | 2015-02-19 | _EPI_ISL_192710_ | _A/Kazakhstan/1080/2015_               | _Garten_Rebecca_ |
| 4779 | 2015-02-19 | _EPI_ISL_193331_ | _A/Minnesota/23/2015_                  | _Garten_Rebecca_ |
| 4780 | 2015-02-20 | _EPI_ISL_176671_ | _A/Utah/11/2015_                       | _Garten_Rebecca_ |
| 4781 | 2015-02-20 | _EPI_ISL_192699_ | _A/St_Petersburg/103/2015_             | _Garten_Rebecca_ |
| 4782 | 2015-02-20 | _EPI_ISL_193347_ | _A/California/73/2015_                 | _Garten_Rebecca_ |
| 4783 | 2015-02-20 | _EPI_ISL_200723_ | _A/Chelyabinsk/192/2015_               | _Garten_Rebecca_ |
| 4784 | 2015-02-21 | _EPI_ISL_176750_ | _A/New_Jersey/11/2015_                 | _Garten_Rebecca_ |
| 4785 | 2015-02-21 | _EPI_ISL_197504_ | _A/New_Zealand/87/2015_                | _Garten_Rebecca_ |
| 4786 | 2015-02-22 | _EPI_ISL_176723_ | _A/Wisconsin/13/2015_                  | _Garten_Rebecca_ |
| 4787 | 2015-02-22 | _EPI_ISL_177069_ | _A/Sweden/14/2015_                     | _Brytting_Maria_ |
| 4788 | 2015-02-23 | _EPI_ISL_176667_ | _A/New_Jersey/05/2015_                 | _Garten_Rebecca_ |
| 4789 | 2015-02-23 | _EPI_ISL_176740_ | _A/Delaware/18/2015_                   | _Garten_Rebecca_ |
| 4790 | 2015-02-23 | _EPI_ISL_177093_ | _A/Malmoe/2/2015_                      | _Brytting_Maria_ |
| 4791 | 2015-02-23 | _EPI_ISL_191967_ | _A/Kazakhstan/1099/2015_               | _Garten_Rebecca_ |
| 4792 | 2015-02-23 | _EPI_ISL_193359_ | _A/Mississippi/10/2015_                | _Garten_Rebecca_ |
| 4793 | 2015-02-23 | _EPI_ISL_202423_ | _A/Luxembourg/15008843/2015_           | _Sekan_Lyudmyla_ |
| 4794 | 2015-02-24 | _EPI_ISL_176666_ | _A/Delaware/13/2015_                   | _Garten_Rebecca_ |
| 4795 | 2015-02-24 | _EPI_ISL_176732_ | _A/Wisconsin/20/2015_                  | _Garten_Rebecca_ |
| 4796 | 2015-02-24 | _EPI_ISL_177071_ | _A/Stockholm/20/2015_                  | _Brytting_Maria_ |
| 4797 | 2015-02-24 | _EPI_ISL_178969_ | _A/Kentucky/08/2015_                   | _Garten_Rebecca_ |
| 4798 | 2015-02-24 | _EPI_ISL_178972_ | _A/Kentucky/07/2015_                   | _Garten_Rebecca_ |
| 4799 | 2015-02-24 | _EPI_ISL_191681_ | _A/South_Dakota/29/2015_               | _Garten_Rebecca_ |
| 4800 | 2015-02-24 | _EPI_ISL_193352_ | _A/Michigan/27/2015_                   | _Garten_Rebecca_ |
| 4801 | 2015-02-24 | _EPI_ISL_201232_ | _A/Guadeloupe/9096/2015_               | _Garten_Rebecca_ |
| 4802 | 2015-02-25 | _EPI_ISL_176726_ | _A/Washington/13/2015_                 | _Garten_Rebecca_ |
| 4803 | 2015-02-25 | _EPI_ISL_176746_ | _A/New_York/20/2015_                   | _Garten_Rebecca_ |
| 4804 | 2015-02-25 | _EPI_ISL_177070_ | _A/Stockholm/19/2015_                  | _Brytting_Maria_ |
| 4805 | 2015-02-25 | _EPI_ISL_178979_ | _A/Massachusetts/09/2015_              | _Garten_Rebecca_ |
| 4806 | 2015-02-25 | _EPI_ISL_178990_ | _A/New_Hampshire/15/2015_              | _Garten_Rebecca_ |
| 4807 | 2015-02-25 | _EPI_ISL_192180_ | _A/Kharkov/241/2015_                   | _Garten_Rebecca_ |
| 4808 | 2015-02-25 | _EPI_ISL_192704_ | _A/Hawaii/23/2015_                     | _Garten_Rebecca_ |
| 4809 | 2015-02-25 | _EPI_ISL_200691_ | _A/Laos/218/2015_                      | _Garten_Rebecca_ |
| 4810 | 2015-02-25 | _EPI_ISL_201233_ | _A/Guadeloupe/9153/2015_               | _Garten_Rebecca_ |
| 4811 | 2015-02-26 | _EPI_ISL_178976_ | _A/Wisconsin/23/2015_                  | _Garten_Rebecca_ |
| 4812 | 2015-02-27 | _EPI_ISL_176622_ | _A/New_Mexico/06/2015_                 | _Garten_Rebecca_ |
| 4813 | 2015-02-27 | _EPI_ISL_177076_ | _A/Sweden/15/2015_                     | _Brytting_Maria_ |
| 4814 | 2015-02-27 | _EPI_ISL_178961_ | _A/Texas/38/2015_                      | _Garten_Rebecca_ |
| 4815 | 2015-02-27 | _EPI_ISL_178977_ | _A/Wisconsin/22/2015_                  | _Garten_Rebecca_ |
| 4816 | 2015-02-27 | _EPI_ISL_178991_ | _A/New_Hampshire/14/2015_              | _Garten_Rebecca_ |
| 4817 | 2015-02-27 | _EPI_ISL_191676_ | _A/South_Dakota/14/2015_               | _Garten_Rebecca_ |
| 4818 | 2015-02-27 | _EPI_ISL_192172_ | _A/Ukraine/151/2015_                   | _Garten_Rebecca_ |
| 4819 | 2015-02-27 | _EPI_ISL_197513_ | _A/Novosibirsk/64/2015_                | _Garten_Rebecca_ |
| 4820 | 2015-03-02 | _EPI_ISL_178957_ | _A/Nevada/21/2015_                     | _Garten_Rebecca_ |
| 4821 | 2015-03-02 | _EPI_ISL_178980_ | _A/Maine/17/2015_                      | _Garten_Rebecca_ |
| 4822 | 2015-03-02 | _EPI_ISL_178988_ | _A/New_Jersey/15/2015_                 | _Garten_Rebecca_ |
| 4823 | 2015-03-02 | _EPI_ISL_181071_ | _A/New_Jersey/06/2015_                 | _Garten_Rebecca_ |
| 4824 | 2015-03-02 | _EPI_ISL_181079_ | _A/Texas/19/2015_                      | _Garten_Rebecca_ |
| 4825 | 2015-03-02 | _EPI_ISL_191047_ | _A/Maine/16/2015_                      | _Garten_Rebecca_ |
| 4826 | 2015-03-02 | _EPI_ISL_191069_ | _A/Rhode_Island/13/2015_               | _Garten_Rebecca_ |
| 4827 | 2015-03-02 | _EPI_ISL_192184_ | _A/Delaware/35/2015_                   | _Garten_Rebecca_ |
| 4828 | 2015-03-02 | _EPI_ISL_192191_ | _A/Maryland/12/2015_                   | _Garten_Rebecca_ |
| 4829 | 2015-03-02 | _EPI_ISL_194166_ | _A/Fiji/02/2015_                       | _Garten_Rebecca_ |
| 4830 | 2015-03-02 | _EPI_ISL_197512_ | _A/Fuku/78/2015_                       | _Garten_Rebecca_ |
| 4831 | 2015-03-02 | _EPI_ISL_197536_ | _A/Mexico/1233/2015_                   | _Garten_Rebecca_ |
| 4832 | 2015-03-02 | _EPI_ISL_197541_ | _A/Fuku/78/2015_                       | _Garten_Rebecca_ |
| 4833 | 2015-03-02 | _EPI_ISL_205174_ | _A/Blagoveshchensk/19/2015_            | _Garten_Rebecca_ |
| 4834 | 2015-03-02 | _EPI_ISL_205175_ | _A/Blagoveshchensk/19/2015_            | _Garten_Rebecca_ |
| 4835 | 2015-03-03 | _EPI_ISL_178970_ | _A/Indiana/10/2015_                    | _Garten_Rebecca_ |
| 4836 | 2015-03-03 | _EPI_ISL_178981_ | _A/Maine/18/2015_                      | _Garten_Rebecca_ |

|      |            |                  |                                         |                   |
|------|------------|------------------|-----------------------------------------|-------------------|
| 4837 | 2015-03-03 | _EPI_ISL_178986_ | _A/Texas/37/2015_                       | _Garten_Rebecca_  |
| 4838 | 2015-03-03 | _EPI_ISL_178992_ | _A/New_Hampshire/16/2015_               | _Garten_Rebecca_  |
| 4839 | 2015-03-03 | _EPI_ISL_181073_ | _A/Kansas/04/2015_                      | _Garten_Rebecca_  |
| 4840 | 2015-03-03 | _EPI_ISL_188627_ | _A/YAMAGATA/64/2015_                    | _Takashita_Emi_   |
| 4841 | 2015-03-03 | _EPI_ISL_188859_ | _A/England/51060001/2015_               | _Galliano_Monica_ |
| 4842 | 2015-03-03 | _EPI_ISL_191033_ | _A/California/24/2015_                  | _Garten_Rebecca_  |
| 4843 | 2015-03-03 | _EPI_ISL_191043_ | _A/New_Jersey/16/2015_                  | _Garten_Rebecca_  |
| 4844 | 2015-03-03 | _EPI_ISL_192181_ | _A/California/78/2015_                  | _Garten_Rebecca_  |
| 4845 | 2015-03-03 | _EPI_ISL_192260_ | _A/ENG/51020042/2015_                   | _Galliano_Monica_ |
| 4846 | 2015-03-03 | _EPI_ISL_202847_ | _A/Jilin-Yanji/1179/2015_               | _Garten_Rebecca_  |
| 4847 | 2015-03-04 | _EPI_ISL_181078_ | _A/Wisconsin/16/2015_                   | _Garten_Rebecca_  |
| 4848 | 2015-03-04 | _EPI_ISL_191042_ | _A/Oregon/06/2015_                      | _Garten_Rebecca_  |
| 4849 | 2015-03-04 | _EPI_ISL_192706_ | _A/Hawaii/24/2015_                      | _Garten_Rebecca_  |
| 4850 | 2015-03-04 | _EPI_ISL_193357_ | _A/Maryland/13/2015_                    | _Garten_Rebecca_  |
| 4851 | 2015-03-04 | _EPI_ISL_201231_ | _A/Guadeloupe/9095/2015_                | _Garten_Rebecca_  |
| 4852 | 2015-03-05 | _EPI_ISL_177077_ | _A/Sweden/16/2015_                      | _Brytting_Maria_  |
| 4853 | 2015-03-05 | _EPI_ISL_177078_ | _A/Sweden/17/2015_                      | _Brytting_Maria_  |
| 4854 | 2015-03-05 | _EPI_ISL_177086_ | _A/Sweden/19/2015_                      | _Brytting_Maria_  |
| 4855 | 2015-03-05 | _EPI_ISL_178960_ | _A/Hawaii/08/2015_                      | _Garten_Rebecca_  |
| 4856 | 2015-03-05 | _EPI_ISL_179002_ | _A/Florida/27/2015_                     | _Garten_Rebecca_  |
| 4857 | 2015-03-05 | _EPI_ISL_191038_ | _A/Iowa/11/2015_                        | _Garten_Rebecca_  |
| 4858 | 2015-03-05 | _EPI_ISL_191671_ | _A/South_Dakota/15/2015_                | _Garten_Rebecca_  |
| 4859 | 2015-03-05 | _EPI_ISL_192159_ | _A/Massachusetts/16/2015_               | _Garten_Rebecca_  |
| 4860 | 2015-03-05 | _EPI_ISL_201229_ | _A/French_Guiana/6101/2015_             | _Garten_Rebecca_  |
| 4861 | 2015-03-05 | _EPI_ISL_205180_ | _A/Yekaterinburg/239/2015_              | _Garten_Rebecca_  |
| 4862 | 2015-03-05 | _EPI_ISL_205181_ | _A/Yekaterinburg/239/2015_              | _Garten_Rebecca_  |
| 4863 | 2015-03-06 | _EPI_ISL_178995_ | _A/Washington/21/2015_                  | _Garten_Rebecca_  |
| 4864 | 2015-03-07 | _EPI_ISL_178974_ | _A/Montana/07/2015_                     | _Garten_Rebecca_  |
| 4865 | 2015-03-07 | _EPI_ISL_188860_ | _A/England/51200124/2015_               | _Galliano_Monica_ |
| 4866 | 2015-03-07 | _EPI_ISL_192182_ | _A/California/81/2015_                  | _Garten_Rebecca_  |
| 4867 | 2015-03-07 | _EPI_ISL_201240_ | _A/Guatemala/4153/2015_                 | _Garten_Rebecca_  |
| 4868 | 2015-03-08 | _EPI_ISL_178962_ | _A/Texas/36/2015_                       | _Garten_Rebecca_  |
| 4869 | 2015-03-08 | _EPI_ISL_178963_ | _A/Oregon/05/2015_                      | _Garten_Rebecca_  |
| 4870 | 2015-03-08 | _EPI_ISL_178998_ | _A/Delaware/22/2015_                    | _Garten_Rebecca_  |
| 4871 | 2015-03-08 | _EPI_ISL_179005_ | _A/North_Dakota/06/2015_                | _Garten_Rebecca_  |
| 4872 | 2015-03-08 | _EPI_ISL_191058_ | _A/Vermont/06/2015_                     | _Garten_Rebecca_  |
| 4873 | 2015-03-08 | _EPI_ISL_191688_ | _A/Texas/61/2015_                       | _Garten_Rebecca_  |
| 4874 | 2015-03-09 | _EPI_ISL_178088_ | _A/SAPPORO/38/2015_                     | _Takashita_Emi_   |
| 4875 | 2015-03-09 | _EPI_ISL_178989_ | _A/Wisconsin/21/2015_                   | _Garten_Rebecca_  |
| 4876 | 2015-03-09 | _EPI_ISL_178994_ | _A/Wisconsin/24/2015_                   | _Garten_Rebecca_  |
| 4877 | 2015-03-09 | _EPI_ISL_193337_ | _A/El_Salvador/283/2015_                | _Garten_Rebecca_  |
| 4878 | 2015-03-09 | _EPI_ISL_202114_ | _A/Guatemala/8136/2015_                 | _Garten_Rebecca_  |
| 4879 | 2015-03-10 | _EPI_ISL_178964_ | _A/New_Mexico/12/2015_                  | _Garten_Rebecca_  |
| 4880 | 2015-03-10 | _EPI_ISL_194953_ | _A/Dominica/529/2015_                   | _Garten_Rebecca_  |
| 4881 | 2015-03-10 | _EPI_ISL_195903_ | _A/Moscow/99/2015_                      | _Garten_Rebecca_  |
| 4882 | 2015-03-11 | _EPI_ISL_178993_ | _A/Maine/20/2015_                       | _Garten_Rebecca_  |
| 4883 | 2015-03-11 | _EPI_ISL_191675_ | _A/South_Dakota/34/2015_                | _Garten_Rebecca_  |
| 4884 | 2015-03-11 | _EPI_ISL_197514_ | _A/Moscow/104/2015_                     | _Garten_Rebecca_  |
| 4885 | 2015-03-11 | _EPI_ISL_200670_ | _A/Dominican_Republic/8946/2015_        | _Garten_Rebecca_  |
| 4886 | 2015-03-11 | _EPI_ISL_202109_ | _A/Guatemala/9877/2015_                 | _Garten_Rebecca_  |
| 4887 | 2015-03-12 | _EPI_ISL_178987_ | _A/New_Jersey/14/2015_                  | _Garten_Rebecca_  |
| 4888 | 2015-03-12 | _EPI_ISL_179016_ | _A/NAGANO/2202/2015_                    | _Takashita_Emi_   |
| 4889 | 2015-03-12 | _EPI_ISL_191046_ | _A/Rhode_Island/15/2015_                | _Garten_Rebecca_  |
| 4890 | 2015-03-12 | _EPI_ISL_192187_ | _A/Washington/33/2015_                  | _Garten_Rebecca_  |
| 4891 | 2015-03-12 | _EPI_ISL_193350_ | _A/Iowa/14/2015_                        | _Garten_Rebecca_  |
| 4892 | 2015-03-12 | _EPI_ISL_197553_ | _A/Vladimir/137/2015_                   | _Garten_Rebecca_  |
| 4893 | 2015-03-12 | _EPI_ISL_197554_ | _A/Guatemala/13/2015_                   | _Garten_Rebecca_  |
| 4894 | 2015-03-12 | _EPI_ISL_197560_ | _A/Guatemala/13/2015_                   | _Garten_Rebecca_  |
| 4895 | 2015-03-13 | _EPI_ISL_178965_ | _A/Idaho/12/2015_                       | _Garten_Rebecca_  |
| 4896 | 2015-03-13 | _EPI_ISL_178996_ | _A/Vermont/05/2015_                     | _Garten_Rebecca_  |
| 4897 | 2015-03-13 | _EPI_ISL_200672_ | _A/Brazil/9850/2015_                    | _Garten_Rebecca_  |
| 4898 | 2015-03-13 | _EPI_ISL_205160_ | _A/South_Australia/21/2015_             | _Garten_Rebecca_  |
| 4899 | 2015-03-14 | _EPI_ISL_191683_ | _A/South_Dakota/35/2015_                | _Garten_Rebecca_  |
| 4900 | 2015-03-14 | _EPI_ISL_191685_ | _A/Idaho/17/2015_                       | _Garten_Rebecca_  |
| 4901 | 2015-03-14 | _EPI_ISL_192188_ | _A/Idaho/17/2015_                       | _Garten_Rebecca_  |
| 4902 | 2015-03-14 | _EPI_ISL_194949_ | _A/Dominica/642/2015_                   | _Garten_Rebecca_  |
| 4903 | 2015-03-14 | _EPI_ISL_197551_ | _A/Moscow/102/2015_                     | _Garten_Rebecca_  |
| 4904 | 2015-03-15 | _EPI_ISL_179003_ | _A/North_Carolina/16/2015_              | _Garten_Rebecca_  |
| 4905 | 2015-03-15 | _EPI_ISL_191029_ | _A/Washington/31/2015_                  | _Garten_Rebecca_  |
| 4906 | 2015-03-15 | _EPI_ISL_193340_ | _A/Brazil/9492/2015_                    | _Garten_Rebecca_  |
| 4907 | 2015-03-16 | _EPI_ISL_192177_ | _A/Washington/34/2015_                  | _Garten_Rebecca_  |
| 4908 | 2015-03-16 | _EPI_ISL_200677_ | _A/Brazil/4996/2015_                    | _Garten_Rebecca_  |
| 4909 | 2015-03-16 | _EPI_ISL_200714_ | _A/Dominica/645/2015_                   | _Garten_Rebecca_  |
| 4910 | 2015-03-17 | _EPI_ISL_179004_ | _A/North_Carolina/15/2015_              | _Garten_Rebecca_  |
| 4911 | 2015-03-17 | _EPI_ISL_179009_ | _A/Florida/26/2015_                     | _Garten_Rebecca_  |
| 4912 | 2015-03-17 | _EPI_ISL_200676_ | _A/Brazil/8925/2015_                    | _Garten_Rebecca_  |
| 4913 | 2015-03-18 | _EPI_ISL_191686_ | _A/New_Mexico/18/2015_                  | _Garten_Rebecca_  |
| 4914 | 2015-03-18 | _EPI_ISL_192176_ | _A/Washington/35/2015_                  | _Garten_Rebecca_  |
| 4915 | 2015-03-18 | _EPI_ISL_194172_ | _A/Brisbane/47/2015_                    | _Garten_Rebecca_  |
| 4916 | 2015-03-18 | _EPI_ISL_197532_ | _A/Mexico/1402/2015_                    | _Garten_Rebecca_  |
| 4917 | 2015-03-18 | _EPI_ISL_197552_ | _A/N.Novgorod/143/2015_                 | _Garten_Rebecca_  |
| 4918 | 2015-03-18 | _EPI_ISL_197558_ | _A/Guatemala/3315/2015_                 | _Garten_Rebecca_  |
| 4919 | 2015-03-18 | _EPI_ISL_200700_ | _A/Para/134244-IEC/2015_                | _Garten_Rebecca_  |
| 4920 | 2015-03-19 | _EPI_ISL_195853_ | _A/Serbia/NS1241/2015_                  | _Garten_Rebecca_  |
| 4921 | 2015-03-19 | _EPI_ISL_201926_ | _A/KOBE/262/2015_                       | _Takashita_Emi_   |
| 4922 | 2015-03-19 | _EPI_ISL_202080_ | _A/Guatemala/8147/2015_                 | _Garten_Rebecca_  |
| 4923 | 2015-03-20 | _EPI_ISL_179007_ | _A/Ohio/11/2015_                        | _Garten_Rebecca_  |
| 4924 | 2015-03-20 | _EPI_ISL_200673_ | _A/Brazil/1804/2015_                    | _Garten_Rebecca_  |
| 4925 | 2015-03-21 | _EPI_ISL_178999_ | _A/New_Jersey/13/2015_                  | _Garten_Rebecca_  |
| 4926 | 2015-03-21 | _EPI_ISL_179006_ | _A/Ohio/10/2015_                        | _Garten_Rebecca_  |
| 4927 | 2015-03-21 | _EPI_ISL_193347_ | _A/Brazil/9517/2015_                    | _Garten_Rebecca_  |
| 4928 | 2015-03-22 | _EPI_ISL_179010_ | _A/Kentucky/06/2015_                    | _Garten_Rebecca_  |
| 4929 | 2015-03-22 | _EPI_ISL_195887_ | _A/Jordan/10702/2015_                   | _Garten_Rebecca_  |
| 4930 | 2015-03-23 | _EPI_ISL_193356_ | _A/Nebraska/16/2015_                    | _Garten_Rebecca_  |
| 4931 | 2015-03-23 | _EPI_ISL_194947_ | _A/Dominica/672/2015_                   | _Garten_Rebecca_  |
| 4932 | 2015-03-23 | _EPI_ISL_200701_ | _A/Para/134324-IEC/2015_                | _Garten_Rebecca_  |
| 4933 | 2015-03-23 | _EPI_ISL_201242_ | _A/Guatemala/8802/2015_                 | _Garten_Rebecca_  |
| 4934 | 2015-03-24 | _EPI_ISL_197526_ | _A/Mexico/1384/2015_                    | _Garten_Rebecca_  |
| 4935 | 2015-03-27 | _EPI_ISL_193345_ | _A/Idaho/18/2015_                       | _Garten_Rebecca_  |
| 4936 | 2015-03-27 | _EPI_ISL_195885_ | _A/Brazil/56/2015_                      | _Garten_Rebecca_  |
| 4937 | 2015-03-28 | _EPI_ISL_188894_ | _A/Texas/43/2015_                       | _Garten_Rebecca_  |
| 4938 | 2015-03-28 | _EPI_ISL_192185_ | _A/Hawaii/27/2015_                      | _Garten_Rebecca_  |
| 4939 | 2015-03-29 | _EPI_ISL_193349_ | _A/Massachusetts/18/2015_               | _Garten_Rebecca_  |
| 4940 | 2015-03-30 | _EPI_ISL_178997_ | _A/Rhode_Island/12/2015_                | _Garten_Rebecca_  |
| 4941 | 2015-03-31 | _EPI_ISL_191711_ | _A/South_Dakota/11/2015_                | _Garten_Rebecca_  |
| 4942 | 2015-03-31 | _EPI_ISL_193354_ | _A/Florida/43/2015_                     | _Garten_Rebecca_  |
| 4943 | 2015-03-31 | _EPI_ISL_194165_ | _A/Victoria/503/2015_                   | _Garten_Rebecca_  |
| 4944 | 2015-03-31 | _EPI_ISL_200702_ | _A/Para/134473-IEC/2015_                | _Garten_Rebecca_  |
| 4945 | 2015-03-31 | _EPI_ISL_200704_ | _A/Rio_Grande_Do_Norte/134592-IEC/2015_ | _Garten_Rebecca_  |
| 4946 | 2015-04-01 | _EPI_ISL_188861_ | _A/England/51440624/2015_               | _Galliano_Monica_ |
| 4947 | 2015-04-01 | _EPI_ISL_188862_ | _A/England/51440626/2015_               | _Galliano_Monica_ |
| 4948 | 2015-04-01 | _EPI_ISL_188863_ | _A/England/51440629/2015_               | _Galliano_Monica_ |
| 4949 | 2015-04-01 | _EPI_ISL_191701_ | _A/Minnesota/25/2015_                   | _Garten_Rebecca_  |
| 4950 | 2015-04-01 | _EPI_ISL_191702_ | _A/New_Mexico/19/2015_                  | _Garten_Rebecca_  |
| 4951 | 2015-04-01 | _EPI_ISL_197534_ | _A/Mexico/1401/2015_                    | _Garten_Rebecca_  |
| 4952 | 2015-04-02 | _EPI_ISL_193307_ | _A/Minnesota/26/2015_                   | _Garten_Rebecca_  |
| 4953 | 2015-04-03 | _EPI_ISL_177688_ | _A/Karlstad/3/2015_                     | _Brytting_Maria_  |
| 4954 | 2015-04-03 | _EPI_ISL_191668_ | _A/Rhode_Island/24/2015_                | _Garten_Rebecca_  |
| 4955 | 2015-04-04 | _EPI_ISL_191670_ | _A/Wisconsin/36/2015_                   | _Garten_Rebecca_  |
| 4956 | 2015-04-04 | _EPI_ISL_193329_ | _A/Hawaii/28/2015_                      | _Garten_Rebecca_  |
| 4957 | 2015-04-04 | _EPI_ISL_193360_ | _A/South_Dakota/12/2015_                | _Garten_Rebecca_  |

|                  |                  |                                         |                  |
|------------------|------------------|-----------------------------------------|------------------|
| 4958 2015-04-04_ | _EPI_ISL_200706_ | _A/Para/134701-IEC/2015_                | _Garten_Rebecca_ |
| 4959 2015-04-06_ | _EPI_ISL_191695_ | _A/Nevada/36/2015_                      | _Garten_Rebecca_ |
| 4960 2015-04-06_ | _EPI_ISL_195855_ | _A/Moscow/134/2015_                     | _Garten_Rebecca_ |
| 4961 2015-04-06_ | _EPI_ISL_200703_ | _A/Para/134575-IEC/2015_                | _Garten_Rebecca_ |
| 4962 2015-04-07_ | _EPI_ISL_191964_ | _A/Ternopil/407/2015_                   | _Garten_Rebecca_ |
| 4963 2015-04-08_ | _EPI_ISL_177693_ | _A/Sweden/20/2015_                      | _Brytting_Maria_ |
| 4964 2015-04-08_ | _EPI_ISL_191689_ | _A/Indiana/14/2015_                     | _Garten_Rebecca_ |
| 4965 2015-04-08_ | _EPI_ISL_200705_ | _A/Rio_Grande_Do_Norte/134696-IEC/2015_ | _Garten_Rebecca_ |
| 4966 2015-04-09_ | _EPI_ISL_192703_ | _A/Peru/28/2015_                        | _Garten_Rebecca_ |
| 4967 2015-04-09_ | _EPI_ISL_197556_ | _A/Brazil/114/2015_                     | _Garten_Rebecca_ |
| 4968 2015-04-12_ | _EPI_ISL_191700_ | _A/Alaska/10/2015_                      | _Garten_Rebecca_ |
| 4969 2015-04-12_ | _EPI_ISL_191713_ | _A/Minnesota/27/2015_                   | _Garten_Rebecca_ |
| 4970 2015-04-13_ | _EPI_ISL_191699_ | _A/Massachusetts/19/2015_               | _Garten_Rebecca_ |
| 4971 2015-04-13_ | _EPI_ISL_192696_ | _A/Peru/27/2015_                        | _Garten_Rebecca_ |
| 4972 2015-04-14_ | _EPI_ISL_191669_ | _A/New_Jersey/49/2015_                  | _Garten_Rebecca_ |
| 4973 2015-04-14_ | _EPI_ISL_191692_ | _A/Idaho/23/2015_                       | _Garten_Rebecca_ |
| 4974 2015-04-14_ | _EPI_ISL_191696_ | _A/Arizona/07/2015_                     | _Garten_Rebecca_ |
| 4975 2015-04-14_ | _EPI_ISL_191697_ | _A/Hawaii/37/2015_                      | _Garten_Rebecca_ |
| 4976 2015-04-14_ | _EPI_ISL_191966_ | _A/Khmelnitsky/459/2015_                | _Garten_Rebecca_ |
| 4977 2015-04-14_ | _EPI_ISL_191968_ | _A/Khmelnitsky/464/2015_                | _Garten_Rebecca_ |
| 4978 2015-04-14_ | _EPI_ISL_193319_ | _A/New_Jersey/48/2015_                  | _Garten_Rebecca_ |
| 4979 2015-04-15_ | _EPI_ISL_191965_ | _A/Dnipropetrovsk/442/2015_             | _Garten_Rebecca_ |
| 4980 2015-04-16_ | _EPI_ISL_200671_ | _A/Brazil/8433/2015_                    | _Garten_Rebecca_ |
| 4981 2015-04-16_ | _EPI_ISL_201222_ | _A/Acre/134806-IEC/2015_                | _Garten_Rebecca_ |
| 4982 2015-04-16_ | _EPI_ISL_202086_ | _A/Guatemala/363/2015_                  | _Garten_Rebecca_ |
| 4983 2015-04-18_ | _EPI_ISL_191690_ | _A/Alaska/09/2015_                      | _Garten_Rebecca_ |
| 4984 2015-04-18_ | _EPI_ISL_191703_ | _A/Florida/45/2015_                     | _Garten_Rebecca_ |
| 4985 2015-04-18_ | _EPI_ISL_193310_ | _A/Florida/46/2015_                     | _Garten_Rebecca_ |
| 4986 2015-04-19_ | _EPI_ISL_191706_ | _A/Hawaii/33/2015_                      | _Garten_Rebecca_ |
| 4987 2015-04-20_ | _EPI_ISL_200693_ | _A/Laos/372/2015_                       | _Garten_Rebecca_ |
| 4988 2015-04-21_ | _EPI_ISL_191709_ | _A/Wisconsin/66/2015_                   | _Garten_Rebecca_ |
| 4989 2015-04-21_ | _EPI_ISL_191710_ | _A/Minnesota/28/2015_                   | _Garten_Rebecca_ |
| 4990 2015-04-21_ | _EPI_ISL_197279_ | _A/Wisconsin/66/2015_                   | _Garten_Rebecca_ |
| 4991 2015-04-21_ | _EPI_ISL_201243_ | _A/Guatemala/9151/2015_                 | _Garten_Rebecca_ |
| 4992 2015-04-23_ | _EPI_ISL_192697_ | _A/Peru/30/2015_                        | _Garten_Rebecca_ |
| 4993 2015-04-24_ | _EPI_ISL_193334_ | _A/Peru/34/2015_                        | _Garten_Rebecca_ |
| 4994 2015-04-24_ | _EPI_ISL_201249_ | _A/Brazil/2047/2015_                    | _Garten_Rebecca_ |
| 4995 2015-04-25_ | _EPI_ISL_195876_ | _A/Ecuador/2369/2015_                   | _Garten_Rebecca_ |
| 4996 2015-04-26_ | _EPI_ISL_191678_ | _A/Florida/49/2015_                     | _Garten_Rebecca_ |
| 4997 2015-04-28_ | _EPI_ISL_191698_ | _A/California/82/2015_                  | _Garten_Rebecca_ |
| 4998 2015-04-29_ | _EPI_ISL_200696_ | _A/Laos/179/2015_                       | _Garten_Rebecca_ |
| 4999 2015-04-29_ | _EPI_ISL_201223_ | _A/Acre/135094-IEC/2015_                | _Garten_Rebecca_ |
| 5000 2015-05-02_ | _EPI_ISL_197256_ | _A/Brazil/2837/2015_                    | _Garten_Rebecca_ |
| 5001 2015-05-03_ | _EPI_ISL_197492_ | _A/Guatemala/15/2015_                   | _Garten_Rebecca_ |
| 5002 2015-05-03_ | _EPI_ISL_197555_ | _A/Guatemala/15/2015_                   | _Garten_Rebecca_ |
| 5003 2015-05-04_ | _EPI_ISL_193330_ | _A/Brazil/187/2015_                     | _Garten_Rebecca_ |
| 5004 2015-05-04_ | _EPI_ISL_193335_ | _A/Peru/36/2015_                        | _Garten_Rebecca_ |
| 5005 2015-05-05_ | _EPI_ISL_197278_ | _A/Guatemala/18/2015_                   | _Garten_Rebecca_ |
| 5006 2015-05-05_ | _EPI_ISL_197484_ | _A/Guatemala/21/2015_                   | _Garten_Rebecca_ |
| 5007 2015-05-05_ | _EPI_ISL_197488_ | _A/Guatemala/19/2015_                   | _Garten_Rebecca_ |
| 5008 2015-05-05_ | _EPI_ISL_201245_ | _A/Brazil/4388/2015_                    | _Garten_Rebecca_ |
| 5009 2015-05-05_ | _EPI_ISL_202397_ | _A/Brazil/4390/2015_                    | _Garten_Rebecca_ |
| 5010 2015-05-06_ | _EPI_ISL_191684_ | _A/Washington/37/2015_                  | _Garten_Rebecca_ |
| 5011 2015-05-06_ | _EPI_ISL_197549_ | _A/Mexico/1546/2015_                    | _Garten_Rebecca_ |
| 5012 2015-05-06_ | _EPI_ISL_202844_ | _A/Liaoning-Baita/1293/2015_            | _Garten_Rebecca_ |
| 5013 2015-05-08_ | _EPI_ISL_200684_ | _A/Ecuador/1845/2015_                   | _Garten_Rebecca_ |
| 5014 2015-05-10_ | _EPI_ISL_193336_ | _A/Peru/37/2015_                        | _Garten_Rebecca_ |
| 5015 2015-05-10_ | _EPI_ISL_193355_ | _A/Washington/36/2015_                  | _Garten_Rebecca_ |
| 5016 2015-05-11_ | _EPI_ISL_201250_ | _A/Brazil/7588/2015_                    | _Garten_Rebecca_ |
| 5017 2015-05-13_ | _EPI_ISL_201224_ | _A/Rio_Grande_Do_Norte/135219-IEC/2015_ | _Garten_Rebecca_ |
| 5018 2015-05-14_ | _EPI_ISL_194174_ | _A/Brazil/237/2015_                     | _Garten_Rebecca_ |
| 5019 2015-05-14_ | _EPI_ISL_200681_ | _A/Ecuador/572/2015_                    | _Garten_Rebecca_ |
| 5020 2015-05-15_ | _EPI_ISL_193314_ | _A/Brazil/9056/2015_                    | _Garten_Rebecca_ |
| 5021 2015-05-16_ | _EPI_ISL_191715_ | _A/Minnesota/29/2015_                   | _Garten_Rebecca_ |
| 5022 2015-05-16_ | _EPI_ISL_197500_ | _A/Nakhonratchaisma/35/2015_            | _Garten_Rebecca_ |
| 5023 2015-05-16_ | _EPI_ISL_200720_ | _A/Victoria/511/2015_                   | _Garten_Rebecca_ |
| 5024 2015-05-16_ | _EPI_ISL_205158_ | _A/Victoria/511/2015_                   | _Garten_Rebecca_ |
| 5025 2015-05-16_ | _EPI_ISL_205159_ | _A/Victoria/511/2015_                   | _Garten_Rebecca_ |
| 5026 2015-05-18_ | _EPI_ISL_191705_ | _A/Minnesota/30/2015_                   | _Garten_Rebecca_ |
| 5027 2015-05-18_ | _EPI_ISL_193313_ | _A/Santiago/33417/2015_                 | _Garten_Rebecca_ |
| 5028 2015-05-18_ | _EPI_ISL_197493_ | _A/Guatemala/5015/2015_                 | _Garten_Rebecca_ |
| 5029 2015-05-18_ | _EPI_ISL_197557_ | _A/Guatemala/5015/2015_                 | _Garten_Rebecca_ |
| 5030 2015-05-18_ | _EPI_ISL_201225_ | _A/Acre/135356-IEC/2015_                | _Garten_Rebecca_ |
| 5031 2015-05-19_ | _EPI_ISL_197529_ | _A/Chanthaburi/49/2015_                 | _Garten_Rebecca_ |
| 5032 2015-05-21_ | _EPI_ISL_197253_ | _A/Hawaii/34/2015_                      | _Garten_Rebecca_ |
| 5033 2015-05-21_ | _EPI_ISL_200664_ | _A/Hawaii/34/2015_                      | _Garten_Rebecca_ |
| 5034 2015-05-21_ | _EPI_ISL_200680_ | _A/Ecuador/2404/2015_                   | _Garten_Rebecca_ |
| 5035 2015-05-21_ | _EPI_ISL_201246_ | _A/Brazil/0168/2015_                    | _Garten_Rebecca_ |
| 5036 2015-05-22_ | _EPI_ISL_197275_ | _A/Paraguay/3371/2015_                  | _Garten_Rebecca_ |
| 5037 2015-05-22_ | _EPI_ISL_202400_ | _A/Brazil/2002/2015_                    | _Garten_Rebecca_ |
| 5038 2015-05-25_ | _EPI_ISL_195856_ | _A/Guatemala/9704/2015_                 | _Garten_Rebecca_ |
| 5039 2015-05-25_ | _EPI_ISL_195894_ | _A/Bangladesh/3400/2015_                | _Garten_Rebecca_ |
| 5040 2015-05-25_ | _EPI_ISL_200694_ | _A/Laos/529/2015_                       | _Garten_Rebecca_ |
| 5041 2015-05-25_ | _EPI_ISL_200695_ | _A/Laos/535/2015_                       | _Garten_Rebecca_ |
| 5042 2015-05-26_ | _EPI_ISL_197251_ | _A/Hawaii/35/2015_                      | _Garten_Rebecca_ |
| 5043 2015-05-26_ | _EPI_ISL_197273_ | _A/Paraguay/3585/2015_                  | _Garten_Rebecca_ |
| 5044 2015-05-27_ | _EPI_ISL_197501_ | _A/New_Zealand/431/2015_                | _Garten_Rebecca_ |
| 5045 2015-05-27_ | _EPI_ISL_201247_ | _A/Brazil/1790/2015_                    | _Garten_Rebecca_ |
| 5046 2015-05-28_ | _EPI_ISL_194959_ | _A/Mexico/1670/2015_                    | _Garten_Rebecca_ |
| 5047 2015-05-28_ | _EPI_ISL_194971_ | _A/Santiago/37245/2015_                 | _Garten_Rebecca_ |
| 5048 2015-05-28_ | _EPI_ISL_194975_ | _A/Santiago/35385/2015_                 | _Garten_Rebecca_ |
| 5049 2015-05-28_ | _EPI_ISL_203424_ | _A/Pernambuco/135596-IEC/2015_          | _Garten_Rebecca_ |
| 5050 2015-05-29_ | _EPI_ISL_201226_ | _A/Rio_Grande_Do_Norte/135497-IEC/2015_ | _Garten_Rebecca_ |
| 5051 2015-05-29_ | _EPI_ISL_201248_ | _A/Brazil/2081/2015_                    | _Garten_Rebecca_ |
| 5052 2015-06-01_ | _EPI_ISL_192711_ | _A/Alaska/18/2015_                      | _Garten_Rebecca_ |
| 5053 2015-06-01_ | _EPI_ISL_193327_ | _A/Alaska/17/2015_                      | _Garten_Rebecca_ |
| 5054 2015-06-01_ | _EPI_ISL_203425_ | _A/Pernambuco/135597-IEC/2015_          | _Garten_Rebecca_ |
| 5055 2015-06-02_ | _EPI_ISL_197507_ | _A/Chanthaburi/40/2015_                 | _Garten_Rebecca_ |
| 5056 2015-06-03_ | _EPI_ISL_191707_ | _A/Florida/50/2015_                     | _Garten_Rebecca_ |
| 5057 2015-06-04_ | _EPI_ISL_197277_ | _A/Paraguay/5554/2015_                  | _Garten_Rebecca_ |
| 5058 2015-06-04_ | _EPI_ISL_197525_ | _A/New_Zealand/686/2015_                | _Garten_Rebecca_ |
| 5059 2015-06-04_ | _EPI_ISL_199516_ | _A/Colombia/5215/2015_                  | _Garten_Rebecca_ |
| 5060 2015-06-05_ | _EPI_ISL_192712_ | _A/Alaska/13/2015_                      | _Garten_Rebecca_ |
| 5061 2015-06-05_ | _EPI_ISL_194960_ | _A/Ecuador/2384/2015_                   | _Garten_Rebecca_ |
| 5062 2015-06-05_ | _EPI_ISL_195906_ | _A/Guatemala/9922/2015_                 | _Garten_Rebecca_ |
| 5063 2015-06-05_ | _EPI_ISL_197515_ | _A/Bangkok/43/2015_                     | _Garten_Rebecca_ |
| 5064 2015-06-06_ | _EPI_ISL_194962_ | _A/Ecuador/1668/2015_                   | _Garten_Rebecca_ |
| 5065 2015-06-06_ | _EPI_ISL_197511_ | _A/New_Zealand/683/2015_                | _Garten_Rebecca_ |
| 5066 2015-06-07_ | _EPI_ISL_199513_ | _A/Colombia/241/2015_                   | _Garten_Rebecca_ |
| 5067 2015-06-08_ | _EPI_ISL_192713_ | _A/Alaska/21/2015_                      | _Garten_Rebecca_ |
| 5068 2015-06-08_ | _EPI_ISL_193348_ | _A/Hawaii/45/2015_                      | _Garten_Rebecca_ |
| 5069 2015-06-08_ | _EPI_ISL_201235_ | _A/French_Guiana/8217/2015_             | _Garten_Rebecca_ |
| 5070 2015-06-09_ | _EPI_ISL_192692_ | _A/Florida/51/2015_                     | _Garten_Rebecca_ |
| 5071 2015-06-09_ | _EPI_ISL_193318_ | _A/Santiago/39170/2015_                 | _Garten_Rebecca_ |
| 5072 2015-06-11_ | _EPI_ISL_197252_ | _A/Hawaii/36/2015_                      | _Garten_Rebecca_ |
| 5073 2015-06-11_ | _EPI_ISL_197494_ | _A/Guatemala/5915/2015_                 | _Garten_Rebecca_ |
| 5074 2015-06-12_ | _EPI_ISL_194978_ | _A/Michigan/38/2015_                    | _Garten_Rebecca_ |
| 5075 2015-06-12_ | _EPI_ISL_195645_ | _A/Michigan/39/2015_                    | _Jang_Yunho_     |
| 5076 2015-06-12_ | _EPI_ISL_195897_ | _A/Guatemala/27/2015_                   | _Garten_Rebecca_ |
| 5077 2015-06-12_ | _EPI_ISL_197267_ | _A/New_Zealand/282/2015_                | _Garten_Rebecca_ |
| 5078 2015-06-12_ | _EPI_ISL_197506_ | _A/Chanthaburi/46/2015_                 | _Garten_Rebecca_ |

|      |            |                  |                                |                  |
|------|------------|------------------|--------------------------------|------------------|
| 5079 | 2015-06-14 | _EPI_ISL_193326_ | _A/Alaska/26/2015_             | _Garten_Rebecca_ |
| 5080 | 2015-06-14 | _EPI_ISL_197766_ | _A/Alaska/27/2015_             | _Garten_Rebecca_ |
| 5081 | 2015-06-15 | _EPI_ISL_194972_ | _A/Santiago/40992/2015_        | _Garten_Rebecca_ |
| 5082 | 2015-06-15 | _EPI_ISL_197255_ | _A/New_Zealand/324/2015_       | _Garten_Rebecca_ |
| 5083 | 2015-06-15 | _EPI_ISL_197487_ | _A/New_Zealand/588/2015_       | _Garten_Rebecca_ |
| 5084 | 2015-06-15 | _EPI_ISL_197531_ | _A/New_Zealand/588/2015_       | _Garten_Rebecca_ |
| 5085 | 2015-06-15 | _EPI_ISL_201241_ | _A/Guatemala/5848/2015_        | _Garten_Rebecca_ |
| 5086 | 2015-06-15 | _EPI_ISL_202394_ | _A/Alaska/51/2015_             | _Garten_Rebecca_ |
| 5087 | 2015-06-15 | _EPI_ISL_202399_ | _A/Alaska/60/2015_             | _Garten_Rebecca_ |
| 5088 | 2015-06-15 | _EPI_ISL_202846_ | _A/Hunan-Wuling/11088/2015_    | _Garten_Rebecca_ |
| 5089 | 2015-06-15 | _EPI_ISL_205153_ | _A/Alaska/49/2015_             | _Garten_Rebecca_ |
| 5090 | 2015-06-15 | _EPI_ISL_205154_ | _A/Alaska/49/2015_             | _Garten_Rebecca_ |
| 5091 | 2015-06-15 | _EPI_ISL_205190_ | _A/Argentina/23/2015_          | _Garten_Rebecca_ |
| 5092 | 2015-06-15 | _EPI_ISL_205191_ | _A/Argentina/23/2015_          | _Garten_Rebecca_ |
| 5093 | 2015-06-15 | _EPI_ISL_205192_ | _A/Argentina/24/2015_          | _Garten_Rebecca_ |
| 5094 | 2015-06-15 | _EPI_ISL_205193_ | _A/Argentina/24/2015_          | _Garten_Rebecca_ |
| 5095 | 2015-06-15 | _EPI_ISL_205194_ | _A/Argentina/25/2015_          | _Garten_Rebecca_ |
| 5096 | 2015-06-15 | _EPI_ISL_205195_ | _A/Argentina/25/2015_          | _Garten_Rebecca_ |
| 5097 | 2015-06-16 | _EPI_ISL_194982_ | _A/Alaska/36/2015_             | _Garten_Rebecca_ |
| 5098 | 2015-06-16 | _EPI_ISL_197258_ | _A/New_Zealand/322/2015_       | _Garten_Rebecca_ |
| 5099 | 2015-06-16 | _EPI_ISL_197264_ | _A/New_Zealand/323/2015_       | _Garten_Rebecca_ |
| 5100 | 2015-06-16 | _EPI_ISL_199519_ | _A/Uruguay/39/2015_            | _Garten_Rebecca_ |
| 5101 | 2015-06-16 | _EPI_ISL_202841_ | _A/Washington/45/2015_         | _Garten_Rebecca_ |
| 5102 | 2015-06-16 | _EPI_ISL_205155_ | _A/Alaska/50/2015_             | _Garten_Rebecca_ |
| 5103 | 2015-06-16 | _EPI_ISL_205156_ | _A/Alaska/50/2015_             | _Garten_Rebecca_ |
| 5104 | 2015-06-16 | _EPI_ISL_205631_ | _A/Washington/45/2015_         | _Garten_Rebecca_ |
| 5105 | 2015-06-17 | _EPI_ISL_192714_ | _A/Alaska/25/2015_             | _Garten_Rebecca_ |
| 5106 | 2015-06-17 | _EPI_ISL_194944_ | _A/Alaska/35/2015_             | _Garten_Rebecca_ |
| 5107 | 2015-06-17 | _EPI_ISL_197548_ | _A/Virginia/32/2015_           | _Garten_Rebecca_ |
| 5108 | 2015-06-17 | _EPI_ISL_201202_ | _A/Alaska/59/2015_             | _Garten_Rebecca_ |
| 5109 | 2015-06-17 | _EPI_ISL_202396_ | _A/Alaska/58/2015_             | _Garten_Rebecca_ |
| 5110 | 2015-06-18 | _EPI_ISL_194945_ | _A/Alaska/29/2015_             | _Garten_Rebecca_ |
| 5111 | 2015-06-18 | _EPI_ISL_195900_ | _A/Guatemala/142/2015_         | _Garten_Rebecca_ |
| 5112 | 2015-06-18 | _EPI_ISL_201199_ | _A/Alaska/55/2015_             | _Garten_Rebecca_ |
| 5113 | 2015-06-18 | _EPI_ISL_201200_ | _A/Alaska/56/2015_             | _Garten_Rebecca_ |
| 5114 | 2015-06-18 | _EPI_ISL_201201_ | _A/Alaska/57/2015_             | _Garten_Rebecca_ |
| 5115 | 2015-06-18 | _EPI_ISL_201203_ | _A/Alaska/61/2015_             | _Garten_Rebecca_ |
| 5116 | 2015-06-18 | _EPI_ISL_205630_ | _A/Guatemala/142/2015_         | _Garten_Rebecca_ |
| 5117 | 2015-06-19 | _EPI_ISL_194943_ | _A/Alaska/33/2015_             | _Garten_Rebecca_ |
| 5118 | 2015-06-19 | _EPI_ISL_194948_ | _A/Alaska/34/2015_             | _Garten_Rebecca_ |
| 5119 | 2015-06-19 | _EPI_ISL_194984_ | _A/Alaska/30/2015_             | _Garten_Rebecca_ |
| 5120 | 2015-06-19 | _EPI_ISL_198220_ | _A/Alaska/43/2015_             | _Garten_Rebecca_ |
| 5121 | 2015-06-19 | _EPI_ISL_201194_ | _A/Alaska/40/2015_             | _Garten_Rebecca_ |
| 5122 | 2015-06-20 | _EPI_ISL_194985_ | _A/Alaska/31/2015_             | _Garten_Rebecca_ |
| 5123 | 2015-06-21 | _EPI_ISL_192693_ | _A/Arizona/09/2015_            | _Garten_Rebecca_ |
| 5124 | 2015-06-21 | _EPI_ISL_194946_ | _A/Alaska/38/2015_             | _Garten_Rebecca_ |
| 5125 | 2015-06-21 | _EPI_ISL_194981_ | _A/Alaska/37/2015_             | _Garten_Rebecca_ |
| 5126 | 2015-06-21 | _EPI_ISL_197265_ | _A/New_Zealand/385/2015_       | _Garten_Rebecca_ |
| 5127 | 2015-06-21 | _EPI_ISL_200668_ | _A/Alaska/46/2015_             | _Garten_Rebecca_ |
| 5128 | 2015-06-21 | _EPI_ISL_200669_ | _A/Alaska/48/2015_             | _Garten_Rebecca_ |
| 5129 | 2015-06-21 | _EPI_ISL_201204_ | _A/Alaska/62/2015_             | _Garten_Rebecca_ |
| 5130 | 2015-06-22 | _EPI_ISL_193321_ | _A/Florida/52/2015_            | _Garten_Rebecca_ |
| 5131 | 2015-06-22 | _EPI_ISL_197262_ | _A/New_Zealand/381/2015_       | _Garten_Rebecca_ |
| 5132 | 2015-06-22 | _EPI_ISL_197268_ | _A/New_Zealand/383/2015_       | _Garten_Rebecca_ |
| 5133 | 2015-06-22 | _EPI_ISL_197269_ | _A/New_Zealand/382/2015_       | _Garten_Rebecca_ |
| 5134 | 2015-06-22 | _EPI_ISL_197763_ | _A/Alaska/72/2015_             | _Garten_Rebecca_ |
| 5135 | 2015-06-22 | _EPI_ISL_203426_ | _A/Pernambuco/136136-IEC/2015_ | _Garten_Rebecca_ |
| 5136 | 2015-06-22 | _EPI_ISL_205150_ | _A/Laos/648/2015_              | _Garten_Rebecca_ |
| 5137 | 2015-06-23 | _EPI_ISL_194979_ | _A/Valparaiso/42142/2015_      | _Garten_Rebecca_ |
| 5138 | 2015-06-23 | _EPI_ISL_197770_ | _A/Alaska/73/2015_             | _Garten_Rebecca_ |
| 5139 | 2015-06-23 | _EPI_ISL_197780_ | _A/Alaska/75/2015_             | _Garten_Rebecca_ |
| 5140 | 2015-06-23 | _EPI_ISL_199526_ | _A/Alaska/75/2015_             | _Garten_Rebecca_ |
| 5141 | 2015-06-23 | _EPI_ISL_201196_ | _A/Alaska/45/2015_             | _Garten_Rebecca_ |
| 5142 | 2015-06-23 | _EPI_ISL_200667_ | _A/Alaska/45/2015_             | _Garten_Rebecca_ |
| 5143 | 2015-06-24 | _EPI_ISL_194955_ | _A/Alaska/66/2015_             | _Garten_Rebecca_ |
| 5144 | 2015-06-24 | _EPI_ISL_194973_ | _A/Santiago/42575/2015_        | _Garten_Rebecca_ |
| 5145 | 2015-06-24 | _EPI_ISL_195845_ | _A/Panama/316597/2015_         | _Garten_Rebecca_ |
| 5146 | 2015-06-24 | _EPI_ISL_197772_ | _A/Alaska/79/2015_             | _Garten_Rebecca_ |
| 5147 | 2015-06-24 | _EPI_ISL_199528_ | _A/Alaska/79/2015_             | _Garten_Rebecca_ |
| 5148 | 2015-06-24 | _EPI_ISL_201205_ | _A/Alaska/63/2015_             | _Garten_Rebecca_ |
| 5149 | 2015-06-24 | _EPI_ISL_201206_ | _A/Alaska/64/2015_             | _Garten_Rebecca_ |
| 5150 | 2015-06-25 | _EPI_ISL_194957_ | _A/Alaska/68/2015_             | _Garten_Rebecca_ |
| 5151 | 2015-06-25 | _EPI_ISL_197776_ | _A/Alaska/77/2015_             | _Garten_Rebecca_ |
| 5152 | 2015-06-25 | _EPI_ISL_199508_ | _A/Colombia/5402/2015_         | _Garten_Rebecca_ |
| 5153 | 2015-06-25 | _EPI_ISL_199525_ | _A/Alaska/77/2015_             | _Garten_Rebecca_ |
| 5154 | 2015-06-25 | _EPI_ISL_201238_ | _A/Guatemala/6315/2015_        | _Garten_Rebecca_ |
| 5155 | 2015-06-26 | _EPI_ISL_194965_ | _A/Alaska/65/2015_             | _Garten_Rebecca_ |
| 5156 | 2015-06-26 | _EPI_ISL_194967_ | _A/Alaska/69/2015_             | _Garten_Rebecca_ |
| 5157 | 2015-06-26 | _EPI_ISL_194974_ | _A/Santiago/44139/2015_        | _Garten_Rebecca_ |
| 5158 | 2015-06-26 | _EPI_ISL_197768_ | _A/Alaska/71/2015_             | _Garten_Rebecca_ |
| 5159 | 2015-06-27 | _EPI_ISL_193338_ | _A/Michigan/37/2015_           | _Garten_Rebecca_ |
| 5160 | 2015-06-27 | _EPI_ISL_201236_ | _A/French_Guiana/9189/2015_    | _Garten_Rebecca_ |
| 5161 | 2015-06-27 | _EPI_ISL_203398_ | _A/Alaska/106/2015_            | _Garten_Rebecca_ |
| 5162 | 2015-06-27 | _EPI_ISL_203415_ | _A/Laos/438/2015_              | _Garten_Rebecca_ |
| 5163 | 2015-06-28 | _EPI_ISL_197778_ | _A/Alaska/78/2015_             | _Garten_Rebecca_ |
| 5164 | 2015-06-28 | _EPI_ISL_201215_ | _A/Alaska/102/2015_            | _Garten_Rebecca_ |
| 5165 | 2015-06-29 | _EPI_ISL_200682_ | _A/Ecuador/1695/2015_          | _Garten_Rebecca_ |
| 5166 | 2015-06-29 | _EPI_ISL_201221_ | _A/Oregon/14/2015_             | _Garten_Rebecca_ |
| 5167 | 2015-06-29 | _EPI_ISL_202289_ | _A/Laos/1660/2015_             | _Takashita_Emi_  |
| 5168 | 2015-06-30 | _EPI_ISL_193323_ | _A/Illinois/12/2015_           | _Garten_Rebecca_ |
| 5169 | 2015-06-30 | _EPI_ISL_193341_ | _A/North_Carolina/26/2015_     | _Garten_Rebecca_ |
| 5170 | 2015-06-30 | _EPI_ISL_197789_ | _A/Alaska/80/2015_             | _Garten_Rebecca_ |
| 5171 | 2015-06-30 | _EPI_ISL_199510_ | _A/Colombia/5438/2015_         | _Garten_Rebecca_ |
| 5172 | 2015-06-30 | _EPI_ISL_199511_ | _A/Colombia/5364/2015_         | _Garten_Rebecca_ |
| 5173 | 2015-06-30 | _EPI_ISL_199527_ | _A/Alaska/80/2015_             | _Garten_Rebecca_ |
| 5174 | 2015-06-30 | _EPI_ISL_200688_ | _A/Oregon/11/2015_             | _Garten_Rebecca_ |
| 5175 | 2015-06-30 | _EPI_ISL_201209_ | _A/Alaska/96/2015_             | _Garten_Rebecca_ |
| 5176 | 2015-06-30 | _EPI_ISL_205196_ | _A/Argentina/103/2015_         | _Garten_Rebecca_ |
| 5177 | 2015-06-30 | _EPI_ISL_205197_ | _A/Argentina/103/2015_         | _Garten_Rebecca_ |
| 5178 | 2015-07-01 | _EPI_ISL_193322_ | _A/Wisconsin/69/2015_          | _Garten_Rebecca_ |
| 5179 | 2015-07-01 | _EPI_ISL_197266_ | _A/New_Zealand/500/2015_       | _Garten_Rebecca_ |
| 5180 | 2015-07-01 | _EPI_ISL_197270_ | _A/New_Zealand/476/2015_       | _Garten_Rebecca_ |
| 5181 | 2015-07-01 | _EPI_ISL_197759_ | _A/Alaska/88/2015_             | _Garten_Rebecca_ |
| 5182 | 2015-07-01 | _EPI_ISL_197779_ | _A/Alaska/93/2015_             | _Garten_Rebecca_ |
| 5183 | 2015-07-01 | _EPI_ISL_197788_ | _A/Alaska/89/2015_             | _Garten_Rebecca_ |
| 5184 | 2015-07-01 | _EPI_ISL_197790_ | _A/Alaska/95/2015_             | _Garten_Rebecca_ |
| 5185 | 2015-07-01 | _EPI_ISL_199529_ | _A/Alaska/93/2015_             | _Garten_Rebecca_ |
| 5186 | 2015-07-01 | _EPI_ISL_200685_ | _A/Alaska/67/2015_             | _Garten_Rebecca_ |
| 5187 | 2015-07-01 | _EPI_ISL_200718_ | _A/Oregon/17/2015_             | _Garten_Rebecca_ |
| 5188 | 2015-07-01 | _EPI_ISL_201239_ | _A/Guatemala/6415/2015_        | _Garten_Rebecca_ |
| 5189 | 2015-07-01 | _EPI_ISL_203451_ | _A/Texas/64/2015_              | _Garten_Rebecca_ |
| 5190 | 2015-07-02 | _EPI_ISL_197254_ | _A/New_Zealand/521/2015_       | _Garten_Rebecca_ |
| 5191 | 2015-07-02 | _EPI_ISL_197498_ | _A/Prachuapkhirkhan/289/2015_  | _Garten_Rebecca_ |
| 5192 | 2015-07-02 | _EPI_ISL_197527_ | _A/New_Zealand/532/2015_       | _Garten_Rebecca_ |
| 5193 | 2015-07-02 | _EPI_ISL_197773_ | _A/Alaska/94/2015_             | _Garten_Rebecca_ |
| 5194 | 2015-07-02 | _EPI_ISL_197777_ | _A/Alaska/92/2015_             | _Garten_Rebecca_ |
| 5195 | 2015-07-02 | _EPI_ISL_197800_ | _A/Alaska/81/2015_             | _Garten_Rebecca_ |
| 5196 | 2015-07-02 | _EPI_ISL_201210_ | _A/Alaska/97/2015_             | _Garten_Rebecca_ |
| 5197 | 2015-07-03 | _EPI_ISL_192264_ | _A/ENG/52840541/2015_          | _Galiano_Monica_ |
| 5198 | 2015-07-03 | _EPI_ISL_197263_ | _A/New_Zealand/519/2015_       | _Garten_Rebecca_ |
| 5199 | 2015-07-03 | _EPI_ISL_197764_ | _A/Alaska/87/2015_             | _Garten_Rebecca_ |

|                  |                  |                             |                  |
|------------------|------------------|-----------------------------|------------------|
| 5200 2015-07-03_ | _EPI_ISL_197775_ | _A/Alaska/91/2015_          | _Garten_Rebecca_ |
| 5201 2015-07-03_ | _EPI_ISL_197781_ | _A/Alaska/90/2015_          | _Garten_Rebecca_ |
| 5202 2015-07-03_ | _EPI_ISL_201211_ | _A/Alaska/98/2015_          | _Garten_Rebecca_ |
| 5203 2015-07-03_ | _EPI_ISL_201212_ | _A/Alaska/99/2015_          | _Garten_Rebecca_ |
| 5204 2015-07-03_ | _EPI_ISL_201213_ | _A/Alaska/100/2015_         | _Garten_Rebecca_ |
| 5205 2015-07-03_ | _EPI_ISL_202828_ | _A/Puerto_Rico/02/2015_     | _Garten_Rebecca_ |
| 5206 2015-07-03_ | _EPI_ISL_203399_ | _A/Alaska/107/2015_         | _Garten_Rebecca_ |
| 5207 2015-07-04_ | _EPI_ISL_193324_ | _A/Florida/55/2015_         | _Garten_Rebecca_ |
| 5208 2015-07-04_ | _EPI_ISL_201214_ | _A/Alaska/101/2015_         | _Garten_Rebecca_ |
| 5209 2015-07-04_ | _EPI_ISL_201216_ | _A/Alaska/103/2015_         | _Garten_Rebecca_ |
| 5210 2015-07-04_ | _EPI_ISL_201217_ | _A/Alaska/112/2015_         | _Garten_Rebecca_ |
| 5211 2015-07-04_ | _EPI_ISL_201220_ | _A/Alaska/115/2015_         | _Garten_Rebecca_ |
| 5212 2015-07-04_ | _EPI_ISL_203396_ | _A/Alaska/104/2015_         | _Garten_Rebecca_ |
| 5213 2015-07-04_ | _EPI_ISL_203397_ | _A/Alaska/105/2015_         | _Garten_Rebecca_ |
| 5214 2015-07-05_ | _EPI_ISL_193320_ | _A/New_Jersey/50/2015_      | _Garten_Rebecca_ |
| 5215 2015-07-05_ | _EPI_ISL_194966_ | _A/Hawaii/47/2015_          | _Garten_Rebecca_ |
| 5216 2015-07-05_ | _EPI_ISL_197530_ | _A/New_Zealand/526/2015_    | _Garten_Rebecca_ |
| 5217 2015-07-06_ | _EPI_ISL_194954_ | _A/Mexico/1797/2015_        | _Garten_Rebecca_ |
| 5218 2015-07-06_ | _EPI_ISL_197508_ | _A/New_Zealand/562/2015_    | _Garten_Rebecca_ |
| 5219 2015-07-06_ | _EPI_ISL_197755_ | _A/Alaska/86/2015_          | _Garten_Rebecca_ |
| 5220 2015-07-06_ | _EPI_ISL_197761_ | _A/Alaska/82/2015_          | _Garten_Rebecca_ |
| 5221 2015-07-06_ | _EPI_ISL_197765_ | _A/Alaska/83/2015_          | _Garten_Rebecca_ |
| 5222 2015-07-06_ | _EPI_ISL_197767_ | _A/Alaska/85/2015_          | _Garten_Rebecca_ |
| 5223 2015-07-06_ | _EPI_ISL_197786_ | _A/Alaska/84/2015_          | _Garten_Rebecca_ |
| 5224 2015-07-06_ | _EPI_ISL_199520_ | _A/Uruguay/43/2015_         | _Garten_Rebecca_ |
| 5225 2015-07-06_ | _EPI_ISL_199530_ | _A/Alaska/83/2015_          | _Garten_Rebecca_ |
| 5226 2015-07-06_ | _EPI_ISL_199531_ | _A/Alaska/86/2015_          | _Garten_Rebecca_ |
| 5227 2015-07-06_ | _EPI_ISL_201219_ | _A/Alaska/114/2015_         | _Garten_Rebecca_ |
| 5228 2015-07-06_ | _EPI_ISL_202100_ | _A/Alaska/116/2015_         | _Garten_Rebecca_ |
| 5229 2015-07-06_ | _EPI_ISL_203400_ | _A/Alaska/108/2015_         | _Garten_Rebecca_ |
| 5230 2015-07-07_ | _EPI_ISL_194968_ | _A/Hawaii/46/2015_          | _Garten_Rebecca_ |
| 5231 2015-07-07_ | _EPI_ISL_195833_ | _A/Alaska/149/2015_         | _Garten_Rebecca_ |
| 5232 2015-07-07_ | _EPI_ISL_197524_ | _A/New_Zealand/536/2015_    | _Garten_Rebecca_ |
| 5233 2015-07-07_ | _EPI_ISL_197771_ | _A/Michigan/40/2015_        | _Garten_Rebecca_ |
| 5234 2015-07-07_ | _EPI_ISL_201227_ | _A/Puerto_Rico/03/2015_     | _Garten_Rebecca_ |
| 5235 2015-07-07_ | _EPI_ISL_202290_ | _A/Laos/1706/2015_          | Takashita_Emi_   |
| 5236 2015-07-07_ | _EPI_ISL_203401_ | _A/Alaska/109/2015_         | _Garten_Rebecca_ |
| 5237 2015-07-08_ | _EPI_ISL_194136_ | _A/Hawaii/43/2015_          | _Garten_Rebecca_ |
| 5238 2015-07-08_ | _EPI_ISL_199506_ | _A/Uruguay/44/2015_         | _Garten_Rebecca_ |
| 5239 2015-07-08_ | _EPI_ISL_205276_ | _A/Bolivia/426/2015_        | _Garten_Rebecca_ |
| 5240 2015-07-08_ | _EPI_ISL_205605_ | _A/Hawaii/43/2015_          | _Garten_Rebecca_ |
| 5241 2015-07-09_ | _EPI_ISL_194142_ | _A/Hawaii/44/2015_          | _Garten_Rebecca_ |
| 5242 2015-07-09_ | _EPI_ISL_203403_ | _A/Alaska/111/2015_         | _Garten_Rebecca_ |
| 5243 2015-07-10_ | _EPI_ISL_194956_ | _A/Mexico/1783/2015_        | _Garten_Rebecca_ |
| 5244 2015-07-10_ | _EPI_ISL_200686_ | _A/New_York/55/2015_        | _Garten_Rebecca_ |
| 5245 2015-07-10_ | _EPI_ISL_201208_ | _A/Colombia/5433/2015_      | _Garten_Rebecca_ |
| 5246 2015-07-10_ | _EPI_ISL_201218_ | _A/Alaska/113/2015_         | _Garten_Rebecca_ |
| 5247 2015-07-10_ | _EPI_ISL_205198_ | _A/Argentina/104/2015_      | _Garten_Rebecca_ |
| 5248 2015-07-10_ | _EPI_ISL_205199_ | _A/Argentina/104/2015_      | _Garten_Rebecca_ |
| 5249 2015-07-12_ | _EPI_ISL_197762_ | _A/Connecticut/01/2015_     | _Garten_Rebecca_ |
| 5250 2015-07-13_ | _EPI_ISL_200697_ | _A/Utah/15/2015_            | _Garten_Rebecca_ |
| 5251 2015-07-13_ | _EPI_ISL_200708_ | _A/Puerto_Rico/04/2015_     | _Garten_Rebecca_ |
| 5252 2015-07-13_ | _EPI_ISL_203430_ | _A/Puerto_Rico/04/2015_     | _Garten_Rebecca_ |
| 5253 2015-07-13_ | _EPI_ISL_205202_ | _A/Argentina/11594/2015_    | _Garten_Rebecca_ |
| 5254 2015-07-13_ | _EPI_ISL_205203_ | _A/Argentina/11594/2015_    | _Garten_Rebecca_ |
| 5255 2015-07-13_ | _EPI_ISL_205204_ | _A/Argentina/11596/2015_    | _Garten_Rebecca_ |
| 5256 2015-07-13_ | _EPI_ISL_205205_ | _A/Argentina/11596/2015_    | _Garten_Rebecca_ |
| 5257 2015-07-13_ | _EPI_ISL_205613_ | _A/Laos/724/2015_           | _Garten_Rebecca_ |
| 5258 2015-07-13_ | _EPI_ISL_205629_ | _A/French_Guiana/5020/2015_ | _Garten_Rebecca_ |
| 5259 2015-07-14_ | _EPI_ISL_194983_ | _A/Washington/39/2015_      | _Garten_Rebecca_ |
| 5260 2015-07-14_ | _EPI_ISL_195904_ | _A/Arizona/11/2015_         | _Garten_Rebecca_ |
| 5261 2015-07-14_ | _EPI_ISL_200709_ | _A/Puerto_Rico/05/2015_     | _Garten_Rebecca_ |
| 5262 2015-07-14_ | _EPI_ISL_200731_ | _A/Argentina/113/2015_      | _Garten_Rebecca_ |
| 5263 2015-07-14_ | _EPI_ISL_202291_ | _A/Laos/1730/2015_          | Takashita_Emi_   |
| 5264 2015-07-15_ | _EPI_ISL_197271_ | _A/Oregon/16/2015_          | _Garten_Rebecca_ |
| 5265 2015-07-15_ | _EPI_ISL_200690_ | _A/Nebraska/17/2015_        | _Garten_Rebecca_ |
| 5266 2015-07-15_ | _EPI_ISL_200733_ | _A/Argentina/116/2015_      | _Garten_Rebecca_ |
| 5267 2015-07-15_ | _EPI_ISL_202387_ | _A/Argentina/116/2015_      | _Garten_Rebecca_ |
| 5268 2015-07-15_ | _EPI_ISL_205151_ | _A/Laos/738/2015_           | _Garten_Rebecca_ |
| 5269 2015-07-16_ | _EPI_ISL_200732_ | _A/Argentina/114/2015_      | _Garten_Rebecca_ |
| 5270 2015-07-16_ | _EPI_ISL_200735_ | _A/Argentina/121/2015_      | _Garten_Rebecca_ |
| 5271 2015-07-17_ | _EPI_ISL_195901_ | _A/Panama/316634/2015_      | _Garten_Rebecca_ |
| 5272 2015-07-17_ | _EPI_ISL_197757_ | _A/Hawaii/48/2015_          | _Garten_Rebecca_ |
| 5273 2015-07-18_ | _EPI_ISL_197272_ | _A/Oregon/18/2015_          | _Garten_Rebecca_ |
| 5274 2015-07-18_ | _EPI_ISL_200730_ | _A/Argentina/112/2015_      | _Garten_Rebecca_ |
| 5275 2015-07-18_ | _EPI_ISL_200734_ | _A/Argentina/120/2015_      | _Garten_Rebecca_ |
| 5276 2015-07-19_ | _EPI_ISL_195832_ | _A/Alaska/150/2015_         | _Garten_Rebecca_ |
| 5277 2015-07-19_ | _EPI_ISL_195879_ | _A/Argentina/135/2015_      | _Garten_Rebecca_ |
| 5278 2015-07-20_ | _EPI_ISL_199521_ | _A/Uruguay/54/2015_         | _Garten_Rebecca_ |
| 5279 2015-07-20_ | _EPI_ISL_200742_ | _A/Argentina/11573/2015_    | _Garten_Rebecca_ |
| 5280 2015-07-20_ | _EPI_ISL_205164_ | _A/Alaska/152/2015_         | _Garten_Rebecca_ |
| 5281 2015-07-20_ | _EPI_ISL_205165_ | _A/Alaska/152/2015_         | _Garten_Rebecca_ |
| 5282 2015-07-21_ | _EPI_ISL_195896_ | _A/Colombia/5614/2015_      | _Garten_Rebecca_ |
| 5283 2015-07-21_ | _EPI_ISL_197259_ | _A/Rayong/335/2015_         | _Garten_Rebecca_ |
| 5284 2015-07-21_ | _EPI_ISL_197502_ | _A/New_York/57/2015_        | _Garten_Rebecca_ |
| 5285 2015-07-21_ | _EPI_ISL_199522_ | _A/Uruguay/55/2015_         | _Garten_Rebecca_ |
| 5286 2015-07-21_ | _EPI_ISL_200710_ | _A/Puerto_Rico/06/2015_     | _Garten_Rebecca_ |
| 5287 2015-07-21_ | _EPI_ISL_200737_ | _A/Argentina/133/2015_      | _Garten_Rebecca_ |
| 5288 2015-07-21_ | _EPI_ISL_203428_ | _A/Peru/69/2015_            | _Garten_Rebecca_ |
| 5289 2015-07-21_ | _EPI_ISL_203432_ | _A/Puerto_Rico/06/2015_     | _Garten_Rebecca_ |
| 5290 2015-07-21_ | _EPI_ISL_205162_ | _A/Alaska/151/2015_         | _Garten_Rebecca_ |
| 5291 2015-07-21_ | _EPI_ISL_205163_ | _A/Alaska/151/2015_         | _Garten_Rebecca_ |
| 5292 2015-07-22_ | _EPI_ISL_195886_ | _A/Iowa/19/2015_            | _Garten_Rebecca_ |
| 5293 2015-07-22_ | _EPI_ISL_197260_ | _A/Nonthaburi/340/2015_     | _Garten_Rebecca_ |
| 5294 2015-07-22_ | _EPI_ISL_200736_ | _A/Argentina/132/2015_      | _Garten_Rebecca_ |
| 5295 2015-07-22_ | _EPI_ISL_202292_ | _A/Laos/1751/2015_          | Takashita_Emi_   |
| 5296 2015-07-22_ | _EPI_ISL_205200_ | _A/Argentina/11592/2015_    | _Garten_Rebecca_ |
| 5297 2015-07-22_ | _EPI_ISL_205201_ | _A/Argentina/11592/2015_    | _Garten_Rebecca_ |
| 5298 2015-07-23_ | _EPI_ISL_194164_ | _A/Ohio/20/2015_            | _Garten_Rebecca_ |
| 5299 2015-07-23_ | _EPI_ISL_195835_ | _A/Alaska/146/2015_         | _Garten_Rebecca_ |
| 5300 2015-07-23_ | _EPI_ISL_195899_ | _A/Colombia/5615/2015_      | _Garten_Rebecca_ |
| 5301 2015-07-23_ | _EPI_ISL_197758_ | _A/Hawaii/49/2015_          | _Garten_Rebecca_ |
| 5302 2015-07-23_ | _EPI_ISL_200687_ | _A/Ohio/18/2015_            | _Garten_Rebecca_ |
| 5303 2015-07-23_ | _EPI_ISL_202434_ | _A/Argentina/149/2015_      | _Garten_Rebecca_ |
| 5304 2015-07-24_ | _EPI_ISL_195848_ | _A/Alaska/147/2015_         | _Garten_Rebecca_ |
| 5305 2015-07-24_ | _EPI_ISL_195907_ | _A/Alaska/145/2015_         | _Garten_Rebecca_ |
| 5306 2015-07-24_ | _EPI_ISL_202829_ | _A/Argentina/163/2015_      | _Garten_Rebecca_ |
| 5307 2015-07-24_ | _EPI_ISL_202831_ | _A/Argentina/169/2015_      | _Garten_Rebecca_ |
| 5308 2015-07-24_ | _EPI_ISL_205168_ | _A/Alaska/154/2015_         | _Garten_Rebecca_ |
| 5309 2015-07-24_ | _EPI_ISL_205169_ | _A/Alaska/154/2015_         | _Garten_Rebecca_ |
| 5310 2015-07-25_ | _EPI_ISL_194950_ | _A/Iowa/20/2015_            | _Garten_Rebecca_ |
| 5311 2015-07-25_ | _EPI_ISL_194976_ | _A/Florida/58/2015_         | _Garten_Rebecca_ |
| 5312 2015-07-25_ | _EPI_ISL_195878_ | _A/Argentina/166/2015_      | _Garten_Rebecca_ |
| 5313 2015-07-25_ | _EPI_ISL_202435_ | _A/Argentina/156/2015_      | _Garten_Rebecca_ |
| 5314 2015-07-26_ | _EPI_ISL_194970_ | _A/Florida/57/2015_         | _Garten_Rebecca_ |
| 5315 2015-07-26_ | _EPI_ISL_195831_ | _A/Alaska/148/2015_         | _Garten_Rebecca_ |
| 5316 2015-07-27_ | _EPI_ISL_195863_ | _A/Argentina/254/2015_      | _Garten_Rebecca_ |
| 5317 2015-07-27_ | _EPI_ISL_195866_ | _A/Argentina/183/2015_      | _Garten_Rebecca_ |
| 5318 2015-07-27_ | _EPI_ISL_195873_ | _A/Argentina/196/2015_      | _Garten_Rebecca_ |
| 5319 2015-07-27_ | _EPI_ISL_195875_ | _A/Argentina/218/2015_      | _Garten_Rebecca_ |
| 5320 2015-07-27_ | _EPI_ISL_197257_ | _A/Nonthaburi/333/2015_     | _Garten_Rebecca_ |

|      |             |                  |                            |                  |
|------|-------------|------------------|----------------------------|------------------|
| 5321 | 2015-07-27_ | _EPI_ISL_197561_ | _A/New_Mexico/22/2015_     | _Garten_Rebecca_ |
| 5322 | 2015-07-27_ | _EPI_ISL_202293_ | _A/Laos/1784/2015_         | _Takashita_Emi_  |
| 5323 | 2015-07-27_ | _EPI_ISL_202437_ | _A/Argentina/157/2015_     | _Garten_Rebecca_ |
| 5324 | 2015-07-27_ | _EPI_ISL_202438_ | _A/Argentina/158/2015_     | _Garten_Rebecca_ |
| 5325 | 2015-07-27_ | _EPI_ISL_203416_ | _A/Laos/769/2015_          | _Garten_Rebecca_ |
| 5326 | 2015-07-27_ | _EPI_ISL_205206_ | _A/Argentina/11611/2015_   | _Garten_Rebecca_ |
| 5327 | 2015-07-27_ | _EPI_ISL_205207_ | _A/Argentina/11611/2015_   | _Garten_Rebecca_ |
| 5328 | 2015-07-28_ | _EPI_ISL_202833_ | _A/Argentina/181/2015_     | _Garten_Rebecca_ |
| 5329 | 2015-07-29_ | _EPI_ISL_194163_ | _A/Ohio/21/2015_           | _Garten_Rebecca_ |
| 5330 | 2015-07-29_ | _EPI_ISL_195860_ | _A/Argentina/235/2015_     | _Garten_Rebecca_ |
| 5331 | 2015-07-29_ | _EPI_ISL_195877_ | _A/Argentina/234/2015_     | _Garten_Rebecca_ |
| 5332 | 2015-07-29_ | _EPI_ISL_197522_ | _A/New_York/59/2015_       | _Garten_Rebecca_ |
| 5333 | 2015-07-30_ | _EPI_ISL_194951_ | _A/Iowa/30/2015_           | _Garten_Rebecca_ |
| 5334 | 2015-07-30_ | _EPI_ISL_195854_ | _A/Iowa/22/2015_           | _Garten_Rebecca_ |
| 5335 | 2015-07-30_ | _EPI_ISL_195857_ | _A/Argentina/229/2015_     | _Garten_Rebecca_ |
| 5336 | 2015-07-30_ | _EPI_ISL_195858_ | _A/Iowa/23/2015_           | _Garten_Rebecca_ |
| 5337 | 2015-07-30_ | _EPI_ISL_195859_ | _A/Iowa/29/2015_           | _Garten_Rebecca_ |
| 5338 | 2015-07-30_ | _EPI_ISL_195861_ | _A/Argentina/236/2015_     | _Garten_Rebecca_ |
| 5339 | 2015-07-30_ | _EPI_ISL_195869_ | _A/Iowa/31/2015_           | _Garten_Rebecca_ |
| 5340 | 2015-07-30_ | _EPI_ISL_195880_ | _A/Iowa/25/2015_           | _Garten_Rebecca_ |
| 5341 | 2015-07-30_ | _EPI_ISL_195888_ | _A/Iowa/24/2015_           | _Garten_Rebecca_ |
| 5342 | 2015-07-30_ | _EPI_ISL_195892_ | _A/Iowa/28/2015_           | _Garten_Rebecca_ |
| 5343 | 2015-07-30_ | _EPI_ISL_197490_ | _A/Iowa/26/2015_           | _Garten_Rebecca_ |
| 5344 | 2015-07-30_ | _EPI_ISL_197546_ | _A/Iowa/37/2015_           | _Garten_Rebecca_ |
| 5345 | 2015-07-30_ | _EPI_ISL_197547_ | _A/Iowa/38/2015_           | _Garten_Rebecca_ |
| 5346 | 2015-07-30_ | _EPI_ISL_197563_ | _A/Iowa/34/2015_           | _Garten_Rebecca_ |
| 5347 | 2015-07-30_ | _EPI_ISL_205208_ | _A/Argentina/11628/2015_   | _Garten_Rebecca_ |
| 5348 | 2015-07-30_ | _EPI_ISL_205209_ | _A/Argentina/11628/2015_   | _Garten_Rebecca_ |
| 5349 | 2015-08-01_ | _EPI_ISL_195905_ | _A/Arizona/10/2015_        | _Garten_Rebecca_ |
| 5350 | 2015-08-01_ | _EPI_ISL_197528_ | _A/New_York/60/2015_       | _Garten_Rebecca_ |
| 5351 | 2015-08-01_ | _EPI_ISL_202820_ | _A/South_Dakota/36/2015_   | _Garten_Rebecca_ |
| 5352 | 2015-08-01_ | _EPI_ISL_203367_ | _A/England/53340242/2015_  | _Galiano_Monica_ |
| 5353 | 2015-08-02_ | _EPI_ISL_195834_ | _A/Alaska/135/2015_        | _Garten_Rebecca_ |
| 5354 | 2015-08-02_ | _EPI_ISL_195844_ | _A/Alaska/137/2015_        | _Garten_Rebecca_ |
| 5355 | 2015-08-02_ | _EPI_ISL_197261_ | _A/Nonthaburi/345/2015_    | _Garten_Rebecca_ |
| 5356 | 2015-08-02_ | _EPI_ISL_199515_ | _A/Wisconsin/71/2015_      | _Garten_Rebecca_ |
| 5357 | 2015-08-03_ | _EPI_ISL_195840_ | _A/Alaska/144/2015_        | _Garten_Rebecca_ |
| 5358 | 2015-08-03_ | _EPI_ISL_195842_ | _A/Alaska/138/2015_        | _Garten_Rebecca_ |
| 5359 | 2015-08-03_ | _EPI_ISL_195864_ | _A/Argentina/250/2015_     | _Garten_Rebecca_ |
| 5360 | 2015-08-03_ | _EPI_ISL_197274_ | _A/Paraguay/6248/2015_     | _Garten_Rebecca_ |
| 5361 | 2015-08-03_ | _EPI_ISL_197517_ | _A/Ohio/23/2015_           | _Garten_Rebecca_ |
| 5362 | 2015-08-03_ | _EPI_ISL_197533_ | _A/Ohio/24/2015_           | _Garten_Rebecca_ |
| 5363 | 2015-08-03_ | _EPI_ISL_197543_ | _A/New_York/58/2015_       | _Garten_Rebecca_ |
| 5364 | 2015-08-03_ | _EPI_ISL_202294_ | _A/Laos/1805/2015_         | _Takashita_Emi_  |
| 5365 | 2015-08-03_ | _EPI_ISL_202295_ | _A/Laos/1810/2015_         | _Takashita_Emi_  |
| 5366 | 2015-08-03_ | _EPI_ISL_203541_ | _A/Alaska/164/2015_        | _Garten_Rebecca_ |
| 5367 | 2015-08-03_ | _EPI_ISL_205167_ | _A/Alaska/153/2015_        | _Garten_Rebecca_ |
| 5368 | 2015-08-03_ | _EPI_ISL_205172_ | _A/Alaska/156/2015_        | _Garten_Rebecca_ |
| 5369 | 2015-08-03_ | _EPI_ISL_205173_ | _A/Alaska/156/2015_        | _Garten_Rebecca_ |
| 5370 | 2015-08-04_ | _EPI_ISL_195849_ | _A/Alaska/139/2015_        | _Garten_Rebecca_ |
| 5371 | 2015-08-04_ | _EPI_ISL_195867_ | _A/Argentina/255/2015_     | _Garten_Rebecca_ |
| 5372 | 2015-08-04_ | _EPI_ISL_195871_ | _A/Argentina/261/2015_     | _Garten_Rebecca_ |
| 5373 | 2015-08-04_ | _EPI_ISL_197276_ | _A/Paraguay/6991/2015_     | _Garten_Rebecca_ |
| 5374 | 2015-08-04_ | _EPI_ISL_197509_ | _A/New_York/62/2015_       | _Garten_Rebecca_ |
| 5375 | 2015-08-04_ | _EPI_ISL_203540_ | _A/Alaska/163/2015_        | _Garten_Rebecca_ |
| 5376 | 2015-08-05_ | _EPI_ISL_195841_ | _A/Alaska/141/2015_        | _Garten_Rebecca_ |
| 5377 | 2015-08-05_ | _EPI_ISL_197495_ | _A/Massachusetts/23/2015_  | _Garten_Rebecca_ |
| 5378 | 2015-08-05_ | _EPI_ISL_197756_ | _A/Arizona/13/2015_        | _Garten_Rebecca_ |
| 5379 | 2015-08-05_ | _EPI_ISL_203417_ | _A/Laos/794/2015_          | _Garten_Rebecca_ |
| 5380 | 2015-08-06_ | _EPI_ISL_194963_ | _A/Ecuador/1673/2015_      | _Garten_Rebecca_ |
| 5381 | 2015-08-06_ | _EPI_ISL_195843_ | _A/Texas/65/2015_          | _Garten_Rebecca_ |
| 5382 | 2015-08-06_ | _EPI_ISL_195847_ | _A/Alaska/143/2015_        | _Garten_Rebecca_ |
| 5383 | 2015-08-06_ | _EPI_ISL_197496_ | _A/Ecuador/1673/2015_      | _Garten_Rebecca_ |
| 5384 | 2015-08-06_ | _EPI_ISL_197539_ | _A/New_York/63/2015_       | _Garten_Rebecca_ |
| 5385 | 2015-08-06_ | _EPI_ISL_199512_ | _A/Wisconsin/70/2015_      | _Garten_Rebecca_ |
| 5386 | 2015-08-07_ | _EPI_ISL_197559_ | _A/Massachusetts/22/2015_  | _Garten_Rebecca_ |
| 5387 | 2015-08-07_ | _EPI_ISL_200711_ | _A/Puerto_Rico/07/2015_    | _Garten_Rebecca_ |
| 5388 | 2015-08-07_ | _EPI_ISL_203433_ | _A/Puerto_Rico/07/2015_    | _Garten_Rebecca_ |
| 5389 | 2015-08-08_ | _EPI_ISL_197564_ | _A/Montana/16/2015_        | _Garten_Rebecca_ |
| 5390 | 2015-08-08_ | _EPI_ISL_205170_ | _A/Alaska/155/2015_        | _Garten_Rebecca_ |
| 5391 | 2015-08-08_ | _EPI_ISL_205171_ | _A/Alaska/155/2015_        | _Garten_Rebecca_ |
| 5392 | 2015-08-09_ | _EPI_ISL_195726_ | _A/Florida/59/2015_        | _Garten_Rebecca_ |
| 5393 | 2015-08-09_ | _EPI_ISL_200724_ | _A/Florida/60/2015_        | _Garten_Rebecca_ |
| 5394 | 2015-08-10_ | _EPI_ISL_195837_ | _A/Alaska/142/2015_        | _Garten_Rebecca_ |
| 5395 | 2015-08-10_ | _EPI_ISL_197497_ | _A/New_York/64/2015_       | _Garten_Rebecca_ |
| 5396 | 2015-08-10_ | _EPI_ISL_199523_ | _A/New_York/64/2015_       | _Garten_Rebecca_ |
| 5397 | 2015-08-10_ | _EPI_ISL_200712_ | _A/Puerto_Rico/08/2015_    | _Garten_Rebecca_ |
| 5398 | 2015-08-10_ | _EPI_ISL_201269_ | _A/Bangladesh/803003/2015_ | _Garten_Rebecca_ |
| 5399 | 2015-08-10_ | _EPI_ISL_202074_ | _A/Bangladesh/5968/2015_   | _Garten_Rebecca_ |
| 5400 | 2015-08-10_ | _EPI_ISL_202296_ | _A/Laos/1847/2015_         | _Takashita_Emi_  |
| 5401 | 2015-08-10_ | _EPI_ISL_203434_ | _A/Puerto_Rico/08/2015_    | _Garten_Rebecca_ |
| 5402 | 2015-08-10_ | _EPI_ISL_203448_ | _A/Puerto_Rico/26/2015_    | _Garten_Rebecca_ |
| 5403 | 2015-08-10_ | _EPI_ISL_205214_ | _A/Argentina/11652/2015_   | _Garten_Rebecca_ |
| 5404 | 2015-08-10_ | _EPI_ISL_205215_ | _A/Argentina/11652/2015_   | _Garten_Rebecca_ |
| 5405 | 2015-08-11_ | _EPI_ISL_195846_ | _A/Alaska/140/2015_        | _Garten_Rebecca_ |
| 5406 | 2015-08-11_ | _EPI_ISL_199504_ | _A/Uruguay/86/2015_        | _Garten_Rebecca_ |
| 5407 | 2015-08-11_ | _EPI_ISL_200995_ | _A/Alaska/140/2015_        | _Garten_Rebecca_ |
| 5408 | 2015-08-11_ | _EPI_ISL_201228_ | _A/Puerto_Rico/09/2015_    | _Garten_Rebecca_ |
| 5409 | 2015-08-11_ | _EPI_ISL_202821_ | _A/South_Dakota/37/2015_   | _Garten_Rebecca_ |
| 5410 | 2015-08-11_ | _EPI_ISL_205210_ | _A/Argentina/11639/2015_   | _Garten_Rebecca_ |
| 5411 | 2015-08-11_ | _EPI_ISL_205212_ | _A/Argentina/11640/2015_   | _Garten_Rebecca_ |
| 5412 | 2015-08-11_ | _EPI_ISL_205213_ | _A/Argentina/11640/2015_   | _Garten_Rebecca_ |
| 5413 | 2015-08-11_ | _EPI_ISL_205216_ | _A/Argentina/11656/2015_   | _Garten_Rebecca_ |
| 5414 | 2015-08-11_ | _EPI_ISL_205217_ | _A/Argentina/11656/2015_   | _Garten_Rebecca_ |
| 5415 | 2015-08-11_ | _EPI_ISL_205616_ | _A/Laos/351/2015_          | _Garten_Rebecca_ |
| 5416 | 2015-08-11_ | _EPI_ISL_205617_ | _A/Laos/351/2015_          | _Garten_Rebecca_ |
| 5417 | 2015-08-11_ | _EPI_ISL_202084_ | _A/Bangladesh/12004/2015_  | _Garten_Rebecca_ |
| 5418 | 2015-08-12_ | _EPI_ISL_201264_ | _A/Bangladesh/7004/2015_   | _Garten_Rebecca_ |
| 5419 | 2015-08-12_ | _EPI_ISL_205218_ | _A/Argentina/11659/2015_   | _Garten_Rebecca_ |
| 5420 | 2015-08-12_ | _EPI_ISL_205219_ | _A/Argentina/11659/2015_   | _Garten_Rebecca_ |
| 5421 | 2015-08-12_ | _EPI_ISL_205282_ | _A/South_Africa/4940/2015_ | _Garten_Rebecca_ |
| 5422 | 2015-08-12_ | _EPI_ISL_205614_ | _A/Laos/844/2015_          | _Garten_Rebecca_ |
| 5423 | 2015-08-12_ | _EPI_ISL_205615_ | _A/Laos/853/2015_          | _Garten_Rebecca_ |
| 5424 | 2015-08-13_ | _EPI_ISL_197562_ | _A/Montana/17/2015_        | _Garten_Rebecca_ |
| 5425 | 2015-08-13_ | _EPI_ISL_199517_ | _A/Uruguay/122/2015_       | _Garten_Rebecca_ |
| 5426 | 2015-08-13_ | _EPI_ISL_202099_ | _A/Mississippi/13/2015_    | _Garten_Rebecca_ |
| 5427 | 2015-08-13_ | _EPI_ISL_202568_ | _A/New_Zealand/1703/2015_  | _Garten_Rebecca_ |
| 5428 | 2015-08-13_ | _EPI_ISL_203574_ | _A/Alaska/189/2015_        | _Garten_Rebecca_ |
| 5429 | 2015-08-13_ | _EPI_ISL_205182_ | _A/Alaska/157/2015_        | _Garten_Rebecca_ |
| 5430 | 2015-08-13_ | _EPI_ISL_205183_ | _A/Alaska/157/2015_        | _Garten_Rebecca_ |
| 5431 | 2015-08-14_ | _EPI_ISL_205184_ | _A/Alaska/158/2015_        | _Garten_Rebecca_ |
| 5432 | 2015-08-14_ | _EPI_ISL_205185_ | _A/Alaska/158/2015_        | _Garten_Rebecca_ |
| 5433 | 2015-08-14_ | _EPI_ISL_205277_ | _A/Bolivia/499/2015_       | _Garten_Rebecca_ |
| 5434 | 2015-08-15_ | _EPI_ISL_198219_ | _A/Michigan/41/2015_       | _Garten_Rebecca_ |
| 5435 | 2015-08-15_ | _EPI_ISL_203543_ | _A/Alaska/166/2015_        | _Garten_Rebecca_ |
| 5436 | 2015-08-15_ | _EPI_ISL_203544_ | _A/Alaska/167/2015_        | _Garten_Rebecca_ |
| 5437 | 2015-08-15_ | _EPI_ISL_203545_ | _A/Alaska/168/2015_        | _Garten_Rebecca_ |
| 5438 | 2015-08-15_ | _EPI_ISL_203573_ | _A/Alaska/188/2015_        | _Garten_Rebecca_ |
| 5439 | 2015-08-16_ | _EPI_ISL_203435_ | _A/Puerto_Rico/10/2015_    | _Garten_Rebecca_ |
| 5440 | 2015-08-16_ | _EPI_ISL_203570_ | _A/Alaska/179/2015_        | _Garten_Rebecca_ |
| 5441 | 2015-08-16_ | _EPI_ISL_203577_ | _A/Alaska/192/2015_        | _Garten_Rebecca_ |

|      |            |                  |                            |                  |
|------|------------|------------------|----------------------------|------------------|
| 5442 | 2015-08-16 | _EPI_ISL_205635_ | _A/Alaska/183/2015_        | _Garten_Rebecca_ |
| 5443 | 2015-08-17 | _EPI_ISL_195727_ | _A/Florida/64/2015_        | _Garten_Rebecca_ |
| 5444 | 2015-08-17 | _EPI_ISL_197489_ | _A/Ohio/26/2015_           | _Garten_Rebecca_ |
| 5445 | 2015-08-17 | _EPI_ISL_197535_ | _A/North_Carolina/29/2015_ | _Garten_Rebecca_ |
| 5446 | 2015-08-17 | _EPI_ISL_202083_ | _A/Bangladesh/3937/2015_   | _Garten_Rebecca_ |
| 5447 | 2015-08-17 | _EPI_ISL_203578_ | _A/Alaska/193/2015_        | _Garten_Rebecca_ |
| 5448 | 2015-08-17 | _EPI_ISL_203579_ | _A/Bangladesh/3937/2015_   | _Garten_Rebecca_ |
| 5449 | 2015-08-17 | _EPI_ISL_205186_ | _A/Alaska/159/2015_        | _Garten_Rebecca_ |
| 5450 | 2015-08-17 | _EPI_ISL_205187_ | _A/Alaska/159/2015_        | _Garten_Rebecca_ |
| 5451 | 2015-08-18 | _EPI_ISL_195728_ | _A/Florida/62/2015_        | _Garten_Rebecca_ |
| 5452 | 2015-08-18 | _EPI_ISL_195730_ | _A/Florida/63/2015_        | _Garten_Rebecca_ |
| 5453 | 2015-08-18 | _EPI_ISL_200725_ | _A/Alaska/160/2015_        | _Garten_Rebecca_ |
| 5454 | 2015-08-18 | _EPI_ISL_200727_ | _A/Tennessee/18/2015_      | _Garten_Rebecca_ |
| 5455 | 2015-08-18 | _EPI_ISL_200762_ | _A/Michigan/42/2015_       | _Garten_Rebecca_ |
| 5456 | 2015-08-18 | _EPI_ISL_201252_ | _A/Tennessee/19/2015_      | _Garten_Rebecca_ |
| 5457 | 2015-08-18 | _EPI_ISL_203553_ | _A/Alaska/178/2015_        | _Garten_Rebecca_ |
| 5458 | 2015-08-18 | _EPI_ISL_203576_ | _A/Alaska/191/2015_        | _Garten_Rebecca_ |
| 5459 | 2015-08-18 | _EPI_ISL_205278_ | _A/Bolivia/502/2015_       | _Garten_Rebecca_ |
| 5460 | 2015-08-19 | _EPI_ISL_195661_ | _A/Stockholm/40/2015_      | _Brytting_Maria_ |
| 5461 | 2015-08-19 | _EPI_ISL_195729_ | _A/Florida/61/2015_        | _Garten_Rebecca_ |
| 5462 | 2015-08-19 | _EPI_ISL_197794_ | _A/Hawaii/52/2015_         | _Garten_Rebecca_ |
| 5463 | 2015-08-19 | _EPI_ISL_200728_ | _A/Tennessee/20/2015_      | _Garten_Rebecca_ |
| 5464 | 2015-08-19 | _EPI_ISL_200729_ | _A/Tennessee/20/2015_      | _Garten_Rebecca_ |
| 5465 | 2015-08-19 | _EPI_ISL_201314_ | _A/Vermont/08/2015_        | _Garten_Rebecca_ |
| 5466 | 2015-08-19 | _EPI_ISL_203542_ | _A/Alaska/165/2015_        | _Garten_Rebecca_ |
| 5467 | 2015-08-19 | _EPI_ISL_203551_ | _A/Alaska/176/2015_        | _Garten_Rebecca_ |
| 5468 | 2015-08-19 | _EPI_ISL_203572_ | _A/Alaska/187/2015_        | _Garten_Rebecca_ |
| 5469 | 2015-08-19 | _EPI_ISL_203589_ | _A/Vermont/08/2015_        | _Garten_Rebecca_ |
| 5470 | 2015-08-19 | _EPI_ISL_205188_ | _A/Alaska/162/2015_        | _Garten_Rebecca_ |
| 5471 | 2015-08-19 | _EPI_ISL_205189_ | _A/Alaska/162/2015_        | _Garten_Rebecca_ |
| 5472 | 2015-08-20 | _EPI_ISL_197516_ | _A/North_Carolina/28/2015_ | _Garten_Rebecca_ |
| 5473 | 2015-08-20 | _EPI_ISL_201270_ | _A/Bangladesh/3007/2015_   | _Garten_Rebecca_ |
| 5474 | 2015-08-20 | _EPI_ISL_202076_ | _A/Bangladesh/22014/2015_  | _Garten_Rebecca_ |
| 5475 | 2015-08-20 | _EPI_ISL_203571_ | _A/Alaska/184/2015_        | _Garten_Rebecca_ |
| 5476 | 2015-08-20 | _EPI_ISL_205636_ | _A/Alaska/185/2015_        | _Garten_Rebecca_ |
| 5477 | 2015-08-21 | _EPI_ISL_198218_ | _A/Michigan/44/2015_       | _Garten_Rebecca_ |
| 5478 | 2015-08-21 | _EPI_ISL_202305_ | _A/Laos/0587/2015_         | _Takashita_Emi_  |
| 5479 | 2015-08-21 | _EPI_ISL_203546_ | _A/Alaska/170/2015_        | _Garten_Rebecca_ |
| 5480 | 2015-08-21 | _EPI_ISL_203552_ | _A/Alaska/177/2015_        | _Garten_Rebecca_ |
| 5481 | 2015-08-22 | _EPI_ISL_202306_ | _A/Laos/SA358/2015_        | _Takashita_Emi_  |
| 5482 | 2015-08-23 | _EPI_ISL_197796_ | _A/Hawaii/53/2015_         | _Garten_Rebecca_ |
| 5483 | 2015-08-23 | _EPI_ISL_202297_ | _A/Laos/0889/2015_         | _Takashita_Emi_  |
| 5484 | 2015-08-24 | _EPI_ISL_198217_ | _A/Michigan/43/2015_       | _Garten_Rebecca_ |
| 5485 | 2015-08-24 | _EPI_ISL_201266_ | _A/Bangladesh/3014/2015_   | _Garten_Rebecca_ |
| 5486 | 2015-08-24 | _EPI_ISL_201267_ | _A/Bangladesh/8016/2015_   | _Garten_Rebecca_ |
| 5487 | 2015-08-24 | _EPI_ISL_203437_ | _A/Puerto_Rico/12/2015_    | _Garten_Rebecca_ |
| 5488 | 2015-08-24 | _EPI_ISL_205618_ | _A/Laos/884/2015_          | _Garten_Rebecca_ |
| 5489 | 2015-08-24 | _EPI_ISL_205619_ | _A/Laos/898/2015_          | _Garten_Rebecca_ |
| 5490 | 2015-08-24 | _EPI_ISL_205642_ | _A/Puerto_Rico/12/2015_    | _Garten_Rebecca_ |
| 5491 | 2015-08-25 | _EPI_ISL_197793_ | _A/Texas/66/2015_          | _Garten_Rebecca_ |
| 5492 | 2015-08-25 | _EPI_ISL_197797_ | _A/New_York/65/2015_       | _Garten_Rebecca_ |
| 5493 | 2015-08-25 | _EPI_ISL_197799_ | _A/Hawaii/54/2015_         | _Garten_Rebecca_ |
| 5494 | 2015-08-25 | _EPI_ISL_200741_ | _A/New_York/65/2015_       | _Garten_Rebecca_ |
| 5495 | 2015-08-25 | _EPI_ISL_202391_ | _A/Peru/6915/2015_         | _Garten_Rebecca_ |
| 5496 | 2015-08-25 | _EPI_ISL_203547_ | _A/Alaska/171/2015_        | _Garten_Rebecca_ |
| 5497 | 2015-08-26 | _EPI_ISL_197774_ | _A/Arizona/14/2015_        | _Garten_Rebecca_ |
| 5498 | 2015-08-26 | _EPI_ISL_201268_ | _A/Bangladesh/1005/2015_   | _Garten_Rebecca_ |
| 5499 | 2015-08-26 | _EPI_ISL_203548_ | _A/Alaska/172/2015_        | _Garten_Rebecca_ |
| 5500 | 2015-08-28 | _EPI_ISL_197769_ | _A/Wisconsin/72/2015_      | _Garten_Rebecca_ |
| 5501 | 2015-08-28 | _EPI_ISL_203438_ | _A/Puerto_Rico/13/2015_    | _Garten_Rebecca_ |
| 5502 | 2015-08-28 | _EPI_ISL_205284_ | _A/South_Africa/5390/2015_ | _Garten_Rebecca_ |
| 5503 | 2015-08-29 | _EPI_ISL_197792_ | _A/Connecticut/02/2015_    | _Garten_Rebecca_ |
| 5504 | 2015-08-29 | _EPI_ISL_199505_ | _A/Hawaii/55/2015_         | _Garten_Rebecca_ |
| 5505 | 2015-08-29 | _EPI_ISL_201271_ | _A/Bangladesh/9015/2015_   | _Garten_Rebecca_ |
| 5506 | 2015-08-29 | _EPI_ISL_202108_ | _A/Bangladesh/5011/2015_   | _Garten_Rebecca_ |
| 5507 | 2015-08-30 | _EPI_ISL_202837_ | _A/Alaska/212/2015_        | _Garten_Rebecca_ |
| 5508 | 2015-08-30 | _EPI_ISL_202838_ | _A/Alaska/213/2015_        | _Garten_Rebecca_ |
| 5509 | 2015-08-30 | _EPI_ISL_202852_ | _A/California/84/2015_     | _Garten_Rebecca_ |
| 5510 | 2015-08-30 | _EPI_ISL_203440_ | _A/Puerto_Rico/15/2015_    | _Garten_Rebecca_ |
| 5511 | 2015-08-30 | _EPI_ISL_203549_ | _A/Alaska/174/2015_        | _Garten_Rebecca_ |
| 5512 | 2015-08-31 | _EPI_ISL_201265_ | _A/Bangladesh/7006/2015_   | _Garten_Rebecca_ |
| 5513 | 2015-08-31 | _EPI_ISL_201298_ | _A/Washington/41/2015_     | _Garten_Rebecca_ |
| 5514 | 2015-08-31 | _EPI_ISL_201299_ | _A/Washington/42/2015_     | _Garten_Rebecca_ |
| 5515 | 2015-08-31 | _EPI_ISL_201300_ | _A/Washington/43/2015_     | _Garten_Rebecca_ |
| 5516 | 2015-08-31 | _EPI_ISL_202839_ | _A/Alaska/214/2015_        | _Garten_Rebecca_ |
| 5517 | 2015-08-31 | _EPI_ISL_205223_ | _A/Indiana/17/2015_        | _Garten_Rebecca_ |
| 5518 | 2015-08-31 | _EPI_ISL_205224_ | _A/Indiana/17/2015_        | _Garten_Rebecca_ |
| 5519 | 2015-08-31 | _EPI_ISL_205620_ | _A/Laos/913/2015_          | _Garten_Rebecca_ |
| 5520 | 2015-09-01 | _EPI_ISL_197537_ | _A/Wisconsin/74/2015_      | _Garten_Rebecca_ |
| 5521 | 2015-09-01 | _EPI_ISL_197538_ | _A/Wisconsin/75/2015_      | _Garten_Rebecca_ |
| 5522 | 2015-09-01 | _EPI_ISL_197784_ | _A/Minnesota/40/2015_      | _Garten_Rebecca_ |
| 5523 | 2015-09-01 | _EPI_ISL_197795_ | _A/Wisconsin/77/2015_      | _Garten_Rebecca_ |
| 5524 | 2015-09-01 | _EPI_ISL_200743_ | _A/Minnesota/40/2015_      | _Garten_Rebecca_ |
| 5525 | 2015-09-01 | _EPI_ISL_200745_ | _A/Indiana/18/2015_        | _Garten_Rebecca_ |
| 5526 | 2015-09-01 | _EPI_ISL_200761_ | _A/Wisconsin/76/2015_      | _Garten_Rebecca_ |
| 5527 | 2015-09-01 | _EPI_ISL_201254_ | _A/New_Jersey/52/2015_     | _Garten_Rebecca_ |
| 5528 | 2015-09-01 | _EPI_ISL_201297_ | _A/Washington/40/2015_     | _Garten_Rebecca_ |
| 5529 | 2015-09-01 | _EPI_ISL_205225_ | _A/Indiana/19/2015_        | _Garten_Rebecca_ |
| 5530 | 2015-09-01 | _EPI_ISL_205226_ | _A/Indiana/19/2015_        | _Garten_Rebecca_ |
| 5531 | 2015-09-01 | _EPI_ISL_205227_ | _A/Indiana/20/2015_        | _Garten_Rebecca_ |
| 5532 | 2015-09-01 | _EPI_ISL_205228_ | _A/Indiana/20/2015_        | _Garten_Rebecca_ |
| 5533 | 2015-09-01 | _EPI_ISL_205229_ | _A/Indiana/21/2015_        | _Garten_Rebecca_ |
| 5534 | 2015-09-01 | _EPI_ISL_205230_ | _A/Indiana/21/2015_        | _Garten_Rebecca_ |
| 5535 | 2015-09-01 | _EPI_ISL_205231_ | _A/Indiana/22/2015_        | _Garten_Rebecca_ |
| 5536 | 2015-09-01 | _EPI_ISL_205232_ | _A/Indiana/22/2015_        | _Garten_Rebecca_ |
| 5537 | 2015-09-02 | _EPI_ISL_197791_ | _A/New_Hampshire/38/2015_  | _Garten_Rebecca_ |
| 5538 | 2015-09-02 | _EPI_ISL_197798_ | _A/Florida/68/2015_        | _Garten_Rebecca_ |
| 5539 | 2015-09-02 | _EPI_ISL_199514_ | _A/Hawaii/56/2015_         | _Garten_Rebecca_ |
| 5540 | 2015-09-02 | _EPI_ISL_200740_ | _A/New_Hampshire/38/2015_  | _Garten_Rebecca_ |
| 5541 | 2015-09-02 | _EPI_ISL_201257_ | _A/Alaska/208/2015_        | _Garten_Rebecca_ |
| 5542 | 2015-09-02 | _EPI_ISL_202298_ | _A/Laos/0917/2015_         | _Takashita_Emi_  |
| 5543 | 2015-09-03 | _EPI_ISL_200746_ | _A/Indiana/26/2015_        | _Garten_Rebecca_ |
| 5544 | 2015-09-03 | _EPI_ISL_200747_ | _A/Indiana/27/2015_        | _Garten_Rebecca_ |
| 5545 | 2015-09-03 | _EPI_ISL_202874_ | _A/Alaska/221/2015_        | _Garten_Rebecca_ |
| 5546 | 2015-09-03 | _EPI_ISL_203441_ | _A/Puerto_Rico/16/2015_    | _Garten_Rebecca_ |
| 5547 | 2015-09-03 | _EPI_ISL_205234_ | _A/Indiana/24/2015_        | _Garten_Rebecca_ |
| 5548 | 2015-09-03 | _EPI_ISL_205235_ | _A/Indiana/25/2015_        | _Garten_Rebecca_ |
| 5549 | 2015-09-03 | _EPI_ISL_205236_ | _A/Indiana/25/2015_        | _Garten_Rebecca_ |
| 5550 | 2015-09-04 | _EPI_ISL_202834_ | _A/Nebraska/18/2015_       | _Garten_Rebecca_ |
| 5551 | 2015-09-04 | _EPI_ISL_202840_ | _A/Alaska/215/2015_        | _Garten_Rebecca_ |
| 5552 | 2015-09-04 | _EPI_ISL_202873_ | _A/Alaska/220/2015_        | _Garten_Rebecca_ |
| 5553 | 2015-09-04 | _EPI_ISL_205267_ | _A/Iowa/40/2015_           | _Garten_Rebecca_ |
| 5554 | 2015-09-04 | _EPI_ISL_205268_ | _A/Iowa/40/2015_           | _Garten_Rebecca_ |
| 5555 | 2015-09-05 | _EPI_ISL_197782_ | _A/Alabama/12/2015_        | _Garten_Rebecca_ |
| 5556 | 2015-09-05 | _EPI_ISL_202082_ | _A/California/86/2015_     | _Garten_Rebecca_ |
| 5557 | 2015-09-05 | _EPI_ISL_202872_ | _A/Alaska/219/2015_        | _Garten_Rebecca_ |
| 5558 | 2015-09-06 | _EPI_ISL_202869_ | _A/Alaska/216/2015_        | _Garten_Rebecca_ |
| 5559 | 2015-09-06 | _EPI_ISL_203370_ | _A/England/334/2015_       | _Galiano_Monica_ |
| 5560 | 2015-09-06 | _EPI_ISL_203420_ | _A/New_York/67/2015_       | _Garten_Rebecca_ |
| 5561 | 2015-09-07 | _EPI_ISL_201255_ | _A/Alaska/206/2015_        | _Garten_Rebecca_ |
| 5562 | 2015-09-07 | _EPI_ISL_201301_ | _A/Washington/44/2015_     | _Garten_Rebecca_ |

|                  |                  |                                  |                  |
|------------------|------------------|----------------------------------|------------------|
| 5563 2015-09-07_ | _EPI_ISL_202299_ | _A/Laos/1924/2015_               | _Takashita_Emi_  |
| 5564 2015-09-07_ | _EPI_ISL_202301_ | _A/Laos/1935/2015_               | _Takashita_Emi_  |
| 5565 2015-09-07_ | _EPI_ISL_202302_ | _A/Laos/1936/2015_               | _Takashita_Emi_  |
| 5566 2015-09-07_ | _EPI_ISL_202307_ | _A/Laos/SA373/2015_              | _Takashita_Emi_  |
| 5567 2015-09-07_ | _EPI_ISL_202308_ | _A/Laos/SA380/2015_              | _Takashita_Emi_  |
| 5568 2015-09-07_ | _EPI_ISL_202835_ | _A/Alaska/210/2015_              | _Garten_Rebecca_ |
| 5569 2015-09-07_ | _EPI_ISL_202870_ | _A/Alaska/217/2015_              | _Garten_Rebecca_ |
| 5570 2015-09-07_ | _EPI_ISL_202871_ | _A/Alaska/218/2015_              | _Garten_Rebecca_ |
| 5571 2015-09-07_ | _EPI_ISL_203554_ | _A/Alaska/209/2015_              | _Garten_Rebecca_ |
| 5572 2015-09-08_ | _EPI_ISL_197783_ | _A/Alabama/10/2015_              | _Garten_Rebecca_ |
| 5573 2015-09-08_ | _EPI_ISL_197785_ | _A/Alabama/11/2015_              | _Garten_Rebecca_ |
| 5574 2015-09-08_ | _EPI_ISL_200744_ | _A/Alabama/10/2015_              | _Garten_Rebecca_ |
| 5575 2015-09-08_ | _EPI_ISL_202303_ | _A/Laos/1941/2015_               | _Takashita_Emi_  |
| 5576 2015-09-08_ | _EPI_ISL_202875_ | _A/Alaska/222/2015_              | _Garten_Rebecca_ |
| 5577 2015-09-08_ | _EPI_ISL_203567_ | _A/Nigeria/253/2015_             | _Garten_Rebecca_ |
| 5578 2015-09-08_ | _EPI_ISL_205622_ | _A/Laos/375/2015_                | _Garten_Rebecca_ |
| 5579 2015-09-08_ | _EPI_ISL_205623_ | _A/Laos/375/2015_                | _Garten_Rebecca_ |
| 5580 2015-09-08_ | _EPI_ISL_205637_ | _A/Alaska/222/2015_              | _Garten_Rebecca_ |
| 5581 2015-09-08_ | _EPI_ISL_205644_ | _A/Puerto_Rico/19/2015_          | _Garten_Rebecca_ |
| 5582 2015-09-09_ | _EPI_ISL_202075_ | _A/California/85/2015_           | _Garten_Rebecca_ |
| 5583 2015-09-09_ | _EPI_ISL_202300_ | _A/Laos/1929/2015_               | _Takashita_Emi_  |
| 5584 2015-09-09_ | _EPI_ISL_202411_ | _A/British_Columbia/RV2356/2015_ | _Garten_Rebecca_ |
| 5585 2015-09-09_ | _EPI_ISL_202418_ | _A/Alberta/RV2338/2015_          | _Garten_Rebecca_ |
| 5586 2015-09-09_ | _EPI_ISL_202884_ | _A/Alaska/232/2015_              | _Garten_Rebecca_ |
| 5587 2015-09-09_ | _EPI_ISL_203443_ | _A/Puerto_Rico/20/2015_          | _Garten_Rebecca_ |
| 5588 2015-09-09_ | _EPI_ISL_203444_ | _A/Puerto_Rico/22/2015_          | _Garten_Rebecca_ |
| 5589 2015-09-09_ | _EPI_ISL_203450_ | _A/South_Dakota/38/2015_         | _Garten_Rebecca_ |
| 5590 2015-09-09_ | _EPI_ISL_205237_ | _A/New_Hampshire/39/2015_        | _Garten_Rebecca_ |
| 5591 2015-09-09_ | _EPI_ISL_205238_ | _A/New_Hampshire/39/2015_        | _Garten_Rebecca_ |
| 5592 2015-09-09_ | _EPI_ISL_205621_ | _A/Laos/928/2015_                | _Garten_Rebecca_ |
| 5593 2015-09-09_ | _EPI_ISL_205643_ | _A/Puerto_Rico/17/2015_          | _Garten_Rebecca_ |
| 5594 2015-09-09_ | _EPI_ISL_205645_ | _A/Puerto_Rico/20/2015_          | _Garten_Rebecca_ |
| 5595 2015-09-10_ | _EPI_ISL_202081_ | _A/California/83/2015_           | _Garten_Rebecca_ |
| 5596 2015-09-10_ | _EPI_ISL_202896_ | _A/Alaska/245/2015_              | _Garten_Rebecca_ |
| 5597 2015-09-10_ | _EPI_ISL_205221_ | _A/Massachusetts/25/2015_        | _Garten_Rebecca_ |
| 5598 2015-09-10_ | _EPI_ISL_205222_ | _A/Massachusetts/25/2015_        | _Garten_Rebecca_ |
| 5599 2015-09-10_ | _EPI_ISL_205265_ | _A/New_Mexico/25/2015_           | _Garten_Rebecca_ |
| 5600 2015-09-10_ | _EPI_ISL_205266_ | _A/New_Mexico/25/2015_           | _Garten_Rebecca_ |
| 5601 2015-09-10_ | _EPI_ISL_205269_ | _A/Iowa/41/2015_                 | _Garten_Rebecca_ |
| 5602 2015-09-10_ | _EPI_ISL_205270_ | _A/Iowa/41/2015_                 | _Garten_Rebecca_ |
| 5603 2015-09-10_ | _EPI_ISL_205271_ | _A/Iowa/42/2015_                 | _Garten_Rebecca_ |
| 5604 2015-09-10_ | _EPI_ISL_205272_ | _A/Iowa/42/2015_                 | _Garten_Rebecca_ |
| 5605 2015-09-11_ | _EPI_ISL_200749_ | _A/Montana/18/2015_              | _Garten_Rebecca_ |
| 5606 2015-09-11_ | _EPI_ISL_202412_ | _A/British_Columbia/RV2357/2015_ | _Garten_Rebecca_ |
| 5607 2015-09-11_ | _EPI_ISL_202879_ | _A/Alaska/227/2015_              | _Garten_Rebecca_ |
| 5608 2015-09-11_ | _EPI_ISL_203447_ | _A/Puerto_Rico/25/2015_          | _Garten_Rebecca_ |
| 5609 2015-09-11_ | _EPI_ISL_205638_ | _A/Alaska/225/2015_              | _Garten_Rebecca_ |
| 5610 2015-09-12_ | _EPI_ISL_200766_ | _A/Michigan/53/2015_             | _Garten_Rebecca_ |
| 5611 2015-09-12_ | _EPI_ISL_202414_ | _A/Alberta/RV2339/2015_          | _Garten_Rebecca_ |
| 5612 2015-09-12_ | _EPI_ISL_202880_ | _A/Alaska/228/2015_              | _Garten_Rebecca_ |
| 5613 2015-09-12_ | _EPI_ISL_202889_ | _A/Alaska/237/2015_              | _Garten_Rebecca_ |
| 5614 2015-09-12_ | _EPI_ISL_203445_ | _A/Puerto_Rico/23/2015_          | _Garten_Rebecca_ |
| 5615 2015-09-12_ | _EPI_ISL_203446_ | _A/Puerto_Rico/24/2015_          | _Garten_Rebecca_ |
| 5616 2015-09-12_ | _EPI_ISL_203582_ | _A/Michigan/53/2015_             | _Garten_Rebecca_ |
| 5617 2015-09-12_ | _EPI_ISL_205263_ | _A/New_Mexico/23/2015_           | _Garten_Rebecca_ |
| 5618 2015-09-12_ | _EPI_ISL_205264_ | _A/New_Mexico/23/2015_           | _Garten_Rebecca_ |
| 5619 2015-09-13_ | _EPI_ISL_199518_ | _A/Hawaii/57/2015_               | _Garten_Rebecca_ |
| 5620 2015-09-13_ | _EPI_ISL_200750_ | _A/Montana/19/2015_              | _Garten_Rebecca_ |
| 5621 2015-09-13_ | _EPI_ISL_202089_ | _A/New_Mexico/26/2015_           | _Garten_Rebecca_ |
| 5622 2015-09-13_ | _EPI_ISL_202881_ | _A/Alaska/229/2015_              | _Garten_Rebecca_ |
| 5623 2015-09-13_ | _EPI_ISL_202897_ | _A/Alaska/246/2015_              | _Garten_Rebecca_ |
| 5624 2015-09-13_ | _EPI_ISL_203586_ | _A/New_Mexico/26/2015_           | _Garten_Rebecca_ |
| 5625 2015-09-13_ | _EPI_ISL_205640_ | _A/Alaska/242/2015_              | _Garten_Rebecca_ |
| 5626 2015-09-14_ | _EPI_ISL_199507_ | _A/Florida/73/2015_              | _Garten_Rebecca_ |
| 5627 2015-09-14_ | _EPI_ISL_200752_ | _A/Montana/21/2015_              | _Garten_Rebecca_ |
| 5628 2015-09-14_ | _EPI_ISL_200765_ | _A/Michigan/52/2015_             | _Garten_Rebecca_ |
| 5629 2015-09-14_ | _EPI_ISL_201305_ | _A/Minnesota/42/2015_            | _Garten_Rebecca_ |
| 5630 2015-09-14_ | _EPI_ISL_202413_ | _A/British_Columbia/RV2358/2015_ | _Garten_Rebecca_ |
| 5631 2015-09-14_ | _EPI_ISL_202882_ | _A/Alaska/230/2015_              | _Garten_Rebecca_ |
| 5632 2015-09-14_ | _EPI_ISL_202894_ | _A/Alaska/243/2015_              | _Garten_Rebecca_ |
| 5633 2015-09-14_ | _EPI_ISL_202895_ | _A/Alaska/244/2015_              | _Garten_Rebecca_ |
| 5634 2015-09-14_ | _EPI_ISL_203371_ | _A/England/53860135/2015_        | _Galiano_Monica_ |
| 5635 2015-09-14_ | _EPI_ISL_205239_ | _A/New_Hampshire/40/2015_        | _Garten_Rebecca_ |
| 5636 2015-09-14_ | _EPI_ISL_205240_ | _A/New_Hampshire/40/2015_        | _Garten_Rebecca_ |
| 5637 2015-09-14_ | _EPI_ISL_205241_ | _A/Minnesota/41/2015_            | _Garten_Rebecca_ |
| 5638 2015-09-14_ | _EPI_ISL_205242_ | _A/Minnesota/41/2015_            | _Garten_Rebecca_ |
| 5639 2015-09-14_ | _EPI_ISL_205251_ | _A/Wisconsin/80/2015_            | _Garten_Rebecca_ |
| 5640 2015-09-14_ | _EPI_ISL_205252_ | _A/Wisconsin/80/2015_            | _Garten_Rebecca_ |
| 5641 2015-09-14_ | _EPI_ISL_205273_ | _A/Iowa/43/2015_                 | _Garten_Rebecca_ |
| 5642 2015-09-14_ | _EPI_ISL_205274_ | _A/Iowa/43/2015_                 | _Garten_Rebecca_ |
| 5643 2015-09-15_ | _EPI_ISL_200751_ | _A/Montana/20/2015_              | _Garten_Rebecca_ |
| 5644 2015-09-15_ | _EPI_ISL_201307_ | _A/Hawaii/58/2015_               | _Garten_Rebecca_ |
| 5645 2015-09-15_ | _EPI_ISL_202883_ | _A/Alaska/231/2015_              | _Garten_Rebecca_ |
| 5646 2015-09-15_ | _EPI_ISL_202892_ | _A/Alaska/240/2015_              | _Garten_Rebecca_ |
| 5647 2015-09-15_ | _EPI_ISL_205243_ | _A/Florida/69/2015_              | _Garten_Rebecca_ |
| 5648 2015-09-15_ | _EPI_ISL_205244_ | _A/Florida/69/2015_              | _Garten_Rebecca_ |
| 5649 2015-09-15_ | _EPI_ISL_205245_ | _A/Florida/70/2015_              | _Garten_Rebecca_ |
| 5650 2015-09-15_ | _EPI_ISL_205246_ | _A/Florida/70/2015_              | _Garten_Rebecca_ |
| 5651 2015-09-15_ | _EPI_ISL_205247_ | _A/Florida/71/2015_              | _Garten_Rebecca_ |
| 5652 2015-09-15_ | _EPI_ISL_205248_ | _A/Florida/71/2015_              | _Garten_Rebecca_ |
| 5653 2015-09-15_ | _EPI_ISL_205249_ | _A/Florida/72/2015_              | _Garten_Rebecca_ |
| 5654 2015-09-15_ | _EPI_ISL_205250_ | _A/Florida/72/2015_              | _Garten_Rebecca_ |
| 5655 2015-09-15_ | _EPI_ISL_205257_ | _A/Tennessee/21/2015_            | _Garten_Rebecca_ |
| 5656 2015-09-15_ | _EPI_ISL_205258_ | _A/Tennessee/21/2015_            | _Garten_Rebecca_ |
| 5657 2015-09-16_ | _EPI_ISL_202887_ | _A/Alaska/235/2015_              | _Garten_Rebecca_ |
| 5658 2015-09-16_ | _EPI_ISL_202888_ | _A/Alaska/236/2015_              | _Garten_Rebecca_ |
| 5659 2015-09-16_ | _EPI_ISL_202890_ | _A/Alaska/238/2015_              | _Garten_Rebecca_ |
| 5660 2015-09-16_ | _EPI_ISL_202891_ | _A/Alaska/239/2015_              | _Garten_Rebecca_ |
| 5661 2015-09-16_ | _EPI_ISL_202893_ | _A/Alaska/241/2015_              | _Garten_Rebecca_ |
| 5662 2015-09-16_ | _EPI_ISL_205639_ | _A/Alaska/239/2015_              | _Garten_Rebecca_ |
| 5663 2015-09-17_ | _EPI_ISL_200753_ | _A/Montana/23/2015_              | _Garten_Rebecca_ |
| 5664 2015-09-17_ | _EPI_ISL_200756_ | _A/Montana/26/2015_              | _Garten_Rebecca_ |
| 5665 2015-09-17_ | _EPI_ISL_201258_ | _A/Ohio/27/2015_                 | _Garten_Rebecca_ |
| 5666 2015-09-17_ | _EPI_ISL_201259_ | _A/Ohio/28/2015_                 | _Garten_Rebecca_ |
| 5667 2015-09-17_ | _EPI_ISL_201260_ | _A/Ohio/29/2015_                 | _Garten_Rebecca_ |
| 5668 2015-09-17_ | _EPI_ISL_201306_ | _A/Minnesota/43/2015_            | _Garten_Rebecca_ |
| 5669 2015-09-17_ | _EPI_ISL_202808_ | _A/Ontario/RV2371/2015_          | _Garten_Rebecca_ |
| 5670 2015-09-17_ | _EPI_ISL_202898_ | _A/Alaska/247/2015_              | _Garten_Rebecca_ |
| 5671 2015-09-17_ | _EPI_ISL_202899_ | _A/Alaska/249/2015_              | _Garten_Rebecca_ |
| 5672 2015-09-17_ | _EPI_ISL_205255_ | _A/Wisconsin/82/2015_            | _Garten_Rebecca_ |
| 5673 2015-09-17_ | _EPI_ISL_205256_ | _A/Wisconsin/82/2015_            | _Garten_Rebecca_ |
| 5674 2015-09-17_ | _EPI_ISL_205259_ | _A/Ohio/27/2015_                 | _Garten_Rebecca_ |
| 5675 2015-09-17_ | _EPI_ISL_205260_ | _A/Ohio/28/2015_                 | _Garten_Rebecca_ |
| 5676 2015-09-18_ | _EPI_ISL_200768_ | _A/Michigan/55/2015_             | _Garten_Rebecca_ |
| 5677 2015-09-18_ | _EPI_ISL_201310_ | _A/Idaho/25/2015_                | _Garten_Rebecca_ |
| 5678 2015-09-18_ | _EPI_ISL_202806_ | _A/Alberta/RV2362/2015_          | _Garten_Rebecca_ |
| 5679 2015-09-18_ | _EPI_ISL_202807_ | _A/Alberta/RV2363/2015_          | _Garten_Rebecca_ |
| 5680 2015-09-18_ | _EPI_ISL_203405_ | _A/Alaska/251/2015_              | _Garten_Rebecca_ |
| 5681 2015-09-18_ | _EPI_ISL_203581_ | _A/Idaho/25/2015_                | _Garten_Rebecca_ |
| 5682 2015-09-18_ | _EPI_ISL_203584_ | _A/Michigan/55/2015_             | _Garten_Rebecca_ |
| 5683 2015-09-18_ | _EPI_ISL_205253_ | _A/Wisconsin/81/2015_            | _Garten_Rebecca_ |

|      |            |                  |                            |                  |
|------|------------|------------------|----------------------------|------------------|
| 5684 | 2015-09-18 | _EPI_ISL_205254_ | _A/Wisconsin/81/2015_      | _Garten_Rebecca_ |
| 5685 | 2015-09-18 | _EPI_ISL_203418_ | _A/Montana/24/2015_        | _Garten_Rebecca_ |
| 5686 | 2015-09-19 | _EPI_ISL_200755_ | _A/Montana/25/2015_        | _Garten_Rebecca_ |
| 5687 | 2015-09-19 | _EPI_ISL_200767_ | _A/Michigan/54/2015_       | _Garten_Rebecca_ |
| 5688 | 2015-09-19 | _EPI_ISL_202842_ | _A/Washington/47/2015_     | _Garten_Rebecca_ |
| 5689 | 2015-09-19 | _EPI_ISL_202843_ | _A/Washington/48/2015_     | _Garten_Rebecca_ |
| 5690 | 2015-09-19 | _EPI_ISL_203404_ | _A/Alaska/248/2015_        | _Garten_Rebecca_ |
| 5691 | 2015-09-19 | _EPI_ISL_203583_ | _A/Michigan/54/2015_       | _Garten_Rebecca_ |
| 5692 | 2015-09-20 | _EPI_ISL_200757_ | _A/Montana/27/2015_        | _Garten_Rebecca_ |
| 5693 | 2015-09-20 | _EPI_ISL_202848_ | _A/Arizona/15/2015_        | _Garten_Rebecca_ |
| 5694 | 2015-09-21 | _EPI_ISL_203587_ | _A/Nigeria/299/2015_       | _Garten_Rebecca_ |
| 5695 | 2015-09-22 | _EPI_ISL_201302_ | _A/Wyoming/18/2015_        | _Garten_Rebecca_ |
| 5696 | 2015-09-22 | _EPI_ISL_203588_ | _A/Nigeria/300/2015_       | _Garten_Rebecca_ |
| 5697 | 2015-09-22 | _EPI_ISL_205275_ | _A/Wyoming/18/2015_        | _Garten_Rebecca_ |
| 5698 | 2015-09-24 | _EPI_ISL_200759_ | _A/Wisconsin/83/2015_      | _Garten_Rebecca_ |
| 5699 | 2015-09-24 | _EPI_ISL_200769_ | _A/Montana/28/2015_        | _Garten_Rebecca_ |
| 5700 | 2015-09-24 | _EPI_ISL_201261_ | _A/Massachusetts/26/2015_  | _Garten_Rebecca_ |
| 5701 | 2015-09-24 | _EPI_ISL_201303_ | _A/Montana/28/2015_        | _Garten_Rebecca_ |
| 5702 | 2015-09-24 | _EPI_ISL_202079_ | _A/California/89/2015_     | _Garten_Rebecca_ |
| 5703 | 2015-09-24 | _EPI_ISL_205262_ | _A/Massachusetts/26/2015_  | _Garten_Rebecca_ |
| 5704 | 2015-09-24 | _EPI_ISL_205500_ | _A/Montana/28/2015_        | _Garten_Rebecca_ |
| 5705 | 2015-09-26 | _EPI_ISL_199503_ | _A/Stockholm/42/2015_      | _Brytting_Maria_ |
| 5706 | 2015-09-26 | _EPI_ISL_200770_ | _A/Montana/29/2015_        | _Garten_Rebecca_ |
| 5707 | 2015-09-26 | _EPI_ISL_201304_ | _A/Montana/29/2015_        | _Garten_Rebecca_ |
| 5708 | 2015-09-26 | _EPI_ISL_201308_ | _A/Hawaii/60/2015_         | _Garten_Rebecca_ |
| 5709 | 2015-09-28 | _EPI_ISL_200758_ | _A/Kentucky/15/2015_       | _Garten_Rebecca_ |
| 5710 | 2015-09-28 | _EPI_ISL_201262_ | _A/Kentucky/15/2015_       | _Garten_Rebecca_ |
| 5711 | 2015-09-28 | _EPI_ISL_201274_ | _A/North_Carolina/32/2015_ | _Garten_Rebecca_ |
| 5712 | 2015-09-28 | _EPI_ISL_201275_ | _A/North_Carolina/32/2015_ | _Garten_Rebecca_ |
| 5713 | 2015-09-28 | _EPI_ISL_202407_ | _A/Indiana/28/2015_        | _Garten_Rebecca_ |
| 5714 | 2015-09-28 | _EPI_ISL_201309_ | _A/Hawaii/61/2015_         | _Garten_Rebecca_ |
| 5715 | 2015-09-28 | _EPI_ISL_202810_ | _A/Alberta/RV2373/2015_    | _Garten_Rebecca_ |
| 5716 | 2015-09-28 | _EPI_ISL_202849_ | _A/Arizona/16/2015_        | _Garten_Rebecca_ |
| 5717 | 2015-09-28 | _EPI_ISL_202850_ | _A/Arizona/17/2015_        | _Garten_Rebecca_ |
| 5718 | 2015-09-28 | _EPI_ISL_202900_ | _A/Hawaii/62/2015_         | _Garten_Rebecca_ |
| 5719 | 2015-09-28 | _EPI_ISL_202901_ | _A/Hawaii/63/2015_         | _Garten_Rebecca_ |
| 5720 | 2015-09-28 | _EPI_ISL_203564_ | _A/Hawaii/64/2015_         | _Garten_Rebecca_ |
| 5721 | 2015-09-28 | _EPI_ISL_205606_ | _A/Alberta/RV2373/2015_    | _Garten_Rebecca_ |
| 5722 | 2015-09-28 | _EPI_ISL_205641_ | _A/Hawaii/62/2015_         | _Garten_Rebecca_ |
| 5723 | 2015-09-29 | _EPI_ISL_202401_ | _A/Michigan/62/2015_       | _Garten_Rebecca_ |
| 5724 | 2015-09-29 | _EPI_ISL_202809_ | _A/Alberta/RV2372/2015_    | _Garten_Rebecca_ |
| 5725 | 2015-09-29 | _EPI_ISL_203406_ | _A/Alberta/RV2372/2015_    | _Garten_Rebecca_ |
| 5726 | 2015-09-29 | _EPI_ISL_203555_ | _A/Arizona/19/2015_        | _Garten_Rebecca_ |
| 5727 | 2015-09-30 | _EPI_ISL_201315_ | _A/Vermont/09/2015_        | _Garten_Rebecca_ |
| 5728 | 2015-09-30 | _EPI_ISL_202851_ | _A/Arizona/18/2015_        | _Garten_Rebecca_ |
| 5729 | 2015-09-30 | _EPI_ISL_205283_ | _A/South_Africa/6131/2015_ | _Garten_Rebecca_ |
| 5730 | 2015-10-01 | _EPI_ISL_200760_ | _A/Wisconsin/84/2015_      | _Garten_Rebecca_ |
| 5731 | 2015-10-01 | _EPI_ISL_201273_ | _A/Florida/75/2015_        | _Garten_Rebecca_ |
| 5732 | 2015-10-01 | _EPI_ISL_202077_ | _A/California/91/2015_     | _Garten_Rebecca_ |
| 5733 | 2015-10-01 | _EPI_ISL_202078_ | _A/California/87/2015_     | _Garten_Rebecca_ |
| 5734 | 2015-10-01 | _EPI_ISL_202408_ | _A/Alberta/RV2382/2015_    | _Garten_Rebecca_ |
| 5735 | 2015-10-01 | _EPI_ISL_205607_ | _A/Alberta/RV2382/2015_    | _Garten_Rebecca_ |
| 5736 | 2015-10-02 | _EPI_ISL_201285_ | _A/Arizona/21/2015_        | _Garten_Rebecca_ |
| 5737 | 2015-10-02 | _EPI_ISL_201293_ | _A/Alaska/253/2015_        | _Garten_Rebecca_ |
| 5738 | 2015-10-02 | _EPI_ISL_201316_ | _A/Pennsylvania/36/2015_   | _Garten_Rebecca_ |
| 5739 | 2015-10-02 | _EPI_ISL_203379_ | _A/England/54380710/2015_  | _Galiano_Monica_ |
| 5740 | 2015-10-02 | _EPI_ISL_205281_ | _A/South_Africa/6270/2015_ | _Garten_Rebecca_ |
| 5741 | 2015-10-03 | _EPI_ISL_201272_ | _A/Florida/74/2015_        | _Garten_Rebecca_ |
| 5742 | 2015-10-03 | _EPI_ISL_202112_ | _A/Hawaii/66/2015_         | _Garten_Rebecca_ |
| 5743 | 2015-10-04 | _EPI_ISL_201279_ | _A/Missouri/41/2015_       | _Garten_Rebecca_ |
| 5744 | 2015-10-04 | _EPI_ISL_201280_ | _A/Missouri/42/2015_       | _Garten_Rebecca_ |
| 5745 | 2015-10-04 | _EPI_ISL_201284_ | _A/Arizona/20/2015_        | _Garten_Rebecca_ |
| 5746 | 2015-10-04 | _EPI_ISL_202101_ | _A/Washington/49/2015_     | _Garten_Rebecca_ |
| 5747 | 2015-10-04 | _EPI_ISL_202111_ | _A/Hawaii/65/2015_         | _Garten_Rebecca_ |
| 5748 | 2015-10-04 | _EPI_ISL_202903_ | _A/Michigan/58/2015_       | _Garten_Rebecca_ |
| 5749 | 2015-10-04 | _EPI_ISL_202904_ | _A/Hawaii/69/2015_         | _Garten_Rebecca_ |
| 5750 | 2015-10-04 | _EPI_ISL_202905_ | _A/Hawaii/69/2015_         | _Garten_Rebecca_ |
| 5751 | 2015-10-04 | _EPI_ISL_205633_ | _A/Missouri/42/2015_       | _Garten_Rebecca_ |
| 5752 | 2015-10-05 | _EPI_ISL_201294_ | _A/Alaska/254/2015_        | _Garten_Rebecca_ |
| 5753 | 2015-10-05 | _EPI_ISL_201296_ | _A/Alaska/256/2015_        | _Garten_Rebecca_ |
| 5754 | 2015-10-05 | _EPI_ISL_202106_ | _A/Florida/81/2015_        | _Garten_Rebecca_ |
| 5755 | 2015-10-05 | _EPI_ISL_202110_ | _A/Hawaii/67/2015_         | _Garten_Rebecca_ |
| 5756 | 2015-10-05 | _EPI_ISL_202113_ | _A/Hawaii/68/2015_         | _Garten_Rebecca_ |
| 5757 | 2015-10-05 | _EPI_ISL_202906_ | _A/Hawaii/70/2015_         | _Garten_Rebecca_ |
| 5758 | 2015-10-05 | _EPI_ISL_202907_ | _A/Hawaii/70/2015_         | _Garten_Rebecca_ |
| 5759 | 2015-10-05 | _EPI_ISL_203585_ | _A/Michigan/60/2015_       | _Garten_Rebecca_ |
| 5760 | 2015-10-05 | _EPI_ISL_205625_ | _A/Michigan/60/2015_       | _Garten_Rebecca_ |
| 5761 | 2015-10-05 | _EPI_ISL_205626_ | _A/Michigan/60/2015_       | _Garten_Rebecca_ |
| 5762 | 2015-10-06 | _EPI_ISL_201281_ | _A/Montana/30/2015_        | _Garten_Rebecca_ |
| 5763 | 2015-10-06 | _EPI_ISL_201295_ | _A/Alaska/255/2015_        | _Garten_Rebecca_ |
| 5764 | 2015-10-06 | _EPI_ISL_201312_ | _A/Texas/69/2015_          | _Garten_Rebecca_ |
| 5765 | 2015-10-06 | _EPI_ISL_201313_ | _A/Texas/70/2015_          | _Garten_Rebecca_ |
| 5766 | 2015-10-06 | _EPI_ISL_202931_ | _A/South_Carolina/10/2015_ | _Garten_Rebecca_ |
| 5767 | 2015-10-06 | _EPI_ISL_202932_ | _A/South_Carolina/10/2015_ | _Garten_Rebecca_ |
| 5768 | 2015-10-07 | _EPI_ISL_201100_ | _A/Stockholm/43/2015_      | _Brytting_Maria_ |
| 5769 | 2015-10-07 | _EPI_ISL_201276_ | _A/Maine/39/2015_          | _Garten_Rebecca_ |
| 5770 | 2015-10-07 | _EPI_ISL_201282_ | _A/Montana/31/2015_        | _Garten_Rebecca_ |
| 5771 | 2015-10-07 | _EPI_ISL_201286_ | _A/Arizona/22/2015_        | _Garten_Rebecca_ |
| 5772 | 2015-10-07 | _EPI_ISL_202429_ | _A/Washington/55/2015_     | _Garten_Rebecca_ |
| 5773 | 2015-10-07 | _EPI_ISL_202812_ | _A/Ontario/RV2377/2015_    | _Garten_Rebecca_ |
| 5774 | 2015-10-07 | _EPI_ISL_202813_ | _A/Ontario/RV2377/2015_    | _Garten_Rebecca_ |
| 5775 | 2015-10-07 | _EPI_ISL_202814_ | _A/Ontario/RV2378/2015_    | _Garten_Rebecca_ |
| 5776 | 2015-10-07 | _EPI_ISL_202815_ | _A/Ontario/RV2378/2015_    | _Garten_Rebecca_ |
| 5777 | 2015-10-07 | _EPI_ISL_202816_ | _A/Ontario/RV2379/2015_    | _Garten_Rebecca_ |
| 5778 | 2015-10-07 | _EPI_ISL_202817_ | _A/Ontario/RV2379/2015_    | _Garten_Rebecca_ |
| 5779 | 2015-10-07 | _EPI_ISL_202818_ | _A/Ontario/RV2380/2015_    | _Garten_Rebecca_ |
| 5780 | 2015-10-07 | _EPI_ISL_202819_ | _A/Ontario/RV2380/2015_    | _Garten_Rebecca_ |
| 5781 | 2015-10-08 | _EPI_ISL_201287_ | _A/Oregon/19/2015_         | _Garten_Rebecca_ |
| 5782 | 2015-10-08 | _EPI_ISL_202104_ | _A/West_Virginia/73/2015_  | _Garten_Rebecca_ |
| 5783 | 2015-10-08 | _EPI_ISL_202918_ | _A/Hawaii/72/2015_         | _Garten_Rebecca_ |
| 5784 | 2015-10-08 | _EPI_ISL_202919_ | _A/Hawaii/72/2015_         | _Garten_Rebecca_ |
| 5785 | 2015-10-08 | _EPI_ISL_205660_ | _A/Maryland/17/2015_       | _Garten_Rebecca_ |
| 5786 | 2015-10-09 | _EPI_ISL_201101_ | _A/Stockholm/44/2015_      | _Brytting_Maria_ |
| 5787 | 2015-10-09 | _EPI_ISL_201103_ | _A/Stockholm/45/2015_      | _Brytting_Maria_ |
| 5788 | 2015-10-09 | _EPI_ISL_201277_ | _A/Maine/40/2015_          | _Garten_Rebecca_ |
| 5789 | 2015-10-09 | _EPI_ISL_201288_ | _A/Oregon/20/2015_         | _Garten_Rebecca_ |
| 5790 | 2015-10-09 | _EPI_ISL_201289_ | _A/Oregon/21/2015_         | _Garten_Rebecca_ |
| 5791 | 2015-10-09 | _EPI_ISL_201290_ | _A/Oregon/22/2015_         | _Garten_Rebecca_ |
| 5792 | 2015-10-09 | _EPI_ISL_202388_ | _A/Oklahoma/20/2015_       | _Garten_Rebecca_ |
| 5793 | 2015-10-09 | _EPI_ISL_202416_ | _A/Alberta/RV2383/2015_    | _Garten_Rebecca_ |
| 5794 | 2015-10-09 | _EPI_ISL_202854_ | _A/Georgia/13/2015_        | _Garten_Rebecca_ |
| 5795 | 2015-10-09 | _EPI_ISL_202908_ | _A/Hawaii/71/2015_         | _Garten_Rebecca_ |
| 5796 | 2015-10-09 | _EPI_ISL_202921_ | _A/Hawaii/74/2015_         | _Garten_Rebecca_ |
| 5797 | 2015-10-09 | _EPI_ISL_203410_ | _A/Hong_Kong/15590/2015_   | _Garten_Rebecca_ |
| 5798 | 2015-10-09 | _EPI_ISL_205608_ | _A/Alberta/RV2383/2015_    | _Garten_Rebecca_ |
| 5799 | 2015-10-09 | _EPI_ISL_205646_ | _A/Hong_Kong/15590/2015_   | _Garten_Rebecca_ |
| 5800 | 2015-10-09 | _EPI_ISL_205649_ | _A/Washington/51/2015_     | _Garten_Rebecca_ |
| 5801 | 2015-10-10 | _EPI_ISL_201102_ | _A/Malmoe/5/2015_          | _Brytting_Maria_ |
| 5802 | 2015-10-10 | _EPI_ISL_201317_ | _A/New_Hampshire/41/2015_  | _Garten_Rebecca_ |
| 5803 | 2015-10-10 | _EPI_ISL_202097_ | _A/Massachusetts/28/2015_  | _Garten_Rebecca_ |
| 5804 | 2015-10-10 | _EPI_ISL_202406_ | _A/Alberta/RV2387/2015_    | _Garten_Rebecca_ |

|                 |                  |                            |                  |
|-----------------|------------------|----------------------------|------------------|
| 5805 2015-10-10 | _EPI_ISL_202409_ | _A/Alberta/RV2386/2015_    | _Garten_Rebecca_ |
| 5806 2015-10-10 | _EPI_ISL_202410_ | _A/Alberta/RV2385/2015_    | _Garten_Rebecca_ |
| 5807 2015-10-10 | _EPI_ISL_202944_ | _A/Michigan/67/2015_       | _Garten_Rebecca_ |
| 5808 2015-10-10 | _EPI_ISL_205279_ | _A/Michigan/67/2015_       | _Garten_Rebecca_ |
| 5809 2015-10-10 | _EPI_ISL_205609_ | _A/Alberta/RV2385/2015_    | _Garten_Rebecca_ |
| 5810 2015-10-10 | _EPI_ISL_205610_ | _A/Alberta/RV2386/2015_    | _Garten_Rebecca_ |
| 5811 2015-10-10 | _EPI_ISL_205611_ | _A/Alberta/RV2387/2015_    | _Garten_Rebecca_ |
| 5812 2015-10-11 | _EPI_ISL_202103_ | _A/Washington/50/2015_     | _Garten_Rebecca_ |
| 5813 2015-10-11 | _EPI_ISL_202405_ | _A/Alaska/257/2015_        | _Garten_Rebecca_ |
| 5814 2015-10-11 | _EPI_ISL_202909_ | _A/Colorado/15/2015_       | _Garten_Rebecca_ |
| 5815 2015-10-12 | _EPI_ISL_201278_ | _A/Maine/41/2015_          | _Garten_Rebecca_ |
| 5816 2015-10-12 | _EPI_ISL_201283_ | _A/Montana/32/2015_        | _Garten_Rebecca_ |
| 5817 2015-10-12 | _EPI_ISL_201291_ | _A/Oregon/23/2015_         | _Garten_Rebecca_ |
| 5818 2015-10-12 | _EPI_ISL_201292_ | _A/Oregon/24/2015_         | _Garten_Rebecca_ |
| 5819 2015-10-12 | _EPI_ISL_202092_ | _A/Arkansas/09/2015_       | _Garten_Rebecca_ |
| 5820 2015-10-12 | _EPI_ISL_202093_ | _A/Arkansas/08/2015_       | _Garten_Rebecca_ |
| 5821 2015-10-12 | _EPI_ISL_202403_ | _A/Alaska/258/2015_        | _Garten_Rebecca_ |
| 5822 2015-10-12 | _EPI_ISL_202920_ | _A/Hawaii/73/2015_         | _Garten_Rebecca_ |
| 5823 2015-10-12 | _EPI_ISL_203422_ | _A/New_York/69/2015_       | _Garten_Rebecca_ |
| 5824 2015-10-13 | _EPI_ISL_202822_ | _A/South_Dakota/39/2015_   | _Garten_Rebecca_ |
| 5825 2015-10-14 | _EPI_ISL_202088_ | _A/Iowa/50/2015_           | _Garten_Rebecca_ |
| 5826 2015-10-14 | _EPI_ISL_202091_ | _A/Delaware/41/2015_       | _Garten_Rebecca_ |
| 5827 2015-10-14 | _EPI_ISL_203411_ | _A/Hong_Kong/15607/2015_   | _Garten_Rebecca_ |
| 5828 2015-10-15 | _EPI_ISL_202096_ | _A/Maine/42/2015_          | _Garten_Rebecca_ |
| 5829 2015-10-15 | _EPI_ISL_202943_ | _A/Michigan/66/2015_       | _Garten_Rebecca_ |
| 5830 2015-10-16 | _EPI_ISL_202094_ | _A/North_Carolina/33/2015_ | _Garten_Rebecca_ |
| 5831 2015-10-16 | _EPI_ISL_202102_ | _A/Wisconsin/85/2015_      | _Garten_Rebecca_ |
| 5832 2015-10-17 | _EPI_ISL_202914_ | _A/Washington/53/2015_     | _Garten_Rebecca_ |
| 5833 2015-10-17 | _EPI_ISL_202915_ | _A/Washington/54/2015_     | _Garten_Rebecca_ |
| 5834 2015-10-17 | _EPI_ISL_202922_ | _A/Hawaii/75/2015_         | _Garten_Rebecca_ |
| 5835 2015-10-17 | _EPI_ISL_203412_ | _A/Hong_Kong/15609/2015_   | _Garten_Rebecca_ |
| 5836 2015-10-17 | _EPI_ISL_205647_ | _A/Hong_Kong/15609/2015_   | _Garten_Rebecca_ |
| 5837 2015-10-18 | _EPI_ISL_203559_ | _A/Arizona/27/2015_        | _Garten_Rebecca_ |
| 5838 2015-10-18 | _EPI_ISL_203560_ | _A/California/107/2015_    | _Garten_Rebecca_ |
| 5839 2015-10-18 | _EPI_ISL_205663_ | _A/Hawaii/76/2015_         | _Garten_Rebecca_ |
| 5840 2015-10-19 | _EPI_ISL_202095_ | _A/Maine/43/2015_          | _Garten_Rebecca_ |
| 5841 2015-10-19 | _EPI_ISL_202105_ | _A/Pennsylvania/42/2015_   | _Garten_Rebecca_ |
| 5842 2015-10-19 | _EPI_ISL_202431_ | _A/Wisconsin/86/2015_      | _Garten_Rebecca_ |
| 5843 2015-10-19 | _EPI_ISL_202825_ | _A/Oregon/25/2015_         | _Garten_Rebecca_ |
| 5844 2015-10-19 | _EPI_ISL_202826_ | _A/Oregon/25/2015_         | _Garten_Rebecca_ |
| 5845 2015-10-19 | _EPI_ISL_202917_ | _A/West_Virginia/24/2015_  | _Garten_Rebecca_ |
| 5846 2015-10-19 | _EPI_ISL_202938_ | _A/California/98/2015_     | _Garten_Rebecca_ |
| 5847 2015-10-19 | _EPI_ISL_203569_ | _A/Wisconsin/86/2015_      | _Garten_Rebecca_ |
| 5848 2015-10-19 | _EPI_ISL_205648_ | _A/Hong_Kong/15611/2015_   | _Garten_Rebecca_ |
| 5849 2015-10-19 | _EPI_ISL_205658_ | _A/California/98/2015_     | _Garten_Rebecca_ |
| 5850 2015-10-20 | _EPI_ISL_202404_ | _A/Alaska/259/2015_        | _Garten_Rebecca_ |
| 5851 2015-10-20 | _EPI_ISL_202430_ | _A/Washington/56/2015_     | _Garten_Rebecca_ |
| 5852 2015-10-20 | _EPI_ISL_202855_ | _A/Florida/76/2015_        | _Garten_Rebecca_ |
| 5853 2015-10-20 | _EPI_ISL_202856_ | _A/Florida/76/2015_        | _Garten_Rebecca_ |
| 5854 2015-10-20 | _EPI_ISL_202935_ | _A/California/93/2015_     | _Garten_Rebecca_ |
| 5855 2015-10-20 | _EPI_ISL_202936_ | _A/California/94/2015_     | _Garten_Rebecca_ |
| 5856 2015-10-20 | _EPI_ISL_202937_ | _A/California/95/2015_     | _Garten_Rebecca_ |
| 5857 2015-10-20 | _EPI_ISL_205657_ | _A/California/94/2015_     | _Garten_Rebecca_ |
| 5858 2015-10-21 | _EPI_ISL_202417_ | _A/Colorado/16/2015_       | _Garten_Rebecca_ |
| 5859 2015-10-21 | _EPI_ISL_202860_ | _A/Iowa/44/2015_           | _Garten_Rebecca_ |
| 5860 2015-10-21 | _EPI_ISL_202861_ | _A/Iowa/44/2015_           | _Garten_Rebecca_ |
| 5861 2015-10-21 | _EPI_ISL_202864_ | _A/Iowa/46/2015_           | _Garten_Rebecca_ |
| 5862 2015-10-21 | _EPI_ISL_202865_ | _A/Iowa/46/2015_           | _Garten_Rebecca_ |
| 5863 2015-10-21 | _EPI_ISL_203407_ | _A/California/96/2015_     | _Garten_Rebecca_ |
| 5864 2015-10-21 | _EPI_ISL_203452_ | _A/Washington/59/2015_     | _Garten_Rebecca_ |
| 5865 2015-10-22 | _EPI_ISL_202859_ | _A/Florida/78/2015_        | _Garten_Rebecca_ |
| 5866 2015-10-22 | _EPI_ISL_202862_ | _A/Iowa/45/2015_           | _Garten_Rebecca_ |
| 5867 2015-10-22 | _EPI_ISL_202863_ | _A/Iowa/45/2015_           | _Garten_Rebecca_ |
| 5868 2015-10-22 | _EPI_ISL_202866_ | _A/Iowa/47/2015_           | _Garten_Rebecca_ |
| 5869 2015-10-22 | _EPI_ISL_202910_ | _A/Alaska/260/2015_        | _Garten_Rebecca_ |
| 5870 2015-10-22 | _EPI_ISL_205634_ | _A/Pennsylvania/40/2015_   | _Garten_Rebecca_ |
| 5871 2015-10-23 | _EPI_ISL_202827_ | _A/Oregon/27/2015_         | _Garten_Rebecca_ |
| 5872 2015-10-23 | _EPI_ISL_205651_ | _A/Nebraska/19/2015_       | _Garten_Rebecca_ |
| 5873 2015-10-24 | _EPI_ISL_202857_ | _A/Florida/77/2015_        | _Garten_Rebecca_ |
| 5874 2015-10-24 | _EPI_ISL_202858_ | _A/Florida/77/2015_        | _Garten_Rebecca_ |
| 5875 2015-10-24 | _EPI_ISL_202867_ | _A/Iowa/48/2015_           | _Garten_Rebecca_ |
| 5876 2015-10-24 | _EPI_ISL_202868_ | _A/Iowa/49/2015_           | _Garten_Rebecca_ |
| 5877 2015-10-24 | _EPI_ISL_203408_ | _A/California/97/2015_     | _Garten_Rebecca_ |
| 5878 2015-10-25 | _EPI_ISL_202912_ | _A/Alaska/262/2015_        | _Garten_Rebecca_ |
| 5879 2015-10-25 | _EPI_ISL_202913_ | _A/Alaska/262/2015_        | _Garten_Rebecca_ |
| 5880 2015-10-26 | _EPI_ISL_202911_ | _A/Alaska/261/2015_        | _Garten_Rebecca_ |
| 5881 2015-10-26 | _EPI_ISL_202923_ | _A/Florida/82/2015_        | _Garten_Rebecca_ |
| 5882 2015-10-26 | _EPI_ISL_202924_ | _A/Florida/82/2015_        | _Garten_Rebecca_ |
| 5883 2015-10-26 | _EPI_ISL_203409_ | _A/Florida/79/2015_        | _Garten_Rebecca_ |
| 5884 2015-10-26 | _EPI_ISL_203556_ | _A/Arizona/23/2015_        | _Garten_Rebecca_ |
| 5885 2015-10-27 | _EPI_ISL_202933_ | _A/South_Carolina/11/2015_ | _Garten_Rebecca_ |
| 5886 2015-10-28 | _EPI_ISL_202419_ | _A/Florida/80/2015_        | _Garten_Rebecca_ |
| 5887 2015-10-28 | _EPI_ISL_203580_ | _A/Florida/80/2015_        | _Garten_Rebecca_ |
| 5888 2015-10-29 | _EPI_ISL_202425_ | _A/Maryland/18/2015_       | _Garten_Rebecca_ |
| 5889 2015-10-29 | _EPI_ISL_202925_ | _A/Wisconsin/87/2015_      | _Garten_Rebecca_ |
| 5890 2015-10-30 | _EPI_ISL_202344_ | _A/Stockholm/54/2015_      | _Brytting_Maria_ |
| 5891 2015-10-30 | _EPI_ISL_205790_ | _A/Uppsala/7/2015_         | _Brytting_Maria_ |
| 5892 2015-11-01 | _EPI_ISL_202426_ | _A/Maryland/19/2015_       | _Garten_Rebecca_ |
| 5893 2015-11-01 | _EPI_ISL_203414_ | _A/Iowa/54/2015_           | _Garten_Rebecca_ |
| 5894 2015-11-01 | _EPI_ISL_205628_ | _A/Washington/61/2015_     | _Garten_Rebecca_ |
| 5895 2015-11-02 | _EPI_ISL_202926_ | _A/Louisiana/06/2015_      | _Garten_Rebecca_ |
| 5896 2015-11-02 | _EPI_ISL_202927_ | _A/Florida/85/2015_        | _Garten_Rebecca_ |
| 5897 2015-11-02 | _EPI_ISL_202928_ | _A/Florida/86/2015_        | _Garten_Rebecca_ |
| 5898 2015-11-02 | _EPI_ISL_203557_ | _A/Arizona/24/2015_        | _Garten_Rebecca_ |
| 5899 2015-11-02 | _EPI_ISL_203558_ | _A/Arizona/25/2015_        | _Garten_Rebecca_ |
| 5900 2015-11-02 | _EPI_ISL_203565_ | _A/Hawaii/77/2015_         | _Garten_Rebecca_ |
| 5901 2015-11-02 | _EPI_ISL_205652_ | _A/Florida/86/2015_        | _Garten_Rebecca_ |
| 5902 2015-11-03 | _EPI_ISL_202823_ | _A/New_York/71/2015_       | _Garten_Rebecca_ |
| 5903 2015-11-03 | _EPI_ISL_202934_ | _A/Wyoming/19/2015_        | _Garten_Rebecca_ |
| 5904 2015-11-03 | _EPI_ISL_205665_ | _A/California/106/2015_    | _Garten_Rebecca_ |
| 5905 2015-11-04 | _EPI_ISL_205664_ | _A/California/101/2015_    | _Garten_Rebecca_ |
| 5906 2015-11-06 | _EPI_ISL_202824_ | _A/Florida/84/2015_        | _Garten_Rebecca_ |
| 5907 2015-11-07 | _EPI_ISL_202939_ | _A/Washington/57/2015_     | _Garten_Rebecca_ |
| 5908 2015-11-07 | _EPI_ISL_202940_ | _A/Washington/57/2015_     | _Garten_Rebecca_ |
| 5909 2015-11-08 | _EPI_ISL_202929_ | _A/Florida/87/2015_        | _Garten_Rebecca_ |
| 5910 2015-11-08 | _EPI_ISL_203568_ | _A/Texas/72/2015_          | _Garten_Rebecca_ |
| 5911 2015-11-09 | _EPI_ISL_202942_ | _A/Washington/58/2015_     | _Garten_Rebecca_ |
| 5912 2015-11-11 | _EPI_ISL_202424_ | _A/Texas/71/2015_          | _Garten_Rebecca_ |
| 5913 2015-11-11 | _EPI_ISL_202428_ | _A/Louisiana/07/2015_      | _Garten_Rebecca_ |
| 5914 2015-11-11 | _EPI_ISL_205659_ | _A/Texas/71/2015_          | _Garten_Rebecca_ |
| 5915 2015-11-15 | _EPI_ISL_205653_ | _A/Colorado/19/2015_       | _Garten_Rebecca_ |
| 5916 2015-11-15 | _EPI_ISL_205766_ | _A/Halmstad/1/2015_        | _Brytting_Maria_ |
| 5917 2015-11-16 | _EPI_ISL_202930_ | _A/Minnesota/47/2015_      | _Garten_Rebecca_ |
| 5918 2015-11-16 | _EPI_ISL_203385_ | _A/England/54760378/2015_  | _Galiano_Monica_ |
| 5919 2015-11-16 | _EPI_ISL_205770_ | _A/Lund/2/2015_            | _Brytting_Maria_ |
| 5920 2015-11-17 | _EPI_ISL_203563_ | _A/Colorado/24/2015_       | _Garten_Rebecca_ |
| 5921 2015-11-17 | _EPI_ISL_205656_ | _A/Colorado/24/2015_       | _Garten_Rebecca_ |
| 5922 2015-11-17 | _EPI_ISL_205767_ | _A/Skovde/5/2015_          | _Brytting_Maria_ |
| 5923 2015-11-17 | _EPI_ISL_205772_ | _A/Stockholm/58/2015_      | _Brytting_Maria_ |
| 5924 2015-11-18 | _EPI_ISL_203423_ | _A/Oklahoma/21/2015_       | _Garten_Rebecca_ |
| 5925 2015-11-18 | _EPI_ISL_205672_ | _A/California/112/2015_    | _Garten_Rebecca_ |

|                  |                                           |                  |
|------------------|-------------------------------------------|------------------|
| 5926 2015-11-19_ | _EPI_ISL_203561_ _A/Colorado/21/2015_     | _Garten_Rebecca_ |
| 5927 2015-11-19_ | _EPI_ISL_205654_ _A/Colorado/21/2015_     | _Garten_Rebecca_ |
| 5928 2015-11-20_ | _EPI_ISL_205826_ _A/Stockholm/65/2015_    | _Brytting_Maria_ |
| 5929 2015-11-21_ | _EPI_ISL_205781_ _A/Göthenburg/1/2015_    | _Brytting_Maria_ |
| 5930 2015-11-21_ | _EPI_ISL_205783_ _A/Stockholm/64/2015_    | _Brytting_Maria_ |
| 5931 2015-11-22_ | _EPI_ISL_203562_ _A/Colorado/23/2015_     | _Garten_Rebecca_ |
| 5932 2015-11-23_ | _EPI_ISL_205668_ _A/Pennsylvania/50/2015_ | _Garten_Rebecca_ |
| 5933 2015-11-23_ | _EPI_ISL_205778_ _A/Stockholm/61/2015_    | _Brytting_Maria_ |
| 5934 2015-11-23_ | _EPI_ISL_205782_ _A/Stockholm/63/2015_    | _Brytting_Maria_ |
| 5935 2015-11-26_ | _EPI_ISL_205674_ _A/Alaska/266/2015_      | _Garten_Rebecca_ |
| 5936 2015-11-27_ | _EPI_ISL_205675_ _A/Alaska/267/2015_      | _Garten_Rebecca_ |
| 5937 2015-11-28_ | _EPI_ISL_205673_ _A/California/113/2015_  | _Garten_Rebecca_ |
| 5938 2015-12-03_ | _EPI_ISL_205661_ _A/Washington/62/2015_   | _Garten_Rebecca_ |
| 5939 2015-12-03_ | _EPI_ISL_205784_ _A/Kungälv/1/2015_       | _Brytting_Maria_ |
| 5940 2015-12-04_ | _EPI_ISL_205671_ _A/Florida/93/2015_      | _Garten_Rebecca_ |
| 5941 2015-12-08_ | _EPI_ISL_205662_ _A/Texas/75/2015_        | _Garten_Rebecca_ |
| 5942 2015-12-08_ | _EPI_ISL_205670_ _A/Colorado/27/2015_     | _Garten_Rebecca_ |

[illegible]

\_\_\_\_\_

[illegible]

\_\_\_\_\_

Iowa State Hygienic Laboratory  
Iowa State Hygienic Laboratory

[illegible]

\_\_\_\_\_

[illegible]

\_\_\_\_\_

[illegible]

\_\_\_\_\_

[illegible]

\_\_\_\_\_

[illegible]

[illegible]

\_\_\_\_\_

[illegible]

\_\_\_\_\_

[illegible]

\_\_\_\_\_

[illegible]

[illegible]





















[illegible]





[illegible]



|                                                                                                              |                                                                                          |
|--------------------------------------------------------------------------------------------------------------|------------------------------------------------------------------------------------------|
| _LACEN/RS_-_Laborat?rio_Central_de_Sa?de_P?blica_do_Rio_Grande_do_Sul_                                       | _Oswaldo_Cruz_Institute_-_FIOCRUZ_-_Laboratory_of_Respiratory_Viruses_and_Measles_(LVRS) |
| _LACEN/RS_-_Laborat?rio_Central_de_Sa?de_P?blica_do_Rio_Grande_do_Sul_                                       | _Oswaldo_Cruz_Institute_-_FIOCRUZ_-_Laboratory_of_Respiratory_Viruses_and_Measles_(LVRS) |
| _New_York_State_Department_of_Health_                                                                        | _Centers_for_Disease_Control_and_Prevention                                              |
| _New_York_State_Department_of_Health_                                                                        | _Centers_for_Disease_Control_and_Prevention                                              |
| __                                                                                                           | _Niigata_University                                                                      |
| __                                                                                                           | _Niigata_University                                                                      |
| __                                                                                                           | _Swedish_Institute_for_Infectious_Disease_Control                                        |
| __                                                                                                           | _Other_Database_Import                                                                   |
| __                                                                                                           | _Swedish_Institute_for_Infectious_Disease_Control                                        |
| __                                                                                                           | _Swedish_Institute_for_Infectious_Disease_Control                                        |
| __                                                                                                           | _Swedish_Institute_for_Infectious_Disease_Control                                        |
| _National_Institute_for_Medical_Research_                                                                    | _Centers_for_Disease_Control_and_Prevention                                              |
| _National_Institute_for_Medical_Research_                                                                    | _Centers_for_Disease_Control_and_Prevention                                              |
| __                                                                                                           | _Niigata_University                                                                      |
| __                                                                                                           | _Swedish_Institute_for_Infectious_Disease_Control                                        |
| _Laboratorio_de_Virus_Respiratorio_                                                                          | _Centers_for_Disease_Control_and_Prevention                                              |
| __                                                                                                           | _Other_Database_Import                                                                   |
| _Instituto_Adolfo_Lutz_                                                                                      | _Centers_for_Disease_Control_and_Prevention                                              |
| _Instituto_Adolfo_Lutz_                                                                                      | _Centers_for_Disease_Control_and_Prevention                                              |
| __                                                                                                           | _Niigata_University                                                                      |
| __                                                                                                           | _Swedish_Institute_for_Infectious_Disease_Control                                        |
| _Crick_Worldwide_Influenza_Centre_                                                                           | _Centers_for_Disease_Control_and_Prevention                                              |
| _Instituto_Adolfo_Lutz_                                                                                      | _Centers_for_Disease_Control_and_Prevention                                              |
| __                                                                                                           | _Niigata_University                                                                      |
| __                                                                                                           | _Other_Database_Import                                                                   |
| _Nebraska_Public_Health_Lab_                                                                                 | _Centers_for_Disease_Control_and_Prevention                                              |
| _Nebraska_Public_Health_Lab_                                                                                 | _Centers_for_Disease_Control_and_Prevention                                              |
| _Laborat?rio_Central_do_Estado_do_Paran?_-_LACEN/PR_                                                         | _Oswaldo_Cruz_Institute_-_FIOCRUZ_-_Laboratory_of_Respiratory_Viruses_and_Measles_(LVRS) |
| _State_of_Hawaii_Department_of_Health_                                                                       | _Centers_for_Disease_Control_and_Prevention                                              |
| _State_of_Hawaii_Department_of_Health_                                                                       | _Centers_for_Disease_Control_and_Prevention                                              |
| _State_of_Hawaii_Department_of_Health_                                                                       | _Centers_for_Disease_Control_and_Prevention                                              |
| __                                                                                                           | _Niigata_University                                                                      |
| __                                                                                                           | _Other_Database_Import                                                                   |
| _North_Carolina_State_Laboratory_of_Public_Health_                                                           | _Swedish_Institute_for_Infectious_Disease_Control                                        |
| _Uganda_Virus_Research_Institute_(UVRI),_National_Influenza_Center_                                          | _Centers_for_Disease_Control_and_Prevention                                              |
| _Institute_of_Environmental_Science_and_Research_                                                            | _Centers_for_Disease_Control_and_Prevention                                              |
| _National_Influenza_Reference_Laboratory_                                                                    | _WHO_Collaborating_Centre_for_Reference_and_Research_on_Influenza                        |
| _National_Institute_for_Medical_Research_                                                                    | _Centers_for_Disease_Control_and_Prevention                                              |
| _Maryland_Department_of_Health_and_Mental_Hygiene_                                                           | _Centers_for_Disease_Control_and_Prevention                                              |
| _Maryland_Department_of_Health_and_Mental_Hygiene_                                                           | _Centers_for_Disease_Control_and_Prevention                                              |
| _Instituto_Adolfo_Lutz_                                                                                      | _Centers_for_Disease_Control_and_Prevention                                              |
| _National_Influenza_Reference_Laboratory_                                                                    | _Centers_for_Disease_Control_and_Prevention                                              |
| _Laboratorio_de_Investigacion_/Centro_de_Educacion_Medica_y_Amistad_Dominico_Japones_(CEMADOJA)_             | _Centers_for_Disease_Control_and_Prevention                                              |
| _Uganda_Virus_Research_Institute_(UVRI),_National_Influenza_Center_                                          | _Centers_for_Disease_Control_and_Prevention                                              |
| _Laboratorio_de_Investigacion_/Centro_de_Educacion_Medica_y_Amistad_Dominico_Japones_(CEMADOJA)_             | _Centers_for_Disease_Control_and_Prevention                                              |
| _Alaska_State_Virology_Lab_                                                                                  | _Centers_for_Disease_Control_and_Prevention                                              |
| _National_Influenza_Reference_Laboratory_                                                                    | _Centers_for_Disease_Control_and_Prevention                                              |
| _Instituto_Adolfo_Lutz_                                                                                      | _Centers_for_Disease_Control_and_Prevention                                              |
| _Institute_of_Epidemiology_Disease_Control_and_Research_(IEDCR)&_Bangladesh_National_Influenza_Centre_(NIC)_ | _Centers_for_Disease_Control_and_Prevention                                              |
| _Texas_Department_of_State_Health_Services-Laboratory_Services_                                              | _Centers_for_Disease_Control_and_Prevention                                              |
| _National_Influenza_Reference_Laboratory_                                                                    | _Centers_for_Disease_Control_and_Prevention                                              |
| _WHO_Collaborating_Centre_for_Reference_and_Research_on_Influenza_                                           | _Centers_for_Disease_Control_and_Prevention                                              |
| __                                                                                                           | _Other_Database_Import                                                                   |
| _CENETROP_                                                                                                   | _Centers_for_Disease_Control_and_Prevention                                              |
| _CENETROP_                                                                                                   | _Centers_for_Disease_Control_and_Prevention                                              |
| _CENETROP_                                                                                                   | _Centers_for_Disease_Control_and_Prevention                                              |
| __                                                                                                           | _Niigata_University                                                                      |
| _Laboratorio_de_Virologia_Direccion_de_Microbiologia_                                                        | _Centers_for_Disease_Control_and_Prevention                                              |
| _WHO_Collaborating_Centre_for_Reference_and_Research_on_Influenza_                                           | _Centers_for_Disease_Control_and_Prevention                                              |
| _WHO_Collaborating_Centre_for_Reference_and_Research_on_Influenza_                                           | _Centers_for_Disease_Control_and_Prevention                                              |
| _WHO_Collaborating_Centre_for_Reference_and_Research_on_Influenza_                                           | _Centers_for_Disease_Control_and_Prevention                                              |
| _CEMIC_University_Hospital_                                                                                  | _Centers_for_Disease_Control_and_Prevention                                              |
| __                                                                                                           | _Niigata_University                                                                      |
| _Central_Laboratory_of_Public_Health_                                                                        | _Centers_for_Disease_Control_and_Prevention                                              |
| _CEMIC_University_Hospital_                                                                                  | _Centers_for_Disease_Control_and_Prevention                                              |
| __                                                                                                           | _Niigata_University                                                                      |
| _Instituto_Adolfo_Lutz_                                                                                      | _Centers_for_Disease_Control_and_Prevention                                              |
| _Instituto_Adolfo_Lutz_                                                                                      | _Centers_for_Disease_Control_and_Prevention                                              |
| __                                                                                                           | _Niigata_University                                                                      |
| _Laboratorio_Nacional_de_Influenza_                                                                          | _Centers_for_Disease_Control_and_Prevention                                              |
| __                                                                                                           | _Other_Database_Import                                                                   |
| __                                                                                                           | _Other_Database_Import                                                                   |
| __                                                                                                           | _Niigata_University                                                                      |
| _Central_Laboratory_of_Public_Health_                                                                        | _Centers_for_Disease_Control_and_Prevention                                              |
| _CEMIC_University_Hospital_                                                                                  | _Centers_for_Disease_Control_and_Prevention                                              |
| _State_of_Hawaii_Department_of_Health_                                                                       | _Centers_for_Disease_Control_and_Prevention                                              |
| _State_of_Hawaii_Department_of_Health_                                                                       | _Centers_for_Disease_Control_and_Prevention                                              |
| _WHO_National_Influenza_Centre,_National_Institute_of_Medical_Research_(NIMR)_                               | _Centers_for_Disease_Control_and_Prevention                                              |
| _State_of_Hawaii_Department_of_Health_                                                                       | _Centers_for_Disease_Control_and_Prevention                                              |
| _Instituto_Adolfo_Lutz_                                                                                      | _Centers_for_Disease_Control_and_Prevention                                              |
| __                                                                                                           | _Swedish_Institute_for_Infectious_Disease_Control                                        |
| _State_of_Hawaii_Department_of_Health_                                                                       | _Centers_for_Disease_Control_and_Prevention                                              |
| __                                                                                                           | _Niigata_University                                                                      |
| __                                                                                                           | _WHO_Collaborating_Centre_for_Reference_and_Research_on_Influenza                        |
| _Canberra_Hospital_                                                                                          | _Centers_for_Disease_Control_and_Prevention                                              |
| _WHO_Collaborating_Centre_for_Reference_and_Research_on_Influenza_                                           | _Centers_for_Disease_Control_and_Prevention                                              |
| _Central_Laboratory_of_Public_Health_                                                                        | _Centers_for_Disease_Control_and_Prevention                                              |
| _WHO_Chinese_National_Influenza_Center_                                                                      | _Centers_for_Disease_Control_and_Prevention                                              |
| _Instituto_Nacional_de_Higiene_"Rafael_Rangel"_                                                              | _Centers_for_Disease_Control_and_Prevention                                              |
| __                                                                                                           | _Niigata_University                                                                      |
| __                                                                                                           | _Other_Database_Import                                                                   |
| _Wisconsin_State_Laboratory_of_Hygiene_                                                                      | _Centers_for_Disease_Control_and_Prevention                                              |
| _John_Hunter_Hospital_                                                                                       | _WHO_Collaborating_Centre_for_Reference_and_Research_on_Influenza                        |
| _National_Public_Health_Laboratory_                                                                          | _Centers_for_Disease_Control_and_Prevention                                              |
| __                                                                                                           | _Other_Database_Import                                                                   |
| _National_Center_for_Laboratory_and_Epidemiology_                                                            | _Centers_for_Disease_Control_and_Prevention                                              |
| _California_Department_of_Health_Services_                                                                   | _Centers_for_Disease_Control_and_Prevention                                              |
| _State_of_Hawaii_Department_of_Health_                                                                       | _Centers_for_Disease_Control_and_Prevention                                              |
| _State_of_Hawaii_Department_of_Health_                                                                       | _Centers_for_Disease_Control_and_Prevention                                              |
| _State_of_Hawaii_Department_of_Health_                                                                       | _Centers_for_Disease_Control_and_Prevention                                              |
| _California_Department_of_Health_Services_                                                                   | _Centers_for_Disease_Control_and_Prevention                                              |
| _State_of_Hawaii_Department_of_Health_                                                                       | _Centers_for_Disease_Control_and_Prevention                                              |
| _WHO_Collaborating_Centre_for_Reference_and_Research_on_Influenza_                                           | _Centers_for_Disease_Control_and_Prevention                                              |
| _Michigan_Department_of_Community_Health_                                                                    | _Centers_for_Disease_Control_and_Prevention                                              |
| _National_Institute_of_Hygiene_and_Epidemiology_                                                             | _Centers_for_Disease_Control_and_Prevention                                              |
| __                                                                                                           | _Swedish_Institute_for_Infectious_Disease_Control                                        |
| _National_Center_for_Laboratory_and_Epidemiology_                                                            | _Centers_for_Disease_Control_and_Prevention                                              |
| _CDC-Kenya_                                                                                                  | _Centers_for_Disease_Control_and_Prevention                                              |
| _Texas_Department_of_State_Health_Services-Laboratory_Services_                                              | _Centers_for_Disease_Control_and_Prevention                                              |
| _CDC-Kenya_                                                                                                  | _Centers_for_Disease_Control_and_Prevention                                              |
| __                                                                                                           | _Niigata_University                                                                      |
| _Microbiology_Services_Colindale_Public_Health_England_                                                      | _Microbiology_Services_Colindale_Public_Health_England                                   |
| _California_Department_of_Health_Services_                                                                   | _Centers_for_Disease_Control_and_Prevention                                              |
| _California_Department_of_Health_Services_                                                                   | _Centers_for_Disease_Control_and_Prevention                                              |
| _National_Center_for_Laboratory_and_Epidemiology_                                                            | _Centers_for_Disease_Control_and_Prevention                                              |
| _CDC-Kenya_                                                                                                  | _Centers_for_Disease_Control_and_Prevention                                              |
| _WHO_Collaborating_Centre_for_Reference_and_Research_on_Influenza_                                           | _Centers_for_Disease_Control_and_Prevention                                              |
| _National_Center_for_Laboratory_and_Epidemiology_                                                            | _Centers_for_Disease_Control_and_Prevention                                              |
| _National_Center_for_Laboratory_and_Epidemiology_                                                            | _Centers_for_Disease_Control_and_Prevention                                              |

CDC-Kenya\_  
 Maryland\_Department\_of\_Health\_and\_Mental\_Hygiene\_  
 CDC-Kenya\_  
 CDC-Kenya\_  
 CDC-Kenya\_  
 Microbiology\_Services\_Colindale\_Public\_Health\_England\_  
 New\_Hampshire\_Public\_Health\_Laboratories\_  
 Central\_Laboratory\_of\_Public\_Health\_  
 Michigan\_Department\_of\_Community\_Health\_  
 Alaska\_State\_Virology\_Lab\_  
 California\_Department\_of\_Health\_Services\_  
 Ethiopian\_Health\_and\_Nutrition\_Research\_Institute\_(EHNRI)\_  
 State\_of\_Hawaii\_Department\_of\_Health\_  
 North\_Carolina\_State\_Laboratory\_of\_Public\_Health\_  
 Alaska\_State\_Virology\_Lab\_  
 National\_Center\_for\_Laboratory\_and\_Epidemiology\_  
 Shimane\_Prefectural\_Institute\_of\_Public\_Health\_and\_Environmental\_Science\_  
 North\_Carolina\_State\_Laboratory\_of\_Public\_Health\_  
 Michigan\_Department\_of\_Community\_Health\_  
 Saitama\_Institute\_of\_Public\_Health\_  
 Microbiology\_Services\_Colindale\_Public\_Health\_England\_  
 Michigan\_Department\_of\_Community\_Health\_  
 Pennsylvania\_Department\_of\_Health\_  
 Pennsylvania\_Department\_of\_Health\_  
 Michigan\_Department\_of\_Community\_Health\_  
 New\_Jersey\_Department\_of\_Health\_&\_Senior\_Services\_  
 Maryland\_Department\_of\_Health\_and\_Mental\_Hygiene\_  
 Maryland\_Department\_of\_Health\_and\_Mental\_Hygiene\_  
 Estado\_de\_Salud\_Publica\_de\_Chile\_  
 Minnesota\_Department\_of\_Health\_  
 Maryland\_Department\_of\_Health\_and\_Mental\_Hygiene\_  
 Minnesota\_Department\_of\_Health\_  
 Arkansas\_Department\_of\_Health\_  
 Arkansas\_Department\_of\_Health\_  
 Michigan\_Department\_of\_Community\_Health\_  
 New\_Mexico\_Department\_of\_Health\_  
 New\_Mexico\_Department\_of\_Health\_  
 New\_York\_State\_Department\_of\_Health\_  
 Michigan\_Department\_of\_Community\_Health\_  
 Pennsylvania\_Department\_of\_Health\_  
 Victorian\_Infectious\_Diseases\_Reference\_Laboratory\_  
 Minnesota\_Department\_of\_Health\_  
 Minnesota\_Department\_of\_Health\_  
 Texas\_Department\_of\_State\_Health\_Services-Laboratory\_Services\_  
 Arkansas\_Department\_of\_Health\_  
 Microbiology\_Services\_Colindale\_Public\_Health\_England\_  
 Florida\_Department\_of\_Health-Tampa\_  
 Florida\_Department\_of\_Health-Tampa\_  
 Florida\_Department\_of\_Health-Tampa\_  
 New\_York\_State\_Department\_of\_Health\_  
 Michigan\_Department\_of\_Community\_Health\_  
 Arkansas\_Department\_of\_Health\_  
 Arkansas\_Department\_of\_Health\_  
 Pennsylvania\_Department\_of\_Health\_  
 Michigan\_Department\_of\_Community\_Health\_  
 North\_Carolina\_State\_Laboratory\_of\_Public\_Health\_  
 Microbiology\_Services\_Colindale\_Public\_Health\_England\_  
 Wisconsin\_State\_Laboratory\_of\_Hygiene\_  
 Pennsylvania\_Department\_of\_Health\_  
 Wisconsin\_State\_Laboratory\_of\_Hygiene\_  
 New\_York\_State\_Department\_of\_Health\_  
 Microbiology\_Services\_Colindale\_Public\_Health\_England\_  
 Pennsylvania\_Department\_of\_Health\_  
 New\_Hampshire\_Public\_Health\_Laboratories\_  
 Arkansas\_Department\_of\_Health\_  
 Florida\_Department\_of\_Health-Jacksonville\_  
 Wisconsin\_State\_Laboratory\_of\_Hygiene\_  
 Ohio\_Department\_of\_Health\_Laboratories\_  
 Texas\_Department\_of\_State\_Health\_Services-Laboratory\_Services\_  
 Texas\_Department\_of\_State\_Health\_Services-Laboratory\_Services\_  
 Arkansas\_Department\_of\_Health\_  
 North\_Dakota\_Department\_of\_Health\_  
 Texas\_Department\_of\_State\_Health\_Services-Laboratory\_Services\_  
 Microbiology\_Services\_Colindale\_Public\_Health\_England\_  
 Microbiology\_Services\_Colindale\_Public\_Health\_England\_  
 Microbiology\_Services\_Colindale\_Public\_Health\_England\_  
 Microbiology\_Services\_Colindale\_Public\_Health\_England\_  
 Microbiology\_Services\_Colindale\_Public\_Health\_England\_  
 Microbiology\_Services\_Colindale\_Public\_Health\_England\_  
 Florida\_Department\_of\_Health-Jacksonville\_  
 Connecticut\_Department\_of\_Public\_Health\_  
 Colorado\_Department\_of\_Health\_Lab\_  
 Kentucky\_Division\_of\_Laboratory\_Services\_  
 Colorado\_Department\_of\_Health\_Lab\_  
 Colorado\_Department\_of\_Health\_Lab\_  
 Alaska\_State\_Virology\_Lab\_  
 National\_Microbiology\_Laboratory\_Health\_Canada\_  
 Oregon\_Public\_Health\_Laboratory\_  
 Alaska\_State\_Virology\_Lab\_  
 Texas\_Department\_of\_State\_Health\_Services-Laboratory\_Services\_  
 North\_Carolina\_State\_Laboratory\_of\_Public\_Health\_  
 North\_Carolina\_State\_Laboratory\_of\_Public\_Health\_  
 Washington\_State\_Public\_Health\_Laboratory\_  
 Mississippi\_Public\_Health\_Laboratory\_  
 North\_Carolina\_State\_Laboratory\_of\_Public\_Health\_  
 Florida\_Department\_of\_Health-Tampa\_  
 National\_Microbiology\_Laboratory\_Health\_Canada\_  
 Florida\_Department\_of\_Health-Jacksonville\_  
 Florida\_Department\_of\_Health-Jacksonville\_  
 Florida\_Department\_of\_Health-Jacksonville\_  
 Florida\_Department\_of\_Health-Jacksonville\_  
 Florida\_Department\_of\_Health-Jacksonville\_  
 Florida\_Department\_of\_Health-Jacksonville\_  
 Louisiana\_Department\_of\_Health\_and\_Hospitals\_  
 Florida\_Department\_of\_Health-Jacksonville\_  
 WHO\_Collaborating\_Centre\_for\_Reference\_and\_Research\_on\_Influenza\_  
 Wyoming\_Public\_Health\_Laboratory\_  
 Wyoming\_Public\_Health\_Laboratory\_  
 Maine\_Health\_and\_Environmental\_Testing\_Laboratory\_  
 Maine\_Health\_and\_Environmental\_Testing\_Laboratory\_  
 Wyoming\_Public\_Health\_Laboratory\_  
 Oregon\_Public\_Health\_Laboratory\_  
 Oregon\_Public\_Health\_Laboratory\_  
 Iowa\_State\_Hygienic\_Laboratory\_  
 Louisiana\_Department\_of\_Health\_and\_Hospitals\_

[illegible]



Texas, Department of State Health Services-Laboratory\_Services\_  
State of Hawaii Department of Health\_  
Illinois Department of Public Health-Chicago\_  
\_WHO\_Chinese\_National\_Influenza\_Center\_  
National\_Microbiology\_Laboratory\_Health\_Canada\_  
Illinois\_Department\_of\_Public\_Health-Chicago\_  
Mississippi\_Public\_Health\_Laboratory\_  
North\_Carolina\_State\_Laboratory\_of\_Public\_Health\_  
\_WHO\_Chinese\_National\_Influenza\_Center\_  
Laboratorio\_Nacional\_De\_Salud\_Guatemala\_  
  
Indiana\_State\_Department\_of\_Health\_Laboratories\_  
Mississippi\_Public\_Health\_Laboratory\_  
Utah\_Department\_of\_Health\_  
ADPH\_Bureau\_of\_Clinical\_Laboratories\_  
State\_of\_Utah\_Bureau\_of\_Laboratories\_  
Indiana\_State\_Department\_of\_Health\_Laboratories\_  
Houston\_Department\_of\_Health\_and\_Human\_Services\_  
ADPH\_Bureau\_of\_Clinical\_Laboratories\_  
ADPH\_Bureau\_of\_Clinical\_Laboratories\_  
Utah\_Department\_of\_Health\_  
Utah\_Department\_of\_Health\_  
  
Sendai\_City\_Institute\_of\_Public\_Health\_  
Utah\_Department\_of\_Health\_  
Indiana\_State\_Department\_of\_Health\_Laboratories\_  
Utah\_Department\_of\_Health\_  
Wyoming\_Public\_Health\_Laboratory\_  
Colorado\_Department\_of\_Health\_Lab\_  
Utah\_Department\_of\_Health\_  
Utah\_Department\_of\_Health\_  
North\_Carolina\_State\_Laboratory\_of\_Public\_Health\_  
Wisconsin\_State\_Laboratory\_of\_Hygiene\_  
Florida\_Department\_of\_Health-Jacksonville\_  
Wisconsin\_State\_Laboratory\_of\_Hygiene\_  
Colorado\_Department\_of\_Health\_Lab\_  
Niigata\_City\_Institute\_of\_Public\_Health\_and\_Environment\_  
Ohio\_Department\_of\_Health\_Laboratories\_  
Microbiology\_Services\_Colindale\_Public\_Health\_England\_  
Indiana\_State\_Department\_of\_Health\_Laboratories\_  
Indiana\_State\_Department\_of\_Health\_Laboratories\_  
Southern\_Nevada\_Public\_Health\_Lab\_  
Southern\_Nevada\_Public\_Health\_Lab\_  
Illinois\_Department\_of\_Public\_Health-Chicago\_  
University\_of\_Michigan\_SPH\_EPID\_  
University\_of\_Michigan\_SPH\_EPID\_  
Toyama\_Institute\_of\_Health\_  
Delaware\_Public\_Health\_Lab\_  
Montana\_Laboratory\_Services\_Bureau\_  
Indiana\_State\_Department\_of\_Health\_Laboratories\_  
Ethiopian\_Health\_and\_Nutrition\_Research\_Institute\_(EHNRI)  
Ohio\_Department\_of\_Health\_Laboratories\_  
National\_Public\_Health\_Laboratory\_  
Indiana\_State\_Department\_of\_Health\_Laboratories\_  
Minnesota\_Department\_of\_Health\_  
Laboratorio\_Nacional\_De\_Salud\_Guatemala\_  
Laboratorio\_Nacional\_De\_Salud\_Guatemala\_  
Ethiopian\_Health\_and\_Nutrition\_Research\_Institute\_(EHNRI)  
North\_Carolina\_State\_Laboratory\_of\_Public\_Health\_  
North\_Carolina\_State\_Laboratory\_of\_Public\_Health\_  
North\_Carolina\_State\_Laboratory\_of\_Public\_Health\_  
North\_Carolina\_State\_Laboratory\_of\_Public\_Health\_  
North\_Carolina\_State\_Laboratory\_of\_Public\_Health\_  
State\_of\_Hawaii\_Department\_of\_Health\_  
Georgia\_Public\_Health\_Laboratory\_  
Laboratorio\_Nacional\_De\_Salud\_Guatemala\_  
Mississippi\_Public\_Health\_Laboratory\_  
  
Wyoming\_Public\_Health\_Laboratory\_  
North\_Carolina\_State\_Laboratory\_of\_Public\_Health\_  
University\_of\_Michigan\_SPH\_EPID\_  
Georgia\_Public\_Health\_Laboratory\_  
Georgia\_Public\_Health\_Laboratory\_  
Laboratorio\_Nacional\_De\_Salud\_Guatemala\_  
Iowa\_State\_Hygienic\_Laboratory\_  
National\_Influenza\_Lab\_  
National\_Influenza\_Lab\_  
Minnesota\_Department\_of\_Health\_  
National\_Influenza\_Lab\_  
New\_Jersey\_Department\_of\_Health\_&\_Senior\_Services\_  
Missouri\_Department\_of\_Health\_&\_Senior\_Services\_  
Baylor\_College\_of\_Medicine\_  
  
Louisiana\_Department\_of\_Health\_and\_Hospitals\_  
Louisiana\_Department\_of\_Health\_and\_Hospitals\_  
Louisiana\_Department\_of\_Health\_and\_Hospitals\_  
Wyoming\_Public\_Health\_Laboratory\_  
Missouri\_Department\_of\_Health\_&\_Senior\_Services\_  
Baylor\_College\_of\_Medicine\_  
New\_Mexico\_Department\_of\_Health\_  
Massachusetts\_Department\_of\_Public\_Health\_  
Oregon\_Public\_Health\_Laboratory\_  
Wyoming\_Public\_Health\_Laboratory\_  
Louisiana\_Department\_of\_Health\_and\_Hospitals\_  
National\_Microbiology\_Laboratory\_Health\_Canada\_  
National\_Influenza\_Lab\_  
National\_Influenza\_Lab\_  
New\_Hampshire\_Public\_Health\_Laboratories\_  
Louisiana\_Department\_of\_Health\_and\_Hospitals\_  
Louisiana\_Department\_of\_Health\_and\_Hospitals\_  
Louisiana\_Department\_of\_Health\_and\_Hospitals\_  
New\_Jersey\_Department\_of\_Health\_&\_Senior\_Services\_  
Massachusetts\_Department\_of\_Public\_Health\_  
Kansas\_Department\_of\_Health\_and\_Environment\_  
Ohio\_Department\_of\_Health\_Laboratories\_  
Louisiana\_Department\_of\_Health\_and\_Hospitals\_  
New\_Hampshire\_Public\_Health\_Laboratories\_  
National\_Influenza\_Lab\_  
National\_Influenza\_Lab\_  
Louisiana\_Department\_of\_Health\_and\_Hospitals\_  
National\_Influenza\_Lab\_  
Louisiana\_Department\_of\_Health\_and\_Hospitals\_  
Massachusetts\_Department\_of\_Public\_Health\_  
Delaware\_Public\_Health\_Lab\_  
Georgia\_Public\_Health\_Laboratory\_  
Georgia\_Public\_Health\_Laboratory\_  
Georgia\_Public\_Health\_Laboratory\_  
Georgia\_Public\_Health\_Laboratory\_  
Colorado\_Department\_of\_Health\_Lab\_  
New\_Jersey\_Department\_of\_Health\_&\_Senior\_Services\_

[illegible]

[illegible]

Microbiology\_Services\_Colindale\_Public\_Health\_England\_  
Georgia\_Public\_Health\_Laboratory\_  
Russian\_Academy\_of\_Medical\_Sciences\_  
\_  
\_  
North\_Dakota\_Department\_of\_Health\_  
Southern\_Nevada\_Public\_Health\_Lab\_  
Tokyo\_Metropolitan\_Institute\_of\_Public\_Health\_  
Nevada\_State\_Health\_Laboratory\_  
California\_Department\_of\_Health\_Services\_  
ADPH\_Bureau\_of\_Clinical\_Laboratories\_  
Ohio\_Department\_of\_Health\_Laboratories\_  
California\_Department\_of\_Health\_Services\_  
Laboratorio\_de\_Virus\_Respiratorio\_  
Tennessee\_Department\_of\_Health\_Laboratory-Nashville\_  
Missouri\_Department\_of\_Health\_&\_Senior\_Services\_  
North\_Carolina\_State\_Laboratory\_of\_Public\_Health\_  
New\_Hampshire\_Public\_Health\_Laboratories\_  
Central\_Laboratory\_of\_Public\_Health\_  
UPMC-CLB\_Dept\_of\_Microbiology\_  
Minnesota\_Department\_of\_Health\_  
INRB\_Service\_de\_Virologie\_  
Microbiology\_Services\_Colindale\_Public\_Health\_England\_  
Florida\_Department\_of\_Health-Jacksonville\_  
Nebraska\_Public\_Health\_Lab\_  
Utah\_Department\_of\_Health\_  
Utah\_Department\_of\_Health\_  
Indiana\_State\_Department\_of\_Health\_Laboratories\_  
University\_of\_Virginia\_Medical\_Labs/Microbiology\_  
National\_Influenza\_Lab\_  
National\_Influenza\_Lab\_  
National\_Influenza\_Lab\_  
Texas\_Department\_of\_State\_Health\_Services-Laboratory\_Services\_  
Microbiology\_Services\_Colindale\_Public\_Health\_England\_  
Louisiana\_Department\_of\_Health\_and\_Hospitals\_  
National\_Influenza\_Lab\_  
Wakayama\_City\_Institute\_of\_Public\_Health\_  
Georgia\_Public\_Health\_Laboratory\_  
Delaware\_Public\_Health\_Lab\_  
Baylor\_College\_of\_Medicine\_  
Delaware\_Public\_Health\_Lab\_  
Utah\_Department\_of\_Health\_  
National\_Microbiology\_Laboratory\_Health\_Canada\_  
Minnesota\_Department\_of\_Health\_  
Fukui\_Prefectural\_Institute\_of\_Public\_Health\_  
Marshfield\_Clinic\_Research\_Foundation\_  
Marshfield\_Clinic\_Research\_Foundation\_  
Marshfield\_Clinic\_Research\_Foundation\_  
Kansas\_Department\_of\_Health\_and\_Environment\_  
Florida\_Department\_of\_Health-Jacksonville\_  
Mississippi\_Public\_Health\_Laboratory\_  
Rhode\_Island\_Department\_of\_Health\_  
Texas\_Department\_of\_State\_Health\_Services\_South\_Texas\_Laboratory\_  
Arkansas\_Department\_of\_Health\_  
Texas\_Department\_of\_State\_Health\_Services\_South\_Texas\_Laboratory\_  
Texas\_Department\_of\_State\_Health\_Services\_South\_Texas\_Laboratory\_  
University\_of\_Virginia\_Medical\_Labs/Microbiology\_  
Mississippi\_Public\_Health\_Laboratory\_  
Tennessee\_Department\_of\_Health\_Laboratory-Nashville\_  
Tennessee\_Department\_of\_Health\_Laboratory-Nashville\_  
ADPH\_Bureau\_of\_Clinical\_Laboratories\_  
Texas\_Department\_of\_State\_Health\_Services\_South\_Texas\_Laboratory\_  
Montana\_Laboratory\_Services\_Bureau\_  
Laboratorio\_de\_Virus\_Respiratorio\_  
Indiana\_State\_Department\_of\_Health\_Laboratories\_  
New\_Hampshire\_Public\_Health\_Laboratories\_  
National\_Influenza\_Lab\_  
Georgia\_Public\_Health\_Laboratory\_  
INRB\_Service\_de\_Virologie\_  
\_  
\_  
St\_Judes\_Childrens\_Research\_Hospital\_  
Microbiology\_Services\_Colindale\_Public\_Health\_England\_  
Microbiology\_Services\_Colindale\_Public\_Health\_England\_  
Microbiology\_Services\_Colindale\_Public\_Health\_England\_  
Marshfield\_Clinic\_Research\_Foundation\_  
Marshfield\_Clinic\_Research\_Foundation\_  
Marshfield\_Clinic\_Research\_Foundation\_  
Marshfield\_Clinic\_Research\_Foundation\_  
Ohio\_Department\_of\_Health\_Laboratories\_  
Tennessee\_Department\_of\_Health\_Laboratory-Nashville\_  
ADPH\_Bureau\_of\_Clinical\_Laboratories\_  
Tennessee\_Department\_of\_Health\_Laboratory-Nashville\_  
Montana\_Laboratory\_Services\_Bureau\_  
Mississippi\_Public\_Health\_Laboratory\_  
Virginia\_Division\_of\_Consolidated\_Laboratories\_  
Arkansas\_Department\_of\_Health\_  
Wyoming\_Public\_Health\_Laboratory\_  
Wyoming\_Public\_Health\_Laboratory\_  
UPMC-CLB\_Dept\_of\_Microbiology\_  
Laboratorio\_de\_Virus\_Respiratorio\_  
WHO\_National\_Influenza\_Centre\_National\_Institute\_of\_Medical\_Research\_(NIMR)\_  
National\_Influenza\_Lab\_  
INRB\_Service\_de\_Virologie\_  
\_  
\_  
\_  
University\_of\_Virginia\_Medical\_Labs/Microbiology\_  
\_  
Microbiology\_Services\_Colindale\_Public\_Health\_England\_  
Microbiology\_Services\_Colindale\_Public\_Health\_England\_  
Marshfield\_Clinic\_Research\_Foundation\_  
California\_Department\_of\_Health\_Services\_  
Texas\_Department\_of\_State\_Health\_Services-Laboratory\_Services\_  
Missouri\_Department\_of\_Health\_&\_Senior\_Services\_  
Wyoming\_Public\_Health\_Laboratory\_  
Virginia\_Division\_of\_Consolidated\_Laboratories\_  
Missouri\_Department\_of\_Health\_&\_Senior\_Services\_  
Maryland\_Department\_of\_Health\_and\_Mental\_Hygiene\_  
Russian\_Academy\_of\_Medical\_Sciences\_  
Microbiology\_Services\_Colindale\_Public\_Health\_England\_  
Microbiology\_Services\_Colindale\_Public\_Health\_England\_  
Microbiology\_Services\_Colindale\_Public\_Health\_England\_  
Louisiana\_Department\_of\_Health\_and\_Hospitals\_  
Nebraska\_Public\_Health\_Lab\_  
Virginia\_Division\_of\_Consolidated\_Laboratories\_  
Florida\_Department\_of\_Health-Jacksonville\_  
Virginia\_Division\_of\_Consolidated\_Laboratories\_  
Vermont\_Department\_of\_Health\_Laboratory\_  
Texas\_Department\_of\_State\_Health\_Services-Laboratory\_Services\_  
National\_Microbiology\_Laboratory\_Health\_Canada\_  
\_

Florida\_Department\_of\_Health-Tampa  
Illinois\_Department\_of\_Public\_Health-Chicago  
Montana\_Laboratory\_Services\_Bureau  
State\_of\_Idaho\_Bureau\_of\_Laboratories  
National\_Microbiology\_Laboratory\_Health\_Canada  
INRB\_Service\_of\_Virologie  
INRB\_Service\_of\_Virologie  
Florida\_Department\_of\_Health-Jacksonville  
Microbiology\_Services\_Colindale\_Public\_Health\_England  
Microbiology\_Services\_Colindale\_Public\_Health\_England  
Microbiology\_Services\_Colindale\_Public\_Health\_England  
Microbiology\_Services\_Colindale\_Public\_Health\_England  
Microbiology\_Services\_Colindale\_Public\_Health\_England  
Microbiology\_Services\_Colindale\_Public\_Health\_England  
Rhode\_Island\_Department\_of\_Health  
Marshfield\_Clinic\_Research\_Foundation  
DC\_Public\_Health\_Lab  
Marshfield\_Clinic\_Research\_Foundation  
Microbiology\_Services\_Colindale\_Public\_Health\_England  
Microbiology\_Services\_Colindale\_Public\_Health\_England  
Microbiology\_Services\_Colindale\_Public\_Health\_England  
Baylor\_College\_of\_Medicine  
Vermont\_Department\_of\_Health\_Laboratory  
Massachusetts\_Department\_of\_Public\_Health  
Microbiology\_Services\_Colindale\_Public\_Health\_England  
Nevada\_State\_Health\_Laboratory



[illegible]



[illegible]





Centers for Disease Control and Prevention  
Centers for Disease Control and Prevention



Alaska\_State\_Virology\_Lab\_  
Alaska\_State\_Virology\_Lab\_  
Instituto\_de\_Salud\_Publica\_de\_Chile\_  
Institute\_of\_Environmental\_Science\_&\_Research\_  
Institute\_of\_Environmental\_Science\_&\_Research\_  
Institute\_of\_Environmental\_Science\_&\_Research\_  
Laboratorio\_Nacional\_De\_Salud\_Guatemala\_  
Alaska\_State\_Virology\_Lab\_  
Alaska\_State\_Virology\_Lab\_  
WHO\_Chinese\_National\_Influenza\_Center\_  
Alaska\_State\_Virology\_Lab\_  
Alaska\_State\_Virology\_Lab\_  
Instituto\_Nacional\_de\_Enfermedades\_Infecciosas\_  
Instituto\_Nacional\_de\_Enfermedades\_Infecciosas\_  
Instituto\_Nacional\_de\_Enfermedades\_Infecciosas\_  
Instituto\_Nacional\_de\_Enfermedades\_Infecciosas\_  
Instituto\_Nacional\_de\_Enfermedades\_Infecciosas\_  
Instituto\_Nacional\_de\_Enfermedades\_Infecciosas\_  
Alaska\_State\_Virology\_Lab\_  
Institute\_of\_Environmental\_Science\_&\_Research\_  
Institute\_of\_Environmental\_Science\_&\_Research\_  
Departamento\_de\_Laboratorio\_de\_Salud\_Publica\_  
Washington\_State\_Public\_Health\_Laboratory\_  
Alaska\_State\_Virology\_Lab\_  
Alaska\_State\_Virology\_Lab\_  
Washington\_State\_Public\_Health\_Laboratory\_  
Alaska\_State\_Virology\_Lab\_  
Alaska\_State\_Virology\_Lab\_  
Virginia\_Division\_of\_Consolidated\_Laboratories\_  
Alaska\_State\_Virology\_Lab\_  
Alaska\_State\_Virology\_Lab\_  
Alaska\_State\_Virology\_Lab\_  
Laboratorio\_Nacional\_De\_Salud\_Guatemala\_  
Alaska\_State\_Virology\_Lab\_  
Alaska\_State\_Virology\_Lab\_  
Alaska\_State\_Virology\_Lab\_  
Alaska\_State\_Virology\_Lab\_  
Laboratorio\_Nacional\_De\_Salud\_Guatemala\_  
Alaska\_State\_Virology\_Lab\_  
Alaska\_State\_Virology\_Lab\_  
Alaska\_State\_Virology\_Lab\_  
Alaska\_State\_Virology\_Lab\_  
Alaska\_State\_Virology\_Lab\_  
Alaska\_State\_Virology\_Lab\_  
Arizona\_Department\_of\_Health\_Services\_  
Alaska\_State\_Virology\_Lab\_  
Alaska\_State\_Virology\_Lab\_  
Institute\_of\_Environmental\_Science\_&\_Research\_  
Alaska\_State\_Virology\_Lab\_  
Alaska\_State\_Virology\_Lab\_  
Alaska\_State\_Virology\_Lab\_  
Alaska\_State\_Virology\_Lab\_  
Florida\_Department\_of\_Health-Jacksonville\_  
Institute\_of\_Environmental\_Science\_&\_Research\_  
Institute\_of\_Environmental\_Science\_&\_Research\_  
Institute\_of\_Environmental\_Science\_&\_Research\_  
Alaska\_State\_Virology\_Lab\_  
National\_Influenza\_Center\_  
National\_Center\_for\_Laboratory\_and\_Epidemiology\_  
Instituto\_de\_Salud\_Publica\_de\_Chile\_  
Alaska\_State\_Virology\_Lab\_  
Alaska\_State\_Virology\_Lab\_  
Alaska\_State\_Virology\_Lab\_  
Alaska\_State\_Virology\_Lab\_  
Alaska\_State\_Virology\_Lab\_  
Alaska\_State\_Virology\_Lab\_  
Instituto\_de\_Salud\_Publica\_de\_Chile\_  
Instituto\_Conmemorativo\_Gorgas\_de\_Estudios\_de\_la\_Salud\_  
Alaska\_State\_Virology\_Lab\_  
Alaska\_State\_Virology\_Lab\_  
Alaska\_State\_Virology\_Lab\_  
Alaska\_State\_Virology\_Lab\_  
Alaska\_State\_Virology\_Lab\_  
Alaska\_State\_Virology\_Lab\_  
Instituto\_Nacional\_de\_Salud\_de\_Columbia\_  
Alaska\_State\_Virology\_Lab\_  
Laboratorio\_Nacional\_De\_Salud\_Guatemala\_  
Alaska\_State\_Virology\_Lab\_  
Alaska\_State\_Virology\_Lab\_  
Instituto\_de\_Salud\_Publica\_de\_Chile\_  
Alaska\_State\_Virology\_Lab\_  
Michigan\_Department\_of\_Community\_Health\_  
National\_Influenza\_Center\_French\_Guiana\_and\_French\_Indies\_  
Alaska\_State\_Virology\_Lab\_  
National\_Center\_for\_Laboratory\_and\_Epidemiology\_  
Alaska\_State\_Virology\_Lab\_  
Alaska\_State\_Virology\_Lab\_  
INSPI\_  
Oregon\_Public\_Health\_Laboratory\_  
Ministry\_of\_Health\_Laos\_  
Illinois\_Department\_of\_Public\_Health-Chicago\_  
North\_Carolina\_State\_Laboratory\_of\_Public\_Health\_  
Alaska\_State\_Virology\_Lab\_  
Instituto\_Nacional\_de\_Salud\_de\_Columbia\_  
Instituto\_Nacional\_de\_Salud\_de\_Columbia\_  
Alaska\_State\_Virology\_Lab\_  
Oregon\_Public\_Health\_Laboratory\_  
Alaska\_State\_Virology\_Lab\_  
Instituto\_Nacional\_de\_Enfermedades\_Infecciosas\_  
Instituto\_Nacional\_de\_Enfermedades\_Infecciosas\_  
Wisconsin\_State\_Laboratory\_of\_Hygiene\_  
Institute\_of\_Environmental\_Science\_&\_Research\_  
Institute\_of\_Environmental\_Science\_&\_Research\_  
Alaska\_State\_Virology\_Lab\_  
Alaska\_State\_Virology\_Lab\_  
Alaska\_State\_Virology\_Lab\_  
Alaska\_State\_Virology\_Lab\_  
Alaska\_State\_Virology\_Lab\_  
Alaska\_State\_Virology\_Lab\_  
Oregon\_Public\_Health\_Laboratory\_  
Laboratorio\_Nacional\_De\_Salud\_Guatemala\_  
Dallas\_County\_Health\_and\_Human\_Services\_  
Institute\_of\_Environmental\_Science\_&\_Research\_  
WHO\_National\_Influenza\_Centre\_National\_Institute\_of\_Medical\_Research\_(NIMR)\_  
Institute\_of\_Environmental\_Science\_&\_Research\_  
Alaska\_State\_Virology\_Lab\_  
Alaska\_State\_Virology\_Lab\_  
Alaska\_State\_Virology\_Lab\_  
Alaska\_State\_Virology\_Lab\_  
Microbiology\_Services\_Colindale\_Public\_Health\_England\_  
Institute\_of\_Environmental\_Science\_&\_Research\_  
Alaska\_State\_Virology\_Lab\_

[illegible]

Alaska\_State\_Virology\_Lab\_  
Alaska\_State\_Virology\_Lab\_  
Alaska\_State\_Virology\_Lab\_  
Alaska\_State\_Virology\_Lab\_  
Alaska\_State\_Virology\_Lab\_  
Puerto\_Rico\_Department\_of\_Health\_  
Alaska\_State\_Virology\_Lab\_  
Florida\_Department\_of\_Health-Tampa\_  
Alaska\_State\_Virology\_Lab\_  
Alaska\_State\_Virology\_Lab\_  
Alaska\_State\_Virology\_Lab\_  
Alaska\_State\_Virology\_Lab\_  
Alaska\_State\_Virology\_Lab\_  
Alaska\_State\_Virology\_Lab\_  
Alaska\_State\_Virology\_Lab\_  
New\_Jersey\_Department\_of\_Health\_&\_Senior\_Services\_  
State\_of\_Hawaii\_Department\_of\_Health\_  
Institute\_of\_Environmental\_Science\_&\_Research\_  
Laboratorio\_de\_Virus\_Respiratorio\_  
Institute\_of\_Environmental\_Science\_&\_Research\_  
Alaska\_State\_Virology\_Lab\_  
Alaska\_State\_Virology\_Lab\_  
Alaska\_State\_Virology\_Lab\_  
Alaska\_State\_Virology\_Lab\_  
Alaska\_State\_Virology\_Lab\_  
Departamento\_de\_Laboratorio\_de\_Salud\_Publica\_  
Alaska\_State\_Virology\_Lab\_  
Alaska\_State\_Virology\_Lab\_  
Alaska\_State\_Virology\_Lab\_  
Alaska\_State\_Virology\_Lab\_  
Alaska\_State\_Virology\_Lab\_  
State\_of\_Hawaii\_Department\_of\_Health\_  
Alaska\_State\_Virology\_Lab\_  
Institute\_of\_Environmental\_Science\_&\_Research\_  
Michigan\_Department\_of\_Community\_Health\_  
Puerto\_Rico\_Department\_of\_Health\_  
Ministry\_of\_Health\_Laos\_  
Alaska\_State\_Virology\_Lab\_  
State\_of\_Hawaii\_Department\_of\_Health\_  
Departamento\_de\_Laboratorio\_de\_Salud\_Publica\_  
Instituto\_Nacional\_de\_Laboratoriosde\_Salud\_(INLASA)\_  
State\_of\_Hawaii\_Department\_of\_Health\_  
State\_of\_Hawaii\_Department\_of\_Health\_  
Alaska\_State\_Virology\_Lab\_  
Laboratorio\_de\_Virus\_Respiratorio\_  
New\_York\_State\_Department\_of\_Health\_  
Instituto\_Nacional\_de\_Salud\_de\_Columbia\_  
Alaska\_State\_Virology\_Lab\_  
Instituto\_Nacional\_de\_Enfermedades\_Infecciosas\_  
Instituto\_Nacional\_de\_Enfermedades\_Infecciosas\_  
Connecticut\_Department\_of\_Public\_Health\_  
Utah\_Department\_of\_Health\_  
Puerto\_Rico\_Department\_of\_Health\_  
Puerto\_Rico\_Department\_of\_Health\_  
CEMIC\_University\_Hospital\_  
CEMIC\_University\_Hospital\_  
CEMIC\_University\_Hospital\_  
CEMIC\_University\_Hospital\_  
National\_Center\_for\_Laboratory\_and\_Epidemiology\_  
National\_Influenza\_Centre\_French\_Guiana\_and\_French\_Indies\_  
Washington\_State\_Public\_Health\_Laboratory\_  
Arizona\_Department\_of\_Health\_Services\_  
Puerto\_Rico\_Department\_of\_Health\_  
Instituto\_Nacional\_de\_Enfermedades\_Infecciosas\_  
Ministry\_of\_Health\_Laos\_  
Oregon\_Public\_Health\_Laboratory\_  
Nebraska\_Public\_Health\_Lab\_  
Instituto\_Nacional\_de\_Enfermedades\_Infecciosas\_  
Instituto\_Nacional\_de\_Enfermedades\_Infecciosas\_  
National\_Center\_for\_Laboratory\_and\_Epidemiology\_  
Instituto\_Nacional\_de\_Enfermedades\_Infecciosas\_  
Instituto\_Nacional\_de\_Enfermedades\_Infecciosas\_  
Instituto\_Conmemorativo\_Gorgas\_de\_Estudios\_de\_la\_Salud\_  
State\_of\_Hawaii\_Department\_of\_Health\_  
Oregon\_Public\_Health\_Laboratory\_  
Instituto\_Nacional\_de\_Enfermedades\_Infecciosas\_  
Instituto\_Nacional\_de\_Enfermedades\_Infecciosas\_  
Alaska\_State\_Virology\_Lab\_  
Instituto\_Nacional\_de\_Enfermedades\_Infecciosas\_  
Departamento\_de\_Laboratorio\_de\_Salud\_Publica\_  
CEMIC\_University\_Hospital\_  
Alaska\_State\_Virology\_Lab\_  
Alaska\_State\_Virology\_Lab\_  
Instituto\_Nacional\_de\_Salud\_de\_Columbia\_  
WHO\_National\_Influenza\_Centre\_National\_Institute\_of\_Medical\_Research\_(NIMR)\_  
New\_York\_State\_Department\_of\_Health\_  
Departamento\_de\_Laboratorio\_de\_Salud\_Publica\_  
Puerto\_Rico\_Department\_of\_Health\_  
Instituto\_Nacional\_de\_Enfermedades\_Infecciosas\_  
US\_NAMRU-6\_  
Puerto\_Rico\_Department\_of\_Health\_  
Alaska\_State\_Virology\_Lab\_  
Alaska\_State\_Virology\_Lab\_  
Iowa\_State\_Hygienic\_Laboratory\_  
WHO\_National\_Influenza\_Centre\_National\_Institute\_of\_Medical\_Research\_(NIMR)\_  
Instituto\_Nacional\_de\_Enfermedades\_Infecciosas\_  
Ministry\_of\_Health\_Laos\_  
CEMIC\_University\_Hospital\_  
CEMIC\_University\_Hospital\_  
Ohio\_Department\_of\_Health\_Laboratories\_  
Alaska\_State\_Virology\_Lab\_  
Instituto\_Nacional\_de\_Salud\_de\_Columbia\_  
State\_of\_Hawaii\_Department\_of\_Health\_  
Ohio\_Department\_of\_Health\_Laboratories\_  
Instituto\_Nacional\_de\_Enfermedades\_Infecciosas\_  
Alaska\_State\_Virology\_Lab\_  
Alaska\_State\_Virology\_Lab\_  
Instituto\_Nacional\_de\_Enfermedades\_Infecciosas\_  
Instituto\_Nacional\_de\_Enfermedades\_Infecciosas\_  
Alaska\_State\_Virology\_Lab\_  
Alaska\_State\_Virology\_Lab\_  
Iowa\_State\_Hygienic\_Laboratory\_  
Florida\_Department\_of\_Health-Tampa\_  
Instituto\_Nacional\_de\_Enfermedades\_Infecciosas\_  
Instituto\_Nacional\_de\_Enfermedades\_Infecciosas\_  
Florida\_Department\_of\_Health-Tampa\_  
Alaska\_State\_Virology\_Lab\_  
Instituto\_Nacional\_de\_Enfermedades\_Infecciosas\_  
Instituto\_Nacional\_de\_Enfermedades\_Infecciosas\_  
Instituto\_Nacional\_de\_Enfermedades\_Infecciosas\_  
Instituto\_Nacional\_de\_Enfermedades\_Infecciosas\_  
WHO\_National\_Influenza\_Centre\_National\_Institute\_of\_Medical\_Research\_(NIMR)\_

[illegible]



Alaska\_State\_Virology\_Lab\_  
 Florida\_Department\_of\_Health-Tampa\_  
 Ohio\_Department\_of\_Health\_Laboratories\_  
 North\_Carolina\_State\_Laboratory\_of\_Public\_Health\_  
 Institute\_of\_Epidemiology\_Disease\_Control\_and\_Research\_(IEDCR)\_&\_Bangladesh\_National\_Influenza\_Centre\_(NIC)\_  
 Alaska\_State\_Virology\_Lab\_  
 Institute\_of\_Epidemiology\_Disease\_Control\_and\_Research\_(IEDCR)\_&\_Bangladesh\_National\_Influenza\_Centre\_(NIC)\_  
 Alaska\_State\_Virology\_Lab\_  
 Alaska\_State\_Virology\_Lab\_  
 Florida\_Department\_of\_Health-Tampa\_  
 Florida\_Department\_of\_Health-Tampa\_  
 Alaska\_State\_Virology\_Lab\_  
 Tennessee\_Department\_of\_Health\_Laboratory-Nashville\_  
 Michigan\_Department\_of\_Community\_Health\_  
 Tennessee\_Department\_of\_Health\_Laboratory-Nashville\_  
 Alaska\_State\_Virology\_Lab\_  
 Alaska\_State\_Virology\_Lab\_  
 Instituto\_Nacional\_de\_Laboratoriosde\_Salud\_(INLASA)\_  
 Florida\_Department\_of\_Health-Tampa\_  
 State\_of\_Hawaii\_Department\_of\_Health\_  
 Tennessee\_Department\_of\_Health\_Laboratory-Nashville\_  
 Tennessee\_Department\_of\_Health\_Laboratory-Nashville\_  
 Vermont\_Department\_of\_Health\_Laboratory\_  
 Alaska\_State\_Virology\_Lab\_  
 Alaska\_State\_Virology\_Lab\_  
 Alaska\_State\_Virology\_Lab\_  
 Vermont\_Department\_of\_Health\_Laboratory\_  
 Alaska\_State\_Virology\_Lab\_  
 Alaska\_State\_Virology\_Lab\_  
 North\_Carolina\_State\_Laboratory\_of\_Public\_Health\_  
 Institute\_of\_Epidemiology\_Disease\_Control\_and\_Research\_(IEDCR)\_&\_Bangladesh\_National\_Influenza\_Centre\_(NIC)\_  
 Institute\_of\_Epidemiology\_Disease\_Control\_and\_Research\_(IEDCR)\_&\_Bangladesh\_National\_Influenza\_Centre\_(NIC)\_  
 Alaska\_State\_Virology\_Lab\_  
 Alaska\_State\_Virology\_Lab\_  
 Michigan\_Department\_of\_Community\_Health\_  
 Ministry\_of\_Health\_Laos\_  
 Alaska\_State\_Virology\_Lab\_  
 Alaska\_State\_Virology\_Lab\_  
 Ministry\_of\_Health\_Laos\_  
 State\_of\_Hawaii\_Department\_of\_Health\_  
 Ministry\_of\_Health\_Laos\_  
 Michigan\_Department\_of\_Community\_Health\_  
 Institute\_of\_Epidemiology\_Disease\_Control\_and\_Research\_(IEDCR)\_&\_Bangladesh\_National\_Influenza\_Centre\_(NIC)\_  
 Institute\_of\_Epidemiology\_Disease\_Control\_and\_Research\_(IEDCR)\_&\_Bangladesh\_National\_Influenza\_Centre\_(NIC)\_  
 Puerto\_Rico\_Department\_of\_Health\_  
 National\_Center\_for\_Laboratory\_and\_Epidemiology\_  
 National\_Center\_for\_Laboratory\_and\_Epidemiology\_  
 Puerto\_Rico\_Department\_of\_Health\_  
 Texas\_Department\_of\_State\_Health\_Services-Laboratory\_Services\_  
 New\_York\_State\_Department\_of\_Health\_  
 State\_of\_Hawaii\_Department\_of\_Health\_  
 New\_York\_State\_Department\_of\_Health\_  
 US\_NAMRU-6\_  
 Alaska\_State\_Virology\_Lab\_  
 Arizona\_Department\_of\_Health\_Services\_  
 Institute\_of\_Epidemiology\_Disease\_Control\_and\_Research\_(IEDCR)\_&\_Bangladesh\_National\_Influenza\_Centre\_(NIC)\_  
 Alaska\_State\_Virology\_Lab\_  
 Wisconsin\_State\_Laboratory\_of\_Hygiene\_  
 Puerto\_Rico\_Department\_of\_Health\_  
 National\_Institute\_for\_Communicable\_Disease\_  
 Connecticut\_Department\_of\_Public\_Health\_  
 State\_of\_Hawaii\_Department\_of\_Health\_  
 Institute\_of\_Epidemiology\_Disease\_Control\_and\_Research\_(IEDCR)\_&\_Bangladesh\_National\_Influenza\_Centre\_(NIC)\_  
 Institute\_of\_Epidemiology\_Disease\_Control\_and\_Research\_(IEDCR)\_&\_Bangladesh\_National\_Influenza\_Centre\_(NIC)\_  
 Alaska\_State\_Virology\_Lab\_  
 Alaska\_State\_Virology\_Lab\_  
 California\_Department\_of\_Health\_Services\_  
 Puerto\_Rico\_Department\_of\_Health\_  
 Alaska\_State\_Virology\_Lab\_  
 Institute\_of\_Epidemiology\_Disease\_Control\_and\_Research\_(IEDCR)\_&\_Bangladesh\_National\_Influenza\_Centre\_(NIC)\_  
 Washington\_State\_Public\_Health\_Laboratory\_  
 Washington\_State\_Public\_Health\_Laboratory\_  
 Washington\_State\_Public\_Health\_Laboratory\_  
 Alaska\_State\_Virology\_Lab\_  
 Indiana\_State\_Department\_of\_Health\_Laboratories\_  
 Indiana\_State\_Department\_of\_Health\_Laboratories\_  
 National\_Center\_for\_Laboratory\_and\_Epidemiology\_  
 Wisconsin\_State\_Laboratory\_of\_Hygiene\_  
 Wisconsin\_State\_Laboratory\_of\_Hygiene\_  
 Minnesota\_Department\_of\_Health\_  
 Wisconsin\_State\_Laboratory\_of\_Hygiene\_  
 Minnesota\_Department\_of\_Health\_  
 Indiana\_State\_Department\_of\_Health\_Laboratories\_  
 Wisconsin\_State\_Laboratory\_of\_Hygiene\_  
 New\_Jersey\_Department\_of\_Health\_&\_Senior\_Services\_  
 Washington\_State\_Public\_Health\_Laboratory\_  
 Indiana\_State\_Department\_of\_Health\_Laboratories\_  
 Indiana\_State\_Department\_of\_Health\_Laboratories\_  
 Indiana\_State\_Department\_of\_Health\_Laboratories\_  
 Indiana\_State\_Department\_of\_Health\_Laboratories\_  
 Indiana\_State\_Department\_of\_Health\_Laboratories\_  
 Indiana\_State\_Department\_of\_Health\_Laboratories\_  
 Indiana\_State\_Department\_of\_Health\_Laboratories\_  
 Indiana\_State\_Department\_of\_Health\_Laboratories\_  
 New\_Hampshire\_Public\_Health\_Laboratories\_  
 Florida\_Department\_of\_Health-Tampa\_  
 State\_of\_Hawaii\_Department\_of\_Health\_  
 New\_Hampshire\_Public\_Health\_Laboratories\_  
 Alaska\_State\_Virology\_Lab\_  
 Ministry\_of\_Health\_Laos\_  
 Indiana\_State\_Department\_of\_Health\_Laboratories\_  
 Indiana\_State\_Department\_of\_Health\_Laboratories\_  
 Alaska\_State\_Virology\_Lab\_  
 Puerto\_Rico\_Department\_of\_Health\_  
 Indiana\_State\_Department\_of\_Health\_Laboratories\_  
 Indiana\_State\_Department\_of\_Health\_Laboratories\_  
 Indiana\_State\_Department\_of\_Health\_Laboratories\_  
 Nebraska\_Public\_Health\_Lab\_  
 Alaska\_State\_Virology\_Lab\_  
 Alaska\_State\_Virology\_Lab\_  
 Iowa\_State\_Hygienic\_Laboratory\_  
 Iowa\_State\_Hygienic\_Laboratory\_  
 ADPH\_Bureau\_of\_Clinical\_Laboratories\_  
 California\_Department\_of\_Health\_Services\_  
 Alaska\_State\_Virology\_Lab\_  
 Alaska\_State\_Virology\_Lab\_  
 Microbiology\_Services\_Colindale\_Public\_Health\_England\_  
 New\_York\_State\_Department\_of\_Health\_  
 Alaska\_State\_Virology\_Lab\_  
 Washington\_State\_Public\_Health\_Laboratory\_

[illegible]

[illegible]

Wisconsin\_State\_Laboratory\_of\_Hygiene\_  
Montana\_Public\_Health\_Laboratory\_  
Montana\_Public\_Health\_Laboratory\_  
Michigan\_Department\_of\_Community\_Health\_  
Washington\_State\_Public\_Health\_Laboratory\_  
Washington\_State\_Public\_Health\_Laboratory\_  
Alaska\_State\_Virology\_Lab\_  
Michigan\_Department\_of\_Community\_Health\_  
Montana\_Public\_Health\_Laboratory\_  
South\_Carolina\_Department\_of\_Health\_  
National\_Influenza\_Reference\_Laboratory\_  
Wyoming\_Public\_Health\_Laboratory\_  
National\_Influenza\_Reference\_Laboratory\_  
Wyoming\_Public\_Health\_Laboratory\_  
Wisconsin\_State\_Laboratory\_of\_Hygiene\_  
Montana\_Laboratory\_Services\_Bureau\_  
Massachusetts\_Department\_of\_Public\_Health\_  
Montana\_Laboratory\_Services\_Bureau\_  
California\_Department\_of\_Health\_Services\_  
Massachusetts\_Department\_of\_Public\_Health\_  
Montana\_Laboratory\_Services\_Bureau\_  
Montana\_Laboratory\_Services\_Bureau\_  
Montana\_Laboratory\_Services\_Bureau\_  
State\_of\_Hawaii\_Department\_of\_Health\_  
Kentucky\_Division\_of\_Laboratory\_Services\_  
Kentucky\_Division\_of\_Laboratory\_Services\_  
North\_Carolina\_State\_Laboratory\_of\_Public\_Health\_  
North\_Carolina\_State\_Laboratory\_of\_Public\_Health\_  
Indiana\_State\_Department\_of\_Health\_Laboratories\_  
State\_of\_Hawaii\_Department\_of\_Health\_  
National\_Microbiology\_Laboratory\_Health\_Canada\_  
Arizona\_Department\_of\_Health\_Services\_  
Arizona\_Department\_of\_Health\_Services\_  
State\_of\_Hawaii\_Department\_of\_Health\_  
State\_of\_Hawaii\_Department\_of\_Health\_  
State\_of\_Hawaii\_Department\_of\_Health\_  
National\_Microbiology\_Laboratory\_Health\_Canada\_  
State\_of\_Hawaii\_Department\_of\_Health\_  
Michigan\_Department\_of\_Community\_Health\_  
National\_Microbiology\_Laboratory\_Health\_Canada\_  
National\_Microbiology\_Laboratory\_Health\_Canada\_  
Arizona\_Department\_of\_Health\_Services\_  
Vermont\_Department\_of\_Health\_Laboratory\_  
Arizona\_Department\_of\_Health\_Services\_  
National\_Institute\_for\_Communicable\_Disease\_  
Wisconsin\_State\_Laboratory\_of\_Hygiene\_  
Florida\_Department\_of\_Health-Jacksonville\_  
California\_Department\_of\_Health\_Services\_  
California\_Department\_of\_Health\_Services\_  
National\_Microbiology\_Laboratory\_Health\_Canada\_  
National\_Microbiology\_Laboratory\_Health\_Canada\_  
Arizona\_Department\_of\_Health\_Services\_  
Alaska\_State\_Virology\_Lab\_  
Pennsylvania\_Department\_of\_Health\_  
Microbiology\_Services\_Colindale\_Public\_Health\_England\_  
National\_Institute\_for\_Communicable\_Disease\_  
Florida\_Department\_of\_Health-Jacksonville\_  
State\_of\_Hawaii\_Department\_of\_Health\_  
Missouri\_Department\_of\_Health\_and\_Senior\_Services\_  
Missouri\_Department\_of\_Health\_and\_Senior\_Services\_  
South\_Carolina\_Department\_of\_Health\_  
Washington\_State\_Public\_Health\_Laboratory\_  
State\_of\_Hawaii\_Department\_of\_Health\_  
Michigan\_Department\_of\_Community\_Health\_  
State\_of\_Hawaii\_Department\_of\_Health\_  
State\_of\_Hawaii\_Department\_of\_Health\_  
Missouri\_Department\_of\_Health\_and\_Senior\_Services\_  
Alaska\_State\_Virology\_Lab\_  
Alaska\_State\_Virology\_Lab\_  
Florida\_Department\_of\_Health-Tampa\_  
State\_of\_Hawaii\_Department\_of\_Health\_  
State\_of\_Hawaii\_Department\_of\_Health\_  
State\_of\_Hawaii\_Department\_of\_Health\_  
State\_of\_Hawaii\_Department\_of\_Health\_  
Michigan\_Department\_of\_Community\_Health\_  
Michigan\_Department\_of\_Community\_Health\_  
Michigan\_Department\_of\_Community\_Health\_  
Montana\_Laboratory\_Services\_Bureau\_  
Alaska\_State\_Virology\_Lab\_  
Texas\_Department\_of\_State\_Health\_Services-Laboratory\_Services\_  
Texas\_Department\_of\_State\_Health\_Services-Laboratory\_Services\_  
South\_Carolina\_Department\_of\_Health\_  
South\_Carolina\_Department\_of\_Health\_  
South\_Carolina\_Department\_of\_Health\_  
Maine\_Health\_and\_Environmental\_Testing\_Laboratory\_  
Montana\_Laboratory\_Services\_Bureau\_  
South\_Carolina\_Department\_of\_Health\_  
Washington\_State\_Public\_Health\_Laboratory\_  
National\_Microbiology\_Laboratory\_Health\_Canada\_  
National\_Microbiology\_Laboratory\_Health\_Canada\_  
National\_Microbiology\_Laboratory\_Health\_Canada\_  
National\_Microbiology\_Laboratory\_Health\_Canada\_  
National\_Microbiology\_Laboratory\_Health\_Canada\_  
National\_Microbiology\_Laboratory\_Health\_Canada\_  
National\_Microbiology\_Laboratory\_Health\_Canada\_  
National\_Microbiology\_Laboratory\_Health\_Canada\_  
Oregon\_Public\_Health\_Laboratory\_  
West\_Virginia\_Office\_of\_Laboratory\_Services\_  
State\_of\_Hawaii\_Department\_of\_Health\_  
State\_of\_Hawaii\_Department\_of\_Health\_  
Maryland\_Department\_of\_Health\_and\_Mental\_Hygiene\_  
Maine\_Health\_and\_Environmental\_Testing\_Laboratory\_  
Oregon\_Public\_Health\_Laboratory\_  
Oregon\_Public\_Health\_Laboratory\_  
Oregon\_Public\_Health\_Laboratory\_  
Oklahoma\_State\_Department\_of\_Health\_  
National\_Microbiology\_Laboratory\_Health\_Canada\_  
Georgia\_Public\_Health\_Laboratory\_  
State\_of\_Hawaii\_Department\_of\_Health\_  
State\_of\_Hawaii\_Department\_of\_Health\_  
Government\_Virus\_Unit\_  
National\_Microbiology\_Laboratory\_Health\_Canada\_  
Government\_Virus\_Unit\_  
Washington\_State\_Public\_Health\_Laboratory\_  
New\_Hampshire\_Public\_Health\_Laboratories\_  
Massachusetts\_Department\_of\_Public\_Health\_  
National\_Microbiology\_Laboratory\_Health\_Canada\_

[illegible]



\_Colorado\_Department\_of\_Health\_Lab\_  
\_Colorado\_Department\_of\_Health\_Lab\_  
---  
---  
\_Colorado\_Department\_of\_Health\_Lab\_  
\_Pennsylvania\_Department\_of\_Health\_  
---  
---  
\_Alaska\_State\_Virology\_Lab\_  
\_Alaska\_State\_Virology\_Lab\_  
\_California\_Department\_of\_Health\_Services\_  
\_Marshfield\_Clinic\_Research\_Foundation\_  
---  
\_Florida\_Department\_of\_Health-Tampa\_  
\_Texas\_Department\_of\_State\_Health\_Services-Laboratory\_Services\_  
\_Colorado\_Department\_of\_Health\_Lab\_

\_Centers\_for\_Disease\_Control\_and\_Prevention  
\_Centers\_for\_Disease\_Control\_and\_Prevention  
\_Swedish\_Institute\_for\_Infectious\_Disease\_Control  
\_Swedish\_Institute\_for\_Infectious\_Disease\_Control  
\_Swedish\_Institute\_for\_Infectious\_Disease\_Control  
\_Centers\_for\_Disease\_Control\_and\_Prevention  
\_Centers\_for\_Disease\_Control\_and\_Prevention  
\_Swedish\_Institute\_for\_Infectious\_Disease\_Control  
\_Swedish\_Institute\_for\_Infectious\_Disease\_Control  
\_Centers\_for\_Disease\_Control\_and\_Prevention  
\_Centers\_for\_Disease\_Control\_and\_Prevention  
\_Centers\_for\_Disease\_Control\_and\_Prevention  
\_Centers\_for\_Disease\_Control\_and\_Prevention  
\_Swedish\_Institute\_for\_Infectious\_Disease\_Control  
\_Centers\_for\_Disease\_Control\_and\_Prevention  
\_Centers\_for\_Disease\_Control\_and\_Prevention  
\_Centers\_for\_Disease\_Control\_and\_Prevention
